# Supplementary material
Source: HighWire-hosted journal article supplement (doi:10.1101/rna.079050.121)

A

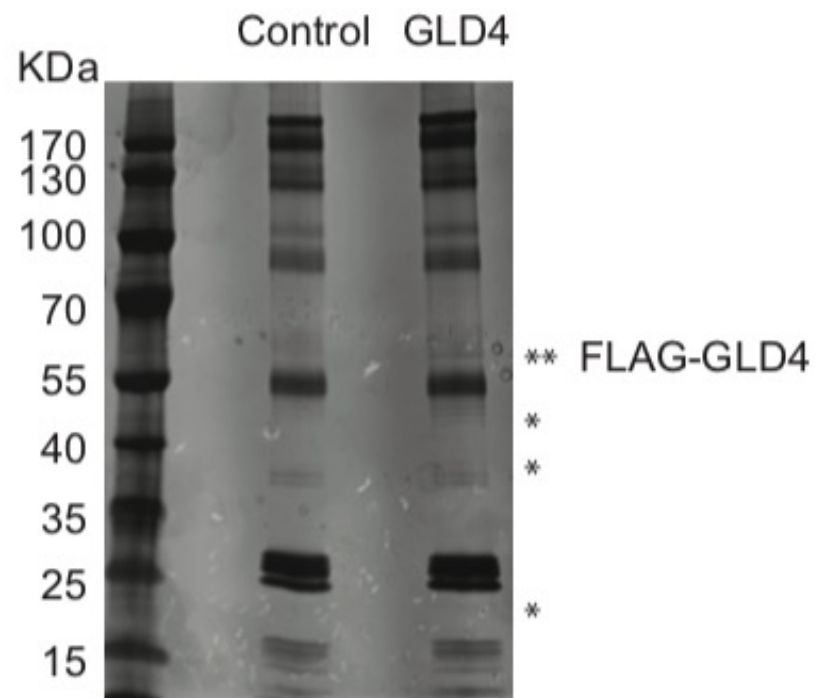

B

## Gld4-interacting RNA binding proteins

| Accession Number | Protein Name     | Localization | RNA binding specificity | Coverage |
|------------------|------------------|--------------|-------------------------|----------|
| <i>Q8NDF8</i>    | <i>GLD4</i>      | <i>N, C</i>  | <i>NS</i>               | 23%      |
| <i>P07910</i>    | <i>HNRNPC</i>    | <i>N, C</i>  | <i>poly U</i>           | 24%      |
| <i>O60506</i>    | <i>SYNCRIP</i>   | <i>N, C</i>  | <i>poly A</i>           | 9%       |
| <i>Q08211</i>    | <i>DHX9</i>      | <i>N, C</i>  | <i>DR</i>               | 8%       |
| <i>Q8NC51</i>    | <i>SERBP1</i>    | <i>N, C</i>  | <i>ND</i>               | 8%       |
| <i>O14979</i>    | <i>HNRNPDL</i>   | <i>N, C</i>  | <i>AU rich</i>          | 6%       |
| <i>P51114</i>    | <i>FXR1</i>      | <i>N, C</i>  | <i>poly G, U</i>        | 6%       |
| <i>O00148</i>    | <i>DDX39A</i>    | <i>N, C</i>  | <i>ND</i>               | 5%       |
| <i>Q13283</i>    | <i>G3BP1</i>     | <i>N, C</i>  | <i>ND</i>               | 5%       |
| <i>Q04637</i>    | <i>EIF4G1</i>    | <i>C</i>     | <i>NS</i>               | 4%       |
| <i>Q06787</i>    | <i>FMR1</i>      | <i>N, C</i>  | <i>poly G, U</i>        | 2%       |
| <i>P60842</i>    | <i>EIF4A1</i>    | <i>C</i>     | <i>NS</i>               | 2%       |
| <i>Q92841</i>    | <i>DDX17</i>     | <i>N</i>     |                         | 12%      |
| <i>Q86U42</i>    | <i>PABPN1</i>    | <i>N</i>     |                         | 12%      |
| <i>Q1KMD3</i>    | <i>HNRNPUL2</i>  | <i>N</i>     |                         | 11%      |
| <i>Q13151</i>    | <i>HNRNPA0</i>   | <i>N</i>     |                         | 11%      |
| <i>Q12906</i>    | <i>ILF3</i>      | <i>N</i>     |                         | 10%      |
| <i>Q00839</i>    | <i>HNRNPU</i>    | <i>N</i>     |                         | 9%       |
| <i>P52272</i>    | <i>HNRNPM</i>    | <i>N</i>     |                         | 6%       |
| <i>P51991</i>    | <i>HNRNPA3</i>   | <i>N</i>     |                         | 6%       |
| <i>P22626</i>    | <i>HNRNPA2B1</i> | <i>N</i>     |                         | 5%       |
| <i>P17844</i>    | <i>DDX5</i>      | <i>N</i>     |                         | 4%       |
| <i>P09651</i>    | <i>HNRNPA1</i>   | <i>N</i>     |                         | 3%       |
| <i>O75533</i>    | <i>SF3B1</i>     | <i>N</i>     |                         | 3%       |
| <i>O75526</i>    | <i>RBMXL2</i>    | <i>N</i>     |                         | 2%       |
| <i>O43390</i>    | <i>HNRNPR</i>    | <i>N</i>     |                         | 2%       |
| <i>O00571</i>    | <i>DDX3X</i>     | <i>N</i>     |                         | 1%       |

NS: Non specific; DR: Double stranded RNA; ND: Not determined

Supplemental Fig 1

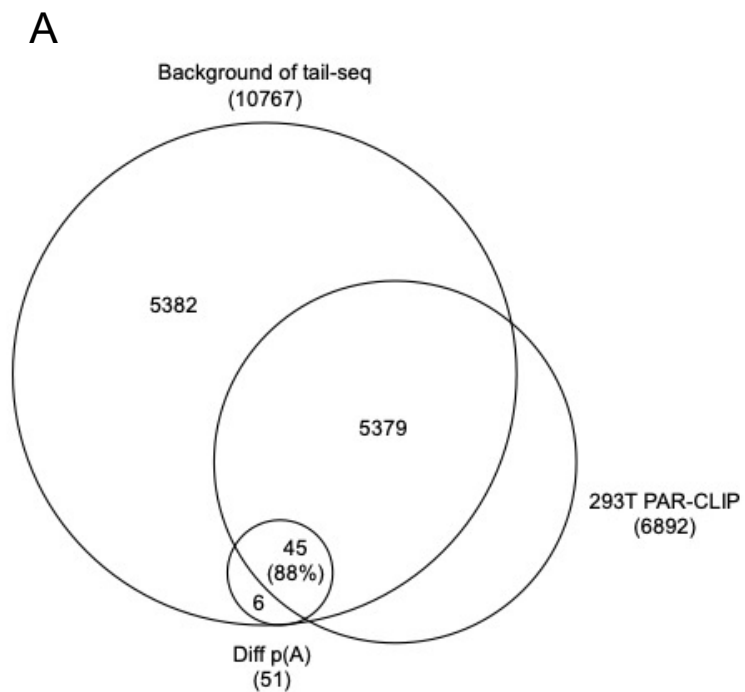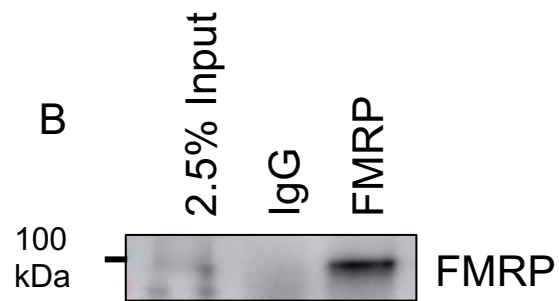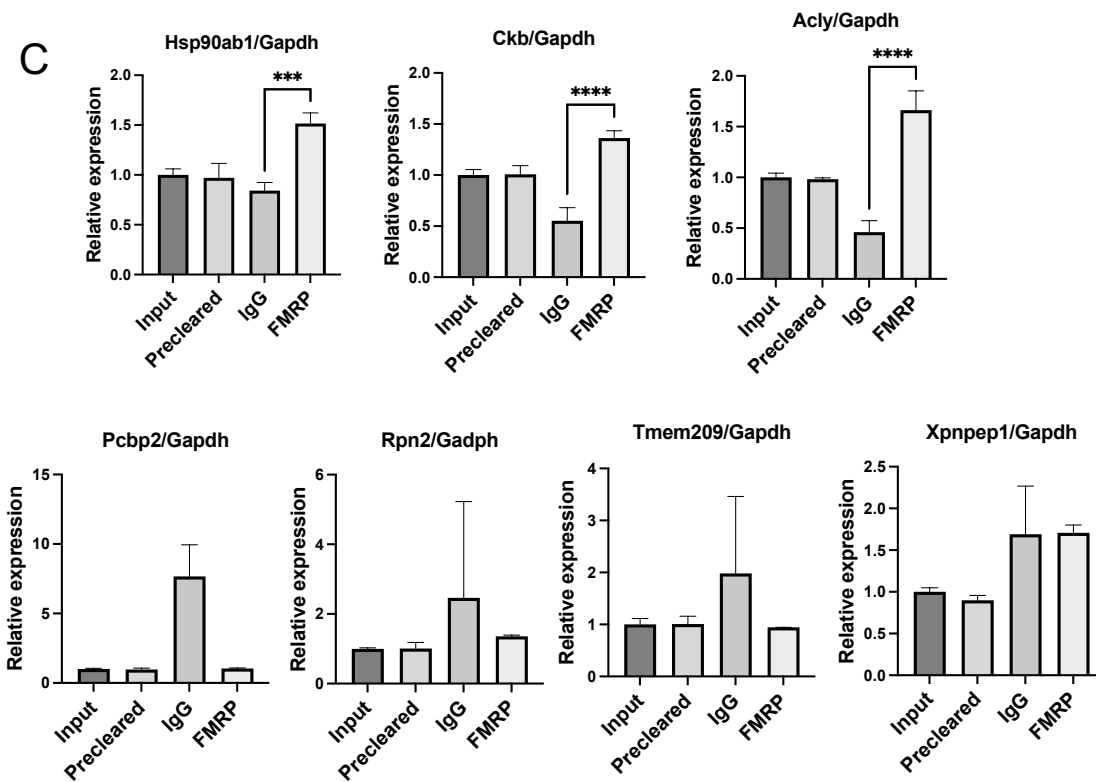

| Rank | Motif                                                                              | Name                                                                    | P-value | log P-pvalue | q-value (Benjamini) | # Target Sequences with Motif | % of Targets Sequences with Motif | # Background Sequences with Motif | % of Background Sequences with Motif |
|------|------------------------------------------------------------------------------------|-------------------------------------------------------------------------|---------|--------------|---------------------|-------------------------------|-----------------------------------|-----------------------------------|--------------------------------------|
| 1    |    | VRN1(ABI3VP1)/col-VRN1-DAP-Seq(GSE60143)/Homer                          | 1e-50   | -1.156e+02   | 0.0000              | 155.0                         | 13.49%                            | 0.5                               | 0.04%                                |
| 2    |    | PABPC1(?)/MEL-PABC1-CLIP-Seq(GSE69755)/Homer                            | 1e-33   | -7.607e+01   | 0.0000              | 400.0                         | 34.81%                            | 162.0                             | 13.65%                               |
| 3    |    | RLR1?/SacCer-Promoters/Homer                                            | 1e-32   | -7.594e+01   | 0.0000              | 240.0                         | 20.89%                            | 56.8                              | 4.78%                                |
| 4    |    | REM19(REM)/colamp-REM19-DAP-Seq(GSE60143)/Homer                         | 1e-28   | -6.502e+01   | 0.0000              | 269.0                         | 23.41%                            | 85.0                              | 7.16%                                |
| 5    |    | FOXP1(Forkhead)/H9-FOXP1-ChIP-Seq(GSE31006)/Homer                       | 1e-25   | -5.950e+01   | 0.0000              | 135.0                         | 11.75%                            | 17.1                              | 1.44%                                |
| 6    |    | Eomes(T-box)/H9-Eomes-ChIP-Seq(GSE26097)/Homer                          | 1e-24   | -5.715e+01   | 0.0000              | 308.0                         | 26.81%                            | 122.6                             | 10.32%                               |
| 7    |    | OCT4-SOX2-TCF-NANOG(POU,Homeobox,HMG)/mES-Oct4-ChIP-Seq(GSE11431)/Homer | 1e-24   | -5.643e+01   | 0.0000              | 101.0                         | 8.79%                             | 6.7                               | 0.57%                                |
| 8    |    | AT1G04880(ARID)/colamp-AT1G04880-DAP-Seq(GSE60143)/Homer                | 1e-23   | -5.300e+01   | 0.0000              | 73.0                          | 6.35%                             | 0.5                               | 0.04%                                |
| 9    |    | Mef2c(MADS)/GM12878-Mef2c-ChIP-Seq(GSE32465)/Homer                      | 1e-22   | -5.296e+01   | 0.0000              | 136.0                         | 11.84%                            | 22.2                              | 1.87%                                |
| 10   |    | Tbx21(T-box)/GM12878-TBX21-ChIP-Seq(Encode)/Homer                       | 1e-22   | -5.202e+01   | 0.0000              | 179.0                         | 15.58%                            | 45.6                              | 3.84%                                |
| 11   |    | At4g38000(C2C2dof)/col-At4g38000-DAP-Seq(GSE60143)/Homer                | 1e-22   | -5.199e+01   | 0.0000              | 269.0                         | 23.41%                            | 102.6                             | 8.64%                                |
| 12   |   | Hnf1(Homeobox)/Liver-Foxa2-Chip-Seq(GSE25694)/Homer                     | 1e-18   | -4.338e+01   | 0.0000              | 60.0                          | 5.22%                             | 0.0                               | 0.00%                                |
| 13   |  | Oct11(POU,Homeobox)/NCIH1048-POU2F3-ChIP-seq(GSE115123)/Homer           | 1e-18   | -4.188e+01   | 0.0000              | 107.0                         | 9.31%                             | 17.5                              | 1.48%                                |
| 14   |  | AT3G25990(Trihelix)/colamp-AT3G25990-DAP-Seq(GSE60143)/Homer            | 1e-17   | -4.065e+01   | 0.0000              | 176.0                         | 15.32%                            | 56.8                              | 4.78%                                |
| 15   |  | MYB3R1(MYB)/col-MYB3R1-DAP-Seq(GSE60143)/Homer                          | 1e-17   | -4.029e+01   | 0.0000              | 93.0                          | 8.09%                             | 12.9                              | 1.08%                                |

Supplemental Fig 3

A

| Table 2. Top list of different polyA RNAs in FMRP KO mice. |                              |          |
|------------------------------------------------------------|------------------------------|----------|
| Gene name                                                  | PolyA length in FMRP KO mice | pvalue   |
| Gsdmd                                                      | +135                         | 3,98E-02 |
| Itga10                                                     | +116                         | 9,90E-03 |
| Fam234a                                                    | +110                         | 3,48E-02 |
| Camta1                                                     | +107                         | 3,38E-02 |
| Gm2011                                                     | +103                         | 3,32E-02 |
| Gm5577                                                     | +97                          | 2,66E-02 |
| Frg2f1                                                     | +95                          | 3,84E-03 |
| Lrig3                                                      | +94                          | 3,53E-02 |
| Tbc1d1                                                     | +91                          | 1,37E-02 |
| Rgs11                                                      | +89                          | 3,22E-03 |
| Arhgap1                                                    | +88                          | 1,31E-02 |
| Adcy4                                                      | +85                          | 1,74E-02 |
| Dlgap1                                                     | +80                          | 3,95E-02 |
| Tial1                                                      | +79                          | 2,91E-02 |
| Azi2                                                       | +78                          | 4,75E-02 |
| Med12                                                      | -138                         | 3,96E-02 |
| Brpf3                                                      | -128                         | 3,22E-02 |
| Thsd4                                                      | -127                         | 4,09E-02 |
| Surf1                                                      | -119                         | 3,47E-02 |
| St7                                                        | -117                         | 7,74E-03 |
| Col26a1                                                    | -110                         | 2,13E-02 |
| Nt5dc2                                                     | -110                         | 3,80E-02 |
| Piga                                                       | -109                         | 3,95E-02 |
| Sirt1                                                      | -109                         | 2,69E-02 |
| Slc16a3                                                    | -104                         | 5,02E-03 |
| Atp11c                                                     | -102                         | 1,16E-02 |
| Nup210                                                     | -102                         | 1,86E-02 |
| Zdhhc24                                                    | -100                         | 3,55E-02 |
| Spag5                                                      | -98                          | 4,60E-02 |
| Ncapd3                                                     | -96                          | 1,72E-02 |

B

| Table 3. Top list of differentially expressed RNAs in FMRP KO mice. |                |             |
|---------------------------------------------------------------------|----------------|-------------|
| Gene name                                                           | log2FoldChange | pvalue      |
| Ttr                                                                 | 4,706138715    | 0,000746203 |
| Eno1b                                                               | 4,018161344    | 1,33E-65    |
| Pabpc112b-ps                                                        | 2,893730241    | 5,00E-05    |
| Lcn2                                                                | 2,888785735    | 0,002857194 |
| Fmr1                                                                | 2,837103639    | 4,09E-08    |
| Agl                                                                 | 2,620547673    | 2,85E-36    |
| Serpina3n                                                           | 2,501141302    | 0,002704949 |
| AC149090.1                                                          | 1,799280119    | 7,97E-05    |
| Ccn1                                                                | 1,607481408    | 9,77E-07    |
| Hmgcs2                                                              | 1,60323475     | 0,000720511 |
| Clasp2                                                              | 1,434590674    | 1,73E-28    |
| Btg2                                                                | 1,420043551    | 3,48E-10    |
| Cmip                                                                | 1,369020509    | 0,000156979 |
| Npas4                                                               | 1,147903423    | 0,001018073 |
| Dynlt1b                                                             | 1,057945469    | 1,13E-05    |
| Akap7                                                               | -5,145536827   | 0,004324928 |
| Ccdc142os                                                           | -5,017013271   | 0,005273313 |
| Tubd1                                                               | -4,693887055   | 0,012490827 |
| Tmem254a                                                            | -2,853417469   | 9,50E-05    |
| Gm9780                                                              | -2,298125884   | 0,001943021 |
| Tmem254a                                                            | -1,700910364   | 5,72E-17    |
| Plac9b                                                              | -1,686246724   | 0,012378009 |
| Tmem254c                                                            | -1,598165003   | 0,003255884 |
| Ncoa5                                                               | -1,385638772   | 0,003991992 |
| Polr2h                                                              | -1,340496837   | 0,019275243 |
| Kpna2                                                               | -1,233796251   | 0,001663893 |
| Tmem254b                                                            | -1,166714331   | 5,29E-06    |
| Cdkn1c                                                              | -1,144219918   | 0,008313182 |
| Rbp1                                                                | -1,075680001   | 5,62E-06    |
| Gm29562                                                             | -1,03183798    | 0,001262765 |

C

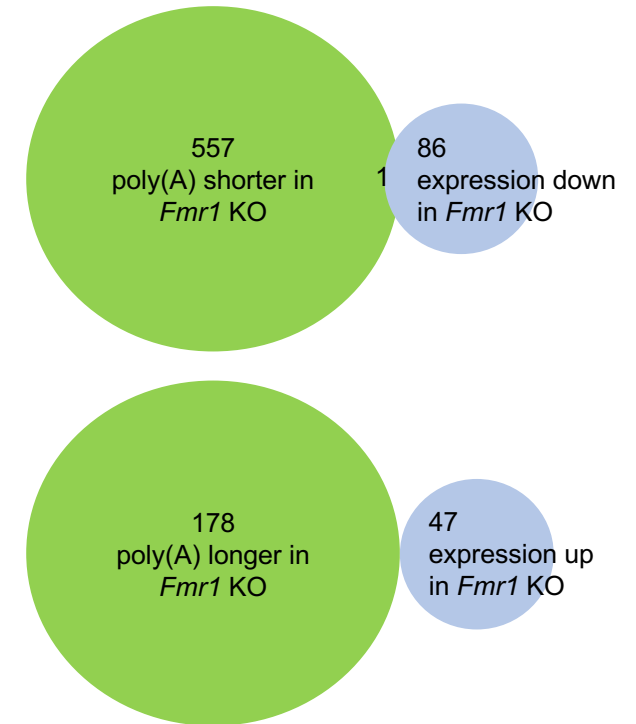

Supplement: Supplemental_Figures.pdf [file Supplemental_Figures.pdf]
