# Supplementary material
Source: HighWire-hosted journal article supplement (doi:10.1101/rna.079050.121)
Supplement: Supplemental_Figure_Legends.docx [file Supplemental_Figure_Legends.docx]

**Supplementary Figure legends**

**Supplemental Figure 1.** Gld4-interacting proteins. (A) Polyacrylamide gel of proteins co-immunoprecipitated with double-tagged Gld4 as well as a control co-immunoprecipitation in which was the same procedure was applied to cells that did not express tagged Gld4. The asterisks refer to visible protein bands different between the control and the sample. ** indicates a distinct band at the correct FLAG-GLD4 size (B) Table denoting Gld4-interacting RNA binding proteins, 12 of which have some localization to the cytoplasm.

**Supplemental Figure 2.** FMRP-RNA interactions.(A)Venn diagram of overlap of RNAs whose poly(A) tails are regulated upon *Fmr1* depletion with those that are CLIP’d by FMRP. Ascano et al (2012) used PAR-CLIP to identify 6882 RNAs bound by FMRP in HEK cells. These were compared to 51 RNAs whose poly(A) was regulated by *Fmr1* depletion, that had >100 sequence tags from TAIL-seq ,and that displayed long2FC of poly(A) lengths >0.25. 5379 RNAs from FMRP PAR-CLIP were also detected by TAIL-seq; 45 of these 5379 RNAs underwent changes in poly(A) upon *Fmr1* depletion (p<0.00001, Fisher’s exact test). (B) Western blot showing FMRP immunoprecipitation with FMRP antibody relative to IgG. (C) Histograms of RNAs whose poly(A) tails are regulated upon *Fmr1* depletion and that are co-precipitated with FMRP above background (IgG). (D) Histograms of RNAs whose poly(A) tails are regulated upon *Fmr1* depletion and but that are not co-precipitated with FMRP above background (IgG).

**Supplemental Figure 3.** Analysis of motif enrichment in 3’UTRs of mRNAs whose poly(A) tails are regulated upon *Fmr1* depletion as assessed by TA:IL-seq. The top 100 RNAs were assessed.

**Supplemental Figure 4**. Differential expression and polyadenylation of RNAs as detected by RNA sequencing. (A,B) The tables list the top 30 RNAs that undergo poly(A) tail size or abundance cahges in *Fmr1* KO brain cortex relative to control. (C) Venn diagrams showing little to no overlap of the RNAs that undergo poly(A) tail size changes or abundance in *Fmr1* KO brain cortex relative to control.
