# Supplementary material
Source: HighWire-hosted journal article supplement (doi:10.1101/rna.079050.121)
Supplement: Supplemental_Table_3.xlsx [file Supplemental_Table_3.xlsx]

## Sheet: Table1
Supplemental Table 3. Nanopore Sequencing Data
	KO1	KO2	KO3	WT1	WT2	WT3
raw reads (signal file)	7166476	4692000	6461568	6108000	7405780	7663137
total bp	7691204479	5570636261	7651147472	6728515489	8638303876	9341018094
N50	1662	1727	1749	1642	1745	1812
1d pass reads	5737867	3932000	5379070	5104000	6021628	6393987
1d pass max length	17690	23040	21168	16716	23040	23423
1d pass average length	1226.08585821177	1305.20543031536	1303.88297010449	1217.2986590909	1318.11734152292	1358.31359932386
1d pass average qscore	10.1952723660726	10.4133409774295	10.3097491472867	10.3359943557623	10.1547406505865	10.2185934958827

## Sheet: Raw results
transcript	Gene.ID	Gene.name	Gene.description	Transcript.length.including.UTRs.and.CDS	WT2	WT3	KO1	KO2	KO3	WT2_analyzed_reads	WT3_analyzed_reads	KO1_analyzed_reads	KO2_analyzed_reads	KO3_analyzed_reads
ENSMUST00000177564.1	ENSMUSG00000096176	Trdd2	T cell receptor delta diversity 2 [Source:MGI Symbol;Acc:MGI:4439546]	16	NA	NA	NA	NA	NA	0	0	0	0	0
ENSMUST00000196221.1	ENSMUSG00000096749	Trdd1	T cell receptor delta diversity 1 [Source:MGI Symbol;Acc:MGI:4439547]	9	NA	NA	NA	NA	NA	0	0	0	0	0
ENSMUST00000179664.1	ENSMUSG00000096749	Trdd1	T cell receptor delta diversity 1 [Source:MGI Symbol;Acc:MGI:4439547]	11	NA	NA	NA	NA	NA	0	0	0	0	0
ENSMUST00000178537.1	ENSMUSG00000095668	Trbd1	T cell receptor beta, D region 1 [Source:MGI Symbol;Acc:MGI:4439571]	12	NA	NA	NA	NA	NA	0	0	0	0	0
ENSMUST00000178862.1	ENSMUSG00000094569	Trbd2	T cell receptor beta, D region 2 [Source:MGI Symbol;Acc:MGI:4439727]	14	NA	NA	NA	NA	NA	0	0	0	0	0
ENSMUST00000179520.1	ENSMUSG00000094028	Ighd4-1	immunoglobulin heavy diversity 4-1 [Source:MGI Symbol;Acc:MGI:4439801]	11	NA	NA	NA	NA	NA	0	0	0	0	0
ENSMUST00000179883.1	ENSMUSG00000094552	Ighd3-2	immunoglobulin heavy diversity 3-2 [Source:MGI Symbol;Acc:MGI:4439707]	16	NA	NA	NA	NA	NA	0	0	0	0	0
ENSMUST00000195858.1	ENSMUSG00000096420	Ighd5-6	immunoglobulin heavy diversity 5-6 [Source:MGI Symbol;Acc:MGI:4937234]	10	NA	NA	NA	NA	NA	0	0	0	0	0
ENSMUST00000179932.1	ENSMUSG00000096420	Ighd5-6	immunoglobulin heavy diversity 5-6 [Source:MGI Symbol;Acc:MGI:4937234]	12	NA	NA	NA	NA	NA	0	0	0	0	0
ENSMUST00000180001.1	ENSMUSG00000095656	Ighd2-8	immunoglobulin heavy diversity 2-8 [Source:MGI Symbol;Acc:MGI:4439706]	17	NA	NA	NA	NA	NA	0	0	0	0	0
ENSMUST00000178815.1	ENSMUSG00000094957	Ighd5-5	immunoglobulin heavy diversity 5-5 [Source:MGI Symbol;Acc:MGI:4937334]	10	NA	NA	NA	NA	NA	0	0	0	0	0
ENSMUST00000177965.1	ENSMUSG00000094057	Ighd2-7	immunoglobulin heavy diversity 2-7 [Source:MGI Symbol;Acc:MGI:4439866]	17	NA	NA	NA	NA	NA	0	0	0	0	0
ENSMUST00000178909.1	ENSMUSG00000094268	Ighd5-8	immunoglobulin heavy diversity 5-8 [Source:MGI Symbol;Acc:MGI:4937171]	29	NA	NA	NA	NA	NA	0	0	0	0	0
ENSMUST00000177646.1	ENSMUSG00000096884	Ighd5-4	immunoglobulin heavy diversity 5-4 [Source:MGI Symbol;Acc:MGI:4937058]	10	NA	NA	NA	NA	NA	0	0	0	0	0
ENSMUST00000178230.1	ENSMUSG00000096250	Ighd2-6	immunoglobulin heavy diversity 2-6 [Source:MGI Symbol;Acc:MGI:4439865]	17	NA	NA	NA	NA	NA	0	0	0	0	0
ENSMUST00000178483.1	ENSMUSG00000095592	Ighd5-7	immunoglobulin heavy diversity 5-7 [Source:MGI Symbol;Acc:MGI:4936973]	29	NA	NA	NA	NA	NA	0	0	0	0	0
ENSMUST00000179262.1	ENSMUSG00000093876	Ighd5-3	immunoglobulin heavy diversity 5-3 [Source:MGI Symbol;Acc:MGI:4937297]	10	NA	NA	NA	NA	NA	0	0	0	0	0
ENSMUST00000178549.1	ENSMUSG00000095897	Ighd2-5	immunoglobulin heavy diversity 2-5 [Source:MGI Symbol;Acc:MGI:4439705]	17	NA	NA	NA	NA	NA	0	0	0	0	0
ENSMUST00000193012.1	ENSMUSG00000103203	Gm37327	predicted gene, 37327 [Source:MGI Symbol;Acc:MGI:5610555]	29	NA	NA	NA	NA	NA	0	0	0	0	0
ENSMUST00000179166.1	ENSMUSG00000096396	Ighd5-2	immunoglobulin heavy diversity 5-2 [Source:MGI Symbol;Acc:MGI:4936898]	10	NA	NA	NA	NA	NA	0	0	0	0	0
ENSMUST00000179560.1	ENSMUSG00000095444	Ighd2-4	immunoglobulin heavy diversity 2-4 [Source:MGI Symbol;Acc:MGI:4439709]	17	NA	NA	NA	NA	NA	0	0	0	0	0
ENSMUST00000177839.1	ENSMUSG00000096568	Ighd2-3	immunoglobulin heavy diversity 2-3 [Source:MGI Symbol;Acc:MGI:4439708]	17	NA	NA	NA	NA	NA	0	0	0	0	0
ENSMUST00000103439.1	ENSMUSG00000076630	Ighd1-1	immunoglobulin heavy diversity 1-1 [Source:MGI Symbol;Acc:MGI:4439871]	23	NA	NA	NA	NA	NA	0	0	0	0	0
ENSMUST00000180266.1	ENSMUSG00000093818	Ighd3-1	immunoglobulin heavy diversity 3-1 [Source:MGI Symbol;Acc:MGI:4439891]	17	NA	NA	NA	NA	NA	0	0	0	0	0
ENSMUST00000103441.1	ENSMUSG00000076632	Gm16968	predicted gene, 16968 [Source:MGI Symbol;Acc:MGI:4439892]	23	NA	NA	NA	NA	NA	0	0	0	0	0
ENSMUST00000103667.5	ENSMUSG00000076855	Trav16	T cell receptor alpha variable 16 [Source:MGI Symbol;Acc:MGI:3702130]	420	NA	NA	NA	NA	NA	0	0	0	0	0
ENSMUST00000180380.2	ENSMUSG00000094562	Trav13-4-dv7	T cell receptor alpha variable 13-4-DV7 [Source:MGI Symbol;Acc:MGI:3702151]	385	NA	NA	NA	NA	NA	0	0	0	0	0
ENSMUST00000184905.1	ENSMUSG00000094562	Trav13-4-dv7	T cell receptor alpha variable 13-4-DV7 [Source:MGI Symbol;Acc:MGI:3702151]	264	NA	NA	NA	NA	NA	0	0	0	0	0
ENSMUST00000103589.5	ENSMUSG00000094212	Trav14-3	T cell receptor alpha variable 14-3 [Source:MGI Symbol;Acc:MGI:3702149]	384	NA	NA	NA	NA	NA	0	0	0	0	0
ENSMUST00000103670.3	ENSMUSG00000076858	Trav3-4	T cell receptor alpha variable 3-4 [Source:MGI Symbol;Acc:MGI:2684925]	458	NA	NA	NA	NA	NA	0	0	0	0	0
ENSMUST00000103671.3	ENSMUSG00000087666	B230359F08Rik	RIKEN cDNA B230359F08 gene [Source:MGI Symbol;Acc:MGI:3026946]	426	NA	NA	NA	NA	NA	0	0	0	0	0
ENSMUST00000103672.8	ENSMUSG00000096397	Trav17	T cell receptor alpha variable 17 [Source:MGI Symbol;Acc:MGI:3702128]	341	NA	NA	NA	NA	NA	0	0	0	0	0
ENSMUST00000186545.1	ENSMUSG00000096397	Trav17	T cell receptor alpha variable 17 [Source:MGI Symbol;Acc:MGI:3702128]	338	NA	NA	NA	NA	NA	0	0	0	0	0
ENSMUST00000103673.10	ENSMUSG00000076861	Trav18	T cell receptor alpha variable 18 [Source:MGI Symbol;Acc:MGI:3649382]	328	NA	NA	NA	NA	NA	0	0	0	0	0
ENSMUST00000186573.1	ENSMUSG00000076861	Trav18	T cell receptor alpha variable 18 [Source:MGI Symbol;Acc:MGI:3649382]	325	NA	NA	NA	NA	NA	0	0	0	0	0
ENSMUST00000103674.5	ENSMUSG00000076862	Trav19	T cell receptor alpha variable 19 [Source:MGI Symbol;Acc:MGI:3649383]	446	NA	NA	NA	NA	NA	0	0	0	0	0
ENSMUST00000180938.2	ENSMUSG00000076863	Trav21-dv12	T cell receptor alpha variable 21-DV12 [Source:MGI Symbol;Acc:MGI:3652097]	360	NA	NA	NA	NA	NA	0	0	0	0	0
ENSMUST00000103676.8	ENSMUSG00000076864	Trdv1	T cell receptor delta variable 1 [Source:MGI Symbol;Acc:MGI:3649381]	337	NA	NA	NA	NA	NA	0	0	0	0	0
ENSMUST00000187163.1	ENSMUSG00000076864	Trdv1	T cell receptor delta variable 1 [Source:MGI Symbol;Acc:MGI:3649381]	334	NA	NA	NA	NA	NA	0	0	0	0	0
ENSMUST00000103678.3	ENSMUSG00000076866	Trdv2-2	T cell receptor delta variable 2-2 [Source:MGI Symbol;Acc:MGI:4819748]	397	NA	NA	NA	NA	NA	0	0	0	0	0
ENSMUST00000197130.4	ENSMUSG00000076865	Trdv2-1	T cell receptor delta variable 2-1 [Source:MGI Symbol;Acc:MGI:3642826]	348	NA	NA	NA	NA	NA	0	0	0	0	0
ENSMUST00000103677.2	ENSMUSG00000076865	Trdv2-1	T cell receptor delta variable 2-1 [Source:MGI Symbol;Acc:MGI:3642826]	345	NA	NA	NA	NA	NA	0	0	0	0	0
ENSMUST00000199137.1	ENSMUSG00000106289	Trav23	T cell receptor alpha variable 23 [Source:MGI Symbol;Acc:MGI:5009959]	347	NA	NA	NA	NA	NA	0	0	0	0	0
ENSMUST00000103679.2	ENSMUSG00000076867	Trdv4	T cell receptor delta variable 4 [Source:MGI Symbol;Acc:MGI:4887419]	444	NA	NA	NA	NA	NA	0	0	0	0	0
ENSMUST00000103685.2	ENSMUSG00000076873	Trdv5	T cell receptor delta variable 5 [Source:MGI Symbol;Acc:MGI:3704133]	438	NA	NA	NA	NA	NA	0	0	0	0	0
ENSMUST00000103567.5	ENSMUSG00000076758	Trav1	T cell receptor alpha variable 1 [Source:MGI Symbol;Acc:MGI:3651476]	371	NA	NA	NA	NA	NA	0	0	0	0	0
ENSMUST00000185651.1	ENSMUSG00000076758	Trav1	T cell receptor alpha variable 1 [Source:MGI Symbol;Acc:MGI:3651476]	329	NA	NA	NA	NA	NA	0	0	0	0	0
ENSMUST00000196939.1	ENSMUSG00000076759	Trav2	T cell receptor alpha variable 2 [Source:MGI Symbol;Acc:MGI:3642679]	423	NA	NA	NA	NA	NA	0	0	0	0	0
ENSMUST00000103568.2	ENSMUSG00000076759	Trav2	T cell receptor alpha variable 2 [Source:MGI Symbol;Acc:MGI:3642679]	325	NA	NA	NA	NA	NA	0	0	0	0	0
ENSMUST00000103569.2	ENSMUSG00000076760	Trav3-1	T cell receptor alpha variable 3-1 [Source:MGI Symbol;Acc:MGI:3644489]	385	NA	NA	NA	NA	NA	0	0	0	0	0
ENSMUST00000103570.1	ENSMUSG00000076761	Trav5-1	T cell receptor alpha variable 5-1 [Source:MGI Symbol;Acc:MGI:3815062]	343	NA	NA	NA	NA	NA	0	0	0	0	0
ENSMUST00000103571.1	ENSMUSG00000076762	Trav6-1	T cell receptor alpha variable 6-1 [Source:MGI Symbol;Acc:MGI:3644497]	338	NA	NA	NA	NA	NA	0	0	0	0	0
ENSMUST00000198019.1	ENSMUSG00000104620	Trav7-1	T cell receptor alpha variable 7-1 [Source:MGI Symbol;Acc:MGI:3647460]	337	NA	NA	NA	NA	NA	0	0	0	0	0
ENSMUST00000198058.1	ENSMUSG00000076764	Trav6-2	T cell receptor alpha variable 6-2 [Source:MGI Symbol;Acc:MGI:3642602]	341	NA	NA	NA	NA	NA	0	0	0	0	0
ENSMUST00000103573.2	ENSMUSG00000076764	Trav6-2	T cell receptor alpha variable 6-2 [Source:MGI Symbol;Acc:MGI:3642602]	338	NA	NA	NA	NA	NA	0	0	0	0	0
ENSMUST00000200127.1	ENSMUSG00000105533	Trav7d-2	T cell receptor alpha variable 7D-2 [Source:MGI Symbol;Acc:MGI:3711992]	337	NA	NA	NA	NA	NA	0	0	0	0	0
ENSMUST00000181483.2	ENSMUSG00000096600	Trav6d-3	T cell receptor alpha variable 6D-3 [Source:MGI Symbol;Acc:MGI:3650097]	347	NA	NA	NA	NA	NA	0	0	0	0	0
ENSMUST00000184883.1	ENSMUSG00000096600	Trav6d-3	T cell receptor alpha variable 6D-3 [Source:MGI Symbol;Acc:MGI:3650097]	308	NA	NA	NA	NA	NA	0	0	0	0	0
ENSMUST00000179789.3	ENSMUSG00000096746	Trav7d-3	T cell receptor alpha variable 7D-3 [Source:MGI Symbol;Acc:MGI:3649861]	402	NA	NA	NA	NA	NA	0	0	0	0	0
ENSMUST00000180717.2	ENSMUSG00000095387	Trav6d-4	T cell receptor alpha variable 6D-4 [Source:MGI Symbol;Acc:MGI:2685547]	378	NA	NA	NA	NA	NA	0	0	0	0	0
ENSMUST00000183820.1	ENSMUSG00000095387	Trav6d-4	T cell receptor alpha variable 6D-4 [Source:MGI Symbol;Acc:MGI:2685547]	338	NA	NA	NA	NA	NA	0	0	0	0	0
ENSMUST00000178768.3	ENSMUSG00000094023	Trav7d-4	T cell receptor alpha variable 7D-4 [Source:MGI Symbol;Acc:MGI:3651273]	451	NA	NA	NA	NA	NA	0	0	0	0	0
ENSMUST00000103580.3	ENSMUSG00000076770	Trav8d-1	T cell receptor alpha variable 8D-1 [Source:MGI Symbol;Acc:MGI:3650121]	400	NA	NA	NA	NA	NA	0	0	0	0	0
ENSMUST00000178426.3	ENSMUSG00000096478	Trav9d-1	T cell receptor alpha variable 9D-1 [Source:MGI Symbol;Acc:MGI:3650631]	337	NA	NA	NA	NA	NA	0	0	0	0	0
ENSMUST00000180687.2	ENSMUSG00000095426	Trav6d-5	T cell receptor alpha variable 6D-5 [Source:MGI Symbol;Acc:MGI:3649416]	338	NA	NA	NA	NA	NA	0	0	0	0	0
ENSMUST00000103646.4	ENSMUSG00000094792	Trav10d	T cell receptor alpha variable 10D [Source:MGI Symbol;Acc:MGI:5293417]	406	NA	NA	NA	NA	NA	0	0	0	0	0
ENSMUST00000197754.1	ENSMUSG00000094176	Trav6d-6	T cell receptor alpha variable 6D-6 [Source:MGI Symbol;Acc:MGI:2686066]	344	NA	NA	NA	NA	NA	0	0	0	0	0
ENSMUST00000103648.3	ENSMUSG00000095088	Trav11d	T cell receptor alpha variable 11D [Source:MGI Symbol;Acc:MGI:3649423]	342	NA	NA	NA	NA	NA	0	0	0	0	0
ENSMUST00000197128.1	ENSMUSG00000105393	Trav7d-5	T cell receptor alpha variable 7D-5 [Source:MGI Symbol;Acc:MGI:3649422]	340	NA	NA	NA	NA	NA	0	0	0	0	0
ENSMUST00000181360.2	ENSMUSG00000095689	Trav12d-1	T cell receptor alpha variable 12D-1 [Source:MGI Symbol;Acc:MGI:3649417]	436	NA	NA	NA	NA	NA	0	0	0	0	0
ENSMUST00000183652.1	ENSMUSG00000095689	Trav12d-1	T cell receptor alpha variable 12D-1 [Source:MGI Symbol;Acc:MGI:3649417]	344	NA	NA	NA	NA	NA	0	0	0	0	0
ENSMUST00000103588.3	ENSMUSG00000076778	Trav13d-1	T cell receptor alpha variable 13D-1 [Source:MGI Symbol;Acc:MGI:3652171]	396	NA	NA	NA	NA	NA	0	0	0	0	0
ENSMUST00000181038.2	ENSMUSG00000095854	Trav14d-1	T cell receptor alpha variable 14D-1 [Source:MGI Symbol;Acc:MGI:3651279]	415	NA	NA	NA	NA	NA	0	0	0	0	0
ENSMUST00000187138.1	ENSMUSG00000095854	Trav14d-1	T cell receptor alpha variable 14D-1 [Source:MGI Symbol;Acc:MGI:3651279]	340	NA	NA	NA	NA	NA	0	0	0	0	0
ENSMUST00000103616.4	ENSMUSG00000096653	Trav15d-1-dv6d-1	T cell receptor alpha variable 15D-1-DV6D-1 [Source:MGI Symbol;Acc:MGI:3651288]	418	NA	NA	NA	NA	NA	0	0	0	0	0
ENSMUST00000186370.1	ENSMUSG00000096653	Trav15d-1-dv6d-1	T cell receptor alpha variable 15D-1-DV6D-1 [Source:MGI Symbol;Acc:MGI:3651288]	349	NA	NA	NA	NA	NA	0	0	0	0	0
ENSMUST00000199746.4	ENSMUSG00000094914	Trav9d-2	T cell receptor alpha variable 9D-2 [Source:MGI Symbol;Acc:MGI:3704129]	340	NA	NA	NA	NA	NA	0	0	0	0	0
ENSMUST00000178824.1	ENSMUSG00000094914	Trav9d-2	T cell receptor alpha variable 9D-2 [Source:MGI Symbol;Acc:MGI:3704129]	337	NA	NA	NA	NA	NA	0	0	0	0	0
ENSMUST00000103592.1	ENSMUSG00000093939	Trav4d-3	T cell receptor alpha variable 4D-3 [Source:MGI Symbol;Acc:MGI:3782037]	331	NA	NA	NA	NA	NA	0	0	0	0	0
ENSMUST00000197007.1	ENSMUSG00000096129	Trav12d-2	T cell receptor alpha variable 12D-2 [Source:MGI Symbol;Acc:MGI:3642520]	454	NA	NA	NA	NA	NA	0	0	0	0	0
ENSMUST00000103593.2	ENSMUSG00000096129	Trav12d-2	T cell receptor alpha variable 12D-2 [Source:MGI Symbol;Acc:MGI:3642520]	341	NA	NA	NA	NA	NA	0	0	0	0	0
ENSMUST00000178252.2	ENSMUSG00000095495	Trav9d-3	T cell receptor alpha variable 9D-3 [Source:MGI Symbol;Acc:MGI:3780142]	575	NA	NA	NA	NA	NA	0	0	0	0	0
ENSMUST00000177703.2	ENSMUSG00000094607	Trav12d-3	T cell receptor alpha variable 12D-3 [Source:MGI Symbol;Acc:MGI:3704434]	347	NA	NA	NA	NA	NA	0	0	0	0	0
ENSMUST00000197954.1	ENSMUSG00000094758	Trav13d-2	T cell receptor alpha variable 13D-2 [Source:MGI Symbol;Acc:MGI:3643151]	331	NA	NA	NA	NA	NA	0	0	0	0	0
ENSMUST00000103596.2	ENSMUSG00000094758	Trav13d-2	T cell receptor alpha variable 13D-2 [Source:MGI Symbol;Acc:MGI:3643151]	264	NA	NA	NA	NA	NA	0	0	0	0	0
ENSMUST00000196802.1	ENSMUSG00000095560	Trav14d-2	T cell receptor alpha variable 14D-2 [Source:MGI Symbol;Acc:MGI:3646138]	464	NA	NA	NA	NA	NA	0	0	0	0	0
ENSMUST00000103597.2	ENSMUSG00000095560	Trav14d-2	T cell receptor alpha variable 14D-2 [Source:MGI Symbol;Acc:MGI:3646138]	276	NA	NA	NA	NA	NA	0	0	0	0	0
ENSMUST00000199800.1	ENSMUSG00000105953	Trav15d-2-dv6d-2	T cell receptor alpha variable 15D-2-DV6D-2 [Source:MGI Symbol;Acc:MGI:3800299]	398	NA	NA	NA	NA	NA	0	0	0	0	0
ENSMUST00000196023.1	ENSMUSG00000093953	Trav3d-3	T cell receptor alpha variable 3D-3 [Source:MGI Symbol;Acc:MGI:3782469]	427	NA	NA	NA	NA	NA	0	0	0	0	0
ENSMUST00000103599.2	ENSMUSG00000093953	Trav3d-3	T cell receptor alpha variable 3D-3 [Source:MGI Symbol;Acc:MGI:3782469]	276	NA	NA	NA	NA	NA	0	0	0	0	0
ENSMUST00000200548.1	ENSMUSG00000090868	Trav9d-4	T cell receptor alpha variable 9D-4 [Source:MGI Symbol;Acc:MGI:4889087]	565	NA	NA	NA	NA	NA	0	0	0	0	0
ENSMUST00000167409.1	ENSMUSG00000090868	Trav9d-4	T cell receptor alpha variable 9D-4 [Source:MGI Symbol;Acc:MGI:4889087]	307	NA	NA	NA	NA	NA	0	0	0	0	0
ENSMUST00000103600.2	ENSMUSG00000096505	Trav4d-4	T cell receptor alpha variable 4D-4 [Source:MGI Symbol;Acc:MGI:2684872]	354	NA	NA	NA	NA	NA	0	0	0	0	0
ENSMUST00000179701.1	ENSMUSG00000096106	Trav5d-4	T cell receptor alpha variable 5D-4 [Source:MGI Symbol;Acc:MGI:3704130]	343	NA	NA	NA	NA	NA	0	0	0	0	0
ENSMUST00000178650.2	ENSMUSG00000095756	Trav6d-7	T cell receptor alpha variable 6D-7 [Source:MGI Symbol;Acc:MGI:2686335]	358	NA	NA	NA	NA	NA	0	0	0	0	0
ENSMUST00000196756.1	ENSMUSG00000105721	C920008G01Rik	RIKEN cDNA C920008G01 gene [Source:MGI Symbol;Acc:MGI:2444626]	380	NA	NA	NA	NA	NA	0	0	0	0	0
ENSMUST00000179512.2	ENSMUSG00000095643	Trav13d-3	T cell receptor alpha variable 13D-3 [Source:MGI Symbol;Acc:MGI:5293419]	391	NA	NA	NA	NA	NA	0	0	0	0	0
ENSMUST00000198439.4	ENSMUSG00000076795	Trav8d-2	T cell receptor alpha variable 8D-2 [Source:MGI Symbol;Acc:MGI:3647760]	337	NA	NA	NA	NA	NA	0	0	0	0	0
ENSMUST00000103605.2	ENSMUSG00000076795	Trav8d-2	T cell receptor alpha variable 8D-2 [Source:MGI Symbol;Acc:MGI:3647760]	334	NA	NA	NA	NA	NA	0	0	0	0	0
ENSMUST00000103606.1	ENSMUSG00000076796	Trav16d-dv11	T cell receptor alpha variable 16D-DV11 [Source:MGI Symbol;Acc:MGI:3704436]	353	NA	NA	NA	NA	NA	0	0	0	0	0
ENSMUST00000196079.1	ENSMUSG00000096329	Trav13d-4	T cell receptor alpha variable 13D-4 [Source:MGI Symbol;Acc:MGI:4440515]	331	NA	NA	NA	NA	NA	0	0	0	0	0
ENSMUST00000103607.2	ENSMUSG00000096329	Trav13d-4	T cell receptor alpha variable 13D-4 [Source:MGI Symbol;Acc:MGI:4440515]	264	NA	NA	NA	NA	NA	0	0	0	0	0
ENSMUST00000103608.3	ENSMUSG00000094619	Trav14d-3-dv8	T cell receptor alpha variable 14D-3-DV8 [Source:MGI Symbol;Acc:MGI:3822547]	456	NA	NA	NA	NA	NA	0	0	0	0	0
ENSMUST00000103609.1	ENSMUSG00000095736	Trav7n-4	T cell receptor alpha variable 7N-4 [Source:MGI Symbol;Acc:MGI:3644878]	341	NA	NA	NA	NA	NA	0	0	0	0	0
ENSMUST00000103611.1	ENSMUSG00000076800	Trav6n-5	T cell receptor alpha variable 6N-5 [Source:MGI Symbol;Acc:MGI:3704437]	338	NA	NA	NA	NA	NA	0	0	0	0	0
ENSMUST00000103612.1	ENSMUSG00000095646	Trav10n	T cell receptor alpha variable 10N [Source:MGI Symbol;Acc:MGI:3647936]	343	NA	NA	NA	NA	NA	0	0	0	0	0
ENSMUST00000181793.2	ENSMUSG00000076802	Trav6n-6	T cell receptor alpha variable 6N-6 [Source:MGI Symbol;Acc:MGI:3642618]	365	NA	NA	NA	NA	NA	0	0	0	0	0
ENSMUST00000103613.2	ENSMUSG00000076802	Trav6n-6	T cell receptor alpha variable 6N-6 [Source:MGI Symbol;Acc:MGI:3642618]	287	NA	NA	NA	NA	NA	0	0	0	0	0
ENSMUST00000199753.1	ENSMUSG00000105629	Trav7n-5	T cell receptor alpha variable 7N-5 [Source:MGI Symbol;Acc:MGI:3644782]	340	NA	NA	NA	NA	NA	0	0	0	0	0
ENSMUST00000198682.1	ENSMUSG00000096055	Trav12n-1	T cell receptor alpha variable 12N-1 [Source:MGI Symbol;Acc:MGI:3782477]	436	NA	NA	NA	NA	NA	0	0	0	0	0
ENSMUST00000103587.3	ENSMUSG00000096055	Trav12n-1	T cell receptor alpha variable 12N-1 [Source:MGI Symbol;Acc:MGI:3782477]	344	NA	NA	NA	NA	NA	0	0	0	0	0
ENSMUST00000198359.1	ENSMUSG00000104629	Trav13n-1	T cell receptor alpha variable 13N-1 [Source:MGI Symbol;Acc:MGI:5009926]	331	NA	NA	NA	NA	NA	0	0	0	0	0
ENSMUST00000196639.1	ENSMUSG00000096827	Trav14n-1	T cell receptor alpha variable 14N-1 [Source:MGI Symbol;Acc:MGI:3642439]	415	NA	NA	NA	NA	NA	0	0	0	0	0
ENSMUST00000177578.1	ENSMUSG00000096827	Trav14n-1	T cell receptor alpha variable 14N-1 [Source:MGI Symbol;Acc:MGI:3642439]	340	NA	NA	NA	NA	NA	0	0	0	0	0
ENSMUST00000197433.4	ENSMUSG00000094413	Trav15n-1	T cell receptor alpha variable 15N-1 [Source:MGI Symbol;Acc:MGI:4439864]	352	NA	NA	NA	NA	NA	0	0	0	0	0
ENSMUST00000103590.3	ENSMUSG00000094413	Trav15n-1	T cell receptor alpha variable 15N-1 [Source:MGI Symbol;Acc:MGI:4439864]	349	NA	NA	NA	NA	NA	0	0	0	0	0
ENSMUST00000198913.4	ENSMUSG00000093813	Trav9n-2	T cell receptor alpha variable 9N-2 [Source:MGI Symbol;Acc:MGI:3704438]	340	NA	NA	NA	NA	NA	0	0	0	0	0
ENSMUST00000180097.1	ENSMUSG00000093813	Trav9n-2	T cell receptor alpha variable 9N-2 [Source:MGI Symbol;Acc:MGI:3704438]	337	NA	NA	NA	NA	NA	0	0	0	0	0
ENSMUST00000103618.1	ENSMUSG00000095572	Trav4n-3	T cell receptor alpha variable 4N-3 [Source:MGI Symbol;Acc:MGI:3782086]	331	NA	NA	NA	NA	NA	0	0	0	0	0
ENSMUST00000196674.1	ENSMUSG00000096531	Trav12n-2	T cell receptor alpha variable 12N-2 [Source:MGI Symbol;Acc:MGI:3644334]	454	NA	NA	NA	NA	NA	0	0	0	0	0
ENSMUST00000103619.2	ENSMUSG00000096531	Trav12n-2	T cell receptor alpha variable 12N-2 [Source:MGI Symbol;Acc:MGI:3644334]	341	NA	NA	NA	NA	NA	0	0	0	0	0
ENSMUST00000177705.2	ENSMUSG00000096541	Trav9n-3	T cell receptor alpha variable 9N-3 [Source:MGI Symbol;Acc:MGI:3782511]	575	NA	NA	NA	NA	NA	0	0	0	0	0
ENSMUST00000179583.2	ENSMUSG00000093915	Trav12n-3	T cell receptor alpha variable 12N-3 [Source:MGI Symbol;Acc:MGI:3704131]	353	NA	NA	NA	NA	NA	0	0	0	0	0
ENSMUST00000196941.1	ENSMUSG00000094779	Trav13n-2	T cell receptor alpha variable 13N-2 [Source:MGI Symbol;Acc:MGI:3642345]	331	NA	NA	NA	NA	NA	0	0	0	0	0
ENSMUST00000103622.2	ENSMUSG00000094779	Trav13n-2	T cell receptor alpha variable 13N-2 [Source:MGI Symbol;Acc:MGI:3642345]	264	NA	NA	NA	NA	NA	0	0	0	0	0
ENSMUST00000197614.1	ENSMUSG00000093801	Trav14n-2	T cell receptor alpha variable 14N-2 [Source:MGI Symbol;Acc:MGI:3645258]	464	NA	NA	NA	NA	NA	0	0	0	0	0
ENSMUST00000103623.2	ENSMUSG00000093801	Trav14n-2	T cell receptor alpha variable 14N-2 [Source:MGI Symbol;Acc:MGI:3645258]	276	NA	NA	NA	NA	NA	0	0	0	0	0
ENSMUST00000199112.1	ENSMUSG00000104915	Trav15n-2	T cell receptor alpha variable 15N-2 [Source:MGI Symbol;Acc:MGI:3649172]	398	NA	NA	NA	NA	NA	0	0	0	0	0
ENSMUST00000197557.1	ENSMUSG00000094877	Trav3n-3	T cell receptor alpha variable 3N-3 [Source:MGI Symbol;Acc:MGI:3782518]	427	NA	NA	NA	NA	NA	0	0	0	0	0
ENSMUST00000103625.2	ENSMUSG00000094877	Trav3n-3	T cell receptor alpha variable 3N-3 [Source:MGI Symbol;Acc:MGI:3782518]	276	NA	NA	NA	NA	NA	0	0	0	0	0
ENSMUST00000103626.2	ENSMUSG00000094231	Trav9n-4	T cell receptor alpha variable 9N-4 [Source:MGI Symbol;Acc:MGI:3583949]	595	NA	NA	NA	NA	NA	0	0	0	0	0
ENSMUST00000103627.2	ENSMUSG00000093969	Trav4n-4	T cell receptor alpha variable 4N-4 [Source:MGI Symbol;Acc:MGI:3704439]	354	NA	NA	NA	NA	NA	0	0	0	0	0
ENSMUST00000179997.1	ENSMUSG00000096168	Trav5n-4	T cell receptor alpha variable 5N-4 [Source:MGI Symbol;Acc:MGI:3704440]	343	NA	NA	NA	NA	NA	0	0	0	0	0
ENSMUST00000179607.2	ENSMUSG00000095370	Trav6n-7	T cell receptor alpha variable 6N-7 [Source:MGI Symbol;Acc:MGI:3704441]	358	NA	NA	NA	NA	NA	0	0	0	0	0
ENSMUST00000178100.2	ENSMUSG00000105080	Trav7n-6	T cell receptor alpha variable 7N-6 [Source:MGI Symbol;Acc:MGI:3704442]	381	NA	NA	NA	NA	NA	0	0	0	0	0
ENSMUST00000179580.2	ENSMUSG00000096038	Trav13n-3	T cell receptor alpha variable 13N-3 [Source:MGI Symbol;Acc:MGI:3645598]	337	NA	NA	NA	NA	NA	0	0	0	0	0
ENSMUST00000103632.3	ENSMUSG00000076821	Trav8n-2	T cell receptor alpha variable 8n-2 [Source:MGI Symbol;Acc:MGI:3641705]	408	NA	NA	NA	NA	NA	0	0	0	0	0
ENSMUST00000199280.1	ENSMUSG00000076822	Trav16n	T cell receptor alpha variable 16n [Source:MGI Symbol;Acc:MGI:4439761]	412	NA	NA	NA	NA	NA	0	0	0	0	0
ENSMUST00000103633.1	ENSMUSG00000076822	Trav16n	T cell receptor alpha variable 16n [Source:MGI Symbol;Acc:MGI:4439761]	353	NA	NA	NA	NA	NA	0	0	0	0	0
ENSMUST00000196105.1	ENSMUSG00000076823	Trav13n-4	T cell receptor alpha variable 13N-4 [Source:MGI Symbol;Acc:MGI:3642678]	432	NA	NA	NA	NA	NA	0	0	0	0	0
ENSMUST00000103634.2	ENSMUSG00000076823	Trav13n-4	T cell receptor alpha variable 13N-4 [Source:MGI Symbol;Acc:MGI:3642678]	267	NA	NA	NA	NA	NA	0	0	0	0	0
ENSMUST00000103652.4	ENSMUSG00000076824	Trav14n-3	T cell receptor alpha variable 14N-3 [Source:MGI Symbol;Acc:MGI:3584039]	361	NA	NA	NA	NA	NA	0	0	0	0	0
ENSMUST00000103635.2	ENSMUSG00000076824	Trav14n-3	T cell receptor alpha variable 14N-3 [Source:MGI Symbol;Acc:MGI:3584039]	280	NA	NA	NA	NA	NA	0	0	0	0	0
ENSMUST00000103636.3	ENSMUSG00000096417	Trav7-2	T cell receptor alpha variable 7-2 [Source:MGI Symbol;Acc:MGI:3649607]	336	NA	NA	NA	NA	NA	0	0	0	0	0
ENSMUST00000103637.5	ENSMUSG00000076826	Trav4-2	T cell receptor alpha variable 4-2 [Source:MGI Symbol;Acc:MGI:3649605]	370	NA	NA	NA	NA	NA	0	0	0	0	0
ENSMUST00000180549.2	ENSMUSG00000094220	Trav6-3	T cell receptor alpha variable 6-3 [Source:MGI Symbol;Acc:MGI:3649610]	388	NA	NA	NA	NA	NA	0	0	0	0	0
ENSMUST00000183604.1	ENSMUSG00000094220	Trav6-3	T cell receptor alpha variable 6-3 [Source:MGI Symbol;Acc:MGI:3649610]	305	NA	NA	NA	NA	NA	0	0	0	0	0
ENSMUST00000177622.3	ENSMUSG00000096908	Trav7-3	T cell receptor alpha variable 7-3 [Source:MGI Symbol;Acc:MGI:3649556]	402	NA	NA	NA	NA	NA	0	0	0	0	0
ENSMUST00000180711.2	ENSMUSG00000094468	Trav6-4	T cell receptor alpha variable 6-4 [Source:MGI Symbol;Acc:MGI:3702153]	378	NA	NA	NA	NA	NA	0	0	0	0	0
ENSMUST00000184650.1	ENSMUSG00000094468	Trav6-4	T cell receptor alpha variable 6-4 [Source:MGI Symbol;Acc:MGI:3702153]	338	NA	NA	NA	NA	NA	0	0	0	0	0
ENSMUST00000181728.2	ENSMUSG00000094766	Trav7-4	T cell receptor alpha variable 7-4 [Source:MGI Symbol;Acc:MGI:3649611]	451	NA	NA	NA	NA	NA	0	0	0	0	0
ENSMUST00000103643.3	ENSMUSG00000076831	Trav8-1	T cell receptor alpha variable 8-1 [Source:MGI Symbol;Acc:MGI:3649608]	328	NA	NA	NA	NA	NA	0	0	0	0	0
ENSMUST00000103581.5	ENSMUSG00000096900	Trav9-1	T cell receptor alpha variable 9-1 [Source:MGI Symbol;Acc:MGI:3650356]	398	NA	NA	NA	NA	NA	0	0	0	0	0
ENSMUST00000181210.2	ENSMUSG00000096149	Trav6-5	T cell receptor alpha variable 6-5 [Source:MGI Symbol;Acc:MGI:3649609]	375	NA	NA	NA	NA	NA	0	0	0	0	0
ENSMUST00000183488.1	ENSMUSG00000096149	Trav6-5	T cell receptor alpha variable 6-5 [Source:MGI Symbol;Acc:MGI:3649609]	335	NA	NA	NA	NA	NA	0	0	0	0	0
ENSMUST00000103583.4	ENSMUSG00000096551	Trav10	T cell receptor alpha variable 10 [Source:MGI Symbol;Acc:MGI:3704132]	406	NA	NA	NA	NA	NA	0	0	0	0	0
ENSMUST00000103584.3	ENSMUSG00000095862	Trav6-6	T cell receptor alpha variable 6-6 [Source:MGI Symbol;Acc:MGI:4439905]	344	NA	NA	NA	NA	NA	0	0	0	0	0
ENSMUST00000103585.3	ENSMUSG00000096615	Trav11	T cell receptor alpha variable 11 [Source:MGI Symbol;Acc:MGI:3642163]	343	NA	NA	NA	NA	NA	0	0	0	0	0
ENSMUST00000200609.1	ENSMUSG00000106620	Trav7-5	T cell receptor alpha variable 7-5 [Source:MGI Symbol;Acc:MGI:3648929]	337	NA	NA	NA	NA	NA	0	0	0	0	0
ENSMUST00000200115.1	ENSMUSG00000096825	Trav12-1	T cell receptor alpha variable 12-1 [Source:MGI Symbol;Acc:MGI:4440525]	416	NA	NA	NA	NA	NA	0	0	0	0	0
ENSMUST00000103650.2	ENSMUSG00000096825	Trav12-1	T cell receptor alpha variable 12-1 [Source:MGI Symbol;Acc:MGI:4440525]	344	NA	NA	NA	NA	NA	0	0	0	0	0
ENSMUST00000103651.3	ENSMUSG00000076839	Trav13-1	T cell receptor alpha variable 13-1 [Source:MGI Symbol;Acc:MGI:4439904]	331	NA	NA	NA	NA	NA	0	0	0	0	0
ENSMUST00000198297.1	ENSMUSG00000076840	Trav14-1	T cell receptor alpha variable 14-1 [Source:MGI Symbol;Acc:MGI:3646773]	399	NA	NA	NA	NA	NA	0	0	0	0	0
ENSMUST00000200101.1	ENSMUSG00000094016	Trav15-1-dv6-1	T cell receptor alpha variable 15-1-DV6-1 [Source:MGI Symbol;Acc:MGI:4439369]	396	NA	NA	NA	NA	NA	0	0	0	0	0
ENSMUST00000103653.2	ENSMUSG00000094016	Trav15-1-dv6-1	T cell receptor alpha variable 15-1-DV6-1 [Source:MGI Symbol;Acc:MGI:4439369]	349	NA	NA	NA	NA	NA	0	0	0	0	0
ENSMUST00000103641.5	ENSMUSG00000096138	Trav7-6	T cell receptor alpha variable 7-6 [Source:MGI Symbol;Acc:MGI:3702133]	381	NA	NA	NA	NA	NA	0	0	0	0	0
ENSMUST00000184687.1	ENSMUSG00000096138	Trav7-6	T cell receptor alpha variable 7-6 [Source:MGI Symbol;Acc:MGI:3702133]	275	NA	NA	NA	NA	NA	0	0	0	0	0
ENSMUST00000103638.5	ENSMUSG00000095126	Trav6-7-dv9	T cell receptor alpha variable 6-7-DV9 [Source:MGI Symbol;Acc:MGI:3702143]	379	NA	NA	NA	NA	NA	0	0	0	0	0
ENSMUST00000103664.5	ENSMUSG00000095607	Trav5-4	T cell receptor alpha variable 5-4 [Source:MGI Symbol;Acc:MGI:1196221]	343	NA	NA	NA	NA	NA	0	0	0	0	0
ENSMUST00000103654.2	ENSMUSG00000094966	Trav9-2	T cell receptor alpha variable 9-2 [Source:MGI Symbol;Acc:MGI:4439903]	563	NA	NA	NA	NA	NA	0	0	0	0	0
ENSMUST00000103655.2	ENSMUSG00000093966	Trav4-3	T cell receptor alpha variable 4-3 [Source:MGI Symbol;Acc:MGI:4440478]	411	NA	NA	NA	NA	NA	0	0	0	0	0
ENSMUST00000180972.2	ENSMUSG00000096656	Trav12-2	T cell receptor alpha variable 12-2 [Source:MGI Symbol;Acc:MGI:5293447]	426	NA	NA	NA	NA	NA	0	0	0	0	0
ENSMUST00000103657.5	ENSMUSG00000095958	Trav12-3	T cell receptor alpha variable 12-3 [Source:MGI Symbol;Acc:MGI:3648633]	442	NA	NA	NA	NA	NA	0	0	0	0	0
ENSMUST00000103658.3	ENSMUSG00000076846	Trav13-2	T cell receptor alpha variable 13-2 [Source:MGI Symbol;Acc:MGI:3651611]	390	NA	NA	NA	NA	NA	0	0	0	0	0
ENSMUST00000179267.3	ENSMUSG00000095711	Trav14-2	T cell receptor alpha variable 14-2 [Source:MGI Symbol;Acc:MGI:3649206]	387	NA	NA	NA	NA	NA	0	0	0	0	0
ENSMUST00000184874.1	ENSMUSG00000095711	Trav14-2	T cell receptor alpha variable 14-2 [Source:MGI Symbol;Acc:MGI:3649206]	276	NA	NA	NA	NA	NA	0	0	0	0	0
ENSMUST00000103660.3	ENSMUSG00000076848	Trav15-2-dv6-2	T cell receptor alpha variable 15-2-DV6-2 [Source:MGI Symbol;Acc:MGI:3702147]	370	NA	NA	NA	NA	NA	0	0	0	0	0
ENSMUST00000181768.2	ENSMUSG00000094828	Trav3-3	T cell receptor alpha variable 3-3 [Source:MGI Symbol;Acc:MGI:3702145]	419	NA	NA	NA	NA	NA	0	0	0	0	0
ENSMUST00000183835.1	ENSMUSG00000094828	Trav3-3	T cell receptor alpha variable 3-3 [Source:MGI Symbol;Acc:MGI:3702145]	276	NA	NA	NA	NA	NA	0	0	0	0	0
ENSMUST00000103662.5	ENSMUSG00000096678	Trav9-4	T cell receptor alpha variable 9-4 [Source:MGI Symbol;Acc:MGI:3702135]	395	NA	NA	NA	NA	NA	0	0	0	0	0
ENSMUST00000103663.5	ENSMUSG00000096096	Trav4-4-dv10	T cell receptor alpha variable 4-4-DV10 [Source:MGI Symbol;Acc:MGI:3702138]	361	NA	NA	NA	NA	NA	0	0	0	0	0
ENSMUST00000198330.1	ENSMUSG00000076746	Tcrg-V6	T cell receptor gamma, variable 6 [Source:MGI Symbol;Acc:MGI:98636]	376	NA	NA	NA	NA	NA	0	0	0	0	0
ENSMUST00000103555.2	ENSMUSG00000076746	Tcrg-V6	T cell receptor gamma, variable 6 [Source:MGI Symbol;Acc:MGI:98636]	403	NA	NA	NA	NA	NA	0	0	0	0	0
ENSMUST00000103554.4	ENSMUSG00000076745	Tcrg-V4	T cell receptor gamma, variable 4 [Source:MGI Symbol;Acc:MGI:98634]	426	NA	NA	NA	NA	NA	0	0	0	0	0
ENSMUST00000103553.2	ENSMUSG00000076744	Tcrg-V7	T cell receptor gamma, variable 7 [Source:MGI Symbol;Acc:MGI:98637]	368	NA	NA	NA	NA	NA	0	0	0	0	0
ENSMUST00000199017.1	ENSMUSG00000076747	Tcrg-V5	T cell receptor gamma, variable 5 [Source:MGI Symbol;Acc:MGI:98635]	341	NA	NA	NA	NA	NA	0	0	0	0	0
ENSMUST00000103556.2	ENSMUSG00000076747	Tcrg-V5	T cell receptor gamma, variable 5 [Source:MGI Symbol;Acc:MGI:98635]	293	NA	NA	NA	NA	NA	0	0	0	0	0
ENSMUST00000198663.4	ENSMUSG00000076750	Tcrg-V3	T cell receptor gamma, variable 3 [Source:MGI Symbol;Acc:MGI:98633]	353	NA	NA	NA	NA	NA	0	0	0	0	0
ENSMUST00000103559.2	ENSMUSG00000076750	Tcrg-V3	T cell receptor gamma, variable 3 [Source:MGI Symbol;Acc:MGI:98633]	350	NA	NA	NA	NA	NA	0	0	0	0	0
ENSMUST00000103563.2	ENSMUSG00000076754	Trgv2	T cell receptor gamma variable 2 [Source:MGI Symbol;Acc:MGI:98632]	491	NA	NA	NA	NA	NA	0	0	0	0	0
ENSMUST00000103564.2	ENSMUSG00000076755	Tcrg-V1	T cell receptor gamma, variable 1 [Source:MGI Symbol;Acc:MGI:98631]	374	NA	NA	NA	NA	NA	0	0	0	0	0
ENSMUST00000193003.1	ENSMUSG00000076499	Trbv31	T cell receptor beta, variable 31 [Source:MGI Symbol;Acc:MGI:98588]	416	NA	NA	NA	NA	NA	0	0	0	0	0
ENSMUST00000103300.2	ENSMUSG00000076499	Trbv31	T cell receptor beta, variable 31 [Source:MGI Symbol;Acc:MGI:98588]	334	NA	NA	NA	NA	NA	0	0	0	0	0
ENSMUST00000191646.5	ENSMUSG00000076481	Trbv30	T cell receptor beta, variable 30 [Source:MGI Symbol;Acc:MGI:98592]	335	NA	NA	NA	NA	NA	0	0	0	0	0
ENSMUST00000103282.2	ENSMUSG00000076481	Trbv30	T cell receptor beta, variable 30 [Source:MGI Symbol;Acc:MGI:98592]	332	NA	NA	NA	NA	NA	0	0	0	0	0
ENSMUST00000103281.2	ENSMUSG00000076480	Trbv29	T cell receptor beta, variable 29 [Source:MGI Symbol;Acc:MGI:98605]	353	NA	NA	NA	NA	NA	0	0	0	0	0
ENSMUST00000103263.2	ENSMUSG00000076462	Trbv2	T cell receptor beta, variable 2 [Source:MGI Symbol;Acc:MGI:98599]	560	NA	NA	NA	NA	NA	0	0	0	0	0
ENSMUST00000103264.2	ENSMUSG00000076463	Trbv3	T cell receptor beta, variable 3 [Source:MGI Symbol;Acc:MGI:98590]	455	NA	NA	NA	NA	NA	0	0	0	0	0
ENSMUST00000103265.4	ENSMUSG00000107486	Trbv4	T cell receptor beta, variable 10 [Source:MGI Symbol;Acc:MGI:98584]	393	NA	NA	NA	NA	NA	0	0	0	0	0
ENSMUST00000103266.2	ENSMUSG00000076465	Trbv5	T cell receptor beta, variable 5 [Source:MGI Symbol;Acc:MGI:98583]	368	NA	NA	NA	NA	NA	0	0	0	0	0
ENSMUST00000103267.2	ENSMUSG00000095574	Trbv12-1	T cell receptor beta, variable 12-1 [Source:MGI Symbol;Acc:MGI:98602]	389	NA	NA	NA	NA	NA	0	0	0	0	0
ENSMUST00000194399.1	ENSMUSG00000076467	Trbv13-1	T cell receptor beta, variable 13-1 [Source:MGI Symbol;Acc:MGI:98609]	366	NA	NA	NA	NA	NA	0	0	0	0	0
ENSMUST00000103268.2	ENSMUSG00000076467	Trbv13-1	T cell receptor beta, variable 13-1 [Source:MGI Symbol;Acc:MGI:98609]	334	NA	NA	NA	NA	NA	0	0	0	0	0
ENSMUST00000103269.2	ENSMUSG00000094525	Trbv12-2	T cell receptor beta, variable 12-2 [Source:MGI Symbol;Acc:MGI:98601]	385	NA	NA	NA	NA	NA	0	0	0	0	0
ENSMUST00000103270.3	ENSMUSG00000076469	Trbv13-2	T cell receptor beta, variable 13-2 [Source:MGI Symbol;Acc:MGI:98608]	340	NA	NA	NA	NA	NA	0	0	0	0	0
ENSMUST00000103271.1	ENSMUSG00000076470	Trbv13-3	T cell receptor beta, variable 13-3 [Source:MGI Symbol;Acc:MGI:98607]	340	NA	NA	NA	NA	NA	0	0	0	0	0
ENSMUST00000103272.3	ENSMUSG00000076471	Trbv14	T cell receptor beta, variable 14 [Source:MGI Symbol;Acc:MGI:98587]	368	NA	NA	NA	NA	NA	0	0	0	0	0
ENSMUST00000103273.2	ENSMUSG00000076472	Trbv15	T cell receptor beta, variable 15 [Source:MGI Symbol;Acc:MGI:98586]	370	NA	NA	NA	NA	NA	0	0	0	0	0
ENSMUST00000103274.3	ENSMUSG00000076473	Trbv16	T cell receptor beta, variable 16 [Source:MGI Symbol;Acc:MGI:98585]	398	NA	NA	NA	NA	NA	0	0	0	0	0
ENSMUST00000103275.3	ENSMUSG00000076474	Trbv17	T cell receptor beta, variable 17 [Source:MGI Symbol;Acc:MGI:98610]	374	NA	NA	NA	NA	NA	0	0	0	0	0
ENSMUST00000103276.2	ENSMUSG00000076475	Trbv19	T cell receptor beta, variable 19 [Source:MGI Symbol;Acc:MGI:98604]	566	NA	NA	NA	NA	NA	0	0	0	0	0
ENSMUST00000103277.1	ENSMUSG00000076476	Trbv20	T cell receptor beta, variable 20 [Source:MGI Symbol;Acc:MGI:98589]	335	NA	NA	NA	NA	NA	0	0	0	0	0
ENSMUST00000195087.1	ENSMUSG00000076477	Trbv21	T cell receptor beta, variable 21 [Source:MGI Symbol;Acc:MGI:98593]	381	NA	NA	NA	NA	NA	0	0	0	0	0
ENSMUST00000103278.2	ENSMUSG00000076477	Trbv21	T cell receptor beta, variable 21 [Source:MGI Symbol;Acc:MGI:98593]	290	NA	NA	NA	NA	NA	0	0	0	0	0
ENSMUST00000193997.5	ENSMUSG00000076478	Trbv23	T cell receptor beta, variable V23 [Source:MGI Symbol;Acc:MGI:98595]	347	NA	NA	NA	NA	NA	0	0	0	0	0
ENSMUST00000103279.2	ENSMUSG00000076478	Trbv23	T cell receptor beta, variable V23 [Source:MGI Symbol;Acc:MGI:98595]	344	NA	NA	NA	NA	NA	0	0	0	0	0
ENSMUST00000193064.1	ENSMUSG00000076479	Trbv26	T cell receptor beta, variable 26 [Source:MGI Symbol;Acc:MGI:98596]	367	NA	NA	NA	NA	NA	0	0	0	0	0
ENSMUST00000103280.2	ENSMUSG00000076479	Trbv26	T cell receptor beta, variable 26 [Source:MGI Symbol;Acc:MGI:98596]	344	NA	NA	NA	NA	NA	0	0	0	0	0
ENSMUST00000103262.2	ENSMUSG00000076461	Trbv1	T cell receptor beta, variable 1 [Source:MGI Symbol;Acc:MGI:98594]	417	NA	NA	NA	NA	NA	0	0	0	0	0
ENSMUST00000174625.7	ENSMUSG00000079491	H2-T10	histocompatibility 2, T region locus 10 [Source:MGI Symbol;Acc:MGI:95942]	3389	321.5	248	NA	NA	63	2	2	0	0	1
ENSMUST00000174382.7	ENSMUSG00000079491	H2-T10	histocompatibility 2, T region locus 10 [Source:MGI Symbol;Acc:MGI:95942]	1699	92	81	143	NA	NA	2	1	4	0	0
ENSMUST00000166442.2	ENSMUSG00000079491	H2-T10	histocompatibility 2, T region locus 10 [Source:MGI Symbol;Acc:MGI:95942]	1481	216	194.5	36	65	252	1	2	1	1	1
ENSMUST00000134773.3	ENSMUSG00000061246	Olfr387-ps1	olfactory receptor 387, pseudogene 1 [Source:MGI Symbol;Acc:MGI:3030221]	1513	NA	NA	NA	NA	NA	0	0	0	0	0
ENSMUST00000118336.3	ENSMUSG00000080781	Olfr388-ps1	olfactory receptor 388, pseudogene 1 [Source:MGI Symbol;Acc:MGI:3030222]	2129	NA	NA	NA	NA	NA	0	0	0	0	0
ENSMUST00000208175.1	ENSMUSG00000109389	Olfr1300-ps1	olfactory receptor 1300, pseudogene 1 [Source:MGI Symbol;Acc:MGI:3031134]	2235	NA	NA	NA	NA	NA	0	0	0	0	0
ENSMUST00000182120.1	ENSMUSG00000097993	Ptprv	protein tyrosine phosphatase, receptor type, V [Source:MGI Symbol;Acc:MGI:108027]	717	NA	NA	264	NA	NA	0	0	2	0	0
ENSMUST00000183317.7	ENSMUSG00000097993	Ptprv	protein tyrosine phosphatase, receptor type, V [Source:MGI Symbol;Acc:MGI:108027]	6108	427	327	365.5	346	243	2	4	2	1	1
ENSMUST00000182570.1	ENSMUSG00000097993	Ptprv	protein tyrosine phosphatase, receptor type, V [Source:MGI Symbol;Acc:MGI:108027]	446	NA	NA	NA	NA	NA	0	0	0	0	0
ENSMUST00000182012.1	ENSMUSG00000097993	Ptprv	protein tyrosine phosphatase, receptor type, V [Source:MGI Symbol;Acc:MGI:108027]	241	NA	NA	NA	NA	NA	0	0	0	0	0
ENSMUST00000183089.1	ENSMUSG00000097993	Ptprv	protein tyrosine phosphatase, receptor type, V [Source:MGI Symbol;Acc:MGI:108027]	359	NA	NA	NA	NA	NA	0	0	0	0	0
ENSMUST00000182718.1	ENSMUSG00000097993	Ptprv	protein tyrosine phosphatase, receptor type, V [Source:MGI Symbol;Acc:MGI:108027]	593	NA	NA	NA	NA	NA	0	0	0	0	0
ENSMUST00000182541.7	ENSMUSG00000097993	Ptprv	protein tyrosine phosphatase, receptor type, V [Source:MGI Symbol;Acc:MGI:108027]	404	NA	NA	NA	NA	NA	0	0	0	0	0
ENSMUST00000182387.1	ENSMUSG00000097993	Ptprv	protein tyrosine phosphatase, receptor type, V [Source:MGI Symbol;Acc:MGI:108027]	375	NA	NA	NA	NA	NA	0	0	0	0	0
ENSMUST00000183328.1	ENSMUSG00000097993	Ptprv	protein tyrosine phosphatase, receptor type, V [Source:MGI Symbol;Acc:MGI:108027]	374	NA	NA	NA	NA	NA	0	0	0	0	0
ENSMUST00000183212.1	ENSMUSG00000097993	Ptprv	protein tyrosine phosphatase, receptor type, V [Source:MGI Symbol;Acc:MGI:108027]	362	NA	NA	NA	NA	NA	0	0	0	0	0
ENSMUST00000086432.6	ENSMUSG00000097993	Ptprv	protein tyrosine phosphatase, receptor type, V [Source:MGI Symbol;Acc:MGI:108027]	291	NA	NA	NA	NA	NA	0	0	0	0	0
ENSMUST00000126664.7	ENSMUSG00000046808	Atp10d	ATPase, class V, type 10D [Source:MGI Symbol;Acc:MGI:2450125]	6052	217	276	367.5	226	244.666666666666	4	3	2	2	3
ENSMUST00000156937.1	ENSMUSG00000046808	Atp10d	ATPase, class V, type 10D [Source:MGI Symbol;Acc:MGI:2450125]	2191	NA	NA	NA	NA	NA	0	0	0	0	0
ENSMUST00000136350.7	ENSMUSG00000046808	Atp10d	ATPase, class V, type 10D [Source:MGI Symbol;Acc:MGI:2450125]	3488	153	208	NA	NA	NA	1	3	0	0	0
ENSMUST00000146393.7	ENSMUSG00000046808	Atp10d	ATPase, class V, type 10D [Source:MGI Symbol;Acc:MGI:2450125]	2484	NA	NA	NA	NA	NA	0	0	0	0	0
ENSMUST00000169617.2	ENSMUSG00000046808	Atp10d	ATPase, class V, type 10D [Source:MGI Symbol;Acc:MGI:2450125]	761	NA	NA	NA	NA	NA	0	0	0	0	0
ENSMUST00000094710.7	ENSMUSG00000046808	Atp10d	ATPase, class V, type 10D [Source:MGI Symbol;Acc:MGI:2450125]	2365	NA	NA	NA	NA	NA	0	0	0	0	0
ENSMUST00000177481.3	ENSMUSG00000093533	Vmn2r-ps119	vomeronasal 2, receptor, pseudogene 119 [Source:MGI Symbol;Acc:MGI:3761537]	2573	NA	NA	NA	NA	NA	0	0	0	0	0
ENSMUST00000096114.12	ENSMUSG00000071573	Rnls	renalase, FAD-dependent amine oxidase [Source:MGI Symbol;Acc:MGI:1915045]	1597	107	65	137	199.666666666666	39.5	2	1	3	3	2
ENSMUST00000163093.1	ENSMUSG00000071573	Rnls	renalase, FAD-dependent amine oxidase [Source:MGI Symbol;Acc:MGI:1915045]	1378	182.923076923076	154.833333333333	167.5	154	139.571428571428	13	6	6	3	7
ENSMUST00000143750.3	ENSMUSG00000108605	Olfr396-ps1	olfactory receptor 396, pseudogene 1 [Source:MGI Symbol;Acc:MGI:3030230]	1675	NA	NA	NA	NA	NA	0	0	0	0	0
ENSMUST00000205791.1	ENSMUSG00000108605	Olfr396-ps1	olfactory receptor 396, pseudogene 1 [Source:MGI Symbol;Acc:MGI:3030230]	633	NA	NA	NA	NA	NA	0	0	0	0	0
ENSMUST00000194951.1	ENSMUSG00000092572	Serpinb10	serine (or cysteine) peptidase inhibitor, clade B (ovalbumin), member 10 [Source:MGI Symbol;Acc:MGI:2138648]	1194	NA	NA	NA	NA	NA	0	0	0	0	0
ENSMUST00000172762.1	ENSMUSG00000092572	Serpinb10	serine (or cysteine) peptidase inhibitor, clade B (ovalbumin), member 10 [Source:MGI Symbol;Acc:MGI:2138648]	3466	NA	122	NA	NA	NA	0	1	0	0	0
ENSMUST00000182198.7	ENSMUSG00000092572	Serpinb10	serine (or cysteine) peptidase inhibitor, clade B (ovalbumin), member 10 [Source:MGI Symbol;Acc:MGI:2138648]	1265	NA	NA	NA	NA	NA	0	0	0	0	0
ENSMUST00000115991.3	ENSMUSG00000079875	Olfr22-ps1	olfactory receptor 22, pseudogene 1 [Source:MGI Symbol;Acc:MGI:109313]	1237	NA	NA	NA	NA	NA	0	0	0	0	0
ENSMUST00000195764.1	ENSMUSG00000103081	Pcdhgb8	protocadherin gamma subfamily B, 8 [Source:MGI Symbol;Acc:MGI:1935200]	4615	141.696969696969	151.833333333333	139	142.6	163.275862068965	33	24	27	15	29
ENSMUST00000208907.1	ENSMUSG00000103081	Pcdhgb8	protocadherin gamma subfamily B, 8 [Source:MGI Symbol;Acc:MGI:1935200]	2796	NA	NA	NA	NA	NA	0	0	0	0	0
ENSMUST00000121340.1	ENSMUSG00000111566	Olfr1001-ps1	olfactory receptor 1001, pseudogene 1 [Source:MGI Symbol;Acc:MGI:3030835]	945	NA	NA	NA	NA	NA	0	0	0	0	0
ENSMUST00000216831.2	ENSMUSG00000110879	Olfr1010	olfactory receptor 1010 [Source:MGI Symbol;Acc:MGI:3030844]	1270	NA	NA	NA	NA	NA	0	0	0	0	0
ENSMUST00000121065.2	ENSMUSG00000083188	Olfr404-ps1	olfactory receptor 404, pseudogene 1 [Source:MGI Symbol;Acc:MGI:3030238]	972	NA	NA	NA	NA	NA	0	0	0	0	0
ENSMUST00000118809.2	ENSMUSG00000083886	Olfr409-ps1	olfactory receptor 409, pseudogene 1 [Source:MGI Symbol;Acc:MGI:3030243]	971	NA	NA	NA	NA	NA	0	0	0	0	0
ENSMUST00000121914.2	ENSMUSG00000082754	Olfr1021-ps1	olfactory receptor 1021, pseudogene 1 [Source:MGI Symbol;Acc:MGI:3030855]	1042	NA	NA	NA	NA	NA	0	0	0	0	0
ENSMUST00000117982.1	ENSMUSG00000075126	Olfr475-ps1	olfactory receptor 475, pseudogene 1 [Source:MGI Symbol;Acc:MGI:3030309]	932	NA	NA	NA	NA	NA	0	0	0	0	0
ENSMUST00000119267.1	ENSMUSG00000080751	Olfr634-ps1	olfactory receptor 634, pseudogene 1 [Source:MGI Symbol;Acc:MGI:3030468]	955	NA	NA	NA	NA	NA	0	0	0	0	0
ENSMUST00000217577.1	ENSMUSG00000111660	Olfr964-ps1	olfactory receptor 964, pseudogene 1 [Source:MGI Symbol;Acc:MGI:3030798]	914	NA	NA	NA	NA	NA	0	0	0	0	0
ENSMUST00000100960.10	ENSMUSG00000092021	Gbp11	guanylate binding protein 11 [Source:MGI Symbol;Acc:MGI:3646307]	2692	NA	350	275	298	NA	0	1	1	1	0
ENSMUST00000171587.1	ENSMUSG00000092021	Gbp11	guanylate binding protein 11 [Source:MGI Symbol;Acc:MGI:3646307]	1329	NA	NA	NA	NA	NA	0	0	0	0	0
ENSMUST00000208970.2	ENSMUSG00000090556	Olfr753-ps1	olfactory receptor 753, pseudogene 1 [Source:MGI Symbol;Acc:MGI:3030587]	2764	NA	NA	NA	NA	NA	0	0	0	0	0
ENSMUST00000219487.1	ENSMUSG00000090556	Olfr753-ps1	olfactory receptor 753, pseudogene 1 [Source:MGI Symbol;Acc:MGI:3030587]	2956	NA	NA	NA	NA	NA	0	0	0	0	0
ENSMUST00000174025.2	ENSMUSG00000090556	Olfr753-ps1	olfactory receptor 753, pseudogene 1 [Source:MGI Symbol;Acc:MGI:3030587]	3121	NA	NA	NA	NA	NA	0	0	0	0	0
ENSMUST00000174673.2	ENSMUSG00000090556	Olfr753-ps1	olfactory receptor 753, pseudogene 1 [Source:MGI Symbol;Acc:MGI:3030587]	919	NA	NA	NA	NA	NA	0	0	0	0	0
ENSMUST00000174262.3	ENSMUSG00000092401	Olfr300-ps1	olfactory receptor 300, pseudogene 1 [Source:MGI Symbol;Acc:MGI:3030134]	2395	NA	NA	NA	NA	NA	0	0	0	0	0
ENSMUST00000173904.3	ENSMUSG00000092372	Olfr296-ps1	olfactory receptor 296, pseudogene 1 [Source:MGI Symbol;Acc:MGI:3030130]	1102	NA	NA	NA	NA	NA	0	0	0	0	0
ENSMUST00000217438.1	ENSMUSG00000111073	Olfr977-ps1	olfactory receptor 977, pseudogene 1 [Source:MGI Symbol;Acc:MGI:3030811]	943	NA	NA	NA	NA	NA	0	0	0	0	0
ENSMUST00000118957.1	ENSMUSG00000075067	Olfr1267-ps1	olfactory receptor 1267, pseudogene 1 [Source:MGI Symbol;Acc:MGI:3031101]	930	NA	NA	NA	NA	NA	0	0	0	0	0
ENSMUST00000211893.1	ENSMUSG00000110526	Olfr151	olfactory receptor 151 [Source:MGI Symbol;Acc:MGI:2661338]	1128	NA	NA	NA	NA	NA	0	0	0	0	0
ENSMUST00000221099.1	ENSMUSG00000110526	Olfr151	olfactory receptor 151 [Source:MGI Symbol;Acc:MGI:2661338]	929	NA	NA	NA	NA	NA	0	0	0	0	0
ENSMUST00000216665.2	ENSMUSG00000050577	Olfr1038-ps	olfactory receptor 1038, pseudogene [Source:MGI Symbol;Acc:MGI:3030872]	4530	NA	NA	NA	NA	NA	0	0	0	0	0
ENSMUST00000149775.2	ENSMUSG00000050577	Olfr1038-ps	olfactory receptor 1038, pseudogene [Source:MGI Symbol;Acc:MGI:3030872]	1209	NA	NA	NA	NA	NA	0	0	0	0	0
ENSMUST00000117787.3	ENSMUSG00000082574	Olfr1268-ps1	olfactory receptor 1268, pseudogene 1 [Source:MGI Symbol;Acc:MGI:3031102]	2501	NA	NA	NA	NA	NA	0	0	0	0	0
ENSMUST00000117959.2	ENSMUSG00000111338	Olfr29-ps1	olfactory receptor 29, pseudogene 1 [Source:MGI Symbol;Acc:MGI:1352685]	963	NA	NA	NA	NA	NA	0	0	0	0	0
ENSMUST00000194208.5	ENSMUSG00000041750	Cd1d2	CD1d2 antigen [Source:MGI Symbol;Acc:MGI:107675]	1527	NA	NA	NA	NA	NA	0	0	0	0	0
ENSMUST00000192481.1	ENSMUSG00000041750	Cd1d2	CD1d2 antigen [Source:MGI Symbol;Acc:MGI:107675]	1131	NA	NA	NA	NA	NA	0	0	0	0	0
ENSMUST00000041920.4	ENSMUSG00000041750	Cd1d2	CD1d2 antigen [Source:MGI Symbol;Acc:MGI:107675]	1243	NA	NA	NA	NA	NA	0	0	0	0	0
ENSMUST00000121432.3	ENSMUSG00000081859	Olfr650-ps1	olfactory receptor 650, pseudogene 1 [Source:MGI Symbol;Acc:MGI:3030484]	2321	NA	NA	NA	NA	NA	0	0	0	0	0
ENSMUST00000223545.1	ENSMUSG00000113163	Olfr335-ps	olfactory receptor 335, pseudogene [Source:MGI Symbol;Acc:MGI:3030169]	939	NA	NA	NA	NA	NA	0	0	0	0	0
ENSMUST00000174177.1	ENSMUSG00000092300	Cdk3	cyclin-dependent kinase 3 [Source:MGI Symbol;Acc:MGI:1916931]	915	NA	NA	NA	NA	NA	0	0	0	0	0
ENSMUST00000174248.7	ENSMUSG00000092300	Cdk3	cyclin-dependent kinase 3 [Source:MGI Symbol;Acc:MGI:1916931]	519	NA	NA	NA	NA	NA	0	0	0	0	0
ENSMUST00000173567.1	ENSMUSG00000092300	Cdk3	cyclin-dependent kinase 3 [Source:MGI Symbol;Acc:MGI:1916931]	1252	330.5	301	223	330	222	2	4	1	2	4
ENSMUST00000182769.9	ENSMUSG00000067882	Casp16	caspase 16, apoptosis-related cysteine peptidase [Source:MGI Symbol;Acc:MGI:3646305]	1477	NA	NA	NA	NA	NA	0	0	0	0	0
ENSMUST00000088673.4	ENSMUSG00000067882	Casp16	caspase 16, apoptosis-related cysteine peptidase [Source:MGI Symbol;Acc:MGI:3646305]	531	NA	NA	NA	NA	NA	0	0	0	0	0
ENSMUST00000175971.2	ENSMUSG00000091967	Vmn2r-ps5	vomeronasal 2, receptor, pseudogene 5 [Source:MGI Symbol;Acc:MGI:3645404]	2721	NA	NA	NA	NA	NA	0	0	0	0	0
ENSMUST00000234658.1	ENSMUSG00000091967	Vmn2r-ps5	vomeronasal 2, receptor, pseudogene 5 [Source:MGI Symbol;Acc:MGI:3645404]	1287	NA	NA	NA	NA	NA	0	0	0	0	0
ENSMUST00000214356.2	ENSMUSG00000080809	Olfr1273-ps	olfactory receptor 1273, pseudogene [Source:MGI Symbol;Acc:MGI:3031107]	4698	NA	NA	NA	NA	NA	0	0	0	0	0
ENSMUST00000195589.5	ENSMUSG00000079293	Clec7a	C-type lectin domain family 7, member a [Source:MGI Symbol;Acc:MGI:1861431]	2272	NA	NA	NA	66	NA	0	0	0	1	0
ENSMUST00000184581.2	ENSMUSG00000079293	Clec7a	C-type lectin domain family 7, member a [Source:MGI Symbol;Acc:MGI:1861431]	707	NA	NA	NA	NA	NA	0	0	0	0	0
ENSMUST00000184861.3	ENSMUSG00000079293	Clec7a	C-type lectin domain family 7, member a [Source:MGI Symbol;Acc:MGI:1861431]	655	NA	NA	NA	NA	NA	0	0	0	0	0
ENSMUST00000112076.8	ENSMUSG00000079293	Clec7a	C-type lectin domain family 7, member a [Source:MGI Symbol;Acc:MGI:1861431]	2277	NA	107	NA	100	NA	0	1	0	1	0
ENSMUST00000173420.1	ENSMUSG00000092517	Art2a	ADP-ribosyltransferase 2a [Source:MGI Symbol;Acc:MGI:107546]	1257	NA	NA	NA	NA	NA	0	0	0	0	0
ENSMUST00000211998.1	ENSMUSG00000110431	Olfr892-ps1	olfactory receptor 892, pseudogene 1 [Source:MGI Symbol;Acc:MGI:3030726]	932	NA	NA	NA	NA	NA	0	0	0	0	0
ENSMUST00000213589.1	ENSMUSG00000110881	Olfr897-ps1	olfactory receptor 897, pseudogene 1 [Source:MGI Symbol;Acc:MGI:3030731]	935	NA	NA	NA	NA	NA	0	0	0	0	0
ENSMUST00000135184.7	ENSMUSG00000000386	Mx1	MX dynamin-like GTPase 1 [Source:MGI Symbol;Acc:MGI:97243]	2967	NA	NA	NA	NA	NA	0	0	0	0	0
ENSMUST00000155233.7	ENSMUSG00000000386	Mx1	MX dynamin-like GTPase 1 [Source:MGI Symbol;Acc:MGI:97243]	2790	NA	NA	93	NA	NA	0	0	1	0	0
ENSMUST00000113768.7	ENSMUSG00000000386	Mx1	MX dynamin-like GTPase 1 [Source:MGI Symbol;Acc:MGI:97243]	2695	NA	NA	NA	NA	NA	0	0	0	0	0
ENSMUST00000238205.1	ENSMUSG00000000386	Mx1	MX dynamin-like GTPase 1 [Source:MGI Symbol;Acc:MGI:97243]	1418	NA	NA	NA	NA	NA	0	0	0	0	0
ENSMUST00000238262.1	ENSMUSG00000000386	Mx1	MX dynamin-like GTPase 1 [Source:MGI Symbol;Acc:MGI:97243]	925	NA	NA	NA	NA	NA	0	0	0	0	0
ENSMUST00000231995.1	ENSMUSG00000000386	Mx1	MX dynamin-like GTPase 1 [Source:MGI Symbol;Acc:MGI:97243]	352	NA	NA	NA	NA	NA	0	0	0	0	0
ENSMUST00000231461.1	ENSMUSG00000000386	Mx1	MX dynamin-like GTPase 1 [Source:MGI Symbol;Acc:MGI:97243]	755	NA	NA	NA	NA	NA	0	0	0	0	0
ENSMUST00000231455.1	ENSMUSG00000000386	Mx1	MX dynamin-like GTPase 1 [Source:MGI Symbol;Acc:MGI:97243]	409	NA	NA	NA	NA	NA	0	0	0	0	0
ENSMUST00000142883.2	ENSMUSG00000000386	Mx1	MX dynamin-like GTPase 1 [Source:MGI Symbol;Acc:MGI:97243]	481	NA	NA	NA	NA	NA	0	0	0	0	0
ENSMUST00000232193.2	ENSMUSG00000000386	Mx1	MX dynamin-like GTPase 1 [Source:MGI Symbol;Acc:MGI:97243]	908	NA	NA	NA	NA	NA	0	0	0	0	0
ENSMUST00000023655.12	ENSMUSG00000000386	Mx1	MX dynamin-like GTPase 1 [Source:MGI Symbol;Acc:MGI:97243]	3385	NA	NA	NA	NA	NA	0	0	0	0	0
ENSMUST00000232282.2	ENSMUSG00000000386	Mx1	MX dynamin-like GTPase 1 [Source:MGI Symbol;Acc:MGI:97243]	1401	NA	NA	NA	NA	NA	0	0	0	0	0
ENSMUST00000209914.1	ENSMUSG00000109806	Olfr663	olfactory receptor 663 [Source:MGI Symbol;Acc:MGI:3030497]	959	NA	NA	NA	NA	NA	0	0	0	0	0
ENSMUST00000072887.4	ENSMUSG00000051885	Olfr664	olfactory receptor 664 [Source:MGI Symbol;Acc:MGI:3030498]	966	NA	NA	NA	NA	NA	0	0	0	0	0
ENSMUST00000211596.1	ENSMUSG00000051885	Olfr664	olfactory receptor 664 [Source:MGI Symbol;Acc:MGI:3030498]	921	NA	NA	NA	NA	NA	0	0	0	0	0
ENSMUST00000190447.7	ENSMUSG00000023341	Mx2	MX dynamin-like GTPase 2 [Source:MGI Symbol;Acc:MGI:97244]	2476	NA	NA	NA	NA	NA	0	0	0	0	0
ENSMUST00000188251.6	ENSMUSG00000023341	Mx2	MX dynamin-like GTPase 2 [Source:MGI Symbol;Acc:MGI:97244]	2421	241	252	267	NA	120	1	3	2	0	1
ENSMUST00000190097.1	ENSMUSG00000023341	Mx2	MX dynamin-like GTPase 2 [Source:MGI Symbol;Acc:MGI:97244]	649	NA	NA	NA	NA	NA	0	0	0	0	0
ENSMUST00000191103.1	ENSMUSG00000023341	Mx2	MX dynamin-like GTPase 2 [Source:MGI Symbol;Acc:MGI:97244]	537	NA	NA	NA	NA	NA	0	0	0	0	0
ENSMUST00000024112.7	ENSMUSG00000023341	Mx2	MX dynamin-like GTPase 2 [Source:MGI Symbol;Acc:MGI:97244]	2417	NA	191	NA	NA	NA	0	1	0	0	0
ENSMUST00000215139.1	ENSMUSG00000110991	Olfr908	olfactory receptor 908 [Source:MGI Symbol;Acc:MGI:3030742]	932	NA	NA	NA	NA	NA	0	0	0	0	0
ENSMUST00000215191.1	ENSMUSG00000057444	Olfr915	olfactory receptor 915 [Source:MGI Symbol;Acc:MGI:3030749]	933	NA	NA	NA	NA	NA	0	0	0	0	0
ENSMUST00000215291.1	ENSMUSG00000111700	Gm49385	predicted gene, 49385 [Source:MGI Symbol;Acc:MGI:6121609]	572	NA	NA	NA	NA	NA	0	0	0	0	0
ENSMUST00000182725.1	ENSMUSG00000029605	Oas1b	2'-5' oligoadenylate synthetase 1B [Source:MGI Symbol;Acc:MGI:97430]	558	NA	NA	NA	NA	NA	0	0	0	0	0
ENSMUST00000183291.1	ENSMUSG00000029605	Oas1b	2'-5' oligoadenylate synthetase 1B [Source:MGI Symbol;Acc:MGI:97430]	1837	187	125	233	225	NA	1	1	1	1	0
ENSMUST00000086377.8	ENSMUSG00000029605	Oas1b	2'-5' oligoadenylate synthetase 1B [Source:MGI Symbol;Acc:MGI:97430]	1832	NA	NA	NA	59	NA	0	0	0	1	0
ENSMUST00000071242.4	ENSMUSG00000059768	Olfr682-ps1	olfactory receptor 682, pseudogene 1 [Source:MGI Symbol;Acc:MGI:3030516]	934	NA	NA	NA	NA	NA	0	0	0	0	0
ENSMUST00000214399.3	ENSMUSG00000059768	Olfr682-ps1	olfactory receptor 682, pseudogene 1 [Source:MGI Symbol;Acc:MGI:3030516]	897	NA	NA	NA	NA	NA	0	0	0	0	0
ENSMUST00000174854.2	ENSMUSG00000055413	H2-Q5	histocompatibility 2, Q region locus 5 [Source:MGI Symbol;Acc:MGI:95934]	1156	NA	44	55	94	141	0	1	1	2	1
ENSMUST00000172979.3	ENSMUSG00000055413	H2-Q5	histocompatibility 2, Q region locus 5 [Source:MGI Symbol;Acc:MGI:95934]	998	NA	NA	NA	NA	NA	0	0	0	0	0
ENSMUST00000116010.2	ENSMUSG00000055413	H2-Q5	histocompatibility 2, Q region locus 5 [Source:MGI Symbol;Acc:MGI:95934]	172	NA	NA	NA	NA	NA	0	0	0	0	0
ENSMUST00000206214.2	ENSMUSG00000108464	Olfr192	olfactory receptor 192 [Source:MGI Symbol;Acc:MGI:3030026]	1054	NA	NA	NA	NA	NA	0	0	0	0	0
ENSMUST00000205727.2	ENSMUSG00000108464	Olfr192	olfactory receptor 192 [Source:MGI Symbol;Acc:MGI:3030026]	1141	NA	NA	NA	NA	NA	0	0	0	0	0
ENSMUST00000207772.2	ENSMUSG00000109020	Olfr197	olfactory receptor 197 [Source:MGI Symbol;Acc:MGI:3030031]	1320	NA	NA	NA	NA	NA	0	0	0	0	0
ENSMUST00000080031.2	ENSMUSG00000109020	Olfr197	olfactory receptor 197 [Source:MGI Symbol;Acc:MGI:3030031]	926	NA	NA	NA	NA	NA	0	0	0	0	0
ENSMUST00000134042.2	ENSMUSG00000036322	H2-Ea-ps	histocompatibility 2, class II antigen E alpha, pseudogene [Source:MGI Symbol;Acc:MGI:95900]	687	NA	NA	NA	NA	NA	0	0	0	0	0
ENSMUST00000235482.1	ENSMUSG00000036322	H2-Ea-ps	histocompatibility 2, class II antigen E alpha, pseudogene [Source:MGI Symbol;Acc:MGI:95900]	1036	NA	NA	NA	NA	NA	0	0	0	0	0
ENSMUST00000184850.7	ENSMUSG00000073406	H2-Bl	histocompatibility 2, blastocyst [Source:MGI Symbol;Acc:MGI:892004]	1072	248	128.5	81	238	NA	1	2	1	1	0
ENSMUST00000173080.9	ENSMUSG00000073406	H2-Bl	histocompatibility 2, blastocyst [Source:MGI Symbol;Acc:MGI:892004]	1138	NA	NA	NA	NA	NA	0	0	0	0	0
ENSMUST00000185167.7	ENSMUSG00000073406	H2-Bl	histocompatibility 2, blastocyst [Source:MGI Symbol;Acc:MGI:892004]	836	NA	NA	NA	NA	NA	0	0	0	0	0
ENSMUST00000195838.5	ENSMUSG00000073406	H2-Bl	histocompatibility 2, blastocyst [Source:MGI Symbol;Acc:MGI:892004]	1105	NA	NA	NA	NA	NA	0	0	0	0	0
ENSMUST00000194244.5	ENSMUSG00000073406	H2-Bl	histocompatibility 2, blastocyst [Source:MGI Symbol;Acc:MGI:892004]	862	NA	NA	NA	NA	NA	0	0	0	0	0
ENSMUST00000185087.7	ENSMUSG00000073406	H2-Bl	histocompatibility 2, blastocyst [Source:MGI Symbol;Acc:MGI:892004]	1064	NA	NA	NA	NA	NA	0	0	0	0	0
ENSMUST00000195833.5	ENSMUSG00000073406	H2-Bl	histocompatibility 2, blastocyst [Source:MGI Symbol;Acc:MGI:892004]	829	NA	NA	NA	NA	NA	0	0	0	0	0
ENSMUST00000184502.7	ENSMUSG00000073406	H2-Bl	histocompatibility 2, blastocyst [Source:MGI Symbol;Acc:MGI:892004]	862	NA	NA	NA	NA	NA	0	0	0	0	0
ENSMUST00000183560.7	ENSMUSG00000073406	H2-Bl	histocompatibility 2, blastocyst [Source:MGI Symbol;Acc:MGI:892004]	316	NA	NA	NA	NA	NA	0	0	0	0	0
ENSMUST00000183999.7	ENSMUSG00000073406	H2-Bl	histocompatibility 2, blastocyst [Source:MGI Symbol;Acc:MGI:892004]	358	NA	NA	NA	NA	NA	0	0	0	0	0
ENSMUST00000192532.1	ENSMUSG00000073406	H2-Bl	histocompatibility 2, blastocyst [Source:MGI Symbol;Acc:MGI:892004]	995	174	NA	NA	NA	NA	1	0	0	0	0
ENSMUST00000173185.1	ENSMUSG00000092212	Slc22a13b	solute carrier family 22 (organic cation transporter), member 13b [Source:MGI Symbol;Acc:MGI:1924762]	1458	NA	291	NA	149	181.5	0	1	0	2	2
ENSMUST00000134011.3	ENSMUSG00000069824	Olfr377-ps1	olfactory receptor 377, pseudogene 1 [Source:MGI Symbol;Acc:MGI:3030211]	1136	NA	NA	NA	NA	NA	0	0	0	0	0
ENSMUST00000215546.1	ENSMUSG00000110780	Olfr949-ps1	olfactory receptor 949, pseudogene 1 [Source:MGI Symbol;Acc:MGI:3030783]	949	NA	NA	NA	NA	NA	0	0	0	0	0
ENSMUST00000189634.6	ENSMUSG00000046203	Sprr2g	small proline-rich protein 2G [Source:MGI Symbol;Acc:MGI:1330348]	651	NA	NA	NA	NA	NA	0	0	0	0	0
ENSMUST00000056590.5	ENSMUSG00000046203	Sprr2g	small proline-rich protein 2G [Source:MGI Symbol;Acc:MGI:1330348]	650	NA	NA	NA	NA	NA	0	0	0	0	0
ENSMUST00000117860.1	ENSMUSG00000046590	Olfr1165-ps	olfactory receptor 1165, pseudogene [Source:MGI Symbol;Acc:MGI:3030999]	950	NA	NA	NA	NA	NA	0	0	0	0	0
ENSMUST00000117349.7	ENSMUSG00000084387	Olfr379-ps1	olfactory receptor 379, pseudogene 1 [Source:MGI Symbol;Acc:MGI:3030213]	934	NA	NA	NA	NA	NA	0	0	0	0	0
ENSMUST00000118068.2	ENSMUSG00000081665	Gm15922	predicted gene 15922 [Source:MGI Symbol;Acc:MGI:3802148]	3462	217	NA	NA	NA	NA	1	0	0	0	0
ENSMUST00000118736.3	ENSMUSG00000089732	Olfr1117-ps1	olfactory receptor 1117, pseudogene 1 [Source:MGI Symbol;Acc:MGI:3030951]	984	NA	NA	NA	NA	NA	0	0	0	0	0
ENSMUST00000238885.1	ENSMUSG00000118516	AC118710.1	cytochrome P450, family 2, subfamily d, polypeptide 13, pseudogene	3078	NA	NA	NA	NA	NA	0	0	0	0	0
ENSMUST00000239057.1	ENSMUSG00000118516	AC118710.1	cytochrome P450, family 2, subfamily d, polypeptide 13, pseudogene	1626	NA	NA	NA	NA	NA	0	0	0	0	0
ENSMUST00000183378.2	ENSMUSG00000098947	V1rg10	vomeronasal 1 receptor, G10 [Source:MGI Symbol;Acc:MGI:2159654]	937	NA	NA	NA	NA	NA	0	0	0	0	0
ENSMUST00000210779.1	ENSMUSG00000110122	Olfr562-ps1	olfactory receptor 562, pseudogene 1 [Source:MGI Symbol;Acc:MGI:3030396]	951	NA	NA	NA	NA	NA	0	0	0	0	0
ENSMUST00000213073.1	ENSMUSG00000110555	Olfr863-ps1	olfactory receptor 863, pseudogene 1 [Source:MGI Symbol;Acc:MGI:3030697]	929	NA	NA	NA	NA	NA	0	0	0	0	0
ENSMUST00000194248.1	ENSMUSG00000006395	Hyi	hydroxypyruvate isomerase (putative) [Source:MGI Symbol;Acc:MGI:1915430]	936	263	276.333333333333	164	57	140.5	1	3	4	1	2
ENSMUST00000179719.1	ENSMUSG00000006395	Hyi	hydroxypyruvate isomerase (putative) [Source:MGI Symbol;Acc:MGI:1915430]	1296	NA	102	NA	NA	266.666666666666	0	1	0	0	3
ENSMUST00000106393.7	ENSMUSG00000006395	Hyi	hydroxypyruvate isomerase (putative) [Source:MGI Symbol;Acc:MGI:1915430]	843	108.2	128.076923076923	114	133.857142857142	144.939393939393	25	26	15	7	33
ENSMUST00000132882.1	ENSMUSG00000006395	Hyi	hydroxypyruvate isomerase (putative) [Source:MGI Symbol;Acc:MGI:1915430]	741	236	185	NA	NA	NA	1	1	0	0	0
ENSMUST00000006562.5	ENSMUSG00000006395	Hyi	hydroxypyruvate isomerase (putative) [Source:MGI Symbol;Acc:MGI:1915430]	910	NA	58	NA	347	NA	0	1	0	1	0
ENSMUST00000213225.2	ENSMUSG00000111678	Olfr1077-ps1	olfactory receptor 1077, pseudogene 1 [Source:MGI Symbol;Acc:MGI:3030911]	1212	NA	NA	NA	NA	NA	0	0	0	0	0
ENSMUST00000122808.1	ENSMUSG00000060183	Cxcl11	chemokine (C-X-C motif) ligand 11 [Source:MGI Symbol;Acc:MGI:1860203]	3794	NA	NA	NA	NA	NA	0	0	0	0	0
ENSMUST00000077820.5	ENSMUSG00000060183	Cxcl11	chemokine (C-X-C motif) ligand 11 [Source:MGI Symbol;Acc:MGI:1860203]	1581	NA	NA	NA	NA	NA	0	0	0	0	0
ENSMUST00000117704.1	ENSMUSG00000068824	Olfr1083-ps	olfactory receptor 1083, pseudogene [Source:MGI Symbol;Acc:MGI:3030917]	943	NA	NA	NA	NA	NA	0	0	0	0	0
ENSMUST00000216912.1	ENSMUSG00000095194	Olfr936	olfactory receptor 936 [Source:MGI Symbol;Acc:MGI:3030770]	937	NA	NA	NA	NA	NA	0	0	0	0	0
ENSMUST00000178303.1	ENSMUSG00000095194	Olfr936	olfactory receptor 936 [Source:MGI Symbol;Acc:MGI:3030770]	936	NA	NA	NA	NA	NA	0	0	0	0	0
ENSMUST00000201125.3	ENSMUSG00000006638	Abhd1	abhydrolase domain containing 1 [Source:MGI Symbol;Acc:MGI:1931013]	1352	165.5625	213.5	179	123.285714285714	148.727272727272	16	10	2	7	11
ENSMUST00000006814.8	ENSMUSG00000006638	Abhd1	abhydrolase domain containing 1 [Source:MGI Symbol;Acc:MGI:1931013]	1309	NA	201.666666666666	NA	NA	NA	0	3	0	0	0
ENSMUST00000209871.2	ENSMUSG00000110092	Olfr537-ps1	olfactory receptor 537, pseudogene 1 [Source:MGI Symbol;Acc:MGI:3030371]	2792	NA	NA	NA	NA	NA	0	0	0	0	0
ENSMUST00000210949.2	ENSMUSG00000110092	Olfr537-ps1	olfactory receptor 537, pseudogene 1 [Source:MGI Symbol;Acc:MGI:3030371]	2821	NA	NA	NA	NA	NA	0	0	0	0	0
ENSMUST00000094105.4	ENSMUSG00000110204	Olfr501-ps1	olfactory receptor 501, pseudogene 1 [Source:MGI Symbol;Acc:MGI:3030335]	946	NA	NA	NA	NA	NA	0	0	0	0	0
ENSMUST00000118378.1	ENSMUSG00000080891	Olfr587-ps1	olfactory receptor 587, pseudogene 1 [Source:MGI Symbol;Acc:MGI:3030421]	948	NA	NA	NA	NA	NA	0	0	0	0	0
ENSMUST00000209201.1	ENSMUSG00000080891	Olfr587-ps1	olfactory receptor 587, pseudogene 1 [Source:MGI Symbol;Acc:MGI:3030421]	477	NA	NA	NA	NA	NA	0	0	0	0	0
ENSMUST00000208396.1	ENSMUSG00000109148	Olfr1452-ps1	olfactory receptor 1452, pseudogene 1 [Source:MGI Symbol;Acc:MGI:3031286]	925	NA	NA	NA	NA	NA	0	0	0	0	0
ENSMUST00000121614.1	ENSMUSG00000082216	Olfr271-ps1	olfactory receptor 271, pseudogene 1 [Source:MGI Symbol;Acc:MGI:3030105]	952	NA	NA	NA	NA	NA	0	0	0	0	0
ENSMUST00000217546.1	ENSMUSG00000082216	Olfr271-ps1	olfactory receptor 271, pseudogene 1 [Source:MGI Symbol;Acc:MGI:3030105]	852	NA	NA	NA	NA	NA	0	0	0	0	0
ENSMUST00000217651.1	ENSMUSG00000043089	Mmp1a	matrix metallopeptidase 1a (interstitial collagenase) [Source:MGI Symbol;Acc:MGI:1933846]	2011	NA	NA	NA	NA	NA	0	0	0	0	0
ENSMUST00000034492.5	ENSMUSG00000043089	Mmp1a	matrix metallopeptidase 1a (interstitial collagenase) [Source:MGI Symbol;Acc:MGI:1933846]	2022	NA	NA	NA	NA	NA	0	0	0	0	0
ENSMUST00000135748.1	ENSMUSG00000058908	Pla2g2a	phospholipase A2, group IIA (platelets, synovial fluid) [Source:MGI Symbol;Acc:MGI:104642]	788	NA	NA	NA	NA	NA	0	0	0	0	0
ENSMUST00000134898.1	ENSMUSG00000058908	Pla2g2a	phospholipase A2, group IIA (platelets, synovial fluid) [Source:MGI Symbol;Acc:MGI:104642]	462	NA	NA	NA	NA	NA	0	0	0	0	0
ENSMUST00000147728.1	ENSMUSG00000058908	Pla2g2a	phospholipase A2, group IIA (platelets, synovial fluid) [Source:MGI Symbol;Acc:MGI:104642]	557	NA	NA	NA	NA	NA	0	0	0	0	0
ENSMUST00000077582.13	ENSMUSG00000058908	Pla2g2a	phospholipase A2, group IIA (platelets, synovial fluid) [Source:MGI Symbol;Acc:MGI:104642]	784	NA	NA	NA	NA	NA	0	0	0	0	0
ENSMUST00000208760.1	ENSMUSG00000109100	Olfr1464-ps1	olfactory receptor 1464, pseudogene 1 [Source:MGI Symbol;Acc:MGI:3031298]	923	NA	NA	NA	NA	NA	0	0	0	0	0
ENSMUST00000214075.2	ENSMUSG00000111190	Olfr947-ps1	olfactory receptor 947, pseudogene 1 [Source:MGI Symbol;Acc:MGI:3030781]	2165	NA	NA	NA	NA	NA	0	0	0	0	0
ENSMUST00000214936.1	ENSMUSG00000111190	Olfr947-ps1	olfactory receptor 947, pseudogene 1 [Source:MGI Symbol;Acc:MGI:3030781]	2168	NA	NA	NA	NA	NA	0	0	0	0	0
ENSMUST00000215471.1	ENSMUSG00000111190	Olfr947-ps1	olfactory receptor 947, pseudogene 1 [Source:MGI Symbol;Acc:MGI:3030781]	2177	NA	NA	NA	NA	NA	0	0	0	0	0
ENSMUST00000205127.1	ENSMUSG00000108058	Olfr451-ps1	olfactory receptor 451, pseudogene 1 [Source:MGI Symbol;Acc:MGI:3030285]	936	NA	NA	NA	NA	NA	0	0	0	0	0
ENSMUST00000207287.2	ENSMUSG00000109544	Olfr1468-ps1	olfactory receptor 1468, pseudogene 1 [Source:MGI Symbol;Acc:MGI:3031302]	1208	NA	NA	NA	NA	NA	0	0	0	0	0
ENSMUST00000179386.1	ENSMUSG00000091950	Olfr421-ps1	olfactory receptor 421, pseudogene 1 [Source:MGI Symbol;Acc:MGI:3030255]	1050	NA	NA	NA	NA	NA	0	0	0	0	0
ENSMUST00000222301.1	ENSMUSG00000044537	Olfr779	olfactory receptor 779 [Source:MGI Symbol;Acc:MGI:3030613]	929	NA	NA	NA	NA	NA	0	0	0	0	0
ENSMUST00000069063.4	ENSMUSG00000044537	Olfr779	olfactory receptor 779 [Source:MGI Symbol;Acc:MGI:3030613]	390	NA	NA	NA	NA	NA	0	0	0	0	0
ENSMUST00000202355.1	ENSMUSG00000106893	Vmn1r-ps7	vomeronasal 1 receptor, pseudogene 7 [Source:MGI Symbol;Acc:MGI:3852361]	928	NA	NA	NA	NA	NA	0	0	0	0	0
ENSMUST00000213169.1	ENSMUSG00000044061	Olfr225	olfactory receptor 225 [Source:MGI Symbol;Acc:MGI:3030059]	2658	NA	NA	NA	NA	NA	0	0	0	0	0
ENSMUST00000055276.5	ENSMUSG00000044061	Olfr225	olfactory receptor 225 [Source:MGI Symbol;Acc:MGI:3030059]	1260	NA	NA	NA	NA	NA	0	0	0	0	0
ENSMUST00000196323.1	ENSMUSG00000104876	Trdc	T cell receptor delta, constant region [Source:MGI Symbol;Acc:MGI:98612]	3865	NA	169	NA	NA	NA	0	2	0	0	0
ENSMUST00000198398.4	ENSMUSG00000076928	Trac	T cell receptor alpha constant [Source:MGI Symbol;Acc:MGI:4439838]	935	159.75	155.8	134	NA	80	4	5	2	0	2
ENSMUST00000103740.1	ENSMUSG00000076928	Trac	T cell receptor alpha constant [Source:MGI Symbol;Acc:MGI:4439838]	413	NA	NA	NA	NA	NA	0	0	0	0	0
ENSMUST00000103558.2	ENSMUSG00000076749	Tcrg-C1	T cell receptor gamma, constant 1 [Source:MGI Symbol;Acc:MGI:98625]	924	NA	NA	NA	NA	NA	0	0	0	0	0
ENSMUST00000198163.1	ENSMUSG00000091682	Tcrg-C3	T cell receptor gamma, constant 3 [Source:MGI Symbol;Acc:MGI:98627]	648	NA	NA	NA	NA	NA	0	0	0	0	0
ENSMUST00000164407.1	ENSMUSG00000091682	Tcrg-C3	T cell receptor gamma, constant 3 [Source:MGI Symbol;Acc:MGI:98627]	519	NA	NA	NA	NA	NA	0	0	0	0	0
ENSMUST00000103561.2	ENSMUSG00000076752	Tcrg-C2	T-cell receptor gamma, constant 2 [Source:MGI Symbol;Acc:MGI:98626]	914	NA	NA	NA	NA	NA	0	0	0	0	0
ENSMUST00000179181.2	ENSMUSG00000076757	Tcrg-C4	T cell receptor gamma, constant 4 [Source:MGI Symbol;Acc:MGI:98628]	985	NA	NA	NA	NA	NA	0	0	0	0	0
ENSMUST00000192856.5	ENSMUSG00000076490	Trbc1	T cell receptor beta, constant region 1 [Source:MGI Symbol;Acc:MGI:4439726]	737	109	NA	NA	NA	NA	1	0	0	0	0
ENSMUST00000103291.1	ENSMUSG00000076490	Trbc1	T cell receptor beta, constant region 1 [Source:MGI Symbol;Acc:MGI:4439726]	512	NA	NA	NA	NA	NA	0	0	0	0	0
ENSMUST00000103299.2	ENSMUSG00000076498	Trbc2	T cell receptor beta, constant 2 [Source:MGI Symbol;Acc:MGI:4835227]	692	143.156462585034	137.524691358024	145.036231884057	150	145.858208955223	147	162	138	80	134
ENSMUST00000103427.1	ENSMUSG00000076618	Ighj4	immunoglobulin heavy joining 4 [Source:MGI Symbol;Acc:MGI:4439658]	54	NA	NA	NA	NA	NA	0	0	0	0	0
ENSMUST00000103428.1	ENSMUSG00000076619	Ighj3	immunoglobulin heavy joining 3 [Source:MGI Symbol;Acc:MGI:4439767]	48	NA	NA	NA	NA	NA	0	0	0	0	0
ENSMUST00000192746.1	ENSMUSG00000076620	Ighj2	immunoglobulin heavy joining 2 [Source:MGI Symbol;Acc:MGI:4439803]	48	NA	NA	NA	NA	NA	0	0	0	0	0
ENSMUST00000103429.1	ENSMUSG00000076620	Ighj2	immunoglobulin heavy joining 2 [Source:MGI Symbol;Acc:MGI:4439803]	54	NA	NA	NA	NA	NA	0	0	0	0	0
ENSMUST00000103430.1	ENSMUSG00000076621	Ighj1	immunoglobulin heavy joining 1 [Source:MGI Symbol;Acc:MGI:4439802]	53	NA	NA	NA	NA	NA	0	0	0	0	0
ENSMUST00000103408.1	ENSMUSG00000076607	Igkj4	immunoglobulin kappa joining 4 [Source:MGI Symbol;Acc:MGI:1316692]	38	NA	NA	NA	NA	NA	0	0	0	0	0
ENSMUST00000199459.1	ENSMUSG00000076608	Igkj5	immunoglobulin kappa joining 5 [Source:MGI Symbol;Acc:MGI:1316738]	38	NA	NA	NA	NA	NA	0	0	0	0	0
ENSMUST00000103409.1	ENSMUSG00000076608	Igkj5	immunoglobulin kappa joining 5 [Source:MGI Symbol;Acc:MGI:1316738]	42	NA	NA	NA	NA	NA	0	0	0	0	0
ENSMUST00000198234.1	ENSMUSG00000076605	Igkj2	immunoglobulin kappa joining 2 [Source:MGI Symbol;Acc:MGI:1316690]	39	NA	NA	NA	NA	NA	0	0	0	0	0
ENSMUST00000103406.1	ENSMUSG00000076605	Igkj2	immunoglobulin kappa joining 2 [Source:MGI Symbol;Acc:MGI:1316690]	43	NA	NA	NA	NA	NA	0	0	0	0	0
ENSMUST00000199487.1	ENSMUSG00000076606	Igkj3	immunoglobulin kappa joining 3 [Source:MGI Symbol;Acc:MGI:1316691]	38	NA	NA	NA	NA	NA	0	0	0	0	0
ENSMUST00000103407.2	ENSMUSG00000076606	Igkj3	immunoglobulin kappa joining 3 [Source:MGI Symbol;Acc:MGI:1316691]	36	NA	NA	NA	NA	NA	0	0	0	0	0
ENSMUST00000103405.1	ENSMUSG00000076604	Igkj1	immunoglobulin kappa joining 1 [Source:MGI Symbol;Acc:MGI:1316689]	38	NA	NA	NA	NA	NA	0	0	0	0	0
ENSMUST00000198313.1	ENSMUSG00000105066	Iglj4	immunoglobulin lambda joining 4 [Source:MGI Symbol;Acc:MGI:3645510]	42	NA	NA	NA	NA	NA	0	0	0	0	0
ENSMUST00000197969.1	ENSMUSG00000104975	Iglj2	immunoglobulin lambda joining 2 [Source:MGI Symbol;Acc:MGI:5293409]	38	NA	NA	NA	NA	NA	0	0	0	0	0
ENSMUST00000200074.1	ENSMUSG00000106405	Iglj3p	immunoglobulin lambda joining 3 pseudogene [Source:MGI Symbol;Acc:MGI:3645901]	38	NA	NA	NA	NA	NA	0	0	0	0	0
ENSMUST00000200211.1	ENSMUSG00000105231	Iglj3	immunoglobulin lambda joining 3 [Source:MGI Symbol;Acc:MGI:5293407]	38	NA	NA	NA	NA	NA	0	0	0	0	0
ENSMUST00000199490.1	ENSMUSG00000106668	Iglj1	immunoglobulin lambda joining 1 [Source:MGI Symbol;Acc:MGI:5009822]	38	NA	NA	NA	NA	NA	0	0	0	0	0
ENSMUST00000194738.5	ENSMUSG00000095079	Igha	immunoglobulin heavy constant alpha [Source:MGI Symbol;Acc:MGI:96444]	2540	179	NA	NA	NA	NA	1	0	0	0	0
ENSMUST00000178282.2	ENSMUSG00000095079	Igha	immunoglobulin heavy constant alpha [Source:MGI Symbol;Acc:MGI:96444]	1100	NA	NA	139	NA	NA	0	0	1	0	0
ENSMUST00000223335.1	ENSMUSG00000087642	Ighe	Immunoglobulin heavy constant epsilon [Source:MGI Symbol;Acc:MGI:2685746]	1460	NA	NA	NA	NA	NA	0	0	0	0	0
ENSMUST00000137336.2	ENSMUSG00000087642	Ighe	Immunoglobulin heavy constant epsilon [Source:MGI Symbol;Acc:MGI:2685746]	1367	NA	NA	NA	NA	NA	0	0	0	0	0
ENSMUST00000103416.8	ENSMUSG00000076612	Ighg2c	immunoglobulin heavy constant gamma 2C [Source:MGI Symbol;Acc:MGI:2686979]	1214	NA	NA	NA	NA	124	0	0	0	0	1
ENSMUST00000195192.1	ENSMUSG00000076612	Ighg2c	immunoglobulin heavy constant gamma 2C [Source:MGI Symbol;Acc:MGI:2686979]	1111	142.692307692307	155.714285714285	140.153846153846	135.416666666666	130.333333333333	13	14	13	12	9
ENSMUST00000192188.2	ENSMUSG00000076613	Ighg2b	immunoglobulin heavy constant gamma 2B [Source:MGI Symbol;Acc:MGI:96445]	2566	NA	NA	NA	NA	110	0	0	0	0	1
ENSMUST00000103418.2	ENSMUSG00000076613	Ighg2b	immunoglobulin heavy constant gamma 2B [Source:MGI Symbol;Acc:MGI:96445]	1114	NA	92	NA	NA	NA	0	1	0	0	0
ENSMUST00000194304.5	ENSMUSG00000076614	Ighg1	immunoglobulin heavy constant gamma 1 (G1m marker) [Source:MGI Symbol;Acc:MGI:96446]	2482	NA	NA	NA	NA	NA	0	0	0	0	0
ENSMUST00000103420.2	ENSMUSG00000076614	Ighg1	immunoglobulin heavy constant gamma 1 (G1m marker) [Source:MGI Symbol;Acc:MGI:96446]	1076	70	NA	NA	NA	NA	1	0	0	0	0
ENSMUST00000223179.1	ENSMUSG00000076615	Ighg3	Immunoglobulin heavy constant gamma 3 [Source:MGI Symbol;Acc:MGI:2144790]	2414	NA	59	NA	NA	NA	0	1	0	0	0
ENSMUST00000103423.2	ENSMUSG00000076615	Ighg3	Immunoglobulin heavy constant gamma 3 [Source:MGI Symbol;Acc:MGI:2144790]	1082	NA	59	NA	NA	NA	0	1	0	0	0
ENSMUST00000194162.5	ENSMUSG00000104213	Ighd	immunoglobulin heavy constant delta [Source:MGI Symbol;Acc:MGI:96447]	1806	91	180.5	142	318	80	1	2	1	1	1
ENSMUST00000192250.1	ENSMUSG00000104213	Ighd	immunoglobulin heavy constant delta [Source:MGI Symbol;Acc:MGI:96447]	802	NA	NA	NA	NA	NA	0	0	0	0	0
ENSMUST00000177715.7	ENSMUSG00000076617	Ighm	immunoglobulin heavy constant mu [Source:MGI Symbol;Acc:MGI:96448]	1698	136.677419354838	127.477272727272	113.40625	139.625	136	31	44	32	24	30
ENSMUST00000103426.2	ENSMUSG00000076617	Ighm	immunoglobulin heavy constant mu [Source:MGI Symbol;Acc:MGI:96448]	1493	123.257731958762	120.240384615384	125.864864864864	119.397435897435	124.3738317757	97	104	111	78	107
ENSMUST00000103410.2	ENSMUSG00000076609	Igkc	immunoglobulin kappa constant [Source:MGI Symbol;Acc:MGI:96495]	532	106.166666666666	109.5	153	97.3333333333333	91	6	6	1	3	1
ENSMUST00000197046.1	ENSMUSG00000106039	Iglc4	immunoglobulin lambda constant 4 [Source:MGI Symbol;Acc:MGI:3642936]	314	NA	133	NA	NA	NA	0	1	0	0	0
ENSMUST00000198182.1	ENSMUSG00000076937	Iglc2	immunoglobulin lambda constant 2 [Source:MGI Symbol;Acc:MGI:99547]	458	NA	NA	NA	NA	NA	0	0	0	0	0
ENSMUST00000103749.2	ENSMUSG00000076937	Iglc2	immunoglobulin lambda constant 2 [Source:MGI Symbol;Acc:MGI:99547]	606	NA	NA	NA	NA	NA	0	0	0	0	0
ENSMUST00000200235.1	ENSMUSG00000105547	Iglc3	immunoglobulin lambda constant 3 [Source:MGI Symbol;Acc:MGI:99886]	452	132	NA	NA	NA	NA	1	0	0	0	0
ENSMUST00000200568.1	ENSMUSG00000105906	Iglc1	immunoglobulin lambda constant 1 [Source:MGI Symbol;Acc:MGI:99546]	454	NA	105	NA	NA	NA	0	1	0	0	0
ENSMUST00000103304.2	ENSMUSG00000094491	Igkv1-133	immunoglobulin kappa variable 1-133 [Source:MGI Symbol;Acc:MGI:3648380]	374	NA	NA	NA	NA	NA	0	0	0	0	0
ENSMUST00000103305.1	ENSMUSG00000096580	Igkv1-132	immunoglobulin kappa variable 1-132 [Source:MGI Symbol;Acc:MGI:3648800]	362	NA	NA	NA	NA	NA	0	0	0	0	0
ENSMUST00000103306.1	ENSMUSG00000076505	Igkv1-131	immunoglobulin kappa variable 1-131 [Source:MGI Symbol;Acc:MGI:3645551]	362	NA	NA	NA	NA	NA	0	0	0	0	0
ENSMUST00000196006.4	ENSMUSG00000096461	Igkv14-130	immunoglobulin kappa variable 14-130 [Source:MGI Symbol;Acc:MGI:3645770]	353	NA	NA	NA	NA	NA	0	0	0	0	0
ENSMUST00000103307.2	ENSMUSG00000096461	Igkv14-130	immunoglobulin kappa variable 14-130 [Source:MGI Symbol;Acc:MGI:3645770]	350	NA	NA	NA	NA	NA	0	0	0	0	0
ENSMUST00000200578.4	ENSMUSG00000093906	Igkv9-129	immunoglobulin kappa variable 9-129 [Source:MGI Symbol;Acc:MGI:3525017]	353	NA	NA	NA	NA	NA	0	0	0	0	0
ENSMUST00000103308.2	ENSMUSG00000093906	Igkv9-129	immunoglobulin kappa variable 9-129 [Source:MGI Symbol;Acc:MGI:3525017]	350	NA	NA	NA	NA	NA	0	0	0	0	0
ENSMUST00000200586.1	ENSMUSG00000076508	Igkv17-127	immunoglobulin kappa variable 17-127 [Source:MGI Symbol;Acc:MGI:3646891]	359	NA	NA	NA	NA	NA	0	0	0	0	0
ENSMUST00000103309.2	ENSMUSG00000076508	Igkv17-127	immunoglobulin kappa variable 17-127 [Source:MGI Symbol;Acc:MGI:3646891]	341	NA	NA	NA	NA	NA	0	0	0	0	0
ENSMUST00000103310.2	ENSMUSG00000094345	Igkv14-126	immunoglobulin kappa variable 14-126 [Source:MGI Symbol;Acc:MGI:3643131]	358	NA	NA	NA	NA	NA	0	0	0	0	0
ENSMUST00000197406.4	ENSMUSG00000095737	Igkv11-125	immunoglobulin kappa variable 11-125 [Source:MGI Symbol;Acc:MGI:3642338]	353	NA	NA	NA	NA	NA	0	0	0	0	0
ENSMUST00000103311.2	ENSMUSG00000095737	Igkv11-125	immunoglobulin kappa variable 11-125 [Source:MGI Symbol;Acc:MGI:3642338]	350	NA	NA	NA	NA	NA	0	0	0	0	0
ENSMUST00000196768.1	ENSMUSG00000096632	Igkv9-124	immunoglobulin kappa chain variable 9-124 [Source:MGI Symbol;Acc:MGI:3646892]	353	NA	NA	NA	NA	NA	0	0	0	0	0
ENSMUST00000103312.2	ENSMUSG00000096632	Igkv9-124	immunoglobulin kappa chain variable 9-124 [Source:MGI Symbol;Acc:MGI:3646892]	287	NA	NA	NA	NA	NA	0	0	0	0	0
ENSMUST00000103313.2	ENSMUSG00000076512	Igkv9-123	immunoglobulin kappa variable 9-123 [Source:MGI Symbol;Acc:MGI:3643848]	377	NA	NA	NA	NA	NA	0	0	0	0	0
ENSMUST00000103314.2	ENSMUSG00000095497	Igkv1-122	immunoglobulin kappa chain variable 1-122 [Source:MGI Symbol;Acc:MGI:4439722]	383	NA	NA	NA	NA	NA	0	0	0	0	0
ENSMUST00000197515.1	ENSMUSG00000076514	Igkv17-121	immunoglobulin kappa variable 17-121 [Source:MGI Symbol;Acc:MGI:3647671]	359	NA	NA	NA	NA	NA	0	0	0	0	0
ENSMUST00000103315.2	ENSMUSG00000076514	Igkv17-121	immunoglobulin kappa variable 17-121 [Source:MGI Symbol;Acc:MGI:3647671]	350	NA	NA	NA	NA	NA	0	0	0	0	0
ENSMUST00000103316.1	ENSMUSG00000094872	Igkv9-120	immunoglobulin kappa chain variable 9-120 [Source:MGI Symbol;Acc:MGI:3647784]	353	NA	NA	NA	NA	NA	0	0	0	0	0
ENSMUST00000103317.2	ENSMUSG00000094335	Igkv1-117	immunoglobulin kappa variable 1-117 [Source:MGI Symbol;Acc:MGI:4439721]	404	NA	NA	NA	NA	NA	0	0	0	0	0
ENSMUST00000103318.5	ENSMUSG00000076518	Igkv2-112	immunoglobulin kappa variable 2-112 [Source:MGI Symbol;Acc:MGI:3644894]	361	NA	NA	NA	NA	NA	0	0	0	0	0
ENSMUST00000103319.2	ENSMUSG00000076518	Igkv2-112	immunoglobulin kappa variable 2-112 [Source:MGI Symbol;Acc:MGI:3644894]	358	NA	NA	NA	NA	NA	0	0	0	0	0
ENSMUST00000103320.2	ENSMUSG00000095771	Igkv14-111	immunoglobulin kappa variable 14-111 [Source:MGI Symbol;Acc:MGI:4439863]	368	NA	NA	NA	NA	NA	0	0	0	0	0
ENSMUST00000103321.2	ENSMUSG00000093861	Igkv1-110	immunoglobulin kappa variable 1-110 [Source:MGI Symbol;Acc:MGI:4439558]	401	NA	NA	NA	NA	NA	0	0	0	0	0
ENSMUST00000103322.2	ENSMUSG00000105606	Igkv2-109	immunoglobulin kappa variable 2-109 [Source:MGI Symbol;Acc:MGI:3642626]	374	NA	NA	NA	NA	NA	0	0	0	0	0
ENSMUST00000103323.2	ENSMUSG00000076522	Igkv16-104	immunoglobulin kappa variable 16-104 [Source:MGI Symbol;Acc:MGI:2685913]	378	NA	NA	NA	NA	NA	0	0	0	0	0
ENSMUST00000103324.2	ENSMUSG00000076523	Igkv15-103	immunoglobulin kappa chain variable 15-103 [Source:MGI Symbol;Acc:MGI:96513]	375	NA	NA	NA	NA	NA	0	0	0	0	0
ENSMUST00000200406.1	ENSMUSG00000106403	Igkv20-101-2	immunoglobulin kappa chain variable 20-101-2 [Source:MGI Symbol;Acc:MGI:5009884]	339	NA	NA	NA	NA	NA	0	0	0	0	0
ENSMUST00000199510.4	ENSMUSG00000096515	Igkv14-100	immunoglobulin kappa chain variable 14-100 [Source:MGI Symbol;Acc:MGI:4439559]	353	NA	NA	NA	NA	NA	0	0	0	0	0
ENSMUST00000103325.2	ENSMUSG00000096515	Igkv14-100	immunoglobulin kappa chain variable 14-100 [Source:MGI Symbol;Acc:MGI:4439559]	350	NA	NA	NA	NA	NA	0	0	0	0	0
ENSMUST00000168090.2	ENSMUSG00000076525	Igkv1-99	immunoglobulin kappa variable 1-99 [Source:MGI Symbol;Acc:MGI:4439724]	376	NA	NA	NA	NA	NA	0	0	0	0	0
ENSMUST00000103326.2	ENSMUSG00000076525	Igkv1-99	immunoglobulin kappa variable 1-99 [Source:MGI Symbol;Acc:MGI:4439724]	359	NA	NA	NA	NA	NA	0	0	0	0	0
ENSMUST00000196839.4	ENSMUSG00000076526	Igkv12-98	immunoglobulin kappa variable 12-98 [Source:MGI Symbol;Acc:MGI:4439560]	347	NA	NA	NA	NA	NA	0	0	0	0	0
ENSMUST00000103327.2	ENSMUSG00000076526	Igkv12-98	immunoglobulin kappa variable 12-98 [Source:MGI Symbol;Acc:MGI:4439560]	344	NA	NA	NA	NA	NA	0	0	0	0	0
ENSMUST00000103328.2	ENSMUSG00000094420	Igkv10-96	immunoglobulin kappa variable 10-96 [Source:MGI Symbol;Acc:MGI:4439561]	359	NA	NA	NA	NA	NA	0	0	0	0	0
ENSMUST00000198735.1	ENSMUSG00000094902	Igkv10-95	immunoglobulin kappa variable 10-95 [Source:MGI Symbol;Acc:MGI:3644598]	347	NA	NA	NA	NA	NA	0	0	0	0	0
ENSMUST00000103329.2	ENSMUSG00000094902	Igkv10-95	immunoglobulin kappa variable 10-95 [Source:MGI Symbol;Acc:MGI:3644598]	287	NA	NA	NA	NA	NA	0	0	0	0	0
ENSMUST00000103330.1	ENSMUSG00000096490	Igkv10-94	immunoglobulin kappa variable 10-94 [Source:MGI Symbol;Acc:MGI:3646140]	347	NA	NA	NA	NA	NA	0	0	0	0	0
ENSMUST00000196863.1	ENSMUSG00000098814	Igkv19-93	immunoglobulin kappa chain variable 19-93 [Source:MGI Symbol;Acc:MGI:107617]	363	NA	NA	NA	NA	NA	0	0	0	0	0
ENSMUST00000183936.1	ENSMUSG00000098814	Igkv19-93	immunoglobulin kappa chain variable 19-93 [Source:MGI Symbol;Acc:MGI:107617]	344	NA	NA	NA	NA	NA	0	0	0	0	0
ENSMUST00000103332.1	ENSMUSG00000076531	Igkv4-92	immunoglobulin kappa variable 4-92 [Source:MGI Symbol;Acc:MGI:2686254]	351	NA	NA	NA	NA	NA	0	0	0	0	0
ENSMUST00000103333.3	ENSMUSG00000076532	Igkv4-91	immunoglobulin kappa chain variable 4-91 [Source:MGI Symbol;Acc:MGI:3642277]	358	NA	NA	NA	NA	NA	0	0	0	0	0
ENSMUST00000103334.3	ENSMUSG00000076533	Igkv4-90	immunoglobulin kappa chain variable 4-90 [Source:MGI Symbol;Acc:MGI:4439830]	352	NA	NA	NA	NA	NA	0	0	0	0	0
ENSMUST00000199143.4	ENSMUSG00000076534	Igkv12-89	immunoglobulin kappa chain variable 12-89 [Source:MGI Symbol;Acc:MGI:4439829]	338	NA	NA	NA	NA	NA	0	0	0	0	0
ENSMUST00000103335.2	ENSMUSG00000076534	Igkv12-89	immunoglobulin kappa chain variable 12-89 [Source:MGI Symbol;Acc:MGI:4439829]	335	NA	NA	NA	NA	NA	0	0	0	0	0
ENSMUST00000195468.5	ENSMUSG00000076633	Ighv5-2	immunoglobulin heavy variable 5-2 [Source:MGI Symbol;Acc:MGI:4439893]	353	NA	NA	NA	NA	NA	0	0	0	0	0
ENSMUST00000103442.2	ENSMUSG00000076633	Ighv5-2	immunoglobulin heavy variable 5-2 [Source:MGI Symbol;Acc:MGI:4439893]	350	NA	NA	NA	NA	NA	0	0	0	0	0
ENSMUST00000103443.2	ENSMUSG00000096464	Ighv2-2	immunoglobulin heavy variable 2-2 [Source:MGI Symbol;Acc:MGI:4439894]	352	NA	NA	NA	NA	NA	0	0	0	0	0
ENSMUST00000103444.2	ENSMUSG00000095612	Ighv5-4	immunoglobulin heavy variable 5-4 [Source:MGI Symbol;Acc:MGI:4439895]	425	NA	NA	NA	NA	NA	0	0	0	0	0
ENSMUST00000178229.2	ENSMUSG00000094164	Ighv2-3	immunoglobulin heavy variable 2-3 [Source:MGI Symbol;Acc:MGI:4439872]	347	NA	NA	NA	NA	NA	0	0	0	0	0
ENSMUST00000103446.1	ENSMUSG00000094951	Ighv5-6	immunoglobulin heavy variable 5-6 [Source:MGI Symbol;Acc:MGI:4439815]	353	NA	NA	NA	NA	NA	0	0	0	0	0
ENSMUST00000103336.1	ENSMUSG00000076535	Igkv1-88	immunoglobulin kappa chain variable 1-88 [Source:MGI Symbol;Acc:MGI:4439828]	362	NA	NA	NA	NA	NA	0	0	0	0	0
ENSMUST00000198756.1	ENSMUSG00000105630	Gm42543	predicted gene 42543 [Source:MGI Symbol;Acc:MGI:5662680]	353	NA	NA	NA	NA	NA	0	0	0	0	0
ENSMUST00000103447.1	ENSMUSG00000095866	Ighv2-4	immunoglobulin heavy variable V2-4 [Source:MGI Symbol;Acc:MGI:3643263]	350	NA	NA	NA	NA	NA	0	0	0	0	0
ENSMUST00000103448.2	ENSMUSG00000095285	Ighv5-9	immunoglobulin heavy variable 5-9 [Source:MGI Symbol;Acc:MGI:4439873]	418	NA	NA	NA	NA	NA	0	0	0	0	0
ENSMUST00000195707.2	ENSMUSG00000096498	Ighv2-5	immunoglobulin heavy variable 2-5 [Source:MGI Symbol;Acc:MGI:4439517]	480	NA	NA	NA	NA	NA	0	0	0	0	0
ENSMUST00000103449.3	ENSMUSG00000096498	Ighv2-5	immunoglobulin heavy variable 2-5 [Source:MGI Symbol;Acc:MGI:4439517]	347	NA	NA	NA	NA	NA	0	0	0	0	0
ENSMUST00000200454.1	ENSMUSG00000076536	Igkv4-86	immunoglobulin kappa variable 4-86 [Source:MGI Symbol;Acc:MGI:2685305]	378	NA	NA	NA	NA	NA	0	0	0	0	0
ENSMUST00000103337.2	ENSMUSG00000076536	Igkv4-86	immunoglobulin kappa variable 4-86 [Source:MGI Symbol;Acc:MGI:2685305]	340	NA	NA	NA	NA	NA	0	0	0	0	0
ENSMUST00000103450.3	ENSMUSG00000095429	Ighv5-12	immunoglobulin heavy variable 5-12 [Source:MGI Symbol;Acc:MGI:4439516]	353	NA	NA	NA	NA	NA	0	0	0	0	0
ENSMUST00000114212.3	ENSMUSG00000079543	Igkv13-85	immunoglobulin kappa chain variable 13-85 [Source:MGI Symbol;Acc:MGI:4439827]	347	NA	NA	NA	NA	NA	0	0	0	0	0
ENSMUST00000103339.1	ENSMUSG00000076538	Igkv13-84	immunoglobulin kappa chain variable 13-84 [Source:MGI Symbol;Acc:MGI:96514]	347	NA	NA	NA	NA	NA	0	0	0	0	0
ENSMUST00000179657.1	ENSMUSG00000096670	Ighv2-6	immunoglobulin heavy variable 2-6 [Source:MGI Symbol;Acc:MGI:4439518]	350	NA	NA	NA	NA	NA	0	0	0	0	0
ENSMUST00000197966.1	ENSMUSG00000076539	Igkv4-81	immunoglobulin kappa variable 4-81 [Source:MGI Symbol;Acc:MGI:2685306]	358	NA	NA	NA	NA	NA	0	0	0	0	0
ENSMUST00000103340.2	ENSMUSG00000076539	Igkv4-81	immunoglobulin kappa variable 4-81 [Source:MGI Symbol;Acc:MGI:2685306]	290	NA	NA	NA	NA	NA	0	0	0	0	0
ENSMUST00000192264.1	ENSMUSG00000095210	Ighv5-9-1	immunoglobulin heavy variable 5-9-1 [Source:MGI Symbol;Acc:MGI:4439810]	413	NA	NA	NA	NA	NA	0	0	0	0	0
ENSMUST00000103452.2	ENSMUSG00000095210	Ighv5-9-1	immunoglobulin heavy variable 5-9-1 [Source:MGI Symbol;Acc:MGI:4439810]	350	NA	NA	NA	NA	NA	0	0	0	0	0
ENSMUST00000103341.3	ENSMUSG00000076540	Igkv4-80	immunoglobulin kappa variable 4-80 [Source:MGI Symbol;Acc:MGI:4439653]	348	NA	NA	NA	NA	NA	0	0	0	0	0
ENSMUST00000103342.3	ENSMUSG00000076541	Igkv4-79	immunoglobulin kappa variable 4-79 [Source:MGI Symbol;Acc:MGI:2685040]	358	NA	NA	NA	NA	NA	0	0	0	0	0
ENSMUST00000103343.3	ENSMUSG00000094315	Igkv4-78	immunoglobulin kappa variable 4-78 [Source:MGI Symbol;Acc:MGI:3819775]	358	NA	NA	NA	NA	NA	0	0	0	0	0
ENSMUST00000103344.2	ENSMUSG00000076543	Igkv4-74	immunoglobulin kappa variable 4-74 [Source:MGI Symbol;Acc:MGI:3779447]	394	NA	NA	NA	NA	NA	0	0	0	0	0
ENSMUST00000103346.2	ENSMUSG00000076545	Igkv4-72	immunoglobulin kappa chain variable 4-72 [Source:MGI Symbol;Acc:MGI:2686345]	402	NA	NA	NA	NA	NA	0	0	0	0	0
ENSMUST00000196201.1	ENSMUSG00000073028	Igkv4-71	immunoglobulin kappa chain variable 4-71 [Source:MGI Symbol;Acc:MGI:4439654]	352	NA	NA	NA	NA	NA	0	0	0	0	0
ENSMUST00000101325.3	ENSMUSG00000073028	Igkv4-71	immunoglobulin kappa chain variable 4-71 [Source:MGI Symbol;Acc:MGI:4439654]	288	NA	NA	NA	NA	NA	0	0	0	0	0
ENSMUST00000103348.2	ENSMUSG00000076547	Igkv4-70	immunoglobulin kappa chain variable 4-70 [Source:MGI Symbol;Acc:MGI:2686348]	379	NA	NA	NA	NA	NA	0	0	0	0	0
ENSMUST00000103349.1	ENSMUSG00000076548	Igkv4-69	immunoglobulin kappa variable 4-69 [Source:MGI Symbol;Acc:MGI:3648668]	348	NA	NA	NA	NA	NA	0	0	0	0	0
ENSMUST00000103350.2	ENSMUSG00000076549	Igkv4-68	immunoglobulin kappa variable 4-68 [Source:MGI Symbol;Acc:MGI:2686265]	394	NA	NA	NA	NA	NA	0	0	0	0	0
ENSMUST00000195381.1	ENSMUSG00000103033	Ighv5-12-4	immunoglobulin heavy variable 5-12-4 [Source:MGI Symbol;Acc:MGI:3645977]	353	NA	NA	NA	NA	NA	0	0	0	0	0
ENSMUST00000180013.2	ENSMUSG00000095565	Ighv2-9-1	immunoglobulin heavy variable 2-9-1 [Source:MGI Symbol;Acc:MGI:4439519]	369	NA	NA	NA	NA	NA	0	0	0	0	0
ENSMUST00000192911.1	ENSMUSG00000076646	Ighv2-6-8	immunoglobulin heavy variable 2-6-8 [Source:MGI Symbol;Acc:MGI:4439811]	350	NA	NA	NA	NA	NA	0	0	0	0	0
ENSMUST00000103455.2	ENSMUSG00000076646	Ighv2-6-8	immunoglobulin heavy variable 2-6-8 [Source:MGI Symbol;Acc:MGI:4439811]	342	NA	NA	NA	NA	NA	0	0	0	0	0
ENSMUST00000103456.3	ENSMUSG00000096824	Ighv2-7	immunoglobulin heavy variable 2-7 [Source:MGI Symbol;Acc:MGI:4439521]	355	NA	NA	NA	NA	NA	0	0	0	0	0
ENSMUST00000192877.1	ENSMUSG00000094134	Ighv5-15	immunoglobulin heavy variable 5-15 [Source:MGI Symbol;Acc:MGI:4439812]	361	NA	NA	NA	NA	NA	0	0	0	0	0
ENSMUST00000103457.2	ENSMUSG00000094134	Ighv5-15	immunoglobulin heavy variable 5-15 [Source:MGI Symbol;Acc:MGI:4439812]	350	NA	NA	NA	NA	NA	0	0	0	0	0
ENSMUST00000193652.1	ENSMUSG00000094194	Ighv5-16	immunoglobulin heavy variable 5-16 [Source:MGI Symbol;Acc:MGI:4439556]	380	NA	NA	NA	NA	NA	0	0	0	0	0
ENSMUST00000103458.2	ENSMUSG00000094194	Ighv5-16	immunoglobulin heavy variable 5-16 [Source:MGI Symbol;Acc:MGI:4439556]	350	NA	NA	NA	NA	NA	0	0	0	0	0
ENSMUST00000103459.4	ENSMUSG00000095571	Ighv5-17	immunoglobulin heavy variable 5-17 [Source:MGI Symbol;Acc:MGI:4439533]	405	NA	NA	NA	NA	NA	0	0	0	0	0
ENSMUST00000196595.1	ENSMUSG00000076550	Igkv4-63	immunoglobulin kappa variable 4-63 [Source:MGI Symbol;Acc:MGI:3645235]	352	NA	NA	NA	NA	NA	0	0	0	0	0
ENSMUST00000103351.2	ENSMUSG00000076550	Igkv4-63	immunoglobulin kappa variable 4-63 [Source:MGI Symbol;Acc:MGI:3645235]	286	NA	NA	NA	NA	NA	0	0	0	0	0
ENSMUST00000198345.1	ENSMUSG00000094262	Igkv4-62	immunoglobulin kappa variable 4-62 [Source:MGI Symbol;Acc:MGI:3643587]	352	NA	NA	NA	NA	NA	0	0	0	0	0
ENSMUST00000177795.1	ENSMUSG00000094262	Igkv4-62	immunoglobulin kappa variable 4-62 [Source:MGI Symbol;Acc:MGI:3643587]	288	NA	NA	NA	NA	NA	0	0	0	0	0
ENSMUST00000199160.1	ENSMUSG00000076552	Igkv4-61	immunoglobulin kappa chain variable 4-61 [Source:MGI Symbol;Acc:MGI:4439819]	382	NA	NA	NA	NA	NA	0	0	0	0	0
ENSMUST00000103353.2	ENSMUSG00000076552	Igkv4-61	immunoglobulin kappa chain variable 4-61 [Source:MGI Symbol;Acc:MGI:4439819]	284	NA	NA	NA	NA	NA	0	0	0	0	0
ENSMUST00000103354.2	ENSMUSG00000094006	Igkv4-59	immunoglobulin kappa variable 4-59 [Source:MGI Symbol;Acc:MGI:3646808]	368	NA	NA	NA	NA	NA	0	0	0	0	0
ENSMUST00000197448.1	ENSMUSG00000095633	Igkv4-58	immunoglobulin kappa variable 4-58 [Source:MGI Symbol;Acc:MGI:2685923]	358	NA	NA	NA	NA	NA	0	0	0	0	0
ENSMUST00000103355.2	ENSMUSG00000095633	Igkv4-58	immunoglobulin kappa variable 4-58 [Source:MGI Symbol;Acc:MGI:2685923]	292	NA	NA	NA	NA	NA	0	0	0	0	0
ENSMUST00000103451.4	ENSMUSG00000096638	Ighv2-9	immunoglobulin heavy variable 2-9 [Source:MGI Symbol;Acc:MGI:4439624]	362	NA	NA	NA	NA	NA	0	0	0	0	0
ENSMUST00000103474.4	ENSMUSG00000076665	Ighv7-1	immunoglobulin heavy variable 7-1 [Source:MGI Symbol;Acc:MGI:4439622]	363	NA	NA	NA	NA	NA	0	0	0	0	0
ENSMUST00000193133.2	ENSMUSG00000076653	Ighv7-2	immunoglobulin heavy variable 7-2 [Source:MGI Symbol;Acc:MGI:4439623]	357	NA	NA	NA	NA	NA	0	0	0	0	0
ENSMUST00000103462.3	ENSMUSG00000076653	Ighv7-2	immunoglobulin heavy variable 7-2 [Source:MGI Symbol;Acc:MGI:4439623]	354	NA	NA	NA	NA	NA	0	0	0	0	0
ENSMUST00000103463.2	ENSMUSG00000094509	Ighv14-1	immunoglobulin heavy variable 14-1 [Source:MGI Symbol;Acc:MGI:4439920]	351	NA	NA	NA	NA	NA	0	0	0	0	0
ENSMUST00000103464.2	ENSMUSG00000076655	Ighv4-1	immunoglobulin heavy variable 4-1 [Source:MGI Symbol;Acc:MGI:4439536]	414	NA	NA	NA	NA	NA	0	0	0	0	0
ENSMUST00000103478.3	ENSMUSG00000093838	Ighv3-1	immunoglobulin heavy variable 3-1 [Source:MGI Symbol;Acc:MGI:4439534]	350	NA	NA	NA	NA	NA	0	0	0	0	0
ENSMUST00000103466.1	ENSMUSG00000094533	Ighv11-1	immunoglobulin heavy variable 11-1 [Source:MGI Symbol;Acc:MGI:4439535]	353	NA	NA	NA	NA	NA	0	0	0	0	0
ENSMUST00000103356.3	ENSMUSG00000076555	Igkv4-57-1	immunoglobulin kappa variable 4-57-1 [Source:MGI Symbol;Acc:MGI:2686264]	373	NA	NA	NA	NA	NA	0	0	0	0	0
ENSMUST00000103357.3	ENSMUSG00000076556	Igkv4-57	immunoglobulin kappa variable 4-57 [Source:MGI Symbol;Acc:MGI:2685035]	352	NA	NA	NA	NA	NA	0	0	0	0	0
ENSMUST00000103359.2	ENSMUSG00000096833	Igkv4-55	immunoglobulin kappa variable 4-55 [Source:MGI Symbol;Acc:MGI:2686370]	379	NA	NA	NA	NA	NA	0	0	0	0	0
ENSMUST00000103467.1	ENSMUSG00000095583	Ighv14-2	immunoglobulin heavy variable 14-2 [Source:MGI Symbol;Acc:MGI:4439607]	351	NA	NA	NA	NA	NA	0	0	0	0	0
ENSMUST00000103468.2	ENSMUSG00000096108	Ighv11-2	immunoglobulin heavy variable V11-2 [Source:MGI Symbol;Acc:MGI:4947968]	461	NA	NA	NA	NA	NA	0	0	0	0	0
ENSMUST00000103469.3	ENSMUSG00000095642	Ighv14-3	immunoglobulin heavy variable V14-3 [Source:MGI Symbol;Acc:MGI:4439764]	399	NA	NA	NA	NA	NA	0	0	0	0	0
ENSMUST00000195641.1	ENSMUSG00000076661	Ighv16-1	immunoglobulin heavy variable 16-1 [Source:MGI Symbol;Acc:MGI:3643819]	353	NA	NA	NA	NA	NA	0	0	0	0	0
ENSMUST00000103470.1	ENSMUSG00000076661	Ighv16-1	immunoglobulin heavy variable 16-1 [Source:MGI Symbol;Acc:MGI:3643819]	299	NA	NA	NA	NA	NA	0	0	0	0	0
ENSMUST00000195884.1	ENSMUSG00000096805	Ighv9-1	immunoglobulin heavy variable 9-1 [Source:MGI Symbol;Acc:MGI:4439911]	351	NA	NA	NA	NA	NA	0	0	0	0	0
ENSMUST00000103471.1	ENSMUSG00000096805	Ighv9-1	immunoglobulin heavy variable 9-1 [Source:MGI Symbol;Acc:MGI:4439911]	294	NA	NA	NA	NA	NA	0	0	0	0	0
ENSMUST00000103472.3	ENSMUSG00000094102	Ighv9-2	immunoglobulin heavy variable V9-2 [Source:MGI Symbol;Acc:MGI:3643816]	351	NA	NA	NA	NA	NA	0	0	0	0	0
ENSMUST00000103473.1	ENSMUSG00000096459	Ighv9-3	immunoglobulin heavy variable V9-3 [Source:MGI Symbol;Acc:MGI:3642720]	351	NA	NA	NA	NA	NA	0	0	0	0	0
ENSMUST00000103461.4	ENSMUSG00000076652	Ighv7-3	immunoglobulin heavy variable 7-3 [Source:MGI Symbol;Acc:MGI:4439766]	361	NA	NA	NA	NA	NA	0	0	0	0	0
ENSMUST00000195706.1	ENSMUSG00000076666	Ighv14-4	immunoglobulin heavy variable 14-4 [Source:MGI Symbol;Acc:MGI:4439765]	351	NA	NA	NA	NA	NA	0	0	0	0	0
ENSMUST00000103475.1	ENSMUSG00000076666	Ighv14-4	immunoglobulin heavy variable 14-4 [Source:MGI Symbol;Acc:MGI:4439765]	333	NA	NA	NA	NA	NA	0	0	0	0	0
ENSMUST00000191693.1	ENSMUSG00000094029	Ighv3-3	immunoglobulin heavy variable V3-3 [Source:MGI Symbol;Acc:MGI:3643949]	350	NA	NA	NA	NA	NA	0	0	0	0	0
ENSMUST00000103476.1	ENSMUSG00000094029	Ighv3-3	immunoglobulin heavy variable V3-3 [Source:MGI Symbol;Acc:MGI:3643949]	296	NA	NA	NA	NA	NA	0	0	0	0	0
ENSMUST00000192499.2	ENSMUSG00000076668	Ighv7-4	immunoglobulin heavy variable 7-4 [Source:MGI Symbol;Acc:MGI:4439763]	437	NA	NA	NA	NA	NA	0	0	0	0	0
ENSMUST00000103477.3	ENSMUSG00000076668	Ighv7-4	immunoglobulin heavy variable 7-4 [Source:MGI Symbol;Acc:MGI:4439763]	360	NA	NA	NA	NA	NA	0	0	0	0	0
ENSMUST00000193408.1	ENSMUSG00000103939	Ighv3-4	immunoglobulin heavy variable V3-4 [Source:MGI Symbol;Acc:MGI:3644034]	353	NA	NA	NA	NA	NA	0	0	0	0	0
ENSMUST00000195619.1	ENSMUSG00000076670	Ighv3-5	immunoglobulin heavy variable 3-5 [Source:MGI Symbol;Acc:MGI:3648045]	353	NA	NA	NA	NA	NA	0	0	0	0	0
ENSMUST00000103479.3	ENSMUSG00000076670	Ighv3-5	immunoglobulin heavy variable 3-5 [Source:MGI Symbol;Acc:MGI:3648045]	299	NA	NA	NA	NA	NA	0	0	0	0	0
ENSMUST00000195124.5	ENSMUSG00000076672	Ighv3-6	immunoglobulin heavy variable 3-6 [Source:MGI Symbol;Acc:MGI:4439856]	350	NA	NA	NA	NA	NA	0	0	0	0	0
ENSMUST00000103481.2	ENSMUSG00000076672	Ighv3-6	immunoglobulin heavy variable 3-6 [Source:MGI Symbol;Acc:MGI:4439856]	342	NA	NA	NA	NA	NA	0	0	0	0	0
ENSMUST00000194159.1	ENSMUSG00000094322	Ighv9-4	immunoglobulin heavy variable 9-4 [Source:MGI Symbol;Acc:MGI:3646379]	351	NA	NA	NA	NA	NA	0	0	0	0	0
ENSMUST00000103482.1	ENSMUSG00000094322	Ighv9-4	immunoglobulin heavy variable 9-4 [Source:MGI Symbol;Acc:MGI:3646379]	294	NA	NA	NA	NA	NA	0	0	0	0	0
ENSMUST00000103483.2	ENSMUSG00000076674	Ighv3-8	immunoglobulin heavy variable V3-8 [Source:MGI Symbol;Acc:MGI:3645298]	394	NA	NA	NA	NA	NA	0	0	0	0	0
ENSMUST00000125484.2	ENSMUSG00000076671	Ighv13-2	immunoglobulin heavy variable 13-2 [Source:MGI Symbol;Acc:MGI:3705861]	359	NA	NA	NA	NA	NA	0	0	0	0	0
ENSMUST00000183954.3	ENSMUSG00000076671	Ighv13-2	immunoglobulin heavy variable 13-2 [Source:MGI Symbol;Acc:MGI:3705861]	302	NA	NA	NA	NA	NA	0	0	0	0	0
ENSMUST00000103485.2	ENSMUSG00000076676	Ighv12-3	immunoglobulin heavy variable V12-3 [Source:MGI Symbol;Acc:MGI:3646760]	353	NA	NA	NA	NA	NA	0	0	0	0	0
ENSMUST00000103486.1	ENSMUSG00000076677	Ighv6-3	immunoglobulin heavy variable 6-3 [Source:MGI Symbol;Acc:MGI:4439854]	356	NA	NA	NA	NA	NA	0	0	0	0	0
ENSMUST00000191918.1	ENSMUSG00000094174	Ighv6-4	immunoglobulin heavy variable V6-4 [Source:MGI Symbol;Acc:MGI:3704120]	357	NA	NA	NA	NA	NA	0	0	0	0	0
ENSMUST00000177949.1	ENSMUSG00000094174	Ighv6-4	immunoglobulin heavy variable V6-4 [Source:MGI Symbol;Acc:MGI:3704120]	297	NA	NA	NA	NA	NA	0	0	0	0	0
ENSMUST00000193936.1	ENSMUSG00000096407	Ighv6-5	immunoglobulin heavy variable V6-5 [Source:MGI Symbol;Acc:MGI:3647134]	357	NA	NA	NA	NA	NA	0	0	0	0	0
ENSMUST00000179796.1	ENSMUSG00000096407	Ighv6-5	immunoglobulin heavy variable V6-5 [Source:MGI Symbol;Acc:MGI:3647134]	297	NA	NA	NA	NA	NA	0	0	0	0	0
ENSMUST00000103489.1	ENSMUSG00000076680	Ighv6-6	immunoglobulin heavy variable 6-6 [Source:MGI Symbol;Acc:MGI:4439619]	357	NA	NA	NA	NA	NA	0	0	0	0	0
ENSMUST00000193397.1	ENSMUSG00000087582	Ighv6-7	immunoglobulin heavy variable V6-7 [Source:MGI Symbol;Acc:MGI:3644477]	357	NA	NA	NA	NA	NA	0	0	0	0	0
ENSMUST00000195037.1	ENSMUSG00000102301	Ighv8-2	immunoglobulin heavy variable V8-2 [Source:MGI Symbol;Acc:MGI:3647474]	359	NA	NA	NA	NA	NA	0	0	0	0	0
ENSMUST00000103492.1	ENSMUSG00000095981	Ighv10-1	immunoglobulin heavy variable 10-1 [Source:MGI Symbol;Acc:MGI:4439620]	359	NA	NA	NA	NA	NA	0	0	0	0	0
ENSMUST00000103493.2	ENSMUSG00000095442	Ighv1-4	immunoglobulin heavy variable 1-4 [Source:MGI Symbol;Acc:MGI:4439618]	351	NA	NA	NA	NA	NA	0	0	0	0	0
ENSMUST00000191803.1	ENSMUSG00000096499	Ighv1-5	immunoglobulin heavy variable V1-5 [Source:MGI Symbol;Acc:MGI:3704121]	395	NA	NA	NA	NA	NA	0	0	0	0	0
ENSMUST00000103494.1	ENSMUSG00000096499	Ighv1-5	immunoglobulin heavy variable V1-5 [Source:MGI Symbol;Acc:MGI:3704121]	294	NA	NA	NA	NA	NA	0	0	0	0	0
ENSMUST00000103495.2	ENSMUSG00000095700	Ighv10-3	immunoglobulin heavy variable V10-3 [Source:MGI Symbol;Acc:MGI:3648785]	377	NA	NA	NA	NA	NA	0	0	0	0	0
ENSMUST00000103496.3	ENSMUSG00000095200	Ighv1-7	immunoglobulin heavy variable V1-7 [Source:MGI Symbol;Acc:MGI:3704122]	388	NA	NA	NA	NA	NA	0	0	0	0	0
ENSMUST00000195337.1	ENSMUSG00000076688	Ighv15-2	immunoglobulin heavy variable V15-2 [Source:MGI Symbol;Acc:MGI:4947963]	354	NA	NA	NA	NA	NA	0	0	0	0	0
ENSMUST00000103497.1	ENSMUSG00000076688	Ighv15-2	immunoglobulin heavy variable V15-2 [Source:MGI Symbol;Acc:MGI:4947963]	351	NA	NA	NA	NA	NA	0	0	0	0	0
ENSMUST00000193893.5	ENSMUSG00000094694	Ighv1-9	immunoglobulin heavy variable V1-9 [Source:MGI Symbol;Acc:MGI:4439621]	351	NA	NA	NA	NA	NA	0	0	0	0	0
ENSMUST00000103498.2	ENSMUSG00000094694	Ighv1-9	immunoglobulin heavy variable V1-9 [Source:MGI Symbol;Acc:MGI:4439621]	348	NA	NA	NA	NA	NA	0	0	0	0	0
ENSMUST00000191801.1	ENSMUSG00000102888	Ighv1-11	immunoglobulin heavy variable V1-11 [Source:MGI Symbol;Acc:MGI:5009835]	351	NA	NA	NA	NA	NA	0	0	0	0	0
ENSMUST00000195469.5	ENSMUSG00000095416	Ighv1-12	immunoglobulin heavy variable V1-12 [Source:MGI Symbol;Acc:MGI:3646284]	386	NA	NA	NA	NA	NA	0	0	0	0	0
ENSMUST00000109711.3	ENSMUSG00000095416	Ighv1-12	immunoglobulin heavy variable V1-12 [Source:MGI Symbol;Acc:MGI:3646284]	215	NA	NA	NA	NA	NA	0	0	0	0	0
ENSMUST00000103500.1	ENSMUSG00000095416	Ighv1-12	immunoglobulin heavy variable V1-12 [Source:MGI Symbol;Acc:MGI:3646284]	294	NA	NA	NA	NA	NA	0	0	0	0	0
ENSMUST00000192077.1	ENSMUSG00000103254	Ighv1-15	immunoglobulin heavy variable 1-15 [Source:MGI Symbol;Acc:MGI:4439782]	351	NA	NA	NA	NA	NA	0	0	0	0	0
ENSMUST00000103501.2	ENSMUSG00000095554	Ighv1-16	immunoglobulin heavy variable 1-16 [Source:MGI Symbol;Acc:MGI:3647704]	294	NA	NA	NA	NA	NA	0	0	0	0	0
ENSMUST00000194350.5	ENSMUSG00000076695	Ighv1-18	immunoglobulin heavy variable V1-18 [Source:MGI Symbol;Acc:MGI:4439780]	351	NA	NA	NA	NA	NA	0	0	0	0	0
ENSMUST00000103504.2	ENSMUSG00000076695	Ighv1-18	immunoglobulin heavy variable V1-18 [Source:MGI Symbol;Acc:MGI:4439780]	306	NA	NA	NA	NA	NA	0	0	0	0	0
ENSMUST00000193855.1	ENSMUSG00000096410	Ighv1-19	immunoglobulin heavy variable V1-19 [Source:MGI Symbol;Acc:MGI:4439779]	405	NA	NA	NA	NA	NA	0	0	0	0	0
ENSMUST00000103505.2	ENSMUSG00000096410	Ighv1-19	immunoglobulin heavy variable V1-19 [Source:MGI Symbol;Acc:MGI:4439779]	348	NA	NA	NA	NA	NA	0	0	0	0	0
ENSMUST00000194968.5	ENSMUSG00000095761	Ighv1-20	immunoglobulin heavy variable V1-20 [Source:MGI Symbol;Acc:MGI:3644607]	351	NA	NA	NA	NA	NA	0	0	0	0	0
ENSMUST00000103506.2	ENSMUSG00000095761	Ighv1-20	immunoglobulin heavy variable V1-20 [Source:MGI Symbol;Acc:MGI:3644607]	348	NA	NA	NA	NA	NA	0	0	0	0	0
ENSMUST00000103507.1	ENSMUSG00000094561	Ighv1-22	immunoglobulin heavy variable 1-22 [Source:MGI Symbol;Acc:MGI:4439784]	351	NA	NA	NA	NA	NA	0	0	0	0	0
ENSMUST00000103302.2	ENSMUSG00000076501	Igkv2-137	immunoglobulin kappa chain variable 2-137 [Source:MGI Symbol;Acc:MGI:4439879]	501	NA	NA	NA	NA	NA	0	0	0	0	0
ENSMUST00000103303.2	ENSMUSG00000096336	Igkv1-135	immunoglobulin kappa variable 1-135 [Source:MGI Symbol;Acc:MGI:3819952]	394	NA	NA	NA	NA	NA	0	0	0	0	0
ENSMUST00000192554.5	ENSMUSG00000095204	Ighv1-52	immunoglobulin heavy variable 1-52 [Source:MGI Symbol;Acc:MGI:4439752]	351	NA	NA	NA	NA	NA	0	0	0	0	0
ENSMUST00000103522.2	ENSMUSG00000095204	Ighv1-52	immunoglobulin heavy variable 1-52 [Source:MGI Symbol;Acc:MGI:4439752]	348	NA	NA	NA	NA	NA	0	0	0	0	0
ENSMUST00000195945.1	ENSMUSG00000076591	Igkv8-16	immunoglobulin kappa variable 8-16 [Source:MGI Symbol;Acc:MGI:1330843]	379	NA	NA	NA	NA	NA	0	0	0	0	0
ENSMUST00000103392.2	ENSMUSG00000076591	Igkv8-16	immunoglobulin kappa variable 8-16 [Source:MGI Symbol;Acc:MGI:1330843]	362	NA	NA	NA	NA	NA	0	0	0	0	0
ENSMUST00000103393.1	ENSMUSG00000094797	Igkv6-15	immunoglobulin kappa variable 6-15 [Source:MGI Symbol;Acc:MGI:1330831]	347	NA	NA	NA	NA	NA	0	0	0	0	0
ENSMUST00000103394.1	ENSMUSG00000096844	Igkv6-14	immunoglobulin kappa variable 6-14 [Source:MGI Symbol;Acc:MGI:1330830]	347	NA	NA	NA	NA	NA	0	0	0	0	0
ENSMUST00000198184.1	ENSMUSG00000076594	Igkv6-13	immunoglobulin kappa variable 6-13 [Source:MGI Symbol;Acc:MGI:1330829]	359	NA	NA	NA	NA	NA	0	0	0	0	0
ENSMUST00000103395.1	ENSMUSG00000076594	Igkv6-13	immunoglobulin kappa variable 6-13 [Source:MGI Symbol;Acc:MGI:1330829]	287	NA	NA	NA	NA	NA	0	0	0	0	0
ENSMUST00000103523.1	ENSMUSG00000093894	Ighv1-53	immunoglobulin heavy variable 1-53 [Source:MGI Symbol;Acc:MGI:3576502]	351	NA	NA	NA	NA	NA	0	0	0	0	0
ENSMUST00000193145.1	ENSMUSG00000094505	Ighv8-6	immunoglobulin heavy variable V8-6 [Source:MGI Symbol;Acc:MGI:3645823]	354	NA	NA	NA	NA	NA	0	0	0	0	0
ENSMUST00000103524.1	ENSMUSG00000094505	Ighv8-6	immunoglobulin heavy variable V8-6 [Source:MGI Symbol;Acc:MGI:3645823]	301	NA	NA	NA	NA	NA	0	0	0	0	0
ENSMUST00000103525.2	ENSMUSG00000094787	Ighv1-54	immunoglobulin heavy variable V1-54 [Source:MGI Symbol;Acc:MGI:3647133]	377	NA	NA	NA	NA	NA	0	0	0	0	0
ENSMUST00000103526.2	ENSMUSG00000095589	Ighv1-55	immunoglobulin heavy variable 1-55 [Source:MGI Symbol;Acc:MGI:4439716]	415	NA	NA	NA	NA	NA	0	0	0	0	0
ENSMUST00000194071.1	ENSMUSG00000094862	Ighv1-56	immunoglobulin heavy variable 1-56 [Source:MGI Symbol;Acc:MGI:4439715]	351	NA	NA	NA	NA	NA	0	0	0	0	0
ENSMUST00000103527.1	ENSMUSG00000094862	Ighv1-56	immunoglobulin heavy variable 1-56 [Source:MGI Symbol;Acc:MGI:4439715]	294	NA	NA	NA	NA	NA	0	0	0	0	0
ENSMUST00000192591.1	ENSMUSG00000104452	Ighv8-8	immunoglobulin heavy variable 8-8 [Source:MGI Symbol;Acc:MGI:3815333]	358	NA	NA	NA	NA	NA	0	0	0	0	0
ENSMUST00000103529.3	ENSMUSG00000095889	Ighv1-58	immunoglobulin heavy variable 1-58 [Source:MGI Symbol;Acc:MGI:4439557]	351	NA	NA	NA	NA	NA	0	0	0	0	0
ENSMUST00000195359.5	ENSMUSG00000095197	Ighv1-59	immunoglobulin heavy variable V1-59 [Source:MGI Symbol;Acc:MGI:3644474]	351	NA	NA	NA	NA	NA	0	0	0	0	0
ENSMUST00000103530.2	ENSMUSG00000095197	Ighv1-59	immunoglobulin heavy variable V1-59 [Source:MGI Symbol;Acc:MGI:3644474]	348	NA	NA	NA	NA	NA	0	0	0	0	0
ENSMUST00000103396.1	ENSMUSG00000094117	Igkv3-12	immunoglobulin kappa variable 3-12 [Source:MGI Symbol;Acc:MGI:1330815]	359	NA	NA	NA	NA	NA	0	0	0	0	0
ENSMUST00000196940.1	ENSMUSG00000076596	Igkv3-10	immunoglobulin kappa variable 3-10 [Source:MGI Symbol;Acc:MGI:1330821]	359	NA	NA	NA	NA	NA	0	0	0	0	0
ENSMUST00000103397.2	ENSMUSG00000076596	Igkv3-10	immunoglobulin kappa variable 3-10 [Source:MGI Symbol;Acc:MGI:1330821]	356	NA	NA	NA	NA	NA	0	0	0	0	0
ENSMUST00000103398.1	ENSMUSG00000095338	Igkv3-9	immunoglobulin kappa variable 3-9 [Source:MGI Symbol;Acc:MGI:1330856]	359	NA	NA	NA	NA	NA	0	0	0	0	0
ENSMUST00000103531.3	ENSMUSG00000094087	Ighv1-61	immunoglobulin heavy variable 1-61 [Source:MGI Symbol;Acc:MGI:4439824]	351	NA	NA	NA	NA	NA	0	0	0	0	0
ENSMUST00000103503.3	ENSMUSG00000102313	Ighv1-62-1	immunoglobulin heavy variable 1-62-1 [Source:MGI Symbol;Acc:MGI:3704125]	349	NA	NA	NA	NA	NA	0	0	0	0	0
ENSMUST00000171270.1	ENSMUSG00000102313	Ighv1-62-1	immunoglobulin heavy variable 1-62-1 [Source:MGI Symbol;Acc:MGI:3704125]	90	NA	NA	NA	NA	NA	0	0	0	0	0
ENSMUST00000194581.1	ENSMUSG00000096078	Ighv1-62-2	immunoglobulin heavy variable 1-62-2 [Source:MGI Symbol;Acc:MGI:3644968]	378	NA	NA	NA	NA	NA	0	0	0	0	0
ENSMUST00000163467.1	ENSMUSG00000096078	Ighv1-62-2	immunoglobulin heavy variable 1-62-2 [Source:MGI Symbol;Acc:MGI:3644968]	302	NA	NA	NA	NA	NA	0	0	0	0	0
ENSMUST00000103532.2	ENSMUSG00000096767	Ighv1-62-3	immunoglobulin heavy variable 1-62-3 [Source:MGI Symbol;Acc:MGI:3648544]	405	NA	NA	NA	NA	NA	0	0	0	0	0
ENSMUST00000197803.1	ENSMUSG00000095117	Ighv8-9	immunoglobulin heavy variable V8-9 [Source:MGI Symbol;Acc:MGI:3644475]	363	NA	NA	NA	NA	NA	0	0	0	0	0
ENSMUST00000103533.1	ENSMUSG00000095117	Ighv8-9	immunoglobulin heavy variable V8-9 [Source:MGI Symbol;Acc:MGI:3644475]	301	NA	NA	NA	NA	NA	0	0	0	0	0
ENSMUST00000103534.1	ENSMUSG00000096672	Ighv1-63	immunoglobulin heavy variable V1-63 [Source:MGI Symbol;Acc:MGI:3642755]	351	NA	NA	NA	NA	NA	0	0	0	0	0
ENSMUST00000197560.1	ENSMUSG00000076598	Igkv3-7	immunoglobulin kappa variable 3-7 [Source:MGI Symbol;Acc:MGI:1330852]	359	NA	NA	NA	NA	NA	0	0	0	0	0
ENSMUST00000103399.2	ENSMUSG00000076598	Igkv3-7	immunoglobulin kappa variable 3-7 [Source:MGI Symbol;Acc:MGI:1330852]	299	NA	NA	NA	NA	NA	0	0	0	0	0
ENSMUST00000103400.2	ENSMUSG00000095335	Igkv3-5	immunoglobulin kappa chain variable 3-5 [Source:MGI Symbol;Acc:MGI:1330854]	382	NA	NA	NA	NA	NA	0	0	0	0	0
ENSMUST00000103401.2	ENSMUSG00000096715	Igkv3-4	immunoglobulin kappa variable 3-4 [Source:MGI Symbol;Acc:MGI:1330855]	360	NA	NA	NA	NA	NA	0	0	0	0	0
ENSMUST00000103402.1	ENSMUSG00000094478	Igkv3-3	immunoglobulin kappa variable 3-3 [Source:MGI Symbol;Acc:MGI:1330849]	359	NA	NA	NA	NA	NA	0	0	0	0	0
ENSMUST00000103403.2	ENSMUSG00000095351	Igkv3-2	immunoglobulin kappa variable 3-2 [Source:MGI Symbol;Acc:MGI:1330850]	378	NA	NA	NA	NA	NA	0	0	0	0	0
ENSMUST00000103404.1	ENSMUSG00000095682	Igkv3-1	immunoglobulin kappa variable 3-1 [Source:MGI Symbol;Acc:MGI:1330851]	359	NA	NA	NA	NA	NA	0	0	0	0	0
ENSMUST00000103535.2	ENSMUSG00000094088	Ighv1-64	immunoglobulin heavy variable 1-64 [Source:MGI Symbol;Acc:MGI:4439789]	405	NA	NA	NA	NA	NA	0	0	0	0	0
ENSMUST00000103536.3	ENSMUSG00000095170	Ighv8-11	immunoglobulin heavy variable V8-11 [Source:MGI Symbol;Acc:MGI:3644925]	358	NA	NA	NA	NA	NA	0	0	0	0	0
ENSMUST00000103537.2	ENSMUSG00000095519	Ighv1-66	immunoglobulin heavy variable 1-66 [Source:MGI Symbol;Acc:MGI:4439825]	399	NA	NA	NA	NA	NA	0	0	0	0	0
ENSMUST00000198646.1	ENSMUSG00000095863	Ighv1-67	immunoglobulin heavy variable V1-67 [Source:MGI Symbol;Acc:MGI:3645228]	351	NA	NA	NA	NA	NA	0	0	0	0	0
ENSMUST00000103538.2	ENSMUSG00000095863	Ighv1-67	immunoglobulin heavy variable V1-67 [Source:MGI Symbol;Acc:MGI:3645228]	294	NA	NA	NA	NA	NA	0	0	0	0	0
ENSMUST00000199933.4	ENSMUSG00000094502	Ighv1-69	immunoglobulin heavy variable 1-69 [Source:MGI Symbol;Acc:MGI:4439632]	351	NA	NA	NA	NA	NA	0	0	0	0	0
ENSMUST00000103539.2	ENSMUSG00000094502	Ighv1-69	immunoglobulin heavy variable 1-69 [Source:MGI Symbol;Acc:MGI:4439632]	348	NA	NA	NA	NA	NA	0	0	0	0	0
ENSMUST00000199266.1	ENSMUSG00000076731	Ighv8-12	immunoglobulin heavy variable V8-12 [Source:MGI Symbol;Acc:MGI:3642873]	358	NA	NA	NA	NA	NA	0	0	0	0	0
ENSMUST00000103540.2	ENSMUSG00000076731	Ighv8-12	immunoglobulin heavy variable V8-12 [Source:MGI Symbol;Acc:MGI:3642873]	315	NA	NA	NA	NA	NA	0	0	0	0	0
ENSMUST00000196690.1	ENSMUSG00000096577	Ighv1-71	immunoglobulin heavy variable 1-71 [Source:MGI Symbol;Acc:MGI:3643033]	359	NA	NA	NA	NA	NA	0	0	0	0	0
ENSMUST00000166645.1	ENSMUSG00000096577	Ighv1-71	immunoglobulin heavy variable 1-71 [Source:MGI Symbol;Acc:MGI:3643033]	302	NA	NA	NA	NA	NA	0	0	0	0	0
ENSMUST00000103541.2	ENSMUSG00000096074	Ighv1-72	immunoglobulin heavy variable 1-72 [Source:MGI Symbol;Acc:MGI:4439633]	396	NA	NA	NA	NA	NA	0	0	0	0	0
ENSMUST00000164041.2	ENSMUSG00000076733	Ighv8-13	immunoglobulin heavy variable 8-13 [Source:MGI Symbol;Acc:MGI:4439734]	299	NA	NA	NA	NA	NA	0	0	0	0	0
ENSMUST00000103542.1	ENSMUSG00000076733	Ighv8-13	immunoglobulin heavy variable 8-13 [Source:MGI Symbol;Acc:MGI:4439734]	303	NA	NA	NA	NA	NA	0	0	0	0	0
ENSMUST00000196587.4	ENSMUSG00000094124	Ighv1-74	immunoglobulin heavy variable V1-74 [Source:MGI Symbol;Acc:MGI:4439634]	351	NA	NA	NA	NA	NA	0	0	0	0	0
ENSMUST00000103543.2	ENSMUSG00000094124	Ighv1-74	immunoglobulin heavy variable V1-74 [Source:MGI Symbol;Acc:MGI:4439634]	348	NA	NA	NA	NA	NA	0	0	0	0	0
ENSMUST00000103544.2	ENSMUSG00000096020	Ighv1-75	immunoglobulin heavy variable 1-75 [Source:MGI Symbol;Acc:MGI:4439735]	373	NA	NA	NA	NA	NA	0	0	0	0	0
ENSMUST00000197537.1	ENSMUSG00000093896	Ighv1-76	immunoglobulin heavy variable 1-76 [Source:MGI Symbol;Acc:MGI:4439737]	368	NA	NA	NA	NA	NA	0	0	0	0	0
ENSMUST00000169155.1	ENSMUSG00000093896	Ighv1-76	immunoglobulin heavy variable 1-76 [Source:MGI Symbol;Acc:MGI:4439737]	294	NA	NA	NA	NA	NA	0	0	0	0	0
ENSMUST00000198777.1	ENSMUSG00000096452	Ighv1-77	immunoglobulin heavy variable 1-77 [Source:MGI Symbol;Acc:MGI:4439670]	406	NA	NA	NA	NA	NA	0	0	0	0	0
ENSMUST00000170551.1	ENSMUSG00000096452	Ighv1-77	immunoglobulin heavy variable 1-77 [Source:MGI Symbol;Acc:MGI:4439670]	294	NA	NA	NA	NA	NA	0	0	0	0	0
ENSMUST00000199373.1	ENSMUSG00000096326	Ighv1-78	immunoglobulin heavy variable 1-78 [Source:MGI Symbol;Acc:MGI:4439736]	376	NA	NA	NA	NA	NA	0	0	0	0	0
ENSMUST00000163670.1	ENSMUSG00000096326	Ighv1-78	immunoglobulin heavy variable 1-78 [Source:MGI Symbol;Acc:MGI:4439736]	294	NA	NA	NA	NA	NA	0	0	0	0	0
ENSMUST00000103547.1	ENSMUSG00000094075	Ighv1-80	immunoglobulin heavy variable 1-80 [Source:MGI Symbol;Acc:MGI:4439738]	351	NA	NA	NA	NA	NA	0	0	0	0	0
ENSMUST00000103548.2	ENSMUSG00000094689	Ighv1-81	immunoglobulin heavy variable 1-81 [Source:MGI Symbol;Acc:MGI:4439635]	351	NA	NA	NA	NA	NA	0	0	0	0	0
ENSMUST00000196991.1	ENSMUSG00000095127	Ighv1-82	immunoglobulin heavy variable 1-82 [Source:MGI Symbol;Acc:MGI:4439671]	386	NA	NA	NA	NA	NA	0	0	0	0	0
ENSMUST00000103549.1	ENSMUSG00000095127	Ighv1-82	immunoglobulin heavy variable 1-82 [Source:MGI Symbol;Acc:MGI:4439671]	294	NA	NA	NA	NA	NA	0	0	0	0	0
ENSMUST00000103551.1	ENSMUSG00000094940	Ighv1-84	immunoglobulin heavy variable 1-84 [Source:MGI Symbol;Acc:MGI:3644235]	351	NA	NA	NA	NA	NA	0	0	0	0	0
ENSMUST00000103552.1	ENSMUSG00000096150	Ighv1-85	immunoglobulin heavy variable 1-85 [Source:MGI Symbol;Acc:MGI:3645723]	351	NA	NA	NA	NA	NA	0	0	0	0	0
ENSMUST00000103391.3	ENSMUSG00000095794	Igkv6-17	immunoglobulin kappa variable 6-17 [Source:MGI Symbol;Acc:MGI:1330833]	377	NA	NA	NA	NA	NA	0	0	0	0	0
ENSMUST00000103390.2	ENSMUSG00000076589	Igkv8-18	immunoglobulin kappa variable 8-18 [Source:MGI Symbol;Acc:MGI:1330845]	395	NA	NA	NA	NA	NA	0	0	0	0	0
ENSMUST00000198880.4	ENSMUSG00000076570	Igkv12-38	immunoglobulin kappa chain variable 12-38 [Source:MGI Symbol;Acc:MGI:4439614]	347	NA	NA	NA	NA	NA	0	0	0	0	0
ENSMUST00000103371.2	ENSMUSG00000076570	Igkv12-38	immunoglobulin kappa chain variable 12-38 [Source:MGI Symbol;Acc:MGI:4439614]	344	NA	NA	NA	NA	NA	0	0	0	0	0
ENSMUST00000103372.2	ENSMUSG00000076571	Igkv5-37	immunoglobulin kappa variable 5-37 [Source:MGI Symbol;Acc:MGI:2686256]	359	NA	NA	NA	NA	NA	0	0	0	0	0
ENSMUST00000200160.4	ENSMUSG00000076572	Igkv18-36	immunoglobulin kappa chain variable 18-36 [Source:MGI Symbol;Acc:MGI:4439613]	341	NA	NA	NA	NA	NA	0	0	0	0	0
ENSMUST00000103373.2	ENSMUSG00000076572	Igkv18-36	immunoglobulin kappa chain variable 18-36 [Source:MGI Symbol;Acc:MGI:4439613]	344	NA	NA	NA	NA	NA	0	0	0	0	0
ENSMUST00000193950.5	ENSMUSG00000095923	Ighv1-37	immunoglobulin heavy variable 1-37 [Source:MGI Symbol;Acc:MGI:4439640]	351	NA	NA	NA	NA	NA	0	0	0	0	0
ENSMUST00000103514.2	ENSMUSG00000095923	Ighv1-37	immunoglobulin heavy variable 1-37 [Source:MGI Symbol;Acc:MGI:4439640]	348	NA	NA	NA	NA	NA	0	0	0	0	0
ENSMUST00000103515.1	ENSMUSG00000095130	Ighv1-39	immunoglobulin heavy variable 1-39 [Source:MGI Symbol;Acc:MGI:4439888]	351	NA	NA	NA	NA	NA	0	0	0	0	0
ENSMUST00000191868.1	ENSMUSG00000094652	Ighv1-42	immunoglobulin heavy variable V1-42 [Source:MGI Symbol;Acc:MGI:3704123]	351	NA	NA	NA	NA	NA	0	0	0	0	0
ENSMUST00000103516.1	ENSMUSG00000094652	Ighv1-42	immunoglobulin heavy variable V1-42 [Source:MGI Symbol;Acc:MGI:3704123]	294	NA	NA	NA	NA	NA	0	0	0	0	0
ENSMUST00000195417.1	ENSMUSG00000095859	Ighv1-43	immunoglobulin heavy variable V1-43 [Source:MGI Symbol;Acc:MGI:3704124]	351	NA	NA	NA	NA	NA	0	0	0	0	0
ENSMUST00000103517.1	ENSMUSG00000095859	Ighv1-43	immunoglobulin heavy variable V1-43 [Source:MGI Symbol;Acc:MGI:3704124]	294	NA	NA	NA	NA	NA	0	0	0	0	0
ENSMUST00000197820.4	ENSMUSG00000076573	Igkv1-35	immunoglobulin kappa variable 1-35 [Source:MGI Symbol;Acc:MGI:4439612]	362	NA	NA	NA	NA	NA	0	0	0	0	0
ENSMUST00000103374.2	ENSMUSG00000076573	Igkv1-35	immunoglobulin kappa variable 1-35 [Source:MGI Symbol;Acc:MGI:4439612]	359	NA	NA	NA	NA	NA	0	0	0	0	0
ENSMUST00000196959.1	ENSMUSG00000104769	Igkv8-34	immunoglobulin kappa variable 8-34 [Source:MGI Symbol;Acc:MGI:4949914]	365	NA	NA	NA	NA	NA	0	0	0	0	0
ENSMUST00000197429.4	ENSMUSG00000076575	Igkv7-33	immunoglobulin kappa chain variable 7-33 [Source:MGI Symbol;Acc:MGI:3577282]	365	NA	NA	NA	NA	NA	0	0	0	0	0
ENSMUST00000103376.2	ENSMUSG00000076575	Igkv7-33	immunoglobulin kappa chain variable 7-33 [Source:MGI Symbol;Acc:MGI:3577282]	362	NA	NA	NA	NA	NA	0	0	0	0	0
ENSMUST00000103377.2	ENSMUSG00000076576	Igkv6-32	immunoglobulin kappa variable 6-32 [Source:MGI Symbol;Acc:MGI:3641634]	366	NA	NA	NA	NA	NA	0	0	0	0	0
ENSMUST00000103378.2	ENSMUSG00000076577	Igkv8-30	immunoglobulin kappa chain variable 8-30 [Source:MGI Symbol;Acc:MGI:3642250]	368	NA	NA	NA	NA	NA	0	0	0	0	0
ENSMUST00000197371.1	ENSMUSG00000076578	Igkv6-29	immunoglobulin kappa chain variable 6-29 [Source:MGI Symbol;Acc:MGI:4439616]	375	NA	NA	NA	NA	NA	0	0	0	0	0
ENSMUST00000103379.2	ENSMUSG00000076578	Igkv6-29	immunoglobulin kappa chain variable 6-29 [Source:MGI Symbol;Acc:MGI:4439616]	344	NA	NA	NA	NA	NA	0	0	0	0	0
ENSMUST00000197525.1	ENSMUSG00000094356	Igkv8-28	immunoglobulin kappa variable 8-28 [Source:MGI Symbol;Acc:MGI:3642251]	370	NA	NA	NA	NA	NA	0	0	0	0	0
ENSMUST00000103380.2	ENSMUSG00000094356	Igkv8-28	immunoglobulin kappa variable 8-28 [Source:MGI Symbol;Acc:MGI:3642251]	305	NA	NA	NA	NA	NA	0	0	0	0	0
ENSMUST00000197272.1	ENSMUSG00000076580	Igkv8-27	immunoglobulin kappa chain variable 8-27 [Source:MGI Symbol;Acc:MGI:4439868]	360	NA	NA	NA	NA	NA	0	0	0	0	0
ENSMUST00000103381.2	ENSMUSG00000076580	Igkv8-27	immunoglobulin kappa chain variable 8-27 [Source:MGI Symbol;Acc:MGI:4439868]	300	NA	NA	NA	NA	NA	0	0	0	0	0
ENSMUST00000103382.1	ENSMUSG00000076581	Igkv8-26	immunoglobulin kappa variable 8-26 [Source:MGI Symbol;Acc:MGI:4439869]	371	NA	NA	NA	NA	NA	0	0	0	0	0
ENSMUST00000103383.2	ENSMUSG00000094930	Igkv6-25	immunoglobulin kappa chain variable 6-25 [Source:MGI Symbol;Acc:MGI:4439867]	380	NA	NA	NA	NA	NA	0	0	0	0	0
ENSMUST00000103384.1	ENSMUSG00000076583	Igkv8-24	immunoglobulin kappa chain variable 8-24 [Source:MGI Symbol;Acc:MGI:4947958]	365	NA	NA	NA	NA	NA	0	0	0	0	0
ENSMUST00000196275.1	ENSMUSG00000105432	Gm43218	predicted gene 43218 [Source:MGI Symbol;Acc:MGI:5663355]	344	NA	NA	NA	NA	NA	0	0	0	0	0
ENSMUST00000103386.2	ENSMUSG00000095630	Igkv6-23	immunoglobulin kappa variable 6-23 [Source:MGI Symbol;Acc:MGI:3711980]	369	NA	NA	NA	NA	NA	0	0	0	0	0
ENSMUST00000103751.2	ENSMUSG00000076939	Iglv3	immunoglobulin lambda variable 3 [Source:MGI Symbol;Acc:MGI:3645509]	381	NA	NA	NA	NA	NA	0	0	0	0	0
ENSMUST00000103387.2	ENSMUSG00000076586	Igkv8-21	immunoglobulin kappa variable 8-21 [Source:MGI Symbol;Acc:MGI:1330840]	382	NA	NA	NA	NA	NA	0	0	0	0	0
ENSMUST00000103388.3	ENSMUSG00000076587	Igkv6-20	immunoglobulin kappa variable 6-20 [Source:MGI Symbol;Acc:MGI:1330836]	375	NA	NA	NA	NA	NA	0	0	0	0	0
ENSMUST00000194865.1	ENSMUSG00000076709	Ighv1-47	immunoglobulin heavy variable 1-47 [Source:MGI Symbol;Acc:MGI:4439890]	397	NA	NA	NA	NA	NA	0	0	0	0	0
ENSMUST00000103518.1	ENSMUSG00000076709	Ighv1-47	immunoglobulin heavy variable 1-47 [Source:MGI Symbol;Acc:MGI:4439890]	294	NA	NA	NA	NA	NA	0	0	0	0	0
ENSMUST00000197518.1	ENSMUSG00000076940	Iglv2	immunoglobulin lambda variable 2 [Source:MGI Symbol;Acc:MGI:99548]	366	NA	NA	NA	NA	NA	0	0	0	0	0
ENSMUST00000103752.2	ENSMUSG00000076940	Iglv2	immunoglobulin lambda variable 2 [Source:MGI Symbol;Acc:MGI:99548]	348	NA	NA	NA	NA	NA	0	0	0	0	0
ENSMUST00000192298.1	ENSMUSG00000096355	Ighv8-4	immunoglobulin heavy variable V8-4 [Source:MGI Symbol;Acc:MGI:3646040]	351	NA	NA	NA	NA	NA	0	0	0	0	0
ENSMUST00000178949.1	ENSMUSG00000096355	Ighv8-4	immunoglobulin heavy variable V8-4 [Source:MGI Symbol;Acc:MGI:3646040]	294	NA	NA	NA	NA	NA	0	0	0	0	0
ENSMUST00000192724.1	ENSMUSG00000076710	Ighv1-49	immunoglobulin heavy variable 1-49 [Source:MGI Symbol;Acc:MGI:4439754]	351	NA	NA	NA	NA	NA	0	0	0	0	0
ENSMUST00000103519.1	ENSMUSG00000076710	Ighv1-49	immunoglobulin heavy variable 1-49 [Source:MGI Symbol;Acc:MGI:4439754]	294	NA	NA	NA	NA	NA	0	0	0	0	0
ENSMUST00000194257.1	ENSMUSG00000102364	Ighv8-5	immunoglobulin heavy variable V8-5 [Source:MGI Symbol;Acc:MGI:3645478]	358	NA	NA	NA	NA	NA	0	0	0	0	0
ENSMUST00000103521.2	ENSMUSG00000094198	Ighv1-50	immunoglobulin heavy variable 1-50 [Source:MGI Symbol;Acc:MGI:4439753]	390	NA	NA	NA	NA	NA	0	0	0	0	0
ENSMUST00000196599.1	ENSMUSG00000096594	Igkv8-19	immunoglobulin kappa variable 8-19 [Source:MGI Symbol;Acc:MGI:1330844]	370	NA	NA	NA	NA	NA	0	0	0	0	0
ENSMUST00000103389.2	ENSMUSG00000096594	Igkv8-19	immunoglobulin kappa variable 8-19 [Source:MGI Symbol;Acc:MGI:1330844]	305	NA	NA	NA	NA	NA	0	0	0	0	0
ENSMUST00000197290.1	ENSMUSG00000076569	Igkv5-39	immunoglobulin kappa variable 5-39 [Source:MGI Symbol;Acc:MGI:2686255]	347	NA	NA	NA	NA	NA	0	0	0	0	0
ENSMUST00000103370.2	ENSMUSG00000076569	Igkv5-39	immunoglobulin kappa variable 5-39 [Source:MGI Symbol;Acc:MGI:2686255]	287	NA	NA	NA	NA	NA	0	0	0	0	0
ENSMUST00000103746.2	ENSMUSG00000076934	Iglv1	immunoglobulin lambda variable 1 [Source:MGI Symbol;Acc:MGI:96530]	391	NA	NA	NA	NA	NA	0	0	0	0	0
ENSMUST00000194625.1	ENSMUSG00000103290	Ighv1-23	immunoglobulin heavy variable V1-23 [Source:MGI Symbol;Acc:MGI:3815050]	351	NA	NA	NA	NA	NA	0	0	0	0	0
ENSMUST00000199437.1	ENSMUSG00000094319	Igkv4-54	immunoglobulin kappa chain variable 4-54 [Source:MGI Symbol;Acc:MGI:5009821]	352	NA	NA	NA	NA	NA	0	0	0	0	0
ENSMUST00000177697.1	ENSMUSG00000094319	Igkv4-54	immunoglobulin kappa chain variable 4-54 [Source:MGI Symbol;Acc:MGI:5009821]	288	NA	NA	NA	NA	NA	0	0	0	0	0
ENSMUST00000198328.1	ENSMUSG00000095753	Igkv4-53	immunoglobulin kappa variable 4-53 [Source:MGI Symbol;Acc:MGI:2686266]	367	NA	NA	NA	NA	NA	0	0	0	0	0
ENSMUST00000166380.1	ENSMUSG00000095753	Igkv4-53	immunoglobulin kappa variable 4-53 [Source:MGI Symbol;Acc:MGI:2686266]	292	NA	NA	NA	NA	NA	0	0	0	0	0
ENSMUST00000103345.3	ENSMUSG00000094993	Igkv4-51	immunoglobulin kappa chain variable 4-51 [Source:MGI Symbol;Acc:MGI:5009829]	394	NA	NA	NA	NA	NA	0	0	0	0	0
ENSMUST00000103363.1	ENSMUSG00000076562	Igkv4-50	immunoglobulin kappa variable 4-50 [Source:MGI Symbol;Acc:MGI:2685915]	352	NA	NA	NA	NA	NA	0	0	0	0	0
ENSMUST00000103364.2	ENSMUSG00000076563	Igkv5-48	immunoglobulin kappa variable 5-48 [Source:MGI Symbol;Acc:MGI:3642817]	360	NA	NA	NA	NA	NA	0	0	0	0	0
ENSMUST00000191861.1	ENSMUSG00000094241	Ighv1-24	immunoglobulin heavy variable V1-24 [Source:MGI Symbol;Acc:MGI:3815052]	351	NA	NA	NA	NA	NA	0	0	0	0	0
ENSMUST00000103509.1	ENSMUSG00000094241	Ighv1-24	immunoglobulin heavy variable V1-24 [Source:MGI Symbol;Acc:MGI:3815052]	294	NA	NA	NA	NA	NA	0	0	0	0	0
ENSMUST00000103365.2	ENSMUSG00000076564	Igkv12-46	immunoglobulin kappa variable 12-46 [Source:MGI Symbol;Acc:MGI:4439773]	377	NA	NA	NA	NA	NA	0	0	0	0	0
ENSMUST00000103366.2	ENSMUSG00000094094	Igkv5-45	immunoglobulin kappa chain variable 5-45 [Source:MGI Symbol;Acc:MGI:4439774]	385	NA	NA	NA	NA	NA	0	0	0	0	0
ENSMUST00000103510.1	ENSMUSG00000094546	Ighv1-26	immunoglobulin heavy variable 1-26 [Source:MGI Symbol;Acc:MGI:4439641]	351	NA	NA	NA	NA	NA	0	0	0	0	0
ENSMUST00000103367.2	ENSMUSG00000096422	Igkv12-44	immunoglobulin kappa variable 12-44 [Source:MGI Symbol;Acc:MGI:4439775]	401	NA	NA	NA	NA	NA	0	0	0	0	0
ENSMUST00000195735.1	ENSMUSG00000096649	Ighv1-31	immunoglobulin heavy variable 1-31 [Source:MGI Symbol;Acc:MGI:4439889]	351	NA	NA	NA	NA	NA	0	0	0	0	0
ENSMUST00000103511.1	ENSMUSG00000096649	Ighv1-31	immunoglobulin heavy variable 1-31 [Source:MGI Symbol;Acc:MGI:4439889]	294	NA	NA	NA	NA	NA	0	0	0	0	0
ENSMUST00000103512.2	ENSMUSG00000093955	Ighv1-34	immunoglobulin heavy variable 1-34 [Source:MGI Symbol;Acc:MGI:4439659]	388	NA	NA	NA	NA	NA	0	0	0	0	0
ENSMUST00000103368.2	ENSMUSG00000094433	Igkv5-43	immunoglobulin kappa chain variable 5-43 [Source:MGI Symbol;Acc:MGI:4943320]	379	NA	NA	NA	NA	NA	0	0	0	0	0
ENSMUST00000103369.1	ENSMUSG00000095007	Igkv12-41	immunoglobulin kappa chain variable 12-41 [Source:MGI Symbol;Acc:MGI:4439772]	347	NA	NA	NA	NA	NA	0	0	0	0	0
ENSMUST00000191862.5	ENSMUSG00000094051	Ighv1-36	immunoglobulin heavy variable 1-36 [Source:MGI Symbol;Acc:MGI:4439639]	351	NA	NA	NA	NA	NA	0	0	0	0	0
ENSMUST00000103513.2	ENSMUSG00000094051	Ighv1-36	immunoglobulin heavy variable 1-36 [Source:MGI Symbol;Acc:MGI:4439639]	348	NA	NA	NA	NA	NA	0	0	0	0	0
ENSMUST00000167638.1	ENSMUSG00000091008	Gm17472	predicted gene, 17472 [Source:MGI Symbol;Acc:MGI:4937106]	352	NA	NA	NA	NA	NA	0	0	0	0	0
ENSMUST00000095364.2	ENSMUSG00000090765	Ighv1-13	immunoglobulin heavy variable V1-13 [Source:MGI Symbol;Acc:MGI:5009907]	294	NA	NA	NA	NA	NA	0	0	0	0	0
ENSMUST00000166255.1	ENSMUSG00000090395	Ighv5-8	immunoglobulin heavy variable V5-8 [Source:MGI Symbol;Acc:MGI:5009890]	278	NA	NA	NA	NA	NA	0	0	0	0	0
ENSMUST00000103301.2	ENSMUSG00000076500	Gm20730	predicted gene, 20730 [Source:MGI Symbol;Acc:MGI:5313039]	359	NA	NA	NA	NA	NA	0	0	0	0	0
ENSMUST00000103682.2	ENSMUSG00000076870	Trdj1	T cell receptor delta joining 1 [Source:MGI Symbol;Acc:MGI:4819753]	51	NA	NA	NA	NA	NA	0	0	0	0	0
ENSMUST00000103683.1	ENSMUSG00000076871	Trdj2	T cell receptor delta joining 2 [Source:MGI Symbol;Acc:MGI:4887422]	59	NA	NA	NA	NA	NA	0	0	0	0	0
ENSMUST00000197589.1	ENSMUSG00000076874	Traj59	T cell receptor alpha joining 59 [Source:MGI Symbol;Acc:MGI:4439694]	62	NA	NA	NA	NA	NA	0	0	0	0	0
ENSMUST00000103686.1	ENSMUSG00000076874	Traj59	T cell receptor alpha joining 59 [Source:MGI Symbol;Acc:MGI:4439694]	64	NA	NA	NA	NA	NA	0	0	0	0	0
ENSMUST00000103687.1	ENSMUSG00000076875	Traj58	T cell receptor alpha joining 58 [Source:MGI Symbol;Acc:MGI:4439695]	63	NA	NA	NA	NA	NA	0	0	0	0	0
ENSMUST00000196977.1	ENSMUSG00000076876	Traj57	T cell receptor alpha joining 57 [Source:MGI Symbol;Acc:MGI:4439692]	63	NA	NA	NA	NA	NA	0	0	0	0	0
ENSMUST00000103688.2	ENSMUSG00000076876	Traj57	T cell receptor alpha joining 57 [Source:MGI Symbol;Acc:MGI:4439692]	65	NA	NA	NA	NA	NA	0	0	0	0	0
ENSMUST00000103689.1	ENSMUSG00000076877	Traj56	T cell receptor alpha joining 56 [Source:MGI Symbol;Acc:MGI:4439693]	63	NA	NA	NA	NA	NA	0	0	0	0	0
ENSMUST00000103690.1	ENSMUSG00000076878	Traj53	T cell receptor alpha joining 53 [Source:MGI Symbol;Acc:MGI:4439696]	66	NA	NA	NA	NA	NA	0	0	0	0	0
ENSMUST00000103691.1	ENSMUSG00000076879	Traj52	T cell receptor alpha joining 52 [Source:MGI Symbol;Acc:MGI:4439697]	66	NA	NA	NA	NA	NA	0	0	0	0	0
ENSMUST00000103693.1	ENSMUSG00000076881	Traj50	T cell receptor alpha joining 50 [Source:MGI Symbol;Acc:MGI:4440517]	63	NA	NA	NA	NA	NA	0	0	0	0	0
ENSMUST00000199452.1	ENSMUSG00000076882	Traj49	T cell receptor alpha joining 49 [Source:MGI Symbol;Acc:MGI:4440527]	62	NA	NA	NA	NA	NA	0	0	0	0	0
ENSMUST00000103694.2	ENSMUSG00000076882	Traj49	T cell receptor alpha joining 49 [Source:MGI Symbol;Acc:MGI:4440527]	59	NA	NA	NA	NA	NA	0	0	0	0	0
ENSMUST00000200046.1	ENSMUSG00000076883	Traj48	T cell receptor alpha joining 48 [Source:MGI Symbol;Acc:MGI:4439847]	61	NA	NA	NA	NA	NA	0	0	0	0	0
ENSMUST00000103695.1	ENSMUSG00000076883	Traj48	T cell receptor alpha joining 48 [Source:MGI Symbol;Acc:MGI:4439847]	60	NA	NA	NA	NA	NA	0	0	0	0	0
ENSMUST00000197949.1	ENSMUSG00000105216	Traj47	T cell receptor alpha joining 47 [Source:MGI Symbol;Acc:MGI:5009961]	57	NA	NA	NA	NA	NA	0	0	0	0	0
ENSMUST00000103696.1	ENSMUSG00000076884	Traj46	T cell receptor alpha joining 46 [Source:MGI Symbol;Acc:MGI:4439852]	63	NA	NA	NA	NA	NA	0	0	0	0	0
ENSMUST00000103697.1	ENSMUSG00000076885	Traj45	T cell receptor alpha joining 45 [Source:MGI Symbol;Acc:MGI:4439851]	63	NA	NA	NA	NA	NA	0	0	0	0	0
ENSMUST00000103698.1	ENSMUSG00000076886	Traj44	T cell receptor alpha joining 44 [Source:MGI Symbol;Acc:MGI:4439850]	61	NA	NA	NA	NA	NA	0	0	0	0	0
ENSMUST00000103699.1	ENSMUSG00000076887	Traj43	T cell receptor alpha joining 43 [Source:MGI Symbol;Acc:MGI:4439849]	57	NA	NA	NA	NA	NA	0	0	0	0	0
ENSMUST00000103700.1	ENSMUSG00000076888	Traj42	T cell receptor alpha joining 42 [Source:MGI Symbol;Acc:MGI:4439846]	64	NA	NA	NA	NA	NA	0	0	0	0	0
ENSMUST00000103701.1	ENSMUSG00000076889	Traj41	T cell receptor alpha joining 41 [Source:MGI Symbol;Acc:MGI:4439845]	55	NA	NA	NA	NA	NA	0	0	0	0	0
ENSMUST00000103702.1	ENSMUSG00000076890	Traj40	T cell receptor alpha joining 40 [Source:MGI Symbol;Acc:MGI:4439592]	61	NA	NA	NA	NA	NA	0	0	0	0	0
ENSMUST00000103703.1	ENSMUSG00000076891	Traj39	T cell receptor alpha joining 39 [Source:MGI Symbol;Acc:MGI:4439593]	63	NA	NA	NA	NA	NA	0	0	0	0	0
ENSMUST00000103704.1	ENSMUSG00000076892	Traj38	T cell receptor alpha joining 38 [Source:MGI Symbol;Acc:MGI:4439594]	62	NA	NA	NA	NA	NA	0	0	0	0	0
ENSMUST00000103705.1	ENSMUSG00000076893	Traj37	T cell receptor alpha joining 37 [Source:MGI Symbol;Acc:MGI:4439595]	60	NA	NA	NA	NA	NA	0	0	0	0	0
ENSMUST00000103706.1	ENSMUSG00000076894	Traj35	T cell receptor alpha joining 35 [Source:MGI Symbol;Acc:MGI:4439588]	65	NA	NA	NA	NA	NA	0	0	0	0	0
ENSMUST00000103707.1	ENSMUSG00000076895	Traj34	T cell receptor alpha joining 34 [Source:MGI Symbol;Acc:MGI:4439589]	58	NA	NA	NA	NA	NA	0	0	0	0	0
ENSMUST00000103708.1	ENSMUSG00000076896	Traj33	T cell receptor alpha joining 33 [Source:MGI Symbol;Acc:MGI:4439590]	57	NA	NA	NA	NA	NA	0	0	0	0	0
ENSMUST00000103709.1	ENSMUSG00000076897	Traj32	T cell receptor alpha joining 32 [Source:MGI Symbol;Acc:MGI:4439591]	66	NA	NA	NA	NA	NA	0	0	0	0	0
ENSMUST00000103710.1	ENSMUSG00000076898	Traj31	T cell receptor alpha joining 31 [Source:MGI Symbol;Acc:MGI:4440519]	57	NA	NA	NA	NA	NA	0	0	0	0	0
ENSMUST00000103711.1	ENSMUSG00000076899	Traj30	T cell receptor alpha joining 30 [Source:MGI Symbol;Acc:MGI:4439596]	59	NA	NA	NA	NA	NA	0	0	0	0	0
ENSMUST00000103712.1	ENSMUSG00000076900	Traj29	T cell receptor alpha joining 29 [Source:MGI Symbol;Acc:MGI:4439743]	60	NA	NA	NA	NA	NA	0	0	0	0	0
ENSMUST00000103713.1	ENSMUSG00000076901	Traj28	T cell receptor alpha joining 28 [Source:MGI Symbol;Acc:MGI:4439744]	65	NA	NA	NA	NA	NA	0	0	0	0	0
ENSMUST00000103714.1	ENSMUSG00000076902	Traj27	T cell receptor alpha joining 27 [Source:MGI Symbol;Acc:MGI:4439741]	59	NA	NA	NA	NA	NA	0	0	0	0	0
ENSMUST00000103715.1	ENSMUSG00000076903	Traj26	T cell receptor alpha joining 26 [Source:MGI Symbol;Acc:MGI:4439742]	60	NA	NA	NA	NA	NA	0	0	0	0	0
ENSMUST00000103716.2	ENSMUSG00000076904	Traj25	T cell receptor alpha joining 25 [Source:MGI Symbol;Acc:MGI:4439747]	57	NA	NA	NA	NA	NA	0	0	0	0	0
ENSMUST00000103717.2	ENSMUSG00000076905	Traj24	T cell receptor alpha joining 24 [Source:MGI Symbol;Acc:MGI:4439748]	63	NA	NA	NA	NA	NA	0	0	0	0	0
ENSMUST00000103718.1	ENSMUSG00000076906	Traj23	T cell receptor alpha joining 23 [Source:MGI Symbol;Acc:MGI:4439745]	60	NA	NA	NA	NA	NA	0	0	0	0	0
ENSMUST00000103719.1	ENSMUSG00000076907	Traj22	T cell receptor alpha joining 22 [Source:MGI Symbol;Acc:MGI:4439746]	60	NA	NA	NA	NA	NA	0	0	0	0	0
ENSMUST00000103720.1	ENSMUSG00000076908	Traj21	T cell receptor alpha joining 21 [Source:MGI Symbol;Acc:MGI:4439739]	57	NA	NA	NA	NA	NA	0	0	0	0	0
ENSMUST00000103721.2	ENSMUSG00000076909	Traj20	T cell receptor alpha joining 20 [Source:MGI Symbol;Acc:MGI:4439740]	58	NA	NA	NA	NA	NA	0	0	0	0	0
ENSMUST00000103722.1	ENSMUSG00000076910	Traj19	T cell receptor alpha joining 19 [Source:MGI Symbol;Acc:MGI:4439579]	61	NA	NA	NA	NA	NA	0	0	0	0	0
ENSMUST00000103723.1	ENSMUSG00000076911	Traj18	T cell receptor alpha joining 18 [Source:MGI Symbol;Acc:MGI:4440521]	66	NA	NA	NA	NA	NA	0	0	0	0	0
ENSMUST00000103724.1	ENSMUSG00000076912	Traj17	T cell receptor alpha joining 17 [Source:MGI Symbol;Acc:MGI:4440523]	63	NA	NA	NA	NA	NA	0	0	0	0	0
ENSMUST00000103725.1	ENSMUSG00000076913	Traj16	T cell receptor alpha joining 16 [Source:MGI Symbol;Acc:MGI:4439580]	61	NA	NA	NA	NA	NA	0	0	0	0	0
ENSMUST00000103726.1	ENSMUSG00000076914	Traj15	T cell receptor alpha joining 15 [Source:MGI Symbol;Acc:MGI:4439582]	60	NA	NA	NA	NA	NA	0	0	0	0	0
ENSMUST00000103728.1	ENSMUSG00000076916	Traj13	T cell receptor alpha joining 13 [Source:MGI Symbol;Acc:MGI:4439584]	57	NA	NA	NA	NA	NA	0	0	0	0	0
ENSMUST00000103729.1	ENSMUSG00000076917	Traj12	T cell receptor alpha joining 12 [Source:MGI Symbol;Acc:MGI:4439583]	58	NA	NA	NA	NA	NA	0	0	0	0	0
ENSMUST00000103730.1	ENSMUSG00000076918	Traj11	T cell receptor alpha joining 11 [Source:MGI Symbol;Acc:MGI:4439578]	59	NA	NA	NA	NA	NA	0	0	0	0	0
ENSMUST00000103731.1	ENSMUSG00000076919	Traj9	T cell receptor alpha joining 9 [Source:MGI Symbol;Acc:MGI:4439577]	58	NA	NA	NA	NA	NA	0	0	0	0	0
ENSMUST00000103733.1	ENSMUSG00000076921	Traj7	T cell receptor alpha joining 7 [Source:MGI Symbol;Acc:MGI:4439843]	59	NA	NA	NA	NA	NA	0	0	0	0	0
ENSMUST00000103734.1	ENSMUSG00000076922	Traj6	T cell receptor alpha joining 6 [Source:MGI Symbol;Acc:MGI:4439844]	62	NA	NA	NA	NA	NA	0	0	0	0	0
ENSMUST00000103735.1	ENSMUSG00000076923	Traj5	T cell receptor alpha joining 5 [Source:MGI Symbol;Acc:MGI:4840258]	62	NA	NA	NA	NA	NA	0	0	0	0	0
ENSMUST00000103736.1	ENSMUSG00000076924	Traj4	T cell receptor alpha joining 4 [Source:MGI Symbol;Acc:MGI:4439839]	63	NA	NA	NA	NA	NA	0	0	0	0	0
ENSMUST00000103737.2	ENSMUSG00000076925	Traj3	T cell receptor alpha joining 3 [Source:MGI Symbol;Acc:MGI:4439840]	66	NA	NA	NA	NA	NA	0	0	0	0	0
ENSMUST00000103738.1	ENSMUSG00000076926	Traj2	T cell receptor alpha joining 2 [Source:MGI Symbol;Acc:MGI:4840255]	66	NA	NA	NA	NA	NA	0	0	0	0	0
ENSMUST00000200495.1	ENSMUSG00000104962	Trgj1	T cell receptor gamma joining 1 [Source:MGI Symbol;Acc:MGI:4440480]	60	NA	NA	NA	NA	NA	0	0	0	0	0
ENSMUST00000103562.2	ENSMUSG00000104630	Trgj3	T cell receptor gamma joining 3 [Source:MGI Symbol;Acc:MGI:4439528]	60	NA	NA	NA	NA	NA	0	0	0	0	0
ENSMUST00000197113.1	ENSMUSG00000105830	Trgj2	T cell receptor gamma joining 2 [Source:MGI Symbol;Acc:MGI:4439598]	60	NA	NA	NA	NA	NA	0	0	0	0	0
ENSMUST00000184430.1	ENSMUSG00000098799	Trgj4	T cell receptor gamma joining 4 [Source:MGI Symbol;Acc:MGI:4439597]	61	NA	NA	NA	NA	NA	0	0	0	0	0
ENSMUST00000103284.1	ENSMUSG00000076483	Trbj1-1	T cell receptor beta joining 1-1 [Source:MGI Symbol;Acc:MGI:4439570]	48	NA	NA	NA	NA	NA	0	0	0	0	0
ENSMUST00000103285.1	ENSMUSG00000076484	Trbj1-2	T cell receptor beta joining 1-2 [Source:MGI Symbol;Acc:MGI:4439569]	48	NA	NA	NA	NA	NA	0	0	0	0	0
ENSMUST00000192366.1	ENSMUSG00000076485	Trbj1-3	T cell receptor beta joining 1-3 [Source:MGI Symbol;Acc:MGI:4439568]	50	NA	NA	NA	NA	NA	0	0	0	0	0
ENSMUST00000103286.1	ENSMUSG00000076485	Trbj1-3	T cell receptor beta joining 1-3 [Source:MGI Symbol;Acc:MGI:4439568]	54	NA	NA	NA	NA	NA	0	0	0	0	0
ENSMUST00000103287.1	ENSMUSG00000076486	Trbj1-4	T cell receptor beta joining 1-4 [Source:MGI Symbol;Acc:MGI:4439567]	51	NA	NA	NA	NA	NA	0	0	0	0	0
ENSMUST00000103288.1	ENSMUSG00000076487	Trbj1-5	T cell receptor beta joining 1-5 [Source:MGI Symbol;Acc:MGI:4439566]	50	NA	NA	NA	NA	NA	0	0	0	0	0
ENSMUST00000103289.1	ENSMUSG00000076488	Trbj1-6	T cell receptor beta joining 1-6 [Source:MGI Symbol;Acc:MGI:4439575]	53	NA	NA	NA	NA	NA	0	0	0	0	0
ENSMUST00000193061.1	ENSMUSG00000076489	Trbj1-7	T cell receptor beta joining 1-7 [Source:MGI Symbol;Acc:MGI:4439574]	46	NA	NA	NA	NA	NA	0	0	0	0	0
ENSMUST00000103290.1	ENSMUSG00000076489	Trbj1-7	T cell receptor beta joining 1-7 [Source:MGI Symbol;Acc:MGI:4439574]	45	NA	NA	NA	NA	NA	0	0	0	0	0
ENSMUST00000103293.1	ENSMUSG00000076492	Trbj2-1	T cell receptor beta joining 2-1 [Source:MGI Symbol;Acc:MGI:4439728]	50	NA	NA	NA	NA	NA	0	0	0	0	0
ENSMUST00000103294.1	ENSMUSG00000076493	Trbj2-2	T cell receptor beta joining 2-2 [Source:MGI Symbol;Acc:MGI:4439729]	51	NA	195.5	NA	127	NA	0	2	0	1	0
ENSMUST00000103295.1	ENSMUSG00000076494	Trbj2-3	T cell receptor beta joining 2-3 [Source:MGI Symbol;Acc:MGI:4439898]	49	NA	NA	NA	NA	NA	0	0	0	0	0
ENSMUST00000103296.1	ENSMUSG00000076495	Trbj2-4	T cell receptor beta joining 2-4 [Source:MGI Symbol;Acc:MGI:4439730]	49	NA	NA	NA	NA	NA	0	0	0	0	0
ENSMUST00000103297.1	ENSMUSG00000076496	Trbj2-5	T cell receptor beta joining 2-5 [Source:MGI Symbol;Acc:MGI:4439899]	49	NA	NA	NA	NA	NA	0	0	0	0	0
ENSMUST00000103298.1	ENSMUSG00000076497	Trbj2-7	T cell receptor beta joining 2-7 [Source:MGI Symbol;Acc:MGI:4439731]	47	NA	NA	NA	NA	NA	0	0	0	0	0
ENSMUST00000082421.1	ENSMUSG00000064370	mt-Cytb	mitochondrially encoded cytochrome b [Source:MGI Symbol;Acc:MGI:102501]	1144	72.5215289052022	73.1340402246263	75.2354623796075	74.1255492059845	75.4827781715095	56668	55737	55236	34823	49385
ENSMUST00000082419.1	ENSMUSG00000064368	mt-Nd6	mitochondrially encoded NADH dehydrogenase 6 [Source:MGI Symbol;Acc:MGI:102495]	519	58.8105864037363	59.0945870535714	62.7601254246145	60.2122954444935	63.994021919628	3854	3584	3827	2261	3011
ENSMUST00000082418.1	ENSMUSG00000064367	mt-Nd5	mitochondrially encoded NADH dehydrogenase 5 [Source:MGI Symbol;Acc:MGI:102496]	1824	69.2549941245593	70.0127538970241	71.6210832587287	70.034470872113	71.56	4255	4234	4468	2901	3925
ENSMUST00000082414.1	ENSMUSG00000064363	mt-Nd4	mitochondrially encoded NADH dehydrogenase 4 [Source:MGI Symbol;Acc:MGI:102498]	1378	64.7373855053832	65.4355967467372	66.9859758724687	65.4815000333934	67.1609096284616	49784	47583	46420	29946	40588
ENSMUST00000084013.1	ENSMUSG00000065947	mt-Nd4l	mitochondrially encoded NADH dehydrogenase 4L [Source:MGI Symbol;Acc:MGI:102497]	297	70.0432835820895	70.5444078947368	72.8502202643171	72.8546365914787	74.1224862888482	670	608	681	399	547
ENSMUST00000082411.1	ENSMUSG00000064360	mt-Nd3	mitochondrially encoded NADH dehydrogenase 3 [Source:MGI Symbol;Acc:MGI:102499]	348	66.0907443700772	66.225818129163	68.0975544208546	66.9396963901506	68.3232350193514	27043	27624	26047	16732	22479
ENSMUST00000082409.1	ENSMUSG00000064358	mt-Co3	mitochondrially encoded cytochrome c oxidase III [Source:MGI Symbol;Acc:MGI:102502]	784	80.0596855848654	80.8294816633493	82.9635989349637	81.5511425566497	82.9390750965947	82566	83903	81124	52295	74797
ENSMUST00000082408.1	ENSMUSG00000064357	mt-Atp6	mitochondrially encoded ATP synthase 6 [Source:MGI Symbol;Acc:MGI:99927]	681	74.8451657846815	75.7309943655458	78.1999124069323	76.6378205763928	78.4080350050863	81823	82173	79915	50417	71761
ENSMUST00000082407.1	ENSMUSG00000064356	mt-Atp8	mitochondrially encoded ATP synthase 8 [Source:MGI Symbol;Acc:MGI:99926]	204	72.3934659090909	71.068376068376	73.9485714285714	70.3361581920904	72.2154811715481	704	585	700	354	478
ENSMUST00000082405.1	ENSMUSG00000064354	mt-Co2	mitochondrially encoded cytochrome c oxidase II [Source:MGI Symbol;Acc:MGI:102503]	684	64.4909986734887	65.0673436331921	66.516505024219	65.6504893825989	66.6460734870317	94986	96312	91457	59054	83280
ENSMUST00000082402.1	ENSMUSG00000064351	mt-Co1	mitochondrially encoded cytochrome c oxidase I [Source:MGI Symbol;Acc:MGI:102504]	1545	74.8404644240217	75.3007176084526	77.4038417854506	76.0426493126243	77.2429342130797	138408	138655	140872	87434	128825
ENSMUST00000082396.1	ENSMUSG00000064345	mt-Nd2	mitochondrially encoded NADH dehydrogenase 2 [Source:MGI Symbol;Acc:MGI:102500]	1038	68.3437940209735	68.6151207062466	69.8777301747311	69.0475317533062	70.0895694885871	25556	23901	23808	15274	20766
ENSMUST00000082392.1	ENSMUSG00000064341	mt-Nd1	mitochondrially encoded NADH dehydrogenase 1 [Source:MGI Symbol;Acc:MGI:101787]	957	63.9529738046074	64.7137313553498	66.3988407458015	64.6723115422851	66.0950634342419	49398	49478	45374	29171	39805
ENSMUST00000178942.1	ENSMUSG00000096607	7530416G11Rik	RIKEN cDNA 7530416G11 gene [Source:MGI Symbol;Acc:MGI:3036279]	1161	NA	NA	NA	NA	NA	0	0	0	0	0
ENSMUST00000107076.9	ENSMUSG00000028101	Pias3	protein inhibitor of activated STAT 3 [Source:MGI Symbol;Acc:MGI:1913126]	2858	194.125	146.35294117647	171.285714285714	169	187.9	8	17	7	7	10
ENSMUST00000162934.7	ENSMUSG00000028101	Pias3	protein inhibitor of activated STAT 3 [Source:MGI Symbol;Acc:MGI:1913126]	2281	NA	NA	NA	NA	NA	0	0	0	0	0
ENSMUST00000162778.2	ENSMUSG00000028101	Pias3	protein inhibitor of activated STAT 3 [Source:MGI Symbol;Acc:MGI:1913126]	439	NA	NA	NA	NA	NA	0	0	0	0	0
ENSMUST00000064900.15	ENSMUSG00000028101	Pias3	protein inhibitor of activated STAT 3 [Source:MGI Symbol;Acc:MGI:1913126]	2931	160.84375	194.190476190476	149.304347826086	159.083333333333	144.16	32	42	23	24	25
ENSMUST00000107077.3	ENSMUSG00000028101	Pias3	protein inhibitor of activated STAT 3 [Source:MGI Symbol;Acc:MGI:1913126]	2695	156.222222222222	158.7	188.166666666666	138.375	141.125	18	10	6	8	8
ENSMUST00000176288.1	ENSMUSG00000028101	Pias3	protein inhibitor of activated STAT 3 [Source:MGI Symbol;Acc:MGI:1913126]	627	NA	NA	NA	NA	NA	0	0	0	0	0
ENSMUST00000176302.7	ENSMUSG00000028101	Pias3	protein inhibitor of activated STAT 3 [Source:MGI Symbol;Acc:MGI:1913126]	744	NA	NA	NA	NA	NA	0	0	0	0	0
ENSMUST00000162707.8	ENSMUSG00000028101	Pias3	protein inhibitor of activated STAT 3 [Source:MGI Symbol;Acc:MGI:1913126]	795	NA	NA	NA	NA	NA	0	0	0	0	0
ENSMUST00000161296.1	ENSMUSG00000028101	Pias3	protein inhibitor of activated STAT 3 [Source:MGI Symbol;Acc:MGI:1913126]	770	NA	NA	NA	NA	NA	0	0	0	0	0
ENSMUST00000162156.2	ENSMUSG00000028101	Pias3	protein inhibitor of activated STAT 3 [Source:MGI Symbol;Acc:MGI:1913126]	812	NA	NA	NA	NA	NA	0	0	0	0	0
ENSMUST00000226740.1	ENSMUSG00000042354	Gnl3	guanine nucleotide binding protein-like 3 (nucleolar) [Source:MGI Symbol;Acc:MGI:1353651]	1765	203.857142857142	180.384615384615	215.818181818181	210.76923076923	153.625	14	13	11	13	16
ENSMUST00000037739.7	ENSMUSG00000042354	Gnl3	guanine nucleotide binding protein-like 3 (nucleolar) [Source:MGI Symbol;Acc:MGI:1353651]	1947	154.341463414634	179.097560975609	174.723404255319	184.178571428571	170.53488372093	41	41	47	28	43
ENSMUST00000227869.1	ENSMUSG00000042354	Gnl3	guanine nucleotide binding protein-like 3 (nucleolar) [Source:MGI Symbol;Acc:MGI:1353651]	1033	273.4	242.625	342	210	284.6	5	8	2	2	5
ENSMUST00000228713.1	ENSMUSG00000042354	Gnl3	guanine nucleotide binding protein-like 3 (nucleolar) [Source:MGI Symbol;Acc:MGI:1353651]	718	233	72	260	345	156	2	1	1	1	2
ENSMUST00000226379.1	ENSMUSG00000042354	Gnl3	guanine nucleotide binding protein-like 3 (nucleolar) [Source:MGI Symbol;Acc:MGI:1353651]	597	NA	232	169	NA	154.5	0	1	2	0	2
ENSMUST00000226220.1	ENSMUSG00000042354	Gnl3	guanine nucleotide binding protein-like 3 (nucleolar) [Source:MGI Symbol;Acc:MGI:1353651]	508	NA	NA	NA	NA	NA	0	0	0	0	0
ENSMUST00000228427.1	ENSMUSG00000042354	Gnl3	guanine nucleotide binding protein-like 3 (nucleolar) [Source:MGI Symbol;Acc:MGI:1353651]	1360	NA	NA	NA	NA	NA	0	0	0	0	0
ENSMUST00000228739.1	ENSMUSG00000042354	Gnl3	guanine nucleotide binding protein-like 3 (nucleolar) [Source:MGI Symbol;Acc:MGI:1353651]	693	NA	NA	NA	NA	NA	0	0	0	0	0
ENSMUST00000227389.1	ENSMUSG00000042354	Gnl3	guanine nucleotide binding protein-like 3 (nucleolar) [Source:MGI Symbol;Acc:MGI:1353651]	1656	NA	NA	NA	NA	NA	0	0	0	0	0
ENSMUST00000228774.1	ENSMUSG00000042354	Gnl3	guanine nucleotide binding protein-like 3 (nucleolar) [Source:MGI Symbol;Acc:MGI:1353651]	2264	NA	NA	NA	NA	NA	0	0	0	0	0
ENSMUST00000228341.1	ENSMUSG00000042354	Gnl3	guanine nucleotide binding protein-like 3 (nucleolar) [Source:MGI Symbol;Acc:MGI:1353651]	516	NA	NA	NA	NA	NA	0	0	0	0	0
ENSMUST00000227087.1	ENSMUSG00000042354	Gnl3	guanine nucleotide binding protein-like 3 (nucleolar) [Source:MGI Symbol;Acc:MGI:1353651]	466	NA	NA	NA	NA	NA	0	0	0	0	0
ENSMUST00000227467.1	ENSMUSG00000042354	Gnl3	guanine nucleotide binding protein-like 3 (nucleolar) [Source:MGI Symbol;Acc:MGI:1353651]	494	NA	NA	NA	NA	NA	0	0	0	0	0
ENSMUST00000227170.1	ENSMUSG00000042354	Gnl3	guanine nucleotide binding protein-like 3 (nucleolar) [Source:MGI Symbol;Acc:MGI:1353651]	666	NA	NA	NA	NA	NA	0	0	0	0	0
ENSMUST00000160684.7	ENSMUSG00000004446	Bid	BH3 interacting domain death agonist [Source:MGI Symbol;Acc:MGI:108093]	2415	NA	NA	NA	NA	NA	0	0	0	0	0
ENSMUST00000004560.11	ENSMUSG00000004446	Bid	BH3 interacting domain death agonist [Source:MGI Symbol;Acc:MGI:108093]	2189	161.085714285714	162.258064516129	161.064516129032	196.75	193.166666666666	35	31	31	24	36
ENSMUST00000161594.1	ENSMUSG00000004446	Bid	BH3 interacting domain death agonist [Source:MGI Symbol;Acc:MGI:108093]	563	NA	NA	NA	NA	NA	0	0	0	0	0
ENSMUST00000145948.1	ENSMUSG00000004446	Bid	BH3 interacting domain death agonist [Source:MGI Symbol;Acc:MGI:108093]	535	NA	NA	NA	NA	NA	0	0	0	0	0
ENSMUST00000125915.1	ENSMUSG00000004446	Bid	BH3 interacting domain death agonist [Source:MGI Symbol;Acc:MGI:108093]	458	NA	NA	NA	NA	NA	0	0	0	0	0
ENSMUST00000028858.7	ENSMUSG00000027379	Bub1	BUB1, mitotic checkpoint serine/threonine kinase [Source:MGI Symbol;Acc:MGI:1100510]	3421	244	NA	NA	NA	75	1	0	0	0	2
ENSMUST00000133943.1	ENSMUSG00000027379	Bub1	BUB1, mitotic checkpoint serine/threonine kinase [Source:MGI Symbol;Acc:MGI:1100510]	1137	NA	NA	NA	NA	NA	0	0	0	0	0
ENSMUST00000143824.1	ENSMUSG00000027379	Bub1	BUB1, mitotic checkpoint serine/threonine kinase [Source:MGI Symbol;Acc:MGI:1100510]	609	NA	NA	NA	NA	NA	0	0	0	0	0
ENSMUST00000153048.7	ENSMUSG00000027379	Bub1	BUB1, mitotic checkpoint serine/threonine kinase [Source:MGI Symbol;Acc:MGI:1100510]	438	NA	NA	NA	NA	NA	0	0	0	0	0
ENSMUST00000138624.1	ENSMUSG00000027379	Bub1	BUB1, mitotic checkpoint serine/threonine kinase [Source:MGI Symbol;Acc:MGI:1100510]	586	NA	NA	NA	NA	NA	0	0	0	0	0
ENSMUST00000045607.11	ENSMUSG00000035683	Melk	maternal embryonic leucine zipper kinase [Source:MGI Symbol;Acc:MGI:106924]	2955	174.8	192.833333333333	104.666666666666	171	140.333333333333	5	6	3	2	3
ENSMUST00000137703.7	ENSMUSG00000035683	Melk	maternal embryonic leucine zipper kinase [Source:MGI Symbol;Acc:MGI:106924]	696	NA	NA	NA	NA	NA	0	0	0	0	0
ENSMUST00000125708.1	ENSMUSG00000035683	Melk	maternal embryonic leucine zipper kinase [Source:MGI Symbol;Acc:MGI:106924]	442	NA	NA	NA	NA	NA	0	0	0	0	0
ENSMUST00000137759.1	ENSMUSG00000035683	Melk	maternal embryonic leucine zipper kinase [Source:MGI Symbol;Acc:MGI:106924]	648	NA	NA	NA	NA	NA	0	0	0	0	0
ENSMUST00000025204.6	ENSMUSG00000024346	Pfdn1	prefoldin 1 [Source:MGI Symbol;Acc:MGI:1914449]	1109	124.871287128712	114.046594982078	114.003610108303	114.348314606741	114.872659176029	202	279	277	178	267
ENSMUST00000237792.1	ENSMUSG00000024346	Pfdn1	prefoldin 1 [Source:MGI Symbol;Acc:MGI:1914449]	1024	82.25	96.6315789473684	104.260869565217	83.8823529411764	87.625	12	19	23	17	8
ENSMUST00000237499.1	ENSMUSG00000024346	Pfdn1	prefoldin 1 [Source:MGI Symbol;Acc:MGI:1914449]	485	NA	NA	NA	NA	NA	0	0	0	0	0
ENSMUST00000026425.12	ENSMUSG00000025364	Pa2g4	proliferation-associated 2G4 [Source:MGI Symbol;Acc:MGI:894684]	2432	146.40366972477	145.310606060606	150.704918032786	136.638888888888	138.116071428571	109	132	122	72	112
ENSMUST00000131728.3	ENSMUSG00000025364	Pa2g4	proliferation-associated 2G4 [Source:MGI Symbol;Acc:MGI:894684]	2483	136.389312977099	123.819444444444	134.316176470588	132.738636363636	138.558139534883	131	144	136	88	129
ENSMUST00000147068.1	ENSMUSG00000025364	Pa2g4	proliferation-associated 2G4 [Source:MGI Symbol;Acc:MGI:894684]	684	NA	NA	NA	NA	NA	0	0	0	0	0
ENSMUST00000015581.5	ENSMUSG00000015437	Gzmb	granzyme B [Source:MGI Symbol;Acc:MGI:109267]	1436	NA	142	NA	NA	NA	0	1	0	0	0
ENSMUST00000081582.7	ENSMUSG00000098905	Zfp953	zinc finger protein 953 [Source:MGI Symbol;Acc:MGI:3612873]	4677	217.666666666666	77	148	92	83	3	1	2	2	2
ENSMUST00000203584.2	ENSMUSG00000009112	Bcl2l13	BCL2-like 13 (apoptosis facilitator) [Source:MGI Symbol;Acc:MGI:2136959]	349	NA	NA	NA	NA	NA	0	0	0	0	0
ENSMUST00000204004.1	ENSMUSG00000009112	Bcl2l13	BCL2-like 13 (apoptosis facilitator) [Source:MGI Symbol;Acc:MGI:2136959]	2710	NA	NA	NA	NA	NA	0	0	0	0	0
ENSMUST00000203037.2	ENSMUSG00000009112	Bcl2l13	BCL2-like 13 (apoptosis facilitator) [Source:MGI Symbol;Acc:MGI:2136959]	408	NA	NA	NA	NA	NA	0	0	0	0	0
ENSMUST00000009256.3	ENSMUSG00000009112	Bcl2l13	BCL2-like 13 (apoptosis facilitator) [Source:MGI Symbol;Acc:MGI:2136959]	6925	133.051282051282	136.379629629629	142.367088607594	142.220588235294	135.268817204301	117	108	79	68	93
ENSMUST00000042857.13	ENSMUSG00000038331	Satb2	special AT-rich sequence binding protein 2 [Source:MGI Symbol;Acc:MGI:2679336]	6277	185.754385964912	185.351851851851	181.1	170.117647058823	159.949152542372	57	54	50	51	59
ENSMUST00000114415.9	ENSMUSG00000038331	Satb2	special AT-rich sequence binding protein 2 [Source:MGI Symbol;Acc:MGI:2679336]	5805	172.090909090909	173.6	168.285714285714	159.421052631578	151.09375	22	25	35	19	32
ENSMUST00000177424.1	ENSMUSG00000038331	Satb2	special AT-rich sequence binding protein 2 [Source:MGI Symbol;Acc:MGI:2679336]	4694	160.2	189.545454545454	202.5	155	168.857142857142	10	11	10	6	7
ENSMUST00000176759.1	ENSMUSG00000038331	Satb2	special AT-rich sequence binding protein 2 [Source:MGI Symbol;Acc:MGI:2679336]	331	NA	NA	NA	NA	NA	0	0	0	0	0
ENSMUST00000177282.1	ENSMUSG00000038331	Satb2	special AT-rich sequence binding protein 2 [Source:MGI Symbol;Acc:MGI:2679336]	454	117	NA	NA	NA	NA	1	0	0	0	0
ENSMUST00000227232.1	ENSMUSG00000046130	Vmn1r184	vomeronasal 1 receptor, 184 [Source:MGI Symbol;Acc:MGI:3852451]	8472	NA	NA	NA	NA	NA	0	0	0	0	0
ENSMUST00000228145.1	ENSMUSG00000046130	Vmn1r184	vomeronasal 1 receptor, 184 [Source:MGI Symbol;Acc:MGI:3852451]	5888	NA	NA	NA	NA	NA	0	0	0	0	0
ENSMUST00000228369.1	ENSMUSG00000046130	Vmn1r184	vomeronasal 1 receptor, 184 [Source:MGI Symbol;Acc:MGI:3852451]	6361	NA	NA	NA	NA	NA	0	0	0	0	0
ENSMUST00000227790.1	ENSMUSG00000046130	Vmn1r184	vomeronasal 1 receptor, 184 [Source:MGI Symbol;Acc:MGI:3852451]	4334	NA	NA	NA	NA	NA	0	0	0	0	0
ENSMUST00000227534.1	ENSMUSG00000046130	Vmn1r184	vomeronasal 1 receptor, 184 [Source:MGI Symbol;Acc:MGI:3852451]	4807	NA	NA	NA	NA	NA	0	0	0	0	0
ENSMUST00000227230.1	ENSMUSG00000046130	Vmn1r184	vomeronasal 1 receptor, 184 [Source:MGI Symbol;Acc:MGI:3852451]	7999	NA	NA	NA	NA	NA	0	0	0	0	0
ENSMUST00000057123.6	ENSMUSG00000046130	Vmn1r184	vomeronasal 1 receptor, 184 [Source:MGI Symbol;Acc:MGI:3852451]	945	NA	NA	NA	NA	NA	0	0	0	0	0
ENSMUST00000030180.6	ENSMUSG00000028460	Sit1	suppression inducing transmembrane adaptor 1 [Source:MGI Symbol;Acc:MGI:1889342]	1228	NA	NA	55	NA	NA	0	0	1	0	0
ENSMUST00000123526.1	ENSMUSG00000028460	Sit1	suppression inducing transmembrane adaptor 1 [Source:MGI Symbol;Acc:MGI:1889342]	820	NA	NA	NA	NA	NA	0	0	0	0	0
ENSMUST00000167314.2	ENSMUSG00000091805	Vmn2r108	vomeronasal 2, receptor 108 [Source:MGI Symbol;Acc:MGI:3643822]	8709	NA	NA	343	NA	NA	0	0	1	0	0
ENSMUST00000232850.1	ENSMUSG00000091805	Vmn2r108	vomeronasal 2, receptor 108 [Source:MGI Symbol;Acc:MGI:3643822]	8601	NA	NA	NA	76	NA	0	0	0	1	0
ENSMUST00000233382.1	ENSMUSG00000091805	Vmn2r108	vomeronasal 2, receptor 108 [Source:MGI Symbol;Acc:MGI:3643822]	8493	NA	293	NA	179	NA	0	1	0	1	0
ENSMUST00000233572.1	ENSMUSG00000091805	Vmn2r108	vomeronasal 2, receptor 108 [Source:MGI Symbol;Acc:MGI:3643822]	8585	NA	NA	157	NA	NA	0	0	1	0	0
ENSMUST00000233830.1	ENSMUSG00000091805	Vmn2r108	vomeronasal 2, receptor 108 [Source:MGI Symbol;Acc:MGI:3643822]	8477	185	NA	NA	NA	NA	2	0	0	0	0
ENSMUST00000232949.1	ENSMUSG00000091805	Vmn2r108	vomeronasal 2, receptor 108 [Source:MGI Symbol;Acc:MGI:3643822]	8378	347	NA	NA	NA	64	2	0	0	0	1
ENSMUST00000233143.1	ENSMUSG00000091805	Vmn2r108	vomeronasal 2, receptor 108 [Source:MGI Symbol;Acc:MGI:3643822]	8270	NA	245.5	NA	NA	95	0	2	0	0	1
ENSMUST00000233388.1	ENSMUSG00000091805	Vmn2r108	vomeronasal 2, receptor 108 [Source:MGI Symbol;Acc:MGI:3643822]	8162	47	NA	103	NA	NA	1	0	1	0	0
ENSMUST00000213415.1	ENSMUSG00000060918	Olfr51	olfactory receptor 51 [Source:MGI Symbol;Acc:MGI:1333747]	2819	NA	NA	NA	NA	NA	0	0	0	0	0
ENSMUST00000076514.1	ENSMUSG00000060918	Olfr51	olfactory receptor 51 [Source:MGI Symbol;Acc:MGI:1333747]	924	NA	NA	NA	NA	NA	0	0	0	0	0
ENSMUST00000211117.1	ENSMUSG00000019139	Isyna1	myo-inositol 1-phosphate synthase A1 [Source:MGI Symbol;Acc:MGI:1919030]	358	116	NA	NA	NA	42	1	0	0	0	1
ENSMUST00000210358.1	ENSMUSG00000019139	Isyna1	myo-inositol 1-phosphate synthase A1 [Source:MGI Symbol;Acc:MGI:1919030]	621	NA	NA	243	194	55.3333333333333	0	0	1	1	3
ENSMUST00000209285.1	ENSMUSG00000019139	Isyna1	myo-inositol 1-phosphate synthase A1 [Source:MGI Symbol;Acc:MGI:1919030]	1553	NA	NA	43	NA	NA	0	0	1	0	0
ENSMUST00000210005.1	ENSMUSG00000019139	Isyna1	myo-inositol 1-phosphate synthase A1 [Source:MGI Symbol;Acc:MGI:1919030]	1914	140.408163265306	142.970588235294	140.333333333333	122.55	115.444444444444	49	34	36	20	18
ENSMUST00000210878.1	ENSMUSG00000019139	Isyna1	myo-inositol 1-phosphate synthase A1 [Source:MGI Symbol;Acc:MGI:1919030]	1916	256.35	232.736842105263	248.95	271.333333333333	274	20	19	20	9	20
ENSMUST00000211501.1	ENSMUSG00000019139	Isyna1	myo-inositol 1-phosphate synthase A1 [Source:MGI Symbol;Acc:MGI:1919030]	237	NA	NA	NA	NA	NA	0	0	0	0	0
ENSMUST00000209751.1	ENSMUSG00000019139	Isyna1	myo-inositol 1-phosphate synthase A1 [Source:MGI Symbol;Acc:MGI:1919030]	561	NA	NA	NA	NA	NA	0	0	0	0	0
ENSMUST00000211773.1	ENSMUSG00000019139	Isyna1	myo-inositol 1-phosphate synthase A1 [Source:MGI Symbol;Acc:MGI:1919030]	719	NA	NA	NA	NA	NA	0	0	0	0	0
ENSMUST00000019283.9	ENSMUSG00000019139	Isyna1	myo-inositol 1-phosphate synthase A1 [Source:MGI Symbol;Acc:MGI:1919030]	1836	136.31506849315	135.382352941176	150.354838709677	150.26923076923	146.833333333333	73	68	62	52	78
ENSMUST00000215409.1	ENSMUSG00000059397	Olfr54	olfactory receptor 54 [Source:MGI Symbol;Acc:MGI:1333750]	4782	NA	NA	NA	NA	NA	0	0	0	0	0
ENSMUST00000217480.1	ENSMUSG00000059397	Olfr54	olfactory receptor 54 [Source:MGI Symbol;Acc:MGI:1333750]	5048	NA	NA	NA	NA	NA	0	0	0	0	0
ENSMUST00000072152.1	ENSMUSG00000059397	Olfr54	olfactory receptor 54 [Source:MGI Symbol;Acc:MGI:1333750]	942	NA	NA	NA	NA	NA	0	0	0	0	0
ENSMUST00000111908.2	ENSMUSG00000041445	Mmrn2	multimerin 2 [Source:MGI Symbol;Acc:MGI:2385618]	3974	112.65	123.083333333333	111	125	109.333333333333	20	12	12	3	9
ENSMUST00000227130.1	ENSMUSG00000041445	Mmrn2	multimerin 2 [Source:MGI Symbol;Acc:MGI:2385618]	519	NA	NA	NA	NA	NA	0	0	0	0	0
ENSMUST00000238198.1	ENSMUSG00000026614	Slc30a10	solute carrier family 30, member 10 [Source:MGI Symbol;Acc:MGI:2685058]	3506	168.714285714285	169.5	143.6	154.5	205	7	8	5	2	5
ENSMUST00000061093.6	ENSMUSG00000026614	Slc30a10	solute carrier family 30, member 10 [Source:MGI Symbol;Acc:MGI:2685058]	5836	203	160.869565217391	133	114.727272727272	156.65	17	23	22	11	20
ENSMUST00000238677.1	ENSMUSG00000026614	Slc30a10	solute carrier family 30, member 10 [Source:MGI Symbol;Acc:MGI:2685058]	5684	171.857142857142	175.75	170.785714285714	142.6	179.5	7	20	14	5	8
ENSMUST00000025830.8	ENSMUSG00000024897	Apba1	amyloid beta (A4) precursor protein binding, family A, member 1 [Source:MGI Symbol;Acc:MGI:1860297]	6620	156.558441558441	162.477611940298	147.847290640394	155.513157894736	150.184357541899	231	268	203	152	179
ENSMUST00000237688.1	ENSMUSG00000024897	Apba1	amyloid beta (A4) precursor protein binding, family A, member 1 [Source:MGI Symbol;Acc:MGI:1860297]	3174	NA	NA	58.25	NA	NA	0	0	4	0	0
ENSMUST00000097964.2	ENSMUSG00000073794	I0C0044D17Rik	RIKEN cDNA I0C0044D17 gene [Source:MGI Symbol;Acc:MGI:3588230]	2264	NA	NA	NA	NA	NA	0	0	0	0	0
ENSMUST00000168045.1	ENSMUSG00000073794	I0C0044D17Rik	RIKEN cDNA I0C0044D17 gene [Source:MGI Symbol;Acc:MGI:3588230]	510	NA	NA	NA	NA	NA	0	0	0	0	0
ENSMUST00000137496.9	ENSMUSG00000048280	Zfp738	zinc finger protein 738 [Source:MGI Symbol;Acc:MGI:3040706]	13215	174.1	158.653846153846	174.888888888888	154	156.51724137931	20	26	18	14	29
ENSMUST00000220552.2	ENSMUSG00000048280	Zfp738	zinc finger protein 738 [Source:MGI Symbol;Acc:MGI:3040706]	2331	NA	NA	190	NA	NA	0	0	1	0	0
ENSMUST00000175821.7	ENSMUSG00000048280	Zfp738	zinc finger protein 738 [Source:MGI Symbol;Acc:MGI:3040706]	652	NA	NA	NA	NA	NA	0	0	0	0	0
ENSMUST00000110973.2	ENSMUSG00000048280	Zfp738	zinc finger protein 738 [Source:MGI Symbol;Acc:MGI:3040706]	683	NA	NA	NA	NA	NA	0	0	0	0	0
ENSMUST00000125495.9	ENSMUSG00000048280	Zfp738	zinc finger protein 738 [Source:MGI Symbol;Acc:MGI:3040706]	712	100	62	NA	NA	98.5	1	1	0	0	4
ENSMUST00000175678.1	ENSMUSG00000048280	Zfp738	zinc finger protein 738 [Source:MGI Symbol;Acc:MGI:3040706]	609	NA	NA	40	NA	102.5	0	0	1	0	4
ENSMUST00000223721.1	ENSMUSG00000048280	Zfp738	zinc finger protein 738 [Source:MGI Symbol;Acc:MGI:3040706]	1253	NA	NA	NA	NA	NA	0	0	0	0	0
ENSMUST00000143073.7	ENSMUSG00000028461	Ccdc107	coiled-coil domain containing 107 [Source:MGI Symbol;Acc:MGI:1913423]	594	NA	NA	NA	NA	NA	0	0	0	0	0
ENSMUST00000030181.11	ENSMUSG00000028461	Ccdc107	coiled-coil domain containing 107 [Source:MGI Symbol;Acc:MGI:1913423]	817	98.1098901098901	100.342105263157	108.978021978021	104.121212121212	104.815533980582	91	114	91	66	103
ENSMUST00000127324.1	ENSMUSG00000028461	Ccdc107	coiled-coil domain containing 107 [Source:MGI Symbol;Acc:MGI:1913423]	363	NA	NA	NA	NA	NA	0	0	0	0	0
ENSMUST00000107922.2	ENSMUSG00000028461	Ccdc107	coiled-coil domain containing 107 [Source:MGI Symbol;Acc:MGI:1913423]	865	292.8	288.75	274.166666666666	231.333333333333	219.25	5	4	6	6	4
ENSMUST00000140005.7	ENSMUSG00000028461	Ccdc107	coiled-coil domain containing 107 [Source:MGI Symbol;Acc:MGI:1913423]	942	NA	NA	NA	NA	NA	0	0	0	0	0
ENSMUST00000137113.1	ENSMUSG00000028461	Ccdc107	coiled-coil domain containing 107 [Source:MGI Symbol;Acc:MGI:1913423]	863	NA	NA	NA	NA	190.5	0	0	0	0	2
ENSMUST00000233982.1	ENSMUSG00000043537	Vmn1r225	vomeronasal 1 receptor 225 [Source:MGI Symbol;Acc:MGI:2159626]	3986	NA	NA	NA	NA	NA	0	0	0	0	0
ENSMUST00000233346.1	ENSMUSG00000043537	Vmn1r225	vomeronasal 1 receptor 225 [Source:MGI Symbol;Acc:MGI:2159626]	3781	NA	NA	NA	NA	NA	0	0	0	0	0
ENSMUST00000061660.1	ENSMUSG00000043537	Vmn1r225	vomeronasal 1 receptor 225 [Source:MGI Symbol;Acc:MGI:2159626]	897	NA	NA	NA	NA	NA	0	0	0	0	0
ENSMUST00000170057.7	ENSMUSG00000094105	Gm8922	predicted gene 8922 [Source:MGI Symbol;Acc:MGI:3779821]	1167	NA	NA	NA	NA	NA	0	0	0	0	0
ENSMUST00000178989.1	ENSMUSG00000094105	Gm8922	predicted gene 8922 [Source:MGI Symbol;Acc:MGI:3779821]	465	NA	NA	NA	NA	NA	0	0	0	0	0
ENSMUST00000017920.13	ENSMUSG00000017776	Crk	v-crk avian sarcoma virus CT10 oncogene homolog [Source:MGI Symbol;Acc:MGI:88508]	3642	155.84	157.867256637168	155.282051282051	148.933333333333	160.871794871794	75	113	78	60	78
ENSMUST00000108426.7	ENSMUSG00000017776	Crk	v-crk avian sarcoma virus CT10 oncogene homolog [Source:MGI Symbol;Acc:MGI:88508]	671	NA	NA	NA	NA	NA	0	0	0	0	0
ENSMUST00000108425.7	ENSMUSG00000017776	Crk	v-crk avian sarcoma virus CT10 oncogene homolog [Source:MGI Symbol;Acc:MGI:88508]	4290	149.34962406015	152.281632653061	154.8125	145.102702702702	152.75652173913	266	245	256	185	230
ENSMUST00000093115.3	ENSMUSG00000017776	Crk	v-crk avian sarcoma virus CT10 oncogene homolog [Source:MGI Symbol;Acc:MGI:88508]	965	105.666666666666	46	149.5	NA	45	3	1	2	0	1
ENSMUST00000147718.1	ENSMUSG00000017776	Crk	v-crk avian sarcoma virus CT10 oncogene homolog [Source:MGI Symbol;Acc:MGI:88508]	852	127	NA	NA	NA	NA	1	0	0	0	0
ENSMUST00000077667.3	ENSMUSG00000062061	Obp2a	odorant binding protein 2A [Source:MGI Symbol;Acc:MGI:2387617]	744	NA	NA	NA	NA	NA	0	0	0	0	0
ENSMUST00000165123.7	ENSMUSG00000024576	Csnk1a1	casein kinase 1, alpha 1 [Source:MGI Symbol;Acc:MGI:1934950]	4083	144.837988826815	149.555858310626	145.533333333333	151.586046511627	154.264615384615	358	367	315	215	325
ENSMUST00000165721.7	ENSMUSG00000024576	Csnk1a1	casein kinase 1, alpha 1 [Source:MGI Symbol;Acc:MGI:1934950]	2323	154.087248322147	157.606299212598	154.483333333333	153.791666666666	147.026143790849	149	127	120	72	153
ENSMUST00000115246.8	ENSMUSG00000024576	Csnk1a1	casein kinase 1, alpha 1 [Source:MGI Symbol;Acc:MGI:1934950]	1484	148	127.8	NA	53	50.5	2	5	0	1	2
ENSMUST00000166990.7	ENSMUSG00000024576	Csnk1a1	casein kinase 1, alpha 1 [Source:MGI Symbol;Acc:MGI:1934950]	1860	NA	175	11	NA	NA	0	1	1	0	0
ENSMUST00000163205.7	ENSMUSG00000024576	Csnk1a1	casein kinase 1, alpha 1 [Source:MGI Symbol;Acc:MGI:1934950]	3204	135.8	210.714285714285	239.333333333333	104	204.6	5	7	6	3	5
ENSMUST00000165381.1	ENSMUSG00000024576	Csnk1a1	casein kinase 1, alpha 1 [Source:MGI Symbol;Acc:MGI:1934950]	2275	146	NA	210	NA	NA	2	0	1	0	0
ENSMUST00000170862.7	ENSMUSG00000024576	Csnk1a1	casein kinase 1, alpha 1 [Source:MGI Symbol;Acc:MGI:1934950]	2259	149.192307692307	157.74074074074	148.108695652173	129.90625	160.268656716417	52	54	46	32	67
ENSMUST00000167187.7	ENSMUSG00000024576	Csnk1a1	casein kinase 1, alpha 1 [Source:MGI Symbol;Acc:MGI:1934950]	1222	NA	NA	NA	NA	NA	0	0	0	0	0
ENSMUST00000164253.1	ENSMUSG00000024576	Csnk1a1	casein kinase 1, alpha 1 [Source:MGI Symbol;Acc:MGI:1934950]	526	95	166	NA	NA	NA	2	1	0	0	0
ENSMUST00000170482.1	ENSMUSG00000024576	Csnk1a1	casein kinase 1, alpha 1 [Source:MGI Symbol;Acc:MGI:1934950]	2895	193.166666666666	219.666666666666	201.333333333333	200.5	181.666666666666	6	3	3	2	3
ENSMUST00000128511.7	ENSMUSG00000029310	Nudt9	nudix (nucleoside diphosphate linked moiety X)-type motif 9 [Source:MGI Symbol;Acc:MGI:1921417]	829	NA	NA	NA	NA	NA	0	0	0	0	0
ENSMUST00000150226.7	ENSMUSG00000029310	Nudt9	nudix (nucleoside diphosphate linked moiety X)-type motif 9 [Source:MGI Symbol;Acc:MGI:1921417]	995	NA	NA	NA	NA	156	0	0	0	0	1
ENSMUST00000031250.13	ENSMUSG00000029310	Nudt9	nudix (nucleoside diphosphate linked moiety X)-type motif 9 [Source:MGI Symbol;Acc:MGI:1921417]	1488	123.715328467153	118.937931034482	114.723880597014	109.865384615384	115.785276073619	137	145	134	104	163
ENSMUST00000142018.1	ENSMUSG00000029310	Nudt9	nudix (nucleoside diphosphate linked moiety X)-type motif 9 [Source:MGI Symbol;Acc:MGI:1921417]	932	NA	NA	NA	NA	NA	0	0	0	0	0
ENSMUST00000134313.7	ENSMUSG00000029310	Nudt9	nudix (nucleoside diphosphate linked moiety X)-type motif 9 [Source:MGI Symbol;Acc:MGI:1921417]	729	NA	NA	NA	148	NA	0	0	0	1	0
ENSMUST00000148261.1	ENSMUSG00000029310	Nudt9	nudix (nucleoside diphosphate linked moiety X)-type motif 9 [Source:MGI Symbol;Acc:MGI:1921417]	482	NA	NA	NA	NA	NA	0	0	0	0	0
ENSMUST00000167566.7	ENSMUSG00000094205	Gm8926	predicted gene 8926 [Source:MGI Symbol;Acc:MGI:3779823]	1098	NA	NA	NA	NA	NA	0	0	0	0	0
ENSMUST00000178158.1	ENSMUSG00000094205	Gm8926	predicted gene 8926 [Source:MGI Symbol;Acc:MGI:3779823]	465	NA	NA	NA	NA	NA	0	0	0	0	0
ENSMUST00000187549.6	ENSMUSG00000021103	Mnat1	menage a trois 1 [Source:MGI Symbol;Acc:MGI:106207]	3688	NA	121	NA	NA	NA	0	1	0	0	0
ENSMUST00000189644.6	ENSMUSG00000021103	Mnat1	menage a trois 1 [Source:MGI Symbol;Acc:MGI:106207]	1294	142.333333333333	192	165.333333333333	99	133.75	6	6	3	3	4
ENSMUST00000021523.6	ENSMUSG00000021103	Mnat1	menage a trois 1 [Source:MGI Symbol;Acc:MGI:106207]	2505	128.79365079365	146.265625	120.086206896551	127.076923076923	151.644444444444	63	64	58	39	45
ENSMUST00000025363.6	ENSMUSG00000024486	Hbegf	heparin-binding EGF-like growth factor [Source:MGI Symbol;Acc:MGI:96070]	2375	148.764705882352	135.486486486486	122.85294117647	129.75	127.261904761904	34	37	34	20	42
ENSMUST00000237621.1	ENSMUSG00000024486	Hbegf	heparin-binding EGF-like growth factor [Source:MGI Symbol;Acc:MGI:96070]	446	NA	NA	NA	NA	NA	0	0	0	0	0
ENSMUST00000236520.1	ENSMUSG00000024486	Hbegf	heparin-binding EGF-like growth factor [Source:MGI Symbol;Acc:MGI:96070]	2890	NA	NA	NA	NA	NA	0	0	0	0	0
ENSMUST00000056045.4	ENSMUSG00000047221	Fam185a	family with sequence similarity 185, member A [Source:MGI Symbol;Acc:MGI:2140983]	3027	172.522727272727	160.883720930232	154.535714285714	147.631578947368	170.272727272727	44	43	28	19	22
ENSMUST00000153301.1	ENSMUSG00000047221	Fam185a	family with sequence similarity 185, member A [Source:MGI Symbol;Acc:MGI:2140983]	1590	169	NA	NA	NA	NA	1	0	0	0	0
ENSMUST00000146056.1	ENSMUSG00000047221	Fam185a	family with sequence similarity 185, member A [Source:MGI Symbol;Acc:MGI:2140983]	941	NA	101	NA	NA	NA	0	1	0	0	0
ENSMUST00000168154.1	ENSMUSG00000094036	Gm6465	predicted gene 6465 [Source:MGI Symbol;Acc:MGI:3642949]	1098	NA	NA	NA	NA	NA	0	0	0	0	0
ENSMUST00000115320.7	ENSMUSG00000039841	Zfp800	zinc finger protein 800 [Source:MGI Symbol;Acc:MGI:1889334]	4311	159.25	187.5	121.8	149.5	172.5	12	14	10	12	12
ENSMUST00000035930.10	ENSMUSG00000039841	Zfp800	zinc finger protein 800 [Source:MGI Symbol;Acc:MGI:1889334]	3881	NA	183	NA	275	NA	0	2	0	1	0
ENSMUST00000115321.8	ENSMUSG00000039841	Zfp800	zinc finger protein 800 [Source:MGI Symbol;Acc:MGI:1889334]	2699	78	NA	NA	NA	NA	1	0	0	0	0
ENSMUST00000123098.7	ENSMUSG00000039841	Zfp800	zinc finger protein 800 [Source:MGI Symbol;Acc:MGI:1889334]	2084	NA	NA	127	NA	NA	0	0	1	0	0
ENSMUST00000155494.1	ENSMUSG00000039841	Zfp800	zinc finger protein 800 [Source:MGI Symbol;Acc:MGI:1889334]	703	NA	NA	NA	98	NA	0	0	0	1	0
ENSMUST00000033990.6	ENSMUSG00000031583	Wrn	Werner syndrome RecQ like helicase [Source:MGI Symbol;Acc:MGI:109635]	5019	NA	119	79	NA	NA	0	3	1	0	0
ENSMUST00000211498.1	ENSMUSG00000031583	Wrn	Werner syndrome RecQ like helicase [Source:MGI Symbol;Acc:MGI:109635]	4856	NA	NA	NA	NA	NA	0	0	0	0	0
ENSMUST00000209293.1	ENSMUSG00000031583	Wrn	Werner syndrome RecQ like helicase [Source:MGI Symbol;Acc:MGI:109635]	1921	NA	NA	NA	NA	NA	0	0	0	0	0
ENSMUST00000033991.12	ENSMUSG00000031583	Wrn	Werner syndrome RecQ like helicase [Source:MGI Symbol;Acc:MGI:109635]	6262	183.461538461538	252.076923076923	192.230769230769	191.75	189.333333333333	13	13	13	4	18
ENSMUST00000168329.6	ENSMUSG00000067848	4933402N22Rik	RIKEN cDNA 4933402N22 gene [Source:MGI Symbol;Acc:MGI:3703021]	1125	NA	NA	NA	NA	NA	0	0	0	0	0
ENSMUST00000170301.2	ENSMUSG00000067848	4933402N22Rik	RIKEN cDNA 4933402N22 gene [Source:MGI Symbol;Acc:MGI:3703021]	1092	NA	NA	NA	NA	NA	0	0	0	0	0
ENSMUST00000069292.13	ENSMUSG00000030145	Zfp248	zinc finger protein 248 [Source:MGI Symbol;Acc:MGI:1919970]	3683	150.032258064516	151.5625	126.125	173.615384615384	130.857142857142	31	32	32	13	21
ENSMUST00000161519.7	ENSMUSG00000030145	Zfp248	zinc finger protein 248 [Source:MGI Symbol;Acc:MGI:1919970]	2243	NA	NA	NA	NA	NA	0	0	0	0	0
ENSMUST00000162275.7	ENSMUSG00000030145	Zfp248	zinc finger protein 248 [Source:MGI Symbol;Acc:MGI:1919970]	457	NA	NA	NA	NA	NA	0	0	0	0	0
ENSMUST00000159403.1	ENSMUSG00000030145	Zfp248	zinc finger protein 248 [Source:MGI Symbol;Acc:MGI:1919970]	480	NA	NA	NA	NA	NA	0	0	0	0	0
ENSMUST00000189168.1	ENSMUSG00000030145	Zfp248	zinc finger protein 248 [Source:MGI Symbol;Acc:MGI:1919970]	1615	108.76923076923	132.066666666666	76.45	110	105.777777777777	13	15	20	9	9
ENSMUST00000161176.2	ENSMUSG00000030145	Zfp248	zinc finger protein 248 [Source:MGI Symbol;Acc:MGI:1919970]	1047	NA	NA	NA	NA	NA	0	0	0	0	0
ENSMUST00000159254.1	ENSMUSG00000030145	Zfp248	zinc finger protein 248 [Source:MGI Symbol;Acc:MGI:1919970]	616	NA	NA	NA	NA	NA	0	0	0	0	0
ENSMUST00000076635.12	ENSMUSG00000036916	Zfp280c	zinc finger protein 280C [Source:MGI Symbol;Acc:MGI:2387585]	4355	262.444444444444	322.2	290.75	332	228.142857142857	9	10	4	4	7
ENSMUST00000088898.10	ENSMUSG00000036916	Zfp280c	zinc finger protein 280C [Source:MGI Symbol;Acc:MGI:2387585]	4024	262.75	289.833333333333	259.25	197.285714285714	95.5	8	6	8	7	2
ENSMUST00000072292.11	ENSMUSG00000036916	Zfp280c	zinc finger protein 280C [Source:MGI Symbol;Acc:MGI:2387585]	4045	249	270.6	347.625	250.333333333333	276.923076923076	8	10	8	6	13
ENSMUST00000114940.8	ENSMUSG00000036916	Zfp280c	zinc finger protein 280C [Source:MGI Symbol;Acc:MGI:2387585]	3863	321.666666666666	204.75	226	185.333333333333	298	3	4	1	3	5
ENSMUST00000143028.1	ENSMUSG00000036916	Zfp280c	zinc finger protein 280C [Source:MGI Symbol;Acc:MGI:2387585]	832	NA	NA	NA	NA	NA	0	0	0	0	0
ENSMUST00000149058.7	ENSMUSG00000036916	Zfp280c	zinc finger protein 280C [Source:MGI Symbol;Acc:MGI:2387585]	363	NA	NA	NA	NA	NA	0	0	0	0	0
ENSMUST00000150501.1	ENSMUSG00000036916	Zfp280c	zinc finger protein 280C [Source:MGI Symbol;Acc:MGI:2387585]	842	NA	NA	NA	NA	NA	0	0	0	0	0
ENSMUST00000125965.7	ENSMUSG00000048652	Samd13	sterile alpha motif domain containing 13 [Source:MGI Symbol;Acc:MGI:2686498]	1590	228	NA	174.333333333333	NA	217	1	0	3	0	1
ENSMUST00000124931.7	ENSMUSG00000048652	Samd13	sterile alpha motif domain containing 13 [Source:MGI Symbol;Acc:MGI:2686498]	905	NA	NA	NA	NA	NA	0	0	0	0	0
ENSMUST00000147113.1	ENSMUSG00000048652	Samd13	sterile alpha motif domain containing 13 [Source:MGI Symbol;Acc:MGI:2686498]	729	NA	152	NA	NA	NA	0	1	0	0	0
ENSMUST00000197989.1	ENSMUSG00000048652	Samd13	sterile alpha motif domain containing 13 [Source:MGI Symbol;Acc:MGI:2686498]	591	NA	NA	NA	NA	NA	0	0	0	0	0
ENSMUST00000144837.1	ENSMUSG00000048652	Samd13	sterile alpha motif domain containing 13 [Source:MGI Symbol;Acc:MGI:2686498]	642	NA	NA	NA	127	NA	0	0	0	1	0
ENSMUST00000026504.12	ENSMUSG00000025436	Atp23	ATP23 metallopeptidase and ATP synthase assembly factor homolog [Source:MGI Symbol;Acc:MGI:1916984]	903	30	169	18	88.5	91	1	2	1	2	1
ENSMUST00000168520.2	ENSMUSG00000025436	Atp23	ATP23 metallopeptidase and ATP synthase assembly factor homolog [Source:MGI Symbol;Acc:MGI:1916984]	1043	132.307692307692	156.74074074074	144.764705882352	148.571428571428	99.4166666666666	26	27	17	14	12
ENSMUST00000220051.1	ENSMUSG00000025436	Atp23	ATP23 metallopeptidase and ATP synthase assembly factor homolog [Source:MGI Symbol;Acc:MGI:1916984]	3461	NA	150	NA	NA	NA	0	1	0	0	0
ENSMUST00000019701.8	ENSMUSG00000031383	Dusp9	dual specificity phosphatase 9 [Source:MGI Symbol;Acc:MGI:2387107]	2722	130.428571428571	104.285714285714	248	149	169.75	7	7	1	1	4
ENSMUST00000025137.8	ENSMUSG00000024287	Thoc1	THO complex 1 [Source:MGI Symbol;Acc:MGI:1919668]	4134	165.583333333333	176.469696969696	148.375	176.877551020408	162.645833333333	72	66	72	49	48
ENSMUST00000234423.1	ENSMUSG00000024287	Thoc1	THO complex 1 [Source:MGI Symbol;Acc:MGI:1919668]	680	NA	NA	NA	NA	NA	0	0	0	0	0
ENSMUST00000234890.1	ENSMUSG00000024287	Thoc1	THO complex 1 [Source:MGI Symbol;Acc:MGI:1919668]	891	NA	NA	NA	NA	NA	0	0	0	0	0
ENSMUST00000234805.1	ENSMUSG00000024287	Thoc1	THO complex 1 [Source:MGI Symbol;Acc:MGI:1919668]	2047	NA	NA	NA	NA	NA	0	0	0	0	0
ENSMUST00000234622.1	ENSMUSG00000024287	Thoc1	THO complex 1 [Source:MGI Symbol;Acc:MGI:1919668]	2303	NA	NA	NA	NA	NA	0	0	0	0	0
ENSMUST00000234324.1	ENSMUSG00000024287	Thoc1	THO complex 1 [Source:MGI Symbol;Acc:MGI:1919668]	2437	NA	NA	NA	NA	NA	0	0	0	0	0
ENSMUST00000234901.1	ENSMUSG00000024287	Thoc1	THO complex 1 [Source:MGI Symbol;Acc:MGI:1919668]	1875	273.863636363636	286.714285714285	290.2	242.714285714285	240.117647058823	22	14	10	7	17
ENSMUST00000234330.1	ENSMUSG00000024287	Thoc1	THO complex 1 [Source:MGI Symbol;Acc:MGI:1919668]	412	NA	NA	NA	NA	NA	0	0	0	0	0
ENSMUST00000234975.1	ENSMUSG00000024287	Thoc1	THO complex 1 [Source:MGI Symbol;Acc:MGI:1919668]	1158	NA	NA	NA	NA	NA	0	0	0	0	0
ENSMUST00000234600.1	ENSMUSG00000024287	Thoc1	THO complex 1 [Source:MGI Symbol;Acc:MGI:1919668]	547	NA	NA	NA	NA	NA	0	0	0	0	0
ENSMUST00000235035.1	ENSMUSG00000024287	Thoc1	THO complex 1 [Source:MGI Symbol;Acc:MGI:1919668]	1039	NA	NA	NA	NA	NA	0	0	0	0	0
ENSMUST00000234370.1	ENSMUSG00000024287	Thoc1	THO complex 1 [Source:MGI Symbol;Acc:MGI:1919668]	851	NA	NA	NA	NA	NA	0	0	0	0	0
ENSMUST00000234111.1	ENSMUSG00000024287	Thoc1	THO complex 1 [Source:MGI Symbol;Acc:MGI:1919668]	500	226	279.5	NA	NA	277	1	2	0	0	3
ENSMUST00000005067.5	ENSMUSG00000004937	Sgta	small glutamine-rich tetratricopeptide repeat (TPR)-containing, alpha [Source:MGI Symbol;Acc:MGI:1098703]	1969	119.462686567164	136.575	117.458563535911	133.009174311926	127.708333333333	134	160	181	109	168
ENSMUST00000218208.1	ENSMUSG00000004937	Sgta	small glutamine-rich tetratricopeptide repeat (TPR)-containing, alpha [Source:MGI Symbol;Acc:MGI:1098703]	1964	123.638095238095	134.817391304347	128.608695652173	120.71875	131.981818181818	105	115	115	96	110
ENSMUST00000219126.1	ENSMUSG00000004937	Sgta	small glutamine-rich tetratricopeptide repeat (TPR)-containing, alpha [Source:MGI Symbol;Acc:MGI:1098703]	698	NA	NA	NA	NA	NA	0	0	0	0	0
ENSMUST00000219297.1	ENSMUSG00000004937	Sgta	small glutamine-rich tetratricopeptide repeat (TPR)-containing, alpha [Source:MGI Symbol;Acc:MGI:1098703]	693	NA	NA	NA	NA	NA	0	0	0	0	0
ENSMUST00000219401.1	ENSMUSG00000004937	Sgta	small glutamine-rich tetratricopeptide repeat (TPR)-containing, alpha [Source:MGI Symbol;Acc:MGI:1098703]	869	NA	NA	NA	NA	NA	0	0	0	0	0
ENSMUST00000220317.1	ENSMUSG00000004937	Sgta	small glutamine-rich tetratricopeptide repeat (TPR)-containing, alpha [Source:MGI Symbol;Acc:MGI:1098703]	775	NA	NA	NA	NA	NA	0	0	0	0	0
ENSMUST00000220202.1	ENSMUSG00000004937	Sgta	small glutamine-rich tetratricopeptide repeat (TPR)-containing, alpha [Source:MGI Symbol;Acc:MGI:1098703]	642	NA	NA	NA	NA	NA	0	0	0	0	0
ENSMUST00000049703.5	ENSMUSG00000090202	4930503B20Rik	RIKEN cDNA 4930503B20 gene [Source:MGI Symbol;Acc:MGI:1922264]	2080	NA	136	NA	125	NA	0	1	0	1	0
ENSMUST00000126930.1	ENSMUSG00000090202	4930503B20Rik	RIKEN cDNA 4930503B20 gene [Source:MGI Symbol;Acc:MGI:1922264]	368	NA	NA	NA	NA	NA	0	0	0	0	0
ENSMUST00000149825.1	ENSMUSG00000090202	4930503B20Rik	RIKEN cDNA 4930503B20 gene [Source:MGI Symbol;Acc:MGI:1922264]	970	NA	NA	NA	NA	NA	0	0	0	0	0
ENSMUST00000139129.8	ENSMUSG00000018379	Srsf1	serine/arginine-rich splicing factor 1 [Source:MGI Symbol;Acc:MGI:98283]	5362	181.615384615384	175.045045045045	170.544554455445	172.6	179.926605504587	104	111	101	70	109
ENSMUST00000079866.10	ENSMUSG00000018379	Srsf1	serine/arginine-rich splicing factor 1 [Source:MGI Symbol;Acc:MGI:98283]	2948	232.3125	202.285714285714	190.7	162	236.666666666666	16	14	10	11	6
ENSMUST00000171976.1	ENSMUSG00000018379	Srsf1	serine/arginine-rich splicing factor 1 [Source:MGI Symbol;Acc:MGI:98283]	645	72	NA	NA	NA	NA	1	0	0	0	0
ENSMUST00000107920.9	ENSMUSG00000018379	Srsf1	serine/arginine-rich splicing factor 1 [Source:MGI Symbol;Acc:MGI:98283]	1209	NA	NA	NA	NA	NA	0	0	0	0	0
ENSMUST00000134824.8	ENSMUSG00000018379	Srsf1	serine/arginine-rich splicing factor 1 [Source:MGI Symbol;Acc:MGI:98283]	896	300.380952380952	227.2	204.555555555555	271.3	329.777777777777	21	20	9	10	18
ENSMUST00000172186.1	ENSMUSG00000018379	Srsf1	serine/arginine-rich splicing factor 1 [Source:MGI Symbol;Acc:MGI:98283]	401	NA	NA	NA	NA	NA	0	0	0	0	0
ENSMUST00000132983.2	ENSMUSG00000018379	Srsf1	serine/arginine-rich splicing factor 1 [Source:MGI Symbol;Acc:MGI:98283]	759	NA	NA	NA	NA	NA	0	0	0	0	0
ENSMUST00000040182.12	ENSMUSG00000032740	Ccdc88a	coiled coil domain containing 88A [Source:MGI Symbol;Acc:MGI:1925177]	9376	173.048780487804	184.4375	169.464788732394	184.152173913043	182.20652173913	82	80	71	46	92
ENSMUST00000123561.7	ENSMUSG00000032740	Ccdc88a	coiled coil domain containing 88A [Source:MGI Symbol;Acc:MGI:1925177]	2209	NA	NA	NA	NA	NA	0	0	0	0	0
ENSMUST00000155854.7	ENSMUSG00000032740	Ccdc88a	coiled coil domain containing 88A [Source:MGI Symbol;Acc:MGI:1925177]	1217	NA	NA	NA	NA	NA	0	0	0	0	0
ENSMUST00000140194.1	ENSMUSG00000032740	Ccdc88a	coiled coil domain containing 88A [Source:MGI Symbol;Acc:MGI:1925177]	1064	NA	69	NA	NA	NA	0	1	0	0	0
ENSMUST00000137227.1	ENSMUSG00000032740	Ccdc88a	coiled coil domain containing 88A [Source:MGI Symbol;Acc:MGI:1925177]	487	NA	NA	NA	NA	NA	0	0	0	0	0
ENSMUST00000144450.1	ENSMUSG00000032740	Ccdc88a	coiled coil domain containing 88A [Source:MGI Symbol;Acc:MGI:1925177]	682	165	141	NA	NA	108	2	1	0	0	1
ENSMUST00000109477.1	ENSMUSG00000032740	Ccdc88a	coiled coil domain containing 88A [Source:MGI Symbol;Acc:MGI:1925177]	1716	NA	NA	NA	NA	NA	0	0	0	0	0
ENSMUST00000032841.6	ENSMUSG00000030612	Mrpl46	mitochondrial ribosomal protein L46 [Source:MGI Symbol;Acc:MGI:1914558]	1134	104.627906976744	123.567375886524	105.775193798449	112.678571428571	121.809523809523	129	141	129	112	147
ENSMUST00000133949.1	ENSMUSG00000030612	Mrpl46	mitochondrial ribosomal protein L46 [Source:MGI Symbol;Acc:MGI:1914558]	768	NA	NA	NA	NA	NA	0	0	0	0	0
ENSMUST00000080065.2	ENSMUSG00000059316	Slc27a4	solute carrier family 27 (fatty acid transporter), member 4 [Source:MGI Symbol;Acc:MGI:1347347]	4054	125.564705882352	125.046357615894	121.03861003861	121.76	124.76862745098	255	302	259	175	255
ENSMUST00000136444.1	ENSMUSG00000059316	Slc27a4	solute carrier family 27 (fatty acid transporter), member 4 [Source:MGI Symbol;Acc:MGI:1347347]	722	NA	NA	NA	NA	NA	0	0	0	0	0
ENSMUST00000227435.1	ENSMUSG00000022607	Ptk2	PTK2 protein tyrosine kinase 2 [Source:MGI Symbol;Acc:MGI:95481]	4580	NA	NA	NA	NA	NA	0	0	0	0	0
ENSMUST00000226893.1	ENSMUSG00000022607	Ptk2	PTK2 protein tyrosine kinase 2 [Source:MGI Symbol;Acc:MGI:95481]	318	NA	NA	NA	NA	NA	0	0	0	0	0
ENSMUST00000228180.2	ENSMUSG00000022607	Ptk2	PTK2 protein tyrosine kinase 2 [Source:MGI Symbol;Acc:MGI:95481]	1333	156	183.666666666666	191	NA	NA	1	3	1	0	0
ENSMUST00000226466.1	ENSMUSG00000022607	Ptk2	PTK2 protein tyrosine kinase 2 [Source:MGI Symbol;Acc:MGI:95481]	488	NA	NA	NA	NA	NA	0	0	0	0	0
ENSMUST00000226848.1	ENSMUSG00000022607	Ptk2	PTK2 protein tyrosine kinase 2 [Source:MGI Symbol;Acc:MGI:95481]	364	NA	NA	NA	NA	NA	0	0	0	0	0
ENSMUST00000226791.1	ENSMUSG00000022607	Ptk2	PTK2 protein tyrosine kinase 2 [Source:MGI Symbol;Acc:MGI:95481]	517	NA	NA	NA	NA	NA	0	0	0	0	0
ENSMUST00000228457.1	ENSMUSG00000022607	Ptk2	PTK2 protein tyrosine kinase 2 [Source:MGI Symbol;Acc:MGI:95481]	259	NA	NA	NA	NA	NA	0	0	0	0	0
ENSMUST00000227686.1	ENSMUSG00000022607	Ptk2	PTK2 protein tyrosine kinase 2 [Source:MGI Symbol;Acc:MGI:95481]	485	NA	NA	NA	NA	NA	0	0	0	0	0
ENSMUST00000227395.1	ENSMUSG00000022607	Ptk2	PTK2 protein tyrosine kinase 2 [Source:MGI Symbol;Acc:MGI:95481]	498	NA	NA	NA	NA	NA	0	0	0	0	0
ENSMUST00000228628.1	ENSMUSG00000022607	Ptk2	PTK2 protein tyrosine kinase 2 [Source:MGI Symbol;Acc:MGI:95481]	3254	NA	NA	NA	NA	NA	0	0	0	0	0
ENSMUST00000226742.1	ENSMUSG00000022607	Ptk2	PTK2 protein tyrosine kinase 2 [Source:MGI Symbol;Acc:MGI:95481]	2820	NA	NA	NA	NA	NA	0	0	0	0	0
ENSMUST00000227569.1	ENSMUSG00000022607	Ptk2	PTK2 protein tyrosine kinase 2 [Source:MGI Symbol;Acc:MGI:95481]	4678	NA	124	NA	NA	69	0	1	0	0	4
ENSMUST00000226988.2	ENSMUSG00000022607	Ptk2	PTK2 protein tyrosine kinase 2 [Source:MGI Symbol;Acc:MGI:95481]	4675	166.190082644628	164.449275362318	157.684210526315	167.670731707317	166.377358490566	121	138	95	82	106
ENSMUST00000239146.1	ENSMUSG00000022607	Ptk2	PTK2 protein tyrosine kinase 2 [Source:MGI Symbol;Acc:MGI:95481]	4540	184.622222222222	172.160714285714	177.916666666666	181.8	158.290909090909	45	56	48	25	55
ENSMUST00000110036.10	ENSMUSG00000022607	Ptk2	PTK2 protein tyrosine kinase 2 [Source:MGI Symbol;Acc:MGI:95481]	4417	176.127272727272	159.090909090909	138.348837209302	156	164.929824561403	55	66	43	27	57
ENSMUST00000226454.1	ENSMUSG00000022607	Ptk2	PTK2 protein tyrosine kinase 2 [Source:MGI Symbol;Acc:MGI:95481]	542	NA	NA	NA	NA	NA	0	0	0	0	0
ENSMUST00000233645.1	ENSMUSG00000062078	Qk	quaking [Source:MGI Symbol;Acc:MGI:97837]	8547	168.174418604651	170.59420289855	138.31343283582	147.428571428571	163.466666666666	86	69	67	42	75
ENSMUST00000097414.10	ENSMUSG00000062078	Qk	quaking [Source:MGI Symbol;Acc:MGI:97837]	5832	163.827586206896	163.133333333333	160.208333333333	195.176470588235	155.538461538461	29	30	24	17	26
ENSMUST00000232721.1	ENSMUSG00000062078	Qk	quaking [Source:MGI Symbol;Acc:MGI:97837]	755	NA	NA	NA	NA	NA	0	0	0	0	0
ENSMUST00000042296.8	ENSMUSG00000062078	Qk	quaking [Source:MGI Symbol;Acc:MGI:97837]	6737	159.402714932126	177.169642857142	169.846153846153	158.388888888888	171.480952380952	221	224	221	144	210
ENSMUST00000233828.1	ENSMUSG00000062078	Qk	quaking [Source:MGI Symbol;Acc:MGI:97837]	5428	195.356164383561	192.875	177.196078431372	191.531914893617	194.142857142857	73	56	51	47	49
ENSMUST00000233684.1	ENSMUSG00000062078	Qk	quaking [Source:MGI Symbol;Acc:MGI:97837]	650	NA	NA	NA	NA	NA	0	0	0	0	0
ENSMUST00000220578.1	ENSMUSG00000073079	Srp54a	signal recognition particle 54A [Source:MGI Symbol;Acc:MGI:1346087]	4498	143.060402684563	132.630434782608	133.364406779661	128.572192513368	128.142857142857	298	276	236	187	210
ENSMUST00000221655.1	ENSMUSG00000073079	Srp54a	signal recognition particle 54A [Source:MGI Symbol;Acc:MGI:1346087]	472	NA	NA	NA	NA	NA	0	0	0	0	0
ENSMUST00000223111.1	ENSMUSG00000073079	Srp54a	signal recognition particle 54A [Source:MGI Symbol;Acc:MGI:1346087]	580	NA	NA	NA	NA	NA	0	0	0	0	0
ENSMUST00000221479.1	ENSMUSG00000073079	Srp54a	signal recognition particle 54A [Source:MGI Symbol;Acc:MGI:1346087]	1026	NA	173.5	210.666666666666	109	194.857142857142	0	2	3	1	7
ENSMUST00000222027.1	ENSMUSG00000073079	Srp54a	signal recognition particle 54A [Source:MGI Symbol;Acc:MGI:1346087]	428	93	176.333333333333	52.5	245	NA	1	3	2	1	0
ENSMUST00000021407.10	ENSMUSG00000073079	Srp54a	signal recognition particle 54A [Source:MGI Symbol;Acc:MGI:1346087]	1515	NA	NA	NA	NA	NA	0	0	0	0	0
ENSMUST00000032840.4	ENSMUSG00000030611	Mrps11	mitochondrial ribosomal protein S11 [Source:MGI Symbol;Acc:MGI:1915244]	1056	134.627118644067	116.310924369747	113.008771929824	123.353658536585	122.641791044776	118	119	114	82	134
ENSMUST00000123706.7	ENSMUSG00000030611	Mrps11	mitochondrial ribosomal protein S11 [Source:MGI Symbol;Acc:MGI:1915244]	924	NA	NA	NA	NA	NA	0	0	0	0	0
ENSMUST00000133304.6	ENSMUSG00000030611	Mrps11	mitochondrial ribosomal protein S11 [Source:MGI Symbol;Acc:MGI:1915244]	922	NA	NA	NA	NA	NA	0	0	0	0	0
ENSMUST00000133553.7	ENSMUSG00000030611	Mrps11	mitochondrial ribosomal protein S11 [Source:MGI Symbol;Acc:MGI:1915244]	825	160.823529411764	105.666666666666	115.212121212121	140.25	129.347826086956	17	24	33	12	23
ENSMUST00000136001.7	ENSMUSG00000030611	Mrps11	mitochondrial ribosomal protein S11 [Source:MGI Symbol;Acc:MGI:1915244]	548	NA	NA	NA	NA	NA	0	0	0	0	0
ENSMUST00000132922.1	ENSMUSG00000030611	Mrps11	mitochondrial ribosomal protein S11 [Source:MGI Symbol;Acc:MGI:1915244]	792	NA	NA	NA	NA	NA	0	0	0	0	0
ENSMUST00000199156.1	ENSMUSG00000040274	Cdk6	cyclin-dependent kinase 6 [Source:MGI Symbol;Acc:MGI:1277162]	425	NA	NA	106	NA	NA	0	0	1	0	0
ENSMUST00000197607.1	ENSMUSG00000040274	Cdk6	cyclin-dependent kinase 6 [Source:MGI Symbol;Acc:MGI:1277162]	376	NA	NA	NA	NA	NA	0	0	0	0	0
ENSMUST00000165117.7	ENSMUSG00000040274	Cdk6	cyclin-dependent kinase 6 [Source:MGI Symbol;Acc:MGI:1277162]	11525	134.333333333333	218.2	265	231.5	195	3	5	1	2	3
ENSMUST00000197385.1	ENSMUSG00000040274	Cdk6	cyclin-dependent kinase 6 [Source:MGI Symbol;Acc:MGI:1277162]	697	NA	NA	NA	NA	NA	0	0	0	0	0
ENSMUST00000199396.1	ENSMUSG00000040274	Cdk6	cyclin-dependent kinase 6 [Source:MGI Symbol;Acc:MGI:1277162]	2232	NA	NA	NA	NA	NA	0	0	0	0	0
ENSMUST00000042410.4	ENSMUSG00000040274	Cdk6	cyclin-dependent kinase 6 [Source:MGI Symbol;Acc:MGI:1277162]	2470	75	NA	NA	NA	NA	1	0	0	0	0
ENSMUST00000020150.9	ENSMUSG00000019975	Ikbip	IKBKB interacting protein [Source:MGI Symbol;Acc:MGI:1914704]	1328	133.970588235294	126.30303030303	119.95652173913	98.3333333333333	101.322580645161	34	33	23	27	31
ENSMUST00000020149.5	ENSMUSG00000019975	Ikbip	IKBKB interacting protein [Source:MGI Symbol;Acc:MGI:1914704]	3232	180.8	136.222222222222	132.375	79.5	118.5	5	9	8	2	8
ENSMUST00000128371.1	ENSMUSG00000019975	Ikbip	IKBKB interacting protein [Source:MGI Symbol;Acc:MGI:1914704]	418	NA	NA	NA	NA	NA	0	0	0	0	0
ENSMUST00000135152.1	ENSMUSG00000019975	Ikbip	IKBKB interacting protein [Source:MGI Symbol;Acc:MGI:1914704]	853	NA	NA	NA	NA	NA	0	0	0	0	0
ENSMUST00000130682.1	ENSMUSG00000019975	Ikbip	IKBKB interacting protein [Source:MGI Symbol;Acc:MGI:1914704]	839	NA	NA	NA	NA	NA	0	0	0	0	0
ENSMUST00000211056.1	ENSMUSG00000019975	Ikbip	IKBKB interacting protein [Source:MGI Symbol;Acc:MGI:1914704]	789	NA	NA	NA	NA	NA	0	0	0	0	0
ENSMUST00000075602.7	ENSMUSG00000070713	Gm10282	predicted pseudogene 10282 [Source:MGI Symbol;Acc:MGI:3704312]	1151	97	78	127.166666666666	105.571428571428	99.5	3	2	6	7	2
ENSMUST00000058476.13	ENSMUSG00000033510	Otud7a	OTU domain containing 7A [Source:MGI Symbol;Acc:MGI:2158505]	3483	130.033898305084	133.242424242424	131.045454545454	118.477272727272	119.925373134328	59	66	44	44	67
ENSMUST00000176734.1	ENSMUSG00000033510	Otud7a	OTU domain containing 7A [Source:MGI Symbol;Acc:MGI:2158505]	396	NA	NA	NA	NA	NA	0	0	0	0	0
ENSMUST00000177534.1	ENSMUSG00000033510	Otud7a	OTU domain containing 7A [Source:MGI Symbol;Acc:MGI:2158505]	2057	NA	NA	NA	NA	NA	0	0	0	0	0
ENSMUST00000177511.1	ENSMUSG00000033510	Otud7a	OTU domain containing 7A [Source:MGI Symbol;Acc:MGI:2158505]	651	NA	NA	NA	NA	NA	0	0	0	0	0
ENSMUST00000079113.4	ENSMUSG00000059206	Vmn1r71	vomeronasal 1 receptor 71 [Source:MGI Symbol;Acc:MGI:2182255]	4996	NA	NA	NA	NA	NA	0	0	0	0	0
ENSMUST00000226874.1	ENSMUSG00000059206	Vmn1r71	vomeronasal 1 receptor 71 [Source:MGI Symbol;Acc:MGI:2182255]	5194	NA	NA	NA	NA	NA	0	0	0	0	0
ENSMUST00000227003.1	ENSMUSG00000059206	Vmn1r71	vomeronasal 1 receptor 71 [Source:MGI Symbol;Acc:MGI:2182255]	5048	NA	NA	NA	NA	NA	0	0	0	0	0
ENSMUST00000228561.1	ENSMUSG00000059206	Vmn1r71	vomeronasal 1 receptor 71 [Source:MGI Symbol;Acc:MGI:2182255]	4747	NA	NA	NA	NA	NA	0	0	0	0	0
ENSMUST00000228248.1	ENSMUSG00000059206	Vmn1r71	vomeronasal 1 receptor 71 [Source:MGI Symbol;Acc:MGI:2182255]	5469	NA	NA	NA	NA	NA	0	0	0	0	0
ENSMUST00000228526.1	ENSMUSG00000059206	Vmn1r71	vomeronasal 1 receptor 71 [Source:MGI Symbol;Acc:MGI:2182255]	5137	NA	NA	NA	NA	NA	0	0	0	0	0
ENSMUST00000228098.1	ENSMUSG00000059206	Vmn1r71	vomeronasal 1 receptor 71 [Source:MGI Symbol;Acc:MGI:2182255]	7165	NA	NA	NA	NA	NA	0	0	0	0	0
ENSMUST00000227940.1	ENSMUSG00000059206	Vmn1r71	vomeronasal 1 receptor 71 [Source:MGI Symbol;Acc:MGI:2182255]	4725	NA	NA	NA	NA	NA	0	0	0	0	0
ENSMUST00000228374.1	ENSMUSG00000059206	Vmn1r71	vomeronasal 1 receptor 71 [Source:MGI Symbol;Acc:MGI:2182255]	3717	NA	NA	NA	NA	NA	0	0	0	0	0
ENSMUST00000227702.1	ENSMUSG00000059206	Vmn1r71	vomeronasal 1 receptor 71 [Source:MGI Symbol;Acc:MGI:2182255]	5034	NA	NA	NA	NA	NA	0	0	0	0	0
ENSMUST00000167093.2	ENSMUSG00000090572	Vmn2r109	vomeronasal 2, receptor 109 [Source:MGI Symbol;Acc:MGI:3646711]	3125	NA	NA	NA	NA	NA	0	0	0	0	0
ENSMUST00000206880.1	ENSMUSG00000046321	Hs3st2	heparan sulfate (glucosamine) 3-O-sulfotransferase 2 [Source:MGI Symbol;Acc:MGI:1333802]	1149	NA	123	207	204	NA	0	1	1	2	0
ENSMUST00000084628.4	ENSMUSG00000046321	Hs3st2	heparan sulfate (glucosamine) 3-O-sulfotransferase 2 [Source:MGI Symbol;Acc:MGI:1333802]	2278	122.891428571428	121.412844036697	123.806603773584	126.240259740259	116.538461538461	175	218	212	154	221
ENSMUST00000117706.7	ENSMUSG00000079487	Med12	mediator complex subunit 12 [Source:MGI Symbol;Acc:MGI:1926212]	6940	256	71	122	188	274	2	1	1	1	1
ENSMUST00000117203.7	ENSMUSG00000079487	Med12	mediator complex subunit 12 [Source:MGI Symbol;Acc:MGI:1926212]	6816	NA	321	NA	NA	172.5	0	1	0	0	2
ENSMUST00000087948.10	ENSMUSG00000079487	Med12	mediator complex subunit 12 [Source:MGI Symbol;Acc:MGI:1926212]	6809	230.6	242.222222222222	239	206.666666666666	223.619047619047	20	18	5	6	21
ENSMUST00000087956.5	ENSMUSG00000079487	Med12	mediator complex subunit 12 [Source:MGI Symbol;Acc:MGI:1926212]	6746	216	254.75	134.5	364	309	1	4	2	1	1
ENSMUST00000156131.1	ENSMUSG00000079487	Med12	mediator complex subunit 12 [Source:MGI Symbol;Acc:MGI:1926212]	802	NA	NA	NA	NA	NA	0	0	0	0	0
ENSMUST00000146877.1	ENSMUSG00000079487	Med12	mediator complex subunit 12 [Source:MGI Symbol;Acc:MGI:1926212]	521	NA	NA	NA	NA	NA	0	0	0	0	0
ENSMUST00000148846.7	ENSMUSG00000079487	Med12	mediator complex subunit 12 [Source:MGI Symbol;Acc:MGI:1926212]	3273	286.555555555555	389.5	190	214	195.8	9	2	5	2	5
ENSMUST00000132269.1	ENSMUSG00000079487	Med12	mediator complex subunit 12 [Source:MGI Symbol;Acc:MGI:1926212]	881	NA	NA	NA	NA	NA	0	0	0	0	0
ENSMUST00000137664.1	ENSMUSG00000079487	Med12	mediator complex subunit 12 [Source:MGI Symbol;Acc:MGI:1926212]	448	NA	NA	NA	NA	NA	0	0	0	0	0
ENSMUST00000067912.7	ENSMUSG00000055148	Klf2	Kruppel-like factor 2 (lung) [Source:MGI Symbol;Acc:MGI:1342772]	1847	158.098039215686	146.552	146	122.684210526315	152.95	102	125	85	57	80
ENSMUST00000028781.8	ENSMUSG00000027312	Atrn	attractin [Source:MGI Symbol;Acc:MGI:1341628]	8745	168.093333333333	163.919254658385	164.462809917355	160.588235294117	157.494736842105	300	322	242	170	285
ENSMUST00000134964.7	ENSMUSG00000027312	Atrn	attractin [Source:MGI Symbol;Acc:MGI:1341628]	4668	NA	NA	NA	NA	NA	0	0	0	0	0
ENSMUST00000156982.1	ENSMUSG00000027312	Atrn	attractin [Source:MGI Symbol;Acc:MGI:1341628]	530	NA	NA	NA	NA	NA	0	0	0	0	0
ENSMUST00000132557.1	ENSMUSG00000027312	Atrn	attractin [Source:MGI Symbol;Acc:MGI:1341628]	637	NA	NA	NA	NA	NA	0	0	0	0	0
ENSMUST00000151364.1	ENSMUSG00000027312	Atrn	attractin [Source:MGI Symbol;Acc:MGI:1341628]	4139	90	NA	NA	NA	NA	1	0	0	0	0
ENSMUST00000038107.8	ENSMUSG00000039910	Cited2	Cbp/p300-interacting transactivator, with Glu/Asp-rich carboxy-terminal domain, 2 [Source:MGI Symbol;Acc:MGI:1306784]	1979	136.295454545454	132.095	138.741463414634	135.761904761904	131.904761904761	176	200	205	126	168
ENSMUST00000219558.1	ENSMUSG00000039910	Cited2	Cbp/p300-interacting transactivator, with Glu/Asp-rich carboxy-terminal domain, 2 [Source:MGI Symbol;Acc:MGI:1306784]	2411	166.25	136.285714285714	56	91	239.25	4	7	1	1	4
ENSMUST00000218370.1	ENSMUSG00000039910	Cited2	Cbp/p300-interacting transactivator, with Glu/Asp-rich carboxy-terminal domain, 2 [Source:MGI Symbol;Acc:MGI:1306784]	376	NA	NA	NA	NA	NA	0	0	0	0	0
ENSMUST00000073543.1	ENSMUSG00000057890	Olfr1375	olfactory receptor 1375 [Source:MGI Symbol;Acc:MGI:3031209]	942	NA	NA	NA	NA	NA	0	0	0	0	0
ENSMUST00000169559.2	ENSMUSG00000091259	Vmn2r110	vomeronasal 2, receptor 110 [Source:MGI Symbol;Acc:MGI:3644602]	8810	NA	NA	NA	NA	NA	0	0	0	0	0
ENSMUST00000232904.1	ENSMUSG00000091259	Vmn2r110	vomeronasal 2, receptor 110 [Source:MGI Symbol;Acc:MGI:3644602]	9104	NA	NA	NA	NA	NA	0	0	0	0	0
ENSMUST00000233022.1	ENSMUSG00000091259	Vmn2r110	vomeronasal 2, receptor 110 [Source:MGI Symbol;Acc:MGI:3644602]	8747	NA	NA	NA	NA	NA	0	0	0	0	0
ENSMUST00000233630.1	ENSMUSG00000091259	Vmn2r110	vomeronasal 2, receptor 110 [Source:MGI Symbol;Acc:MGI:3644602]	9041	NA	NA	NA	NA	NA	0	0	0	0	0
ENSMUST00000204057.1	ENSMUSG00000045725	Prr15	proline rich 15 [Source:MGI Symbol;Acc:MGI:1925254]	2074	NA	NA	NA	NA	NA	0	0	0	0	0
ENSMUST00000059138.5	ENSMUSG00000045725	Prr15	proline rich 15 [Source:MGI Symbol;Acc:MGI:1925254]	1511	139.5	222	126	167	NA	4	1	1	1	0
ENSMUST00000045388.7	ENSMUSG00000039246	Lyplal1	lysophospholipase-like 1 [Source:MGI Symbol;Acc:MGI:2385115]	1578	135.447368421052	141.533333333333	127.275862068965	191.125	134.642857142857	38	30	29	16	28
ENSMUST00000195481.1	ENSMUSG00000039246	Lyplal1	lysophospholipase-like 1 [Source:MGI Symbol;Acc:MGI:2385115]	584	NA	NA	NA	NA	NA	0	0	0	0	0
ENSMUST00000026866.14	ENSMUSG00000059834	Sclt1	sodium channel and clathrin linker 1 [Source:MGI Symbol;Acc:MGI:1914411]	3005	240	215.55	237.066666666666	191.25	179.571428571428	17	20	15	8	21
ENSMUST00000146125.7	ENSMUSG00000059834	Sclt1	sodium channel and clathrin linker 1 [Source:MGI Symbol;Acc:MGI:1914411]	2292	43.5	127.333333333333	49	56	62	2	3	1	1	1
ENSMUST00000148769.7	ENSMUSG00000059834	Sclt1	sodium channel and clathrin linker 1 [Source:MGI Symbol;Acc:MGI:1914411]	2769	NA	NA	NA	65	NA	0	0	0	1	0
ENSMUST00000142908.2	ENSMUSG00000059834	Sclt1	sodium channel and clathrin linker 1 [Source:MGI Symbol;Acc:MGI:1914411]	737	NA	NA	NA	NA	NA	0	0	0	0	0
ENSMUST00000140373.7	ENSMUSG00000059834	Sclt1	sodium channel and clathrin linker 1 [Source:MGI Symbol;Acc:MGI:1914411]	2865	NA	NA	NA	NA	NA	0	0	0	0	0
ENSMUST00000154773.1	ENSMUSG00000059834	Sclt1	sodium channel and clathrin linker 1 [Source:MGI Symbol;Acc:MGI:1914411]	493	NA	NA	NA	NA	NA	0	0	0	0	0
ENSMUST00000156279.2	ENSMUSG00000059834	Sclt1	sodium channel and clathrin linker 1 [Source:MGI Symbol;Acc:MGI:1914411]	2233	NA	NA	NA	NA	NA	0	0	0	0	0
ENSMUST00000191629.1	ENSMUSG00000059834	Sclt1	sodium channel and clathrin linker 1 [Source:MGI Symbol;Acc:MGI:1914411]	887	NA	NA	NA	NA	NA	0	0	0	0	0
ENSMUST00000130150.7	ENSMUSG00000030428	Ttyh1	tweety family member 1 [Source:MGI Symbol;Acc:MGI:1889007]	446	NA	NA	NA	NA	NA	0	0	0	0	0
ENSMUST00000126971.7	ENSMUSG00000030428	Ttyh1	tweety family member 1 [Source:MGI Symbol;Acc:MGI:1889007]	2513	130	162	98.6	142	52.5	2	6	10	3	4
ENSMUST00000119661.7	ENSMUSG00000030428	Ttyh1	tweety family member 1 [Source:MGI Symbol;Acc:MGI:1889007]	2512	124.090163934426	113.327272727272	119.836879432624	126.123456790123	118.314285714285	122	110	141	81	105
ENSMUST00000129423.7	ENSMUSG00000030428	Ttyh1	tweety family member 1 [Source:MGI Symbol;Acc:MGI:1889007]	4355	144.553895410885	139.685602350636	134.437751004016	132.290423861852	138.537777777777	937	1021	996	637	900
ENSMUST00000148760.7	ENSMUSG00000030428	Ttyh1	tweety family member 1 [Source:MGI Symbol;Acc:MGI:1889007]	609	NA	NA	NA	1	16	0	0	0	1	1
ENSMUST00000079415.11	ENSMUSG00000030428	Ttyh1	tweety family member 1 [Source:MGI Symbol;Acc:MGI:1889007]	2882	158.5	154.289855072463	135.969387755102	150.355263157894	140.836538461538	122	138	98	76	104
ENSMUST00000206987.1	ENSMUSG00000030428	Ttyh1	tweety family member 1 [Source:MGI Symbol;Acc:MGI:1889007]	582	NA	NA	NA	NA	NA	0	0	0	0	0
ENSMUST00000153673.7	ENSMUSG00000030428	Ttyh1	tweety family member 1 [Source:MGI Symbol;Acc:MGI:1889007]	655	NA	NA	NA	NA	NA	0	0	0	0	0
ENSMUST00000032594.12	ENSMUSG00000030428	Ttyh1	tweety family member 1 [Source:MGI Symbol;Acc:MGI:1889007]	2713	131.872881355932	142.280303030303	139.747747747747	131.324324324324	131.121212121212	118	132	111	74	99
ENSMUST00000151959.7	ENSMUSG00000030428	Ttyh1	tweety family member 1 [Source:MGI Symbol;Acc:MGI:1889007]	408	NA	NA	NA	NA	NA	0	0	0	0	0
ENSMUST00000134536.7	ENSMUSG00000030428	Ttyh1	tweety family member 1 [Source:MGI Symbol;Acc:MGI:1889007]	2649	123.35294117647	128.209876543209	118.733333333333	128.25	123.483870967741	68	81	75	56	62
ENSMUST00000206869.1	ENSMUSG00000030428	Ttyh1	tweety family member 1 [Source:MGI Symbol;Acc:MGI:1889007]	1491	136.875	165.709677419354	122.46875	134	123.346153846153	16	31	32	16	26
ENSMUST00000205971.1	ENSMUSG00000030428	Ttyh1	tweety family member 1 [Source:MGI Symbol;Acc:MGI:1889007]	740	NA	NA	NA	NA	NA	0	0	0	0	0
ENSMUST00000132400.1	ENSMUSG00000030428	Ttyh1	tweety family member 1 [Source:MGI Symbol;Acc:MGI:1889007]	575	NA	5	NA	NA	NA	0	1	0	0	0
ENSMUST00000148951.7	ENSMUSG00000030428	Ttyh1	tweety family member 1 [Source:MGI Symbol;Acc:MGI:1889007]	569	NA	NA	NA	NA	NA	0	0	0	0	0
ENSMUST00000128317.1	ENSMUSG00000030428	Ttyh1	tweety family member 1 [Source:MGI Symbol;Acc:MGI:1889007]	711	NA	NA	NA	NA	NA	0	0	0	0	0
ENSMUST00000139789.1	ENSMUSG00000030428	Ttyh1	tweety family member 1 [Source:MGI Symbol;Acc:MGI:1889007]	773	177.4	133.25	283.333333333333	209	113.5	10	4	3	3	2
ENSMUST00000140637.1	ENSMUSG00000030428	Ttyh1	tweety family member 1 [Source:MGI Symbol;Acc:MGI:1889007]	417	NA	NA	NA	NA	NA	0	0	0	0	0
ENSMUST00000098657.4	ENSMUSG00000074254	Cyp2a4	cytochrome P450, family 2, subfamily a, polypeptide 4 [Source:MGI Symbol;Acc:MGI:88596]	1738	NA	NA	NA	NA	NA	0	0	0	0	0
ENSMUST00000094077.4	ENSMUSG00000018476	Kdm6b	KDM1 lysine (K)-specific demethylase 6B [Source:MGI Symbol;Acc:MGI:2448492]	6654	231.388888888888	249.105263157894	181.75	201.2	229.933333333333	18	19	8	10	15
ENSMUST00000156562.1	ENSMUSG00000018476	Kdm6b	KDM1 lysine (K)-specific demethylase 6B [Source:MGI Symbol;Acc:MGI:2448492]	743	NA	NA	NA	NA	NA	0	0	0	0	0
ENSMUST00000123239.1	ENSMUSG00000058571	Gpc6	glypican 6 [Source:MGI Symbol;Acc:MGI:1346322]	4146	NA	NA	NA	156	NA	0	0	0	1	0
ENSMUST00000088483.9	ENSMUSG00000058571	Gpc6	glypican 6 [Source:MGI Symbol;Acc:MGI:1346322]	3488	51	89	NA	164	84	1	1	0	1	1
ENSMUST00000125435.1	ENSMUSG00000058571	Gpc6	glypican 6 [Source:MGI Symbol;Acc:MGI:1346322]	2423	NA	NA	NA	152.5	NA	0	0	0	2	0
ENSMUST00000078849.11	ENSMUSG00000058571	Gpc6	glypican 6 [Source:MGI Symbol;Acc:MGI:1346322]	1668	NA	NA	NA	NA	NA	0	0	0	0	0
ENSMUST00000190825.6	ENSMUSG00000026439	Rbbp5	retinoblastoma binding protein 5, histone lysine methyltransferase complex subunit [Source:MGI Symbol;Acc:MGI:1918367]	2456	NA	NA	NA	NA	NA	0	0	0	0	0
ENSMUST00000190997.6	ENSMUSG00000026439	Rbbp5	retinoblastoma binding protein 5, histone lysine methyltransferase complex subunit [Source:MGI Symbol;Acc:MGI:1918367]	2856	98.5	122	196	37	NA	4	2	1	1	0
ENSMUST00000187505.6	ENSMUSG00000026439	Rbbp5	retinoblastoma binding protein 5, histone lysine methyltransferase complex subunit [Source:MGI Symbol;Acc:MGI:1918367]	1977	NA	NA	NA	NA	NA	0	0	0	0	0
ENSMUST00000027700.14	ENSMUSG00000026439	Rbbp5	retinoblastoma binding protein 5, histone lysine methyltransferase complex subunit [Source:MGI Symbol;Acc:MGI:1918367]	3385	168.186666666666	167.90625	159.60465116279	154.489795918367	167.440476190476	75	96	86	49	84
ENSMUST00000188575.6	ENSMUSG00000026439	Rbbp5	retinoblastoma binding protein 5, histone lysine methyltransferase complex subunit [Source:MGI Symbol;Acc:MGI:1918367]	339	NA	NA	NA	NA	NA	0	0	0	0	0
ENSMUST00000189786.2	ENSMUSG00000026439	Rbbp5	retinoblastoma binding protein 5, histone lysine methyltransferase complex subunit [Source:MGI Symbol;Acc:MGI:1918367]	716	NA	NA	NA	NA	NA	0	0	0	0	0
ENSMUST00000187834.1	ENSMUSG00000026439	Rbbp5	retinoblastoma binding protein 5, histone lysine methyltransferase complex subunit [Source:MGI Symbol;Acc:MGI:1918367]	1923	239.2	238.266666666666	217.571428571428	245.666666666666	229	15	15	7	6	4
ENSMUST00000179096.1	ENSMUSG00000095240	Cypt14	cysteine-rich perinuclear theca 14 [Source:MGI Symbol;Acc:MGI:3616459]	508	NA	NA	NA	NA	NA	0	0	0	0	0
ENSMUST00000102508.9	ENSMUSG00000028745	Capzb	capping protein (actin filament) muscle Z-line, beta [Source:MGI Symbol;Acc:MGI:104652]	1674	111.123422159887	113.011251758087	112.170694864048	115.046413502109	113.271186440677	713	711	662	474	649
ENSMUST00000131912.7	ENSMUSG00000028745	Capzb	capping protein (actin filament) muscle Z-line, beta [Source:MGI Symbol;Acc:MGI:104652]	669	NA	NA	NA	NA	NA	0	0	0	0	0
ENSMUST00000102507.9	ENSMUSG00000028745	Capzb	capping protein (actin filament) muscle Z-line, beta [Source:MGI Symbol;Acc:MGI:104652]	1702	113.323529411764	110.628571428571	117.232142857142	110.75	111.863636363636	68	70	56	44	66
ENSMUST00000131793.1	ENSMUSG00000028745	Capzb	capping protein (actin filament) muscle Z-line, beta [Source:MGI Symbol;Acc:MGI:104652]	353	NA	NA	NA	NA	164	0	0	0	0	1
ENSMUST00000150077.1	ENSMUSG00000028745	Capzb	capping protein (actin filament) muscle Z-line, beta [Source:MGI Symbol;Acc:MGI:104652]	1559	118.777777777777	151.30303030303	127.9	119.95652173913	117.54054054054	27	33	30	23	37
ENSMUST00000030518.15	ENSMUSG00000028745	Capzb	capping protein (actin filament) muscle Z-line, beta [Source:MGI Symbol;Acc:MGI:104652]	1390	117.166666666666	133.6	105.76923076923	64	142.875	6	10	13	1	8
ENSMUST00000156760.1	ENSMUSG00000028745	Capzb	capping protein (actin filament) muscle Z-line, beta [Source:MGI Symbol;Acc:MGI:104652]	632	NA	NA	NA	NA	NA	0	0	0	0	0
ENSMUST00000145368.7	ENSMUSG00000028745	Capzb	capping protein (actin filament) muscle Z-line, beta [Source:MGI Symbol;Acc:MGI:104652]	388	NA	NA	NA	NA	NA	0	0	0	0	0
ENSMUST00000138045.7	ENSMUSG00000028745	Capzb	capping protein (actin filament) muscle Z-line, beta [Source:MGI Symbol;Acc:MGI:104652]	730	NA	NA	NA	NA	NA	0	0	0	0	0
ENSMUST00000042675.8	ENSMUSG00000028745	Capzb	capping protein (actin filament) muscle Z-line, beta [Source:MGI Symbol;Acc:MGI:104652]	1604	147.142857142857	107.636363636363	126.529411764705	139.777777777777	127.166666666666	14	22	17	9	6
ENSMUST00000132385.1	ENSMUSG00000028745	Capzb	capping protein (actin filament) muscle Z-line, beta [Source:MGI Symbol;Acc:MGI:104652]	498	NA	NA	NA	NA	NA	0	0	0	0	0
ENSMUST00000097888.9	ENSMUSG00000041530	Ago1	argonaute RISC catalytic subunit 1 [Source:MGI Symbol;Acc:MGI:2446630]	7227	192.95238095238	186.340206185567	172.776119402985	171.075471698113	165.179487179487	84	97	67	53	78
ENSMUST00000127800.1	ENSMUSG00000041530	Ago1	argonaute RISC catalytic subunit 1 [Source:MGI Symbol;Acc:MGI:2446630]	3606	61.5	50	NA	NA	NA	2	1	0	0	0
ENSMUST00000176315.1	ENSMUSG00000041530	Ago1	argonaute RISC catalytic subunit 1 [Source:MGI Symbol;Acc:MGI:2446630]	1662	NA	NA	NA	NA	NA	0	0	0	0	0
ENSMUST00000156533.1	ENSMUSG00000041530	Ago1	argonaute RISC catalytic subunit 1 [Source:MGI Symbol;Acc:MGI:2446630]	588	NA	NA	NA	NA	NA	0	0	0	0	0
ENSMUST00000149425.1	ENSMUSG00000041530	Ago1	argonaute RISC catalytic subunit 1 [Source:MGI Symbol;Acc:MGI:2446630]	678	227.5	111	31	NA	193	2	2	1	0	1
ENSMUST00000056470.9	ENSMUSG00000055560	Zfp459	zinc finger protein 459 [Source:MGI Symbol;Acc:MGI:3040701]	3334	125.571428571428	189	182.142857142857	140	143.222222222222	7	6	7	1	9
ENSMUST00000224113.1	ENSMUSG00000055560	Zfp459	zinc finger protein 459 [Source:MGI Symbol;Acc:MGI:3040701]	646	NA	NA	NA	NA	NA	0	0	0	0	0
ENSMUST00000223644.1	ENSMUSG00000055560	Zfp459	zinc finger protein 459 [Source:MGI Symbol;Acc:MGI:3040701]	441	NA	NA	NA	NA	NA	0	0	0	0	0
ENSMUST00000224496.1	ENSMUSG00000055560	Zfp459	zinc finger protein 459 [Source:MGI Symbol;Acc:MGI:3040701]	504	NA	NA	NA	NA	170	0	0	0	0	1
ENSMUST00000007340.3	ENSMUSG00000022229	Atp12a	ATPase, H+/K+ transporting, nongastric, alpha polypeptide [Source:MGI Symbol;Acc:MGI:1926943]	3950	NA	NA	NA	NA	NA	0	0	0	0	0
ENSMUST00000225698.1	ENSMUSG00000022229	Atp12a	ATPase, H+/K+ transporting, nongastric, alpha polypeptide [Source:MGI Symbol;Acc:MGI:1926943]	453	NA	NA	NA	NA	NA	0	0	0	0	0
ENSMUST00000132855.7	ENSMUSG00000086040	Wipf3	WAS/WASL interacting protein family, member 3 [Source:MGI Symbol;Acc:MGI:3044681]	4516	150.818181818181	154.421875	144.66037735849	159.794871794871	156.75	66	64	53	39	64
ENSMUST00000126637.7	ENSMUSG00000086040	Wipf3	WAS/WASL interacting protein family, member 3 [Source:MGI Symbol;Acc:MGI:3044681]	4414	162.5625	139.813559322033	158.462962962962	131.354166666666	147.35294117647	48	59	54	48	51
ENSMUST00000128480.1	ENSMUSG00000086040	Wipf3	WAS/WASL interacting protein family, member 3 [Source:MGI Symbol;Acc:MGI:3044681]	591	NA	NA	NA	NA	NA	0	0	0	0	0
ENSMUST00000131043.1	ENSMUSG00000086040	Wipf3	WAS/WASL interacting protein family, member 3 [Source:MGI Symbol;Acc:MGI:3044681]	2660	NA	NA	NA	NA	310	0	0	0	0	1
ENSMUST00000163746.7	ENSMUSG00000086040	Wipf3	WAS/WASL interacting protein family, member 3 [Source:MGI Symbol;Acc:MGI:3044681]	4102	154.064516129032	149.073529411764	156.243243243243	126.491803278688	163.298850574712	93	68	74	61	87
ENSMUST00000172046.1	ENSMUSG00000086040	Wipf3	WAS/WASL interacting protein family, member 3 [Source:MGI Symbol;Acc:MGI:3044681]	4204	153.494736842105	147.58	157.504950495049	140.737704918032	160.153846153846	95	50	101	61	78
ENSMUST00000174552.7	ENSMUSG00000048264	Dip2c	disco interacting protein 2 homolog C [Source:MGI Symbol;Acc:MGI:1920179]	8023	154.366666666666	155.923809523809	166.18691588785	151.337209302325	159.021052631578	120	105	107	86	95
ENSMUST00000169960.9	ENSMUSG00000048264	Dip2c	disco interacting protein 2 homolog C [Source:MGI Symbol;Acc:MGI:1920179]	4801	NA	NA	NA	8	NA	0	0	0	1	0
ENSMUST00000222280.1	ENSMUSG00000048264	Dip2c	disco interacting protein 2 homolog C [Source:MGI Symbol;Acc:MGI:1920179]	2813	130.5	167	123.5	NA	NA	2	1	2	0	0
ENSMUST00000166299.1	ENSMUSG00000048264	Dip2c	disco interacting protein 2 homolog C [Source:MGI Symbol;Acc:MGI:1920179]	4822	NA	NA	NA	NA	NA	0	0	0	0	0
ENSMUST00000002699.6	ENSMUSG00000024045	Akap8	A kinase (PRKA) anchor protein 8 [Source:MGI Symbol;Acc:MGI:1928488]	3731	211.677419354838	228.948717948717	177.888888888888	231.045454545454	218.038461538461	31	39	27	22	26
ENSMUST00000235205.1	ENSMUSG00000024045	Akap8	A kinase (PRKA) anchor protein 8 [Source:MGI Symbol;Acc:MGI:1928488]	4183	228.318181818181	212.137931034482	188.391304347826	222.6	191.4375	22	29	23	15	16
ENSMUST00000237103.1	ENSMUSG00000024045	Akap8	A kinase (PRKA) anchor protein 8 [Source:MGI Symbol;Acc:MGI:1928488]	4071	247.692307692307	270.333333333333	219	253.733333333333	225.727272727272	13	15	9	15	22
ENSMUST00000237381.1	ENSMUSG00000024045	Akap8	A kinase (PRKA) anchor protein 8 [Source:MGI Symbol;Acc:MGI:1928488]	4570	248.666666666666	229.32	229.222222222222	228.9	252.2	36	25	9	10	25
ENSMUST00000236267.1	ENSMUSG00000024045	Akap8	A kinase (PRKA) anchor protein 8 [Source:MGI Symbol;Acc:MGI:1928488]	1881	NA	278	246	203	NA	0	1	1	1	0
ENSMUST00000235764.1	ENSMUSG00000024045	Akap8	A kinase (PRKA) anchor protein 8 [Source:MGI Symbol;Acc:MGI:1928488]	3260	283	226	NA	193	282.5	1	2	0	2	2
ENSMUST00000236954.1	ENSMUSG00000024045	Akap8	A kinase (PRKA) anchor protein 8 [Source:MGI Symbol;Acc:MGI:1928488]	2021	NA	NA	NA	NA	NA	0	0	0	0	0
ENSMUST00000236303.1	ENSMUSG00000024045	Akap8	A kinase (PRKA) anchor protein 8 [Source:MGI Symbol;Acc:MGI:1928488]	672	NA	NA	NA	NA	NA	0	0	0	0	0
ENSMUST00000238151.1	ENSMUSG00000024045	Akap8	A kinase (PRKA) anchor protein 8 [Source:MGI Symbol;Acc:MGI:1928488]	799	NA	NA	NA	NA	NA	0	0	0	0	0
ENSMUST00000237733.1	ENSMUSG00000024045	Akap8	A kinase (PRKA) anchor protein 8 [Source:MGI Symbol;Acc:MGI:1928488]	4358	NA	NA	NA	NA	NA	0	0	0	0	0
ENSMUST00000236785.1	ENSMUSG00000024045	Akap8	A kinase (PRKA) anchor protein 8 [Source:MGI Symbol;Acc:MGI:1928488]	517	NA	NA	NA	NA	NA	0	0	0	0	0
ENSMUST00000236761.1	ENSMUSG00000024045	Akap8	A kinase (PRKA) anchor protein 8 [Source:MGI Symbol;Acc:MGI:1928488]	334	NA	NA	NA	NA	NA	0	0	0	0	0
ENSMUST00000237860.1	ENSMUSG00000024045	Akap8	A kinase (PRKA) anchor protein 8 [Source:MGI Symbol;Acc:MGI:1928488]	741	NA	NA	NA	NA	NA	0	0	0	0	0
ENSMUST00000236580.1	ENSMUSG00000024045	Akap8	A kinase (PRKA) anchor protein 8 [Source:MGI Symbol;Acc:MGI:1928488]	402	NA	NA	NA	NA	NA	0	0	0	0	0
ENSMUST00000235360.1	ENSMUSG00000024045	Akap8	A kinase (PRKA) anchor protein 8 [Source:MGI Symbol;Acc:MGI:1928488]	467	NA	NA	137	NA	NA	0	0	1	0	0
ENSMUST00000235702.1	ENSMUSG00000024045	Akap8	A kinase (PRKA) anchor protein 8 [Source:MGI Symbol;Acc:MGI:1928488]	437	NA	NA	NA	NA	NA	0	0	0	0	0
ENSMUST00000194563.5	ENSMUSG00000026116	Tmem131	transmembrane protein 131 [Source:MGI Symbol;Acc:MGI:1927110]	6698	168.5	185.469879518072	174.25641025641	174.315789473684	173.830508474576	64	83	39	38	59
ENSMUST00000191381.1	ENSMUSG00000026116	Tmem131	transmembrane protein 131 [Source:MGI Symbol;Acc:MGI:1927110]	3969	NA	NA	NA	NA	NA	0	0	0	0	0
ENSMUST00000187917.1	ENSMUSG00000026116	Tmem131	transmembrane protein 131 [Source:MGI Symbol;Acc:MGI:1927110]	703	NA	NA	NA	NA	NA	0	0	0	0	0
ENSMUST00000189470.1	ENSMUSG00000026116	Tmem131	transmembrane protein 131 [Source:MGI Symbol;Acc:MGI:1927110]	696	NA	122	NA	118	NA	0	1	0	1	0
ENSMUST00000190442.1	ENSMUSG00000026116	Tmem131	transmembrane protein 131 [Source:MGI Symbol;Acc:MGI:1927110]	515	NA	NA	NA	NA	NA	0	0	0	0	0
ENSMUST00000186486.1	ENSMUSG00000026116	Tmem131	transmembrane protein 131 [Source:MGI Symbol;Acc:MGI:1927110]	682	NA	NA	NA	NA	NA	0	0	0	0	0
ENSMUST00000185964.2	ENSMUSG00000026116	Tmem131	transmembrane protein 131 [Source:MGI Symbol;Acc:MGI:1927110]	591	NA	NA	NA	NA	NA	0	0	0	0	0
ENSMUST00000027290.11	ENSMUSG00000026116	Tmem131	transmembrane protein 131 [Source:MGI Symbol;Acc:MGI:1927110]	6546	180.484375	178.513888888888	147.595744680851	194.157894736842	163.807692307692	64	72	47	38	52
ENSMUST00000125812.7	ENSMUSG00000000308	Ckmt1	creatine kinase, mitochondrial 1, ubiquitous [Source:MGI Symbol;Acc:MGI:99441]	850	169	NA	208.333333333333	31	324	2	0	3	1	1
ENSMUST00000078222.8	ENSMUSG00000000308	Ckmt1	creatine kinase, mitochondrial 1, ubiquitous [Source:MGI Symbol;Acc:MGI:99441]	1518	108.96875	118.37912087912	120.38961038961	108.078431372549	122.630136986301	192	182	154	102	146
ENSMUST00000125221.2	ENSMUSG00000000308	Ckmt1	creatine kinase, mitochondrial 1, ubiquitous [Source:MGI Symbol;Acc:MGI:99441]	565	NA	NA	NA	NA	NA	0	0	0	0	0
ENSMUST00000150271.7	ENSMUSG00000000308	Ckmt1	creatine kinase, mitochondrial 1, ubiquitous [Source:MGI Symbol;Acc:MGI:99441]	851	NA	NA	NA	NA	NA	0	0	0	0	0
ENSMUST00000000317.12	ENSMUSG00000000308	Ckmt1	creatine kinase, mitochondrial 1, ubiquitous [Source:MGI Symbol;Acc:MGI:99441]	1620	116.874715261959	109.884328358208	116.753846153846	115.022082018927	120.563909774436	439	536	390	317	399
ENSMUST00000126130.1	ENSMUSG00000000308	Ckmt1	creatine kinase, mitochondrial 1, ubiquitous [Source:MGI Symbol;Acc:MGI:99441]	703	NA	NA	NA	NA	NA	0	0	0	0	0
ENSMUST00000145380.1	ENSMUSG00000000308	Ckmt1	creatine kinase, mitochondrial 1, ubiquitous [Source:MGI Symbol;Acc:MGI:99441]	959	229	NA	NA	NA	NA	1	0	0	0	0
ENSMUST00000129130.2	ENSMUSG00000000308	Ckmt1	creatine kinase, mitochondrial 1, ubiquitous [Source:MGI Symbol;Acc:MGI:99441]	796	NA	NA	NA	NA	NA	0	0	0	0	0
ENSMUST00000128612.1	ENSMUSG00000000308	Ckmt1	creatine kinase, mitochondrial 1, ubiquitous [Source:MGI Symbol;Acc:MGI:99441]	695	NA	NA	NA	NA	NA	0	0	0	0	0
ENSMUST00000153040.1	ENSMUSG00000000308	Ckmt1	creatine kinase, mitochondrial 1, ubiquitous [Source:MGI Symbol;Acc:MGI:99441]	422	81.4285714285714	124	138.583333333333	109.333333333333	154.111111111111	7	10	12	3	9
ENSMUST00000175676.1	ENSMUSG00000039891	Txlnb	taxilin beta [Source:MGI Symbol;Acc:MGI:2671945]	1786	NA	NA	NA	NA	NA	0	0	0	0	0
ENSMUST00000037964.6	ENSMUSG00000039891	Txlnb	taxilin beta [Source:MGI Symbol;Acc:MGI:2671945]	4422	NA	176.25	165	NA	104	0	4	4	0	1
ENSMUST00000071189.1	ENSMUSG00000060701	Fpr-rs3	formyl peptide receptor, related sequence 3 [Source:MGI Symbol;Acc:MGI:1278318]	1032	NA	NA	NA	NA	NA	0	0	0	0	0
ENSMUST00000071400.12	ENSMUSG00000045031	Cetn4	centrin 4 [Source:MGI Symbol;Acc:MGI:2677454]	1808	150.428571428571	91.4	117.5	182.2	117.571428571428	7	5	10	5	7
ENSMUST00000102955.10	ENSMUSG00000045031	Cetn4	centrin 4 [Source:MGI Symbol;Acc:MGI:2677454]	1064	127.354838709677	132.137931034482	115.233333333333	130.083333333333	116.263157894736	31	29	30	12	19
ENSMUST00000140956.7	ENSMUSG00000045031	Cetn4	centrin 4 [Source:MGI Symbol;Acc:MGI:2677454]	2981	161.75	138.25	78.5	119.8	134	8	4	4	5	4
ENSMUST00000075537.6	ENSMUSG00000045031	Cetn4	centrin 4 [Source:MGI Symbol;Acc:MGI:2677454]	762	75.4285714285714	99.5	127	129.111111111111	142	7	10	7	9	6
ENSMUST00000125252.2	ENSMUSG00000045031	Cetn4	centrin 4 [Source:MGI Symbol;Acc:MGI:2677454]	592	NA	NA	69	NA	209	0	0	1	0	1
ENSMUST00000180502.7	ENSMUSG00000096916	Zfp850	zinc finger protein 850 [Source:MGI Symbol;Acc:MGI:3036281]	6163	174.307692307692	159.642857142857	183.75	154.875	153.384615384615	13	14	12	8	13
ENSMUST00000180024.1	ENSMUSG00000096916	Zfp850	zinc finger protein 850 [Source:MGI Symbol;Acc:MGI:3036281]	2070	NA	NA	NA	NA	NA	0	0	0	0	0
ENSMUST00000099111.3	ENSMUSG00000096916	Zfp850	zinc finger protein 850 [Source:MGI Symbol;Acc:MGI:3036281]	941	NA	NA	NA	NA	NA	0	0	0	0	0
ENSMUST00000044819.6	ENSMUSG00000098781	Gm28044	predicted gene, 28044 [Source:MGI Symbol;Acc:MGI:5547780]	551	NA	NA	NA	NA	NA	0	0	0	0	0
ENSMUST00000170543.1	ENSMUSG00000098781	Gm28044	predicted gene, 28044 [Source:MGI Symbol;Acc:MGI:5547780]	326	NA	NA	NA	NA	NA	0	0	0	0	0
ENSMUST00000182171.1	ENSMUSG00000035325	Sec31a	Sec31 homolog A (S. cerevisiae) [Source:MGI Symbol;Acc:MGI:1916412]	1931	NA	NA	NA	NA	NA	0	0	0	0	0
ENSMUST00000182144.1	ENSMUSG00000035325	Sec31a	Sec31 homolog A (S. cerevisiae) [Source:MGI Symbol;Acc:MGI:1916412]	756	NA	56	NA	NA	NA	0	1	0	0	0
ENSMUST00000182850.1	ENSMUSG00000035325	Sec31a	Sec31 homolog A (S. cerevisiae) [Source:MGI Symbol;Acc:MGI:1916412]	683	NA	NA	NA	NA	NA	0	0	0	0	0
ENSMUST00000183247.1	ENSMUSG00000035325	Sec31a	Sec31 homolog A (S. cerevisiae) [Source:MGI Symbol;Acc:MGI:1916412]	744	NA	NA	NA	NA	NA	0	0	0	0	0
ENSMUST00000182812.7	ENSMUSG00000035325	Sec31a	Sec31 homolog A (S. cerevisiae) [Source:MGI Symbol;Acc:MGI:1916412]	1093	NA	NA	NA	NA	NA	0	0	0	0	0
ENSMUST00000182002.1	ENSMUSG00000035325	Sec31a	Sec31 homolog A (S. cerevisiae) [Source:MGI Symbol;Acc:MGI:1916412]	887	NA	6	NA	NA	NA	0	1	0	0	0
ENSMUST00000182664.1	ENSMUSG00000035325	Sec31a	Sec31 homolog A (S. cerevisiae) [Source:MGI Symbol;Acc:MGI:1916412]	600	NA	NA	NA	NA	NA	0	0	0	0	0
ENSMUST00000182988.7	ENSMUSG00000035325	Sec31a	Sec31 homolog A (S. cerevisiae) [Source:MGI Symbol;Acc:MGI:1916412]	2846	NA	NA	NA	NA	NA	0	0	0	0	0
ENSMUST00000182569.1	ENSMUSG00000035325	Sec31a	Sec31 homolog A (S. cerevisiae) [Source:MGI Symbol;Acc:MGI:1916412]	1686	131	160.375	161.833333333333	123.125	135.222222222222	11	8	6	8	9
ENSMUST00000094578.10	ENSMUSG00000035325	Sec31a	Sec31 homolog A (S. cerevisiae) [Source:MGI Symbol;Acc:MGI:1916412]	4228	127.386075949367	146.165803108808	130.639639639639	124.290322580645	130.62937062937	158	193	111	124	143
ENSMUST00000182433.7	ENSMUSG00000035325	Sec31a	Sec31 homolog A (S. cerevisiae) [Source:MGI Symbol;Acc:MGI:1916412]	1195	165.68	162.222222222222	122.105263157894	143	119	25	18	19	8	20
ENSMUST00000182886.7	ENSMUSG00000035325	Sec31a	Sec31 homolog A (S. cerevisiae) [Source:MGI Symbol;Acc:MGI:1916412]	4047	130.884615384615	145.038461538461	119.818181818181	145.45	136.555555555555	26	26	22	20	27
ENSMUST00000232708.1	ENSMUSG00000042848	Vmn1r226	vomeronasal 1 receptor 226 [Source:MGI Symbol;Acc:MGI:2159616]	6084	NA	NA	141	NA	NA	0	0	1	0	0
ENSMUST00000233808.1	ENSMUSG00000042848	Vmn1r226	vomeronasal 1 receptor 226 [Source:MGI Symbol;Acc:MGI:2159616]	5807	NA	170	NA	NA	NA	0	1	0	0	0
ENSMUST00000232818.1	ENSMUSG00000042848	Vmn1r226	vomeronasal 1 receptor 226 [Source:MGI Symbol;Acc:MGI:2159616]	5878	NA	NA	NA	252	NA	0	0	0	1	0
ENSMUST00000233159.1	ENSMUSG00000042848	Vmn1r226	vomeronasal 1 receptor 226 [Source:MGI Symbol;Acc:MGI:2159616]	6078	NA	NA	NA	NA	NA	0	0	0	0	0
ENSMUST00000233959.1	ENSMUSG00000042848	Vmn1r226	vomeronasal 1 receptor 226 [Source:MGI Symbol;Acc:MGI:2159616]	5801	NA	NA	NA	190	NA	0	0	0	1	0
ENSMUST00000233722.1	ENSMUSG00000042848	Vmn1r226	vomeronasal 1 receptor 226 [Source:MGI Symbol;Acc:MGI:2159616]	5872	NA	NA	NA	NA	NA	0	0	0	0	0
ENSMUST00000061756.3	ENSMUSG00000042848	Vmn1r226	vomeronasal 1 receptor 226 [Source:MGI Symbol;Acc:MGI:2159616]	897	NA	NA	NA	NA	NA	0	0	0	0	0
ENSMUST00000153206.7	ENSMUSG00000081769	Gm12216	predicted gene 12216 [Source:MGI Symbol;Acc:MGI:3650088]	450	NA	309	NA	NA	NA	0	2	0	0	0
ENSMUST00000135815.7	ENSMUSG00000081769	Gm12216	predicted gene 12216 [Source:MGI Symbol;Acc:MGI:3650088]	298	NA	NA	NA	NA	NA	0	0	0	0	0
ENSMUST00000220191.1	ENSMUSG00000081769	Gm12216	predicted gene 12216 [Source:MGI Symbol;Acc:MGI:3650088]	1073	NA	NA	NA	NA	227	0	0	0	0	1
ENSMUST00000117316.7	ENSMUSG00000081769	Gm12216	predicted gene 12216 [Source:MGI Symbol;Acc:MGI:3650088]	1152	NA	NA	NA	NA	NA	0	0	0	0	0
ENSMUST00000126535.1	ENSMUSG00000081769	Gm12216	predicted gene 12216 [Source:MGI Symbol;Acc:MGI:3650088]	489	NA	NA	NA	162	NA	0	0	0	1	0
ENSMUST00000120776.7	ENSMUSG00000081769	Gm12216	predicted gene 12216 [Source:MGI Symbol;Acc:MGI:3650088]	826	NA	NA	NA	68	NA	0	0	0	1	0
ENSMUST00000121435.1	ENSMUSG00000081769	Gm12216	predicted gene 12216 [Source:MGI Symbol;Acc:MGI:3650088]	655	NA	NA	NA	NA	NA	0	0	0	0	0
ENSMUST00000032234.4	ENSMUSG00000008845	Cd163	CD163 antigen [Source:MGI Symbol;Acc:MGI:2135946]	4404	161.25	135.75	192	NA	NA	4	4	1	0	0
ENSMUST00000112541.7	ENSMUSG00000008845	Cd163	CD163 antigen [Source:MGI Symbol;Acc:MGI:2135946]	4443	123.75	NA	198	97	130	4	0	1	1	1
ENSMUST00000203210.1	ENSMUSG00000008845	Cd163	CD163 antigen [Source:MGI Symbol;Acc:MGI:2135946]	2779	NA	148	NA	148	166	0	2	0	1	1
ENSMUST00000025349.11	ENSMUSG00000024471	Myot	myotilin [Source:MGI Symbol;Acc:MGI:1889800]	2209	NA	NA	NA	NA	NA	0	0	0	0	0
ENSMUST00000115498.1	ENSMUSG00000024471	Myot	myotilin [Source:MGI Symbol;Acc:MGI:1889800]	2087	NA	NA	NA	NA	NA	0	0	0	0	0
ENSMUST00000029080.4	ENSMUSG00000027564	Cypt12	cysteine-rich perinuclear theca 12 [Source:MGI Symbol;Acc:MGI:1922689]	550	NA	NA	NA	NA	NA	0	0	0	0	0
ENSMUST00000077367.10	ENSMUSG00000028048	Gba	glucosidase, beta, acid [Source:MGI Symbol;Acc:MGI:95665]	1779	127.941176470588	135.811320754716	132.465116279069	108.615384615384	117.733333333333	34	53	43	26	45
ENSMUST00000197738.4	ENSMUSG00000028048	Gba	glucosidase, beta, acid [Source:MGI Symbol;Acc:MGI:95665]	1978	225.5	200	241.5	216	296.75	2	1	2	1	4
ENSMUST00000167998.1	ENSMUSG00000028048	Gba	glucosidase, beta, acid [Source:MGI Symbol;Acc:MGI:95665]	1938	123.666666666666	152.638888888888	119.37037037037	101.5625	153.208333333333	36	36	27	16	24
ENSMUST00000200124.1	ENSMUSG00000028048	Gba	glucosidase, beta, acid [Source:MGI Symbol;Acc:MGI:95665]	693	NA	NA	NA	NA	NA	0	0	0	0	0
ENSMUST00000196887.1	ENSMUSG00000028048	Gba	glucosidase, beta, acid [Source:MGI Symbol;Acc:MGI:95665]	662	169	111.428571428571	253.5	NA	117.714285714285	6	7	4	0	7
ENSMUST00000137627.1	ENSMUSG00000037606	Osbpl5	oxysterol binding protein-like 5 [Source:MGI Symbol;Acc:MGI:1930265]	1917	183.75	227	180.4	131	135.285714285714	8	5	5	5	14
ENSMUST00000119499.7	ENSMUSG00000037606	Osbpl5	oxysterol binding protein-like 5 [Source:MGI Symbol;Acc:MGI:1930265]	3775	139.777777777777	168.216216216216	149.193548387096	133.541666666666	196.558823529411	27	37	31	24	34
ENSMUST00000020411.13	ENSMUSG00000037606	Osbpl5	oxysterol binding protein-like 5 [Source:MGI Symbol;Acc:MGI:1930265]	3994	189.692307692307	160.36	170.428571428571	111.733333333333	141.117647058823	13	25	14	15	17
ENSMUST00000140502.1	ENSMUSG00000037606	Osbpl5	oxysterol binding protein-like 5 [Source:MGI Symbol;Acc:MGI:1930265]	399	NA	NA	NA	NA	NA	0	0	0	0	0
ENSMUST00000149736.1	ENSMUSG00000037606	Osbpl5	oxysterol binding protein-like 5 [Source:MGI Symbol;Acc:MGI:1930265]	626	NA	NA	NA	NA	NA	0	0	0	0	0
ENSMUST00000134056.1	ENSMUSG00000037606	Osbpl5	oxysterol binding protein-like 5 [Source:MGI Symbol;Acc:MGI:1930265]	634	NA	NA	NA	NA	NA	0	0	0	0	0
ENSMUST00000153864.1	ENSMUSG00000037606	Osbpl5	oxysterol binding protein-like 5 [Source:MGI Symbol;Acc:MGI:1930265]	700	NA	NA	NA	NA	NA	0	0	0	0	0
ENSMUST00000092096.13	ENSMUSG00000047879	Usp14	ubiquitin specific peptidase 14 [Source:MGI Symbol;Acc:MGI:1928898]	4726	151.940092165898	159.628117913832	150.503703703703	152.715753424657	153.520286396181	434	441	405	292	419
ENSMUST00000116669.1	ENSMUSG00000047879	Usp14	ubiquitin specific peptidase 14 [Source:MGI Symbol;Acc:MGI:1928898]	2019	132.386554621848	158.478632478632	146.205607476635	145.025316455696	147.939655172413	119	117	107	79	116
ENSMUST00000133594.1	ENSMUSG00000047879	Usp14	ubiquitin specific peptidase 14 [Source:MGI Symbol;Acc:MGI:1928898]	477	NA	NA	NA	NA	NA	0	0	0	0	0
ENSMUST00000154088.1	ENSMUSG00000047879	Usp14	ubiquitin specific peptidase 14 [Source:MGI Symbol;Acc:MGI:1928898]	989	NA	NA	NA	NA	NA	0	0	0	0	0
ENSMUST00000128334.7	ENSMUSG00000047879	Usp14	ubiquitin specific peptidase 14 [Source:MGI Symbol;Acc:MGI:1928898]	1346	NA	NA	NA	NA	NA	0	0	0	0	0
ENSMUST00000234165.1	ENSMUSG00000047879	Usp14	ubiquitin specific peptidase 14 [Source:MGI Symbol;Acc:MGI:1928898]	664	NA	NA	NA	NA	NA	0	0	0	0	0
ENSMUST00000145929.1	ENSMUSG00000047879	Usp14	ubiquitin specific peptidase 14 [Source:MGI Symbol;Acc:MGI:1928898]	656	NA	NA	NA	NA	NA	0	0	0	0	0
ENSMUST00000234243.1	ENSMUSG00000047879	Usp14	ubiquitin specific peptidase 14 [Source:MGI Symbol;Acc:MGI:1928898]	612	NA	NA	NA	NA	NA	0	0	0	0	0
ENSMUST00000142013.1	ENSMUSG00000047879	Usp14	ubiquitin specific peptidase 14 [Source:MGI Symbol;Acc:MGI:1928898]	1484	NA	153	NA	NA	NA	0	1	0	0	0
ENSMUST00000150321.1	ENSMUSG00000047879	Usp14	ubiquitin specific peptidase 14 [Source:MGI Symbol;Acc:MGI:1928898]	639	NA	NA	NA	NA	NA	0	0	0	0	0
ENSMUST00000216298.1	ENSMUSG00000059366	Olfr959	olfactory receptor 959 [Source:MGI Symbol;Acc:MGI:3030793]	5616	NA	NA	NA	NA	NA	0	0	0	0	0
ENSMUST00000215194.1	ENSMUSG00000059366	Olfr959	olfactory receptor 959 [Source:MGI Symbol;Acc:MGI:3030793]	4339	NA	NA	NA	NA	NA	0	0	0	0	0
ENSMUST00000079178.2	ENSMUSG00000059366	Olfr959	olfactory receptor 959 [Source:MGI Symbol;Acc:MGI:3030793]	1055	NA	NA	NA	NA	NA	0	0	0	0	0
ENSMUST00000163172.1	ENSMUSG00000090840	1700092M07Rik	RIKEN cDNA 1700092M07 gene [Source:MGI Symbol;Acc:MGI:1921557]	380	NA	NA	NA	NA	NA	0	0	0	0	0
ENSMUST00000187020.1	ENSMUSG00000090840	1700092M07Rik	RIKEN cDNA 1700092M07 gene [Source:MGI Symbol;Acc:MGI:1921557]	463	NA	NA	NA	NA	NA	0	0	0	0	0
ENSMUST00000161170.1	ENSMUSG00000072623	Zfp9	zinc finger protein 9 [Source:MGI Symbol;Acc:MGI:99210]	3968	191.788461538461	185.096153846153	162.217391304347	159.967741935483	156.307692307692	52	52	46	31	39
ENSMUST00000204066.1	ENSMUSG00000072623	Zfp9	zinc finger protein 9 [Source:MGI Symbol;Acc:MGI:99210]	1641	NA	NA	NA	NA	NA	0	0	0	0	0
ENSMUST00000137796.7	ENSMUSG00000037708	Spag6	sperm associated antigen 6 [Source:MGI Symbol;Acc:MGI:3040687]	723	NA	NA	NA	NA	NA	0	0	0	0	0
ENSMUST00000138017.1	ENSMUSG00000037708	Spag6	sperm associated antigen 6 [Source:MGI Symbol;Acc:MGI:3040687]	686	NA	NA	NA	NA	NA	0	0	0	0	0
ENSMUST00000095132.9	ENSMUSG00000037708	Spag6	sperm associated antigen 6 [Source:MGI Symbol;Acc:MGI:3040687]	2458	96	156.75	94.3333333333333	115.75	186.833333333333	5	4	6	4	6
ENSMUST00000173763.1	ENSMUSG00000037708	Spag6	sperm associated antigen 6 [Source:MGI Symbol;Acc:MGI:3040687]	626	NA	NA	NA	NA	NA	0	0	0	0	0
ENSMUST00000002808.6	ENSMUSG00000002731	Prkra	protein kinase, interferon inducible double stranded RNA dependent activator [Source:MGI Symbol;Acc:MGI:1344375]	1614	149.953125	144.337837837837	149	140.575	144.528301886792	64	74	42	40	53
ENSMUST00000140493.1	ENSMUSG00000002731	Prkra	protein kinase, interferon inducible double stranded RNA dependent activator [Source:MGI Symbol;Acc:MGI:1344375]	706	NA	NA	NA	NA	NA	0	0	0	0	0
ENSMUST00000221877.1	ENSMUSG00000036613	Eipr1	EARP complex and GARP complex interacting protein 1 [Source:MGI Symbol;Acc:MGI:1289332]	4091	142.675	138.763313609467	134.148760330578	131.6	141.25	120	169	121	90	132
ENSMUST00000222407.1	ENSMUSG00000036613	Eipr1	EARP complex and GARP complex interacting protein 1 [Source:MGI Symbol;Acc:MGI:1289332]	489	148	81	202	203	NA	6	1	1	1	0
ENSMUST00000035657.8	ENSMUSG00000036613	Eipr1	EARP complex and GARP complex interacting protein 1 [Source:MGI Symbol;Acc:MGI:1289332]	1747	143	160.192307692307	152	122.888888888888	155.451612903225	30	26	30	18	31
ENSMUST00000221555.1	ENSMUSG00000036613	Eipr1	EARP complex and GARP complex interacting protein 1 [Source:MGI Symbol;Acc:MGI:1289332]	620	NA	NA	NA	NA	NA	0	0	0	0	0
ENSMUST00000221574.1	ENSMUSG00000036613	Eipr1	EARP complex and GARP complex interacting protein 1 [Source:MGI Symbol;Acc:MGI:1289332]	753	NA	NA	NA	NA	NA	0	0	0	0	0
ENSMUST00000220878.1	ENSMUSG00000036613	Eipr1	EARP complex and GARP complex interacting protein 1 [Source:MGI Symbol;Acc:MGI:1289332]	927	256	244	NA	NA	306	2	1	0	0	1
ENSMUST00000220933.1	ENSMUSG00000036613	Eipr1	EARP complex and GARP complex interacting protein 1 [Source:MGI Symbol;Acc:MGI:1289332]	382	NA	NA	NA	NA	NA	0	0	0	0	0
ENSMUST00000044231.11	ENSMUSG00000061947	Serpina10	serine (or cysteine) peptidase inhibitor, clade A (alpha-1 antiproteinase, antitrypsin), member 10 [Source:MGI Symbol;Acc:MGI:2667725]	3498	NA	60	NA	NA	NA	0	1	0	0	0
ENSMUST00000121625.1	ENSMUSG00000061947	Serpina10	serine (or cysteine) peptidase inhibitor, clade A (alpha-1 antiproteinase, antitrypsin), member 10 [Source:MGI Symbol;Acc:MGI:2667725]	1424	NA	NA	NA	NA	NA	0	0	0	0	0
ENSMUST00000105473.2	ENSMUSG00000038602	Slc35f1	solute carrier family 35, member F1 [Source:MGI Symbol;Acc:MGI:2139810]	4941	133.133802816901	147.78102189781	134.869158878504	128.336842105263	128	142	137	107	95	117
ENSMUST00000108112.9	ENSMUSG00000027722	Spata5	spermatogenesis associated 5 [Source:MGI Symbol;Acc:MGI:1927170]	3295	173.857142857142	184	160.333333333333	145.75	133.875	7	5	6	8	8
ENSMUST00000029277.12	ENSMUSG00000027722	Spata5	spermatogenesis associated 5 [Source:MGI Symbol;Acc:MGI:1927170]	2890	204.25	134.5	178.333333333333	75	171	4	4	3	3	2
ENSMUST00000198968.1	ENSMUSG00000027722	Spata5	spermatogenesis associated 5 [Source:MGI Symbol;Acc:MGI:1927170]	2916	157.76923076923	141.785714285714	104.857142857142	153.666666666666	164.9	13	14	7	12	10
ENSMUST00000147687.7	ENSMUSG00000027722	Spata5	spermatogenesis associated 5 [Source:MGI Symbol;Acc:MGI:1927170]	404	NA	NA	NA	NA	NA	0	0	0	0	0
ENSMUST00000138225.1	ENSMUSG00000027722	Spata5	spermatogenesis associated 5 [Source:MGI Symbol;Acc:MGI:1927170]	370	NA	NA	NA	NA	NA	0	0	0	0	0
ENSMUST00000124347.1	ENSMUSG00000027722	Spata5	spermatogenesis associated 5 [Source:MGI Symbol;Acc:MGI:1927170]	599	NA	NA	NA	NA	NA	0	0	0	0	0
ENSMUST00000142199.1	ENSMUSG00000027722	Spata5	spermatogenesis associated 5 [Source:MGI Symbol;Acc:MGI:1927170]	371	NA	NA	NA	NA	NA	0	0	0	0	0
ENSMUST00000130674.1	ENSMUSG00000027722	Spata5	spermatogenesis associated 5 [Source:MGI Symbol;Acc:MGI:1927170]	592	NA	NA	NA	NA	NA	0	0	0	0	0
ENSMUST00000200093.1	ENSMUSG00000027722	Spata5	spermatogenesis associated 5 [Source:MGI Symbol;Acc:MGI:1927170]	482	NA	NA	NA	NA	NA	0	0	0	0	0
ENSMUST00000132958.2	ENSMUSG00000027722	Spata5	spermatogenesis associated 5 [Source:MGI Symbol;Acc:MGI:1927170]	379	NA	NA	NA	NA	NA	0	0	0	0	0
ENSMUST00000038389.14	ENSMUSG00000033498	Strc	stereocilin [Source:MGI Symbol;Acc:MGI:2153816]	5756	139	292	NA	NA	NA	2	1	0	0	0
ENSMUST00000129136.7	ENSMUSG00000033498	Strc	stereocilin [Source:MGI Symbol;Acc:MGI:2153816]	1059	NA	NA	NA	NA	NA	0	0	0	0	0
ENSMUST00000134443.7	ENSMUSG00000033498	Strc	stereocilin [Source:MGI Symbol;Acc:MGI:2153816]	566	NA	NA	NA	NA	NA	0	0	0	0	0
ENSMUST00000150332.1	ENSMUSG00000033498	Strc	stereocilin [Source:MGI Symbol;Acc:MGI:2153816]	468	NA	NA	NA	NA	NA	0	0	0	0	0
ENSMUST00000149219.1	ENSMUSG00000033498	Strc	stereocilin [Source:MGI Symbol;Acc:MGI:2153816]	2067	NA	NA	NA	166	NA	0	0	0	1	0
ENSMUST00000053024.7	ENSMUSG00000043445	Pgp	phosphoglycolate phosphatase [Source:MGI Symbol;Acc:MGI:1914328]	2627	119.847826086956	124.511173184357	122.383561643835	119.654166666666	127.108552631578	322	358	292	240	304
ENSMUST00000234216.1	ENSMUSG00000043445	Pgp	phosphoglycolate phosphatase [Source:MGI Symbol;Acc:MGI:1914328]	2428	118.266666666666	118.810344827586	122.568965517241	106	124.396551724137	60	58	58	35	58
ENSMUST00000153471.1	ENSMUSG00000075267	Pjvk	pejvakin [Source:MGI Symbol;Acc:MGI:2685847]	363	NA	NA	NA	NA	NA	0	0	0	0	0
ENSMUST00000144817.7	ENSMUSG00000075267	Pjvk	pejvakin [Source:MGI Symbol;Acc:MGI:2685847]	724	NA	NA	NA	NA	NA	0	0	0	0	0
ENSMUST00000099986.2	ENSMUSG00000075267	Pjvk	pejvakin [Source:MGI Symbol;Acc:MGI:2685847]	1219	NA	NA	268	NA	70	0	0	1	0	1
ENSMUST00000028340.3	ENSMUSG00000026963	Tmem210	transmembrane protein 210 [Source:MGI Symbol;Acc:MGI:1925467]	516	192	NA	189	NA	NA	1	0	1	0	0
ENSMUST00000144102.1	ENSMUSG00000026963	Tmem210	transmembrane protein 210 [Source:MGI Symbol;Acc:MGI:1925467]	326	206	NA	160	NA	NA	1	0	1	0	0
ENSMUST00000177638.1	ENSMUSG00000095061	E030018B13Rik	RIKEN cDNA E030018B13 gene [Source:MGI Symbol;Acc:MGI:2686543]	1015	NA	NA	NA	NA	NA	0	0	0	0	0
ENSMUST00000105137.3	ENSMUSG00000078346	H2al1n	H2A histone family member L1N [Source:MGI Symbol;Acc:MGI:3643774]	514	NA	NA	NA	NA	NA	0	0	0	0	0
ENSMUST00000162022.7	ENSMUSG00000052942	Glis3	GLIS family zinc finger 3 [Source:MGI Symbol;Acc:MGI:2444289]	7514	175.5	113	NA	142.833333333333	156.5	6	9	0	6	4
ENSMUST00000159520.7	ENSMUSG00000052942	Glis3	GLIS family zinc finger 3 [Source:MGI Symbol;Acc:MGI:2444289]	1569	NA	NA	NA	NA	NA	0	0	0	0	0
ENSMUST00000065113.13	ENSMUSG00000052942	Glis3	GLIS family zinc finger 3 [Source:MGI Symbol;Acc:MGI:2444289]	3382	NA	NA	NA	NA	NA	0	0	0	0	0
ENSMUST00000162873.7	ENSMUSG00000052942	Glis3	GLIS family zinc finger 3 [Source:MGI Symbol;Acc:MGI:2444289]	1323	NA	NA	NA	NA	NA	0	0	0	0	0
ENSMUST00000161026.1	ENSMUSG00000052942	Glis3	GLIS family zinc finger 3 [Source:MGI Symbol;Acc:MGI:2444289]	2438	NA	NA	NA	NA	NA	0	0	0	0	0
ENSMUST00000159639.1	ENSMUSG00000052942	Glis3	GLIS family zinc finger 3 [Source:MGI Symbol;Acc:MGI:2444289]	349	NA	NA	NA	NA	NA	0	0	0	0	0
ENSMUST00000112612.8	ENSMUSG00000052942	Glis3	GLIS family zinc finger 3 [Source:MGI Symbol;Acc:MGI:2444289]	3016	NA	NA	NA	NA	NA	0	0	0	0	0
ENSMUST00000159178.1	ENSMUSG00000052942	Glis3	GLIS family zinc finger 3 [Source:MGI Symbol;Acc:MGI:2444289]	1281	NA	NA	NA	NA	NA	0	0	0	0	0
ENSMUST00000160376.7	ENSMUSG00000052942	Glis3	GLIS family zinc finger 3 [Source:MGI Symbol;Acc:MGI:2444289]	740	NA	NA	NA	NA	NA	0	0	0	0	0
ENSMUST00000161328.7	ENSMUSG00000052942	Glis3	GLIS family zinc finger 3 [Source:MGI Symbol;Acc:MGI:2444289]	948	NA	NA	NA	NA	NA	0	0	0	0	0
ENSMUST00000063694.9	ENSMUSG00000052040	Klf13	Kruppel-like factor 13 [Source:MGI Symbol;Acc:MGI:1354948]	6396	166.772020725388	158.655172413793	156.258064516129	144.093220338983	164.714285714285	193	145	155	118	154
ENSMUST00000185175.1	ENSMUSG00000052040	Klf13	Kruppel-like factor 13 [Source:MGI Symbol;Acc:MGI:1354948]	487	NA	NA	NA	NA	NA	0	0	0	0	0
ENSMUST00000183817.1	ENSMUSG00000052040	Klf13	Kruppel-like factor 13 [Source:MGI Symbol;Acc:MGI:1354948]	599	NA	NA	NA	NA	NA	0	0	0	0	0
ENSMUST00000183907.1	ENSMUSG00000052040	Klf13	Kruppel-like factor 13 [Source:MGI Symbol;Acc:MGI:1354948]	934	NA	NA	NA	NA	NA	0	0	0	0	0
ENSMUST00000053713.4	ENSMUSG00000044030	Irf2bp1	interferon regulatory factor 2 binding protein 1 [Source:MGI Symbol;Acc:MGI:2442159]	2734	121.350785340314	121.560975609756	127.913907284768	108.445205479452	128.1015625	191	164	151	146	128
ENSMUST00000140742.1	ENSMUSG00000030409	Dmpk	dystrophia myotonica-protein kinase [Source:MGI Symbol;Acc:MGI:94906]	592	NA	NA	NA	NA	NA	0	0	0	0	0
ENSMUST00000148380.1	ENSMUSG00000030409	Dmpk	dystrophia myotonica-protein kinase [Source:MGI Symbol;Acc:MGI:94906]	663	NA	NA	NA	NA	NA	0	0	0	0	0
ENSMUST00000126264.1	ENSMUSG00000030409	Dmpk	dystrophia myotonica-protein kinase [Source:MGI Symbol;Acc:MGI:94906]	851	NA	NA	NA	NA	NA	0	0	0	0	0
ENSMUST00000132115.7	ENSMUSG00000030409	Dmpk	dystrophia myotonica-protein kinase [Source:MGI Symbol;Acc:MGI:94906]	757	NA	NA	NA	NA	NA	0	0	0	0	0
ENSMUST00000143938.1	ENSMUSG00000030409	Dmpk	dystrophia myotonica-protein kinase [Source:MGI Symbol;Acc:MGI:94906]	785	NA	NA	NA	NA	NA	0	0	0	0	0
ENSMUST00000148472.1	ENSMUSG00000030409	Dmpk	dystrophia myotonica-protein kinase [Source:MGI Symbol;Acc:MGI:94906]	967	NA	NA	NA	NA	NA	0	0	0	0	0
ENSMUST00000032568.13	ENSMUSG00000030409	Dmpk	dystrophia myotonica-protein kinase [Source:MGI Symbol;Acc:MGI:94906]	2761	167.181818181818	143.153846153846	159.166666666666	164	170.666666666666	11	13	6	4	6
ENSMUST00000122999.7	ENSMUSG00000030409	Dmpk	dystrophia myotonica-protein kinase [Source:MGI Symbol;Acc:MGI:94906]	544	NA	NA	NA	NA	NA	0	0	0	0	0
ENSMUST00000154199.7	ENSMUSG00000030409	Dmpk	dystrophia myotonica-protein kinase [Source:MGI Symbol;Acc:MGI:94906]	2850	221.166666666666	221.2	277	163.5	223	6	5	1	2	4
ENSMUST00000108473.9	ENSMUSG00000030409	Dmpk	dystrophia myotonica-protein kinase [Source:MGI Symbol;Acc:MGI:94906]	2588	57	NA	NA	197	NA	2	0	0	2	0
ENSMUST00000108474.1	ENSMUSG00000030409	Dmpk	dystrophia myotonica-protein kinase [Source:MGI Symbol;Acc:MGI:94906]	2591	267.6	247.2	NA	304.5	NA	5	5	0	2	0
ENSMUST00000238982.1	ENSMUSG00000030409	Dmpk	dystrophia myotonica-protein kinase [Source:MGI Symbol;Acc:MGI:94906]	2227	NA	NA	NA	NA	NA	0	0	0	0	0
ENSMUST00000149188.7	ENSMUSG00000030409	Dmpk	dystrophia myotonica-protein kinase [Source:MGI Symbol;Acc:MGI:94906]	923	NA	NA	NA	NA	NA	0	0	0	0	0
ENSMUST00000142725.7	ENSMUSG00000030409	Dmpk	dystrophia myotonica-protein kinase [Source:MGI Symbol;Acc:MGI:94906]	2135	205.666666666666	82.3333333333333	NA	NA	271	3	3	0	0	1
ENSMUST00000137219.7	ENSMUSG00000030409	Dmpk	dystrophia myotonica-protein kinase [Source:MGI Symbol;Acc:MGI:94906]	2433	283.25	278.4	221.5	305	272.6	8	5	2	1	5
ENSMUST00000135839.7	ENSMUSG00000030409	Dmpk	dystrophia myotonica-protein kinase [Source:MGI Symbol;Acc:MGI:94906]	2475	225.2	249.625	NA	321.75	287.75	5	8	0	4	4
ENSMUST00000147215.7	ENSMUSG00000030409	Dmpk	dystrophia myotonica-protein kinase [Source:MGI Symbol;Acc:MGI:94906]	743	NA	NA	NA	NA	NA	0	0	0	0	0
ENSMUST00000152050.1	ENSMUSG00000030409	Dmpk	dystrophia myotonica-protein kinase [Source:MGI Symbol;Acc:MGI:94906]	565	NA	NA	NA	NA	NA	0	0	0	0	0
ENSMUST00000128422.7	ENSMUSG00000030409	Dmpk	dystrophia myotonica-protein kinase [Source:MGI Symbol;Acc:MGI:94906]	650	NA	NA	NA	NA	NA	0	0	0	0	0
ENSMUST00000070340.5	ENSMUSG00000049184	Purg	purine-rich element binding protein G [Source:MGI Symbol;Acc:MGI:1922279]	1064	NA	NA	NA	NA	NA	0	0	0	0	0
ENSMUST00000078058.4	ENSMUSG00000049184	Purg	purine-rich element binding protein G [Source:MGI Symbol;Acc:MGI:1922279]	1795	180.352112676056	169.674418604651	152.828125	180.883720930232	182.537313432835	71	43	64	43	67
ENSMUST00000144602.1	ENSMUSG00000026156	B3gat2	beta-1,3-glucuronyltransferase 2 (glucuronosyltransferase S) [Source:MGI Symbol;Acc:MGI:2389490]	1488	105	161	NA	NA	NA	1	1	0	0	0
ENSMUST00000063663.5	ENSMUSG00000026156	B3gat2	beta-1,3-glucuronyltransferase 2 (glucuronosyltransferase S) [Source:MGI Symbol;Acc:MGI:2389490]	5655	131.22619047619	124.743902439024	132.4125	150.978260869565	139.024390243902	84	82	80	46	82
ENSMUST00000140583.1	ENSMUSG00000026156	B3gat2	beta-1,3-glucuronyltransferase 2 (glucuronosyltransferase S) [Source:MGI Symbol;Acc:MGI:2389490]	1737	220	NA	243	NA	111	1	0	2	0	1
ENSMUST00000042780.13	ENSMUSG00000040548	Tex2	testis expressed gene 2 [Source:MGI Symbol;Acc:MGI:102465]	4934	163.894736842105	141.55905511811	140.728155339805	133.866666666666	147.51923076923	133	127	103	75	104
ENSMUST00000207249.1	ENSMUSG00000040548	Tex2	testis expressed gene 2 [Source:MGI Symbol;Acc:MGI:102465]	3092	152.666666666666	154	141.8	138.333333333333	168	6	7	10	6	4
ENSMUST00000103070.2	ENSMUSG00000040548	Tex2	testis expressed gene 2 [Source:MGI Symbol;Acc:MGI:102465]	2645	NA	NA	NA	NA	NA	0	0	0	0	0
ENSMUST00000128933.1	ENSMUSG00000040548	Tex2	testis expressed gene 2 [Source:MGI Symbol;Acc:MGI:102465]	739	NA	NA	NA	NA	NA	0	0	0	0	0
ENSMUST00000153870.1	ENSMUSG00000040548	Tex2	testis expressed gene 2 [Source:MGI Symbol;Acc:MGI:102465]	464	NA	NA	NA	NA	NA	0	0	0	0	0
ENSMUST00000159417.1	ENSMUSG00000026344	Lypd1	Ly6/Plaur domain containing 1 [Source:MGI Symbol;Acc:MGI:1919835]	6464	112.965367965367	120.564784053156	116.349019607843	123.138554216867	116.848958333333	231	301	255	166	192
ENSMUST00000162899.7	ENSMUSG00000026344	Lypd1	Ly6/Plaur domain containing 1 [Source:MGI Symbol;Acc:MGI:1919835]	1511	103.142857142857	97.5	102.75	92.2	116.5	7	6	12	10	10
ENSMUST00000027582.9	ENSMUSG00000026344	Lypd1	Ly6/Plaur domain containing 1 [Source:MGI Symbol;Acc:MGI:1919835]	1447	NA	177	116.5	108	107	0	1	2	1	1
ENSMUST00000159529.1	ENSMUSG00000026344	Lypd1	Ly6/Plaur domain containing 1 [Source:MGI Symbol;Acc:MGI:1919835]	989	NA	NA	NA	192	NA	0	0	0	1	0
ENSMUST00000161361.2	ENSMUSG00000026344	Lypd1	Ly6/Plaur domain containing 1 [Source:MGI Symbol;Acc:MGI:1919835]	245	NA	NA	NA	NA	NA	0	0	0	0	0
ENSMUST00000200387.1	ENSMUSG00000028100	Nudt17	nudix (nucleoside diphosphate linked moiety X)-type motif 17 [Source:MGI Symbol;Acc:MGI:1925623]	2108	217.5	95	NA	NA	359	2	1	0	0	1
ENSMUST00000196773.1	ENSMUSG00000028100	Nudt17	nudix (nucleoside diphosphate linked moiety X)-type motif 17 [Source:MGI Symbol;Acc:MGI:1925623]	671	NA	NA	49	145	86	0	0	1	2	1
ENSMUST00000171249.5	ENSMUSG00000028100	Nudt17	nudix (nucleoside diphosphate linked moiety X)-type motif 17 [Source:MGI Symbol;Acc:MGI:1925623]	1110	155.272727272727	114.333333333333	119.375	152.5	137.222222222222	11	6	8	6	9
ENSMUST00000029742.8	ENSMUSG00000028100	Nudt17	nudix (nucleoside diphosphate linked moiety X)-type motif 17 [Source:MGI Symbol;Acc:MGI:1925623]	1039	35	137.666666666666	201.75	149.5	99.5	1	3	4	2	2
ENSMUST00000004206.9	ENSMUSG00000070319	Eif3g	eukaryotic translation initiation factor 3, subunit G [Source:MGI Symbol;Acc:MGI:1858258]	1101	111.238805970149	119.554252199413	111.655976676384	109.955555555555	109.721556886227	268	341	343	225	334
ENSMUST00000213454.1	ENSMUSG00000070319	Eif3g	eukaryotic translation initiation factor 3, subunit G [Source:MGI Symbol;Acc:MGI:1858258]	766	NA	NA	NA	NA	NA	0	0	0	0	0
ENSMUST00000213882.1	ENSMUSG00000070319	Eif3g	eukaryotic translation initiation factor 3, subunit G [Source:MGI Symbol;Acc:MGI:1858258]	802	NA	NA	NA	NA	NA	0	0	0	0	0
ENSMUST00000216133.1	ENSMUSG00000070319	Eif3g	eukaryotic translation initiation factor 3, subunit G [Source:MGI Symbol;Acc:MGI:1858258]	729	NA	NA	NA	NA	NA	0	0	0	0	0
ENSMUST00000233597.1	ENSMUSG00000067951	Vmn1r227	vomeronasal 1 receptor 227 [Source:MGI Symbol;Acc:MGI:2159627]	4406	NA	NA	NA	NA	NA	0	0	0	0	0
ENSMUST00000232943.1	ENSMUSG00000067951	Vmn1r227	vomeronasal 1 receptor 227 [Source:MGI Symbol;Acc:MGI:2159627]	4646	NA	130	NA	NA	185	0	1	0	0	1
ENSMUST00000179914.2	ENSMUSG00000067951	Vmn1r227	vomeronasal 1 receptor 227 [Source:MGI Symbol;Acc:MGI:2159627]	4356	NA	NA	NA	NA	NA	0	0	0	0	0
ENSMUST00000232844.1	ENSMUSG00000067951	Vmn1r227	vomeronasal 1 receptor 227 [Source:MGI Symbol;Acc:MGI:2159627]	2456	NA	107	NA	NA	NA	0	1	0	0	0
ENSMUST00000088829.4	ENSMUSG00000067951	Vmn1r227	vomeronasal 1 receptor 227 [Source:MGI Symbol;Acc:MGI:2159627]	6616	NA	191.666666666666	393	NA	NA	0	3	1	0	0
ENSMUST00000067664.9	ENSMUSG00000020849	Ywhae	tyrosine 3-monooxygenase/tryptophan 5-monooxygenase activation protein, epsilon polypeptide [Source:MGI Symbol;Acc:MGI:894689]	2100	127.534729493891	130.334098360655	127.376879026485	124.208682008368	127.331417624521	2865	3050	2794	1912	2610
ENSMUST00000134745.7	ENSMUSG00000020849	Ywhae	tyrosine 3-monooxygenase/tryptophan 5-monooxygenase activation protein, epsilon polypeptide [Source:MGI Symbol;Acc:MGI:894689]	599	NA	NA	NA	NA	NA	0	0	0	0	0
ENSMUST00000153038.7	ENSMUSG00000020849	Ywhae	tyrosine 3-monooxygenase/tryptophan 5-monooxygenase activation protein, epsilon polypeptide [Source:MGI Symbol;Acc:MGI:894689]	738	91	NA	NA	NA	NA	1	0	0	0	0
ENSMUST00000131398.1	ENSMUSG00000020849	Ywhae	tyrosine 3-monooxygenase/tryptophan 5-monooxygenase activation protein, epsilon polypeptide [Source:MGI Symbol;Acc:MGI:894689]	461	NA	NA	NA	NA	NA	0	0	0	0	0
ENSMUST00000155057.1	ENSMUSG00000020849	Ywhae	tyrosine 3-monooxygenase/tryptophan 5-monooxygenase activation protein, epsilon polypeptide [Source:MGI Symbol;Acc:MGI:894689]	815	NA	NA	NA	NA	NA	0	0	0	0	0
ENSMUST00000204653.2	ENSMUSG00000030057	Cnbp	cellular nucleic acid binding protein [Source:MGI Symbol;Acc:MGI:88431]	2175	148.021008403361	151.499040307101	139.926267281106	142.514666666666	149.158129175946	476	521	434	375	449
ENSMUST00000204890.2	ENSMUSG00000030057	Cnbp	cellular nucleic acid binding protein [Source:MGI Symbol;Acc:MGI:88431]	1614	139.38596491228	154.117647058823	155.405797101449	156.727272727272	137.725490196078	57	68	69	44	51
ENSMUST00000113619.7	ENSMUSG00000030057	Cnbp	cellular nucleic acid binding protein [Source:MGI Symbol;Acc:MGI:88431]	1661	143.997448979591	147.11622276029	148.646900269541	147.829596412556	148.997275204359	392	413	371	223	367
ENSMUST00000113617.2	ENSMUSG00000030057	Cnbp	cellular nucleic acid binding protein [Source:MGI Symbol;Acc:MGI:88431]	952	NA	NA	NA	NA	NA	0	0	0	0	0
ENSMUST00000141961.3	ENSMUSG00000030057	Cnbp	cellular nucleic acid binding protein [Source:MGI Symbol;Acc:MGI:88431]	915	NA	NA	2	NA	NA	0	0	1	0	0
ENSMUST00000204596.1	ENSMUSG00000030057	Cnbp	cellular nucleic acid binding protein [Source:MGI Symbol;Acc:MGI:88431]	911	NA	NA	NA	NA	NA	0	0	0	0	0
ENSMUST00000134851.2	ENSMUSG00000030057	Cnbp	cellular nucleic acid binding protein [Source:MGI Symbol;Acc:MGI:88431]	985	NA	NA	NA	NA	NA	0	0	0	0	0
ENSMUST00000204104.1	ENSMUSG00000030057	Cnbp	cellular nucleic acid binding protein [Source:MGI Symbol;Acc:MGI:88431]	690	NA	NA	NA	NA	NA	0	0	0	0	0
ENSMUST00000032138.14	ENSMUSG00000030057	Cnbp	cellular nucleic acid binding protein [Source:MGI Symbol;Acc:MGI:88431]	2178	151.578512396694	156.068273092369	151.916666666666	140.692307692307	154.330578512396	242	249	216	156	242
ENSMUST00000149737.7	ENSMUSG00000026155	Smap1	small ArfGAP 1 [Source:MGI Symbol;Acc:MGI:2138261]	1864	NA	NA	84.5	179	211	0	0	2	1	2
ENSMUST00000027339.13	ENSMUSG00000026155	Smap1	small ArfGAP 1 [Source:MGI Symbol;Acc:MGI:2138261]	2289	134.884236453201	136.815217391304	136.769736842105	131.4	141.620938628158	406	368	304	210	277
ENSMUST00000136506.1	ENSMUSG00000026155	Smap1	small ArfGAP 1 [Source:MGI Symbol;Acc:MGI:2138261]	445	NA	NA	NA	NA	NA	0	0	0	0	0
ENSMUST00000129254.7	ENSMUSG00000026155	Smap1	small ArfGAP 1 [Source:MGI Symbol;Acc:MGI:2138261]	1365	NA	NA	NA	NA	NA	0	0	0	0	0
ENSMUST00000148710.7	ENSMUSG00000026155	Smap1	small ArfGAP 1 [Source:MGI Symbol;Acc:MGI:2138261]	809	NA	NA	NA	NA	NA	0	0	0	0	0
ENSMUST00000141330.7	ENSMUSG00000026155	Smap1	small ArfGAP 1 [Source:MGI Symbol;Acc:MGI:2138261]	923	NA	NA	18	NA	23	0	0	1	0	1
ENSMUST00000133398.1	ENSMUSG00000026155	Smap1	small ArfGAP 1 [Source:MGI Symbol;Acc:MGI:2138261]	1271	74	15	90	NA	244	1	1	1	0	1
ENSMUST00000027581.6	ENSMUSG00000026343	Gpr39	G protein-coupled receptor 39 [Source:MGI Symbol;Acc:MGI:1918361]	2691	79	NA	144	45	NA	1	0	1	1	0
ENSMUST00000159359.1	ENSMUSG00000026343	Gpr39	G protein-coupled receptor 39 [Source:MGI Symbol;Acc:MGI:1918361]	1128	NA	NA	NA	NA	105	0	0	0	0	1
ENSMUST00000233605.1	ENSMUSG00000060245	Vmn1r228	vomeronasal 1 receptor 228 [Source:MGI Symbol;Acc:MGI:2159624]	3740	NA	NA	NA	NA	NA	0	0	0	0	0
ENSMUST00000232812.1	ENSMUSG00000060245	Vmn1r228	vomeronasal 1 receptor 228 [Source:MGI Symbol;Acc:MGI:2159624]	3717	NA	NA	NA	NA	NA	0	0	0	0	0
ENSMUST00000233186.1	ENSMUSG00000060245	Vmn1r228	vomeronasal 1 receptor 228 [Source:MGI Symbol;Acc:MGI:2159624]	3786	NA	NA	NA	NA	NA	0	0	0	0	0
ENSMUST00000233164.1	ENSMUSG00000060245	Vmn1r228	vomeronasal 1 receptor 228 [Source:MGI Symbol;Acc:MGI:2159624]	3763	NA	NA	NA	NA	NA	0	0	0	0	0
ENSMUST00000072410.4	ENSMUSG00000060245	Vmn1r228	vomeronasal 1 receptor 228 [Source:MGI Symbol;Acc:MGI:2159624]	1443	NA	NA	NA	NA	NA	0	0	0	0	0
ENSMUST00000064462.4	ENSMUSG00000001076	C1ql4	complement component 1, q subcomponent-like 4 [Source:MGI Symbol;Acc:MGI:3579909]	1474	NA	NA	NA	NA	NA	0	0	0	0	0
ENSMUST00000076084.5	ENSMUSG00000027317	Ppp1r14d	protein phosphatase 1, regulatory inhibitor subunit 14D [Source:MGI Symbol;Acc:MGI:1919362]	787	NA	NA	132	NA	NA	0	0	1	0	0
ENSMUST00000110820.2	ENSMUSG00000027317	Ppp1r14d	protein phosphatase 1, regulatory inhibitor subunit 14D [Source:MGI Symbol;Acc:MGI:1919362]	790	NA	NA	NA	NA	NA	0	0	0	0	0
ENSMUST00000021495.3	ENSMUSG00000041550	Serpina5	serine (or cysteine) peptidase inhibitor, clade A, member 5 [Source:MGI Symbol;Acc:MGI:107817]	2162	NA	NA	NA	NA	NA	0	0	0	0	0
ENSMUST00000200351.1	ENSMUSG00000037400	Atp11b	ATPase, class VI, type 11B [Source:MGI Symbol;Acc:MGI:1923545]	1906	NA	NA	NA	NA	218	0	0	0	0	1
ENSMUST00000200445.4	ENSMUSG00000037400	Atp11b	ATPase, class VI, type 11B [Source:MGI Symbol;Acc:MGI:1923545]	3028	39	NA	165	93	NA	3	0	2	2	0
ENSMUST00000196700.4	ENSMUSG00000037400	Atp11b	ATPase, class VI, type 11B [Source:MGI Symbol;Acc:MGI:1923545]	6322	336.636363636363	334.214285714285	311.545454545454	315.071428571428	354.227272727272	33	28	22	14	22
ENSMUST00000029257.14	ENSMUSG00000037400	Atp11b	ATPase, class VI, type 11B [Source:MGI Symbol;Acc:MGI:1923545]	4868	239.756756756756	241.921052631578	221.179487179487	198.95	236.642857142857	37	38	39	20	28
ENSMUST00000199892.4	ENSMUSG00000037400	Atp11b	ATPase, class VI, type 11B [Source:MGI Symbol;Acc:MGI:1923545]	776	NA	NA	NA	NA	NA	0	0	0	0	0
ENSMUST00000198599.1	ENSMUSG00000037400	Atp11b	ATPase, class VI, type 11B [Source:MGI Symbol;Acc:MGI:1923545]	4102	247.15	250.047619047619	267.916666666666	198.4	236.333333333333	20	21	12	5	15
ENSMUST00000196965.1	ENSMUSG00000037400	Atp11b	ATPase, class VI, type 11B [Source:MGI Symbol;Acc:MGI:1923545]	648	NA	NA	NA	NA	NA	0	0	0	0	0
ENSMUST00000197003.1	ENSMUSG00000037400	Atp11b	ATPase, class VI, type 11B [Source:MGI Symbol;Acc:MGI:1923545]	638	NA	NA	NA	NA	NA	0	0	0	0	0
ENSMUST00000196409.1	ENSMUSG00000037400	Atp11b	ATPase, class VI, type 11B [Source:MGI Symbol;Acc:MGI:1923545]	1918	280.521739130434	306.545454545454	252.833333333333	258.416666666666	224.5	23	22	12	12	12
ENSMUST00000211902.1	ENSMUSG00000037400	Atp11b	ATPase, class VI, type 11B [Source:MGI Symbol;Acc:MGI:1923545]	509	697	NA	NA	NA	NA	1	0	0	0	0
ENSMUST00000197764.1	ENSMUSG00000037400	Atp11b	ATPase, class VI, type 11B [Source:MGI Symbol;Acc:MGI:1923545]	621	NA	NA	NA	NA	NA	0	0	0	0	0
ENSMUST00000142800.1	ENSMUSG00000018398	39692	septin 8 [Source:MGI Symbol;Acc:MGI:894310]	500	NA	NA	NA	NA	136	0	0	0	0	1
ENSMUST00000108987.7	ENSMUSG00000018398	39692	septin 8 [Source:MGI Symbol;Acc:MGI:894310]	4436	150.093023255813	156.627450980392	145.536585365853	112.621621621621	169.980769230769	43	51	41	37	52
ENSMUST00000121334.7	ENSMUSG00000018398	39692	septin 8 [Source:MGI Symbol;Acc:MGI:894310]	2801	155.884726224783	156.868357487922	155.880794701986	151.883239171374	161.213498622589	694	828	755	531	726
ENSMUST00000117061.7	ENSMUSG00000018398	39692	septin 8 [Source:MGI Symbol;Acc:MGI:894310]	4563	199.318181818181	200.214285714285	190	186.125	148.947368421052	22	28	23	16	19
ENSMUST00000120878.8	ENSMUSG00000018398	39692	septin 8 [Source:MGI Symbol;Acc:MGI:894310]	1806	119.426229508196	127.35	137.5625	113.117647058823	131.962264150943	61	80	48	51	53
ENSMUST00000147912.1	ENSMUSG00000018398	39692	septin 8 [Source:MGI Symbol;Acc:MGI:894310]	1742	NA	NA	NA	122	92	0	0	0	1	1
ENSMUST00000145927.1	ENSMUSG00000018398	39692	septin 8 [Source:MGI Symbol;Acc:MGI:894310]	737	NA	NA	NA	NA	NA	0	0	0	0	0
ENSMUST00000109424.3	ENSMUSG00000022382	Wnt7b	wingless-type MMTV integration site family, member 7B [Source:MGI Symbol;Acc:MGI:98962]	3134	106.975	126.676470588235	112.717948717948	114.916666666666	107.974358974358	40	34	39	24	39
ENSMUST00000023015.14	ENSMUSG00000022382	Wnt7b	wingless-type MMTV integration site family, member 7B [Source:MGI Symbol;Acc:MGI:98962]	3365	108.162162162162	112.535714285714	124.029411764705	104.84	98.2727272727272	37	28	34	25	22
ENSMUST00000229495.1	ENSMUSG00000022382	Wnt7b	wingless-type MMTV integration site family, member 7B [Source:MGI Symbol;Acc:MGI:98962]	3125	120.689655172413	118.235294117647	123.136363636363	91.4705882352941	128.666666666666	29	17	22	17	24
ENSMUST00000167968.8	ENSMUSG00000022382	Wnt7b	wingless-type MMTV integration site family, member 7B [Source:MGI Symbol;Acc:MGI:98962]	3400	120	160.375	154.6	145.666666666666	104	1	8	5	3	3
ENSMUST00000229191.1	ENSMUSG00000022382	Wnt7b	wingless-type MMTV integration site family, member 7B [Source:MGI Symbol;Acc:MGI:98962]	2521	308	83	151	NA	23	1	1	1	0	1
ENSMUST00000230299.1	ENSMUSG00000022382	Wnt7b	wingless-type MMTV integration site family, member 7B [Source:MGI Symbol;Acc:MGI:98962]	404	NA	NA	NA	NA	NA	0	0	0	0	0
ENSMUST00000022725.3	ENSMUSG00000022129	Dct	dopachrome tautomerase [Source:MGI Symbol;Acc:MGI:102563]	2202	128	NA	144	228	85	2	0	2	1	4
ENSMUST00000228925.1	ENSMUSG00000022129	Dct	dopachrome tautomerase [Source:MGI Symbol;Acc:MGI:102563]	3459	48	64	65	NA	NA	1	1	1	0	0
ENSMUST00000228548.1	ENSMUSG00000022129	Dct	dopachrome tautomerase [Source:MGI Symbol;Acc:MGI:102563]	1868	NA	NA	NA	NA	NA	0	0	0	0	0
ENSMUST00000227850.1	ENSMUSG00000022129	Dct	dopachrome tautomerase [Source:MGI Symbol;Acc:MGI:102563]	565	NA	NA	NA	NA	NA	0	0	0	0	0
ENSMUST00000044565.14	ENSMUSG00000040690	Col16a1	collagen, type XVI, alpha 1 [Source:MGI Symbol;Acc:MGI:1095396]	5206	313.5	211	NA	94	200.5	2	2	0	3	2
ENSMUST00000132251.1	ENSMUSG00000040690	Col16a1	collagen, type XVI, alpha 1 [Source:MGI Symbol;Acc:MGI:1095396]	410	NA	NA	NA	NA	NA	0	0	0	0	0
ENSMUST00000097867.8	ENSMUSG00000040690	Col16a1	collagen, type XVI, alpha 1 [Source:MGI Symbol;Acc:MGI:1095396]	4574	NA	NA	NA	NA	NA	0	0	0	0	0
ENSMUST00000106001.7	ENSMUSG00000040690	Col16a1	collagen, type XVI, alpha 1 [Source:MGI Symbol;Acc:MGI:1095396]	3519	NA	NA	NA	NA	NA	0	0	0	0	0
ENSMUST00000142293.7	ENSMUSG00000040690	Col16a1	collagen, type XVI, alpha 1 [Source:MGI Symbol;Acc:MGI:1095396]	383	NA	NA	NA	NA	NA	0	0	0	0	0
ENSMUST00000143432.7	ENSMUSG00000040690	Col16a1	collagen, type XVI, alpha 1 [Source:MGI Symbol;Acc:MGI:1095396]	5138	224.333333333333	123	227	73	177.5	3	5	1	2	2
ENSMUST00000123617.7	ENSMUSG00000040690	Col16a1	collagen, type XVI, alpha 1 [Source:MGI Symbol;Acc:MGI:1095396]	452	NA	NA	NA	NA	NA	0	0	0	0	0
ENSMUST00000154441.1	ENSMUSG00000040690	Col16a1	collagen, type XVI, alpha 1 [Source:MGI Symbol;Acc:MGI:1095396]	477	NA	NA	NA	NA	NA	0	0	0	0	0
ENSMUST00000143577.1	ENSMUSG00000040690	Col16a1	collagen, type XVI, alpha 1 [Source:MGI Symbol;Acc:MGI:1095396]	4037	149.666666666666	215	181.333333333333	260.5	232.75	3	5	3	2	4
ENSMUST00000146606.7	ENSMUSG00000040690	Col16a1	collagen, type XVI, alpha 1 [Source:MGI Symbol;Acc:MGI:1095396]	717	NA	NA	NA	NA	NA	0	0	0	0	0
ENSMUST00000151541.7	ENSMUSG00000040690	Col16a1	collagen, type XVI, alpha 1 [Source:MGI Symbol;Acc:MGI:1095396]	322	NA	NA	NA	NA	NA	0	0	0	0	0
ENSMUST00000129937.1	ENSMUSG00000040690	Col16a1	collagen, type XVI, alpha 1 [Source:MGI Symbol;Acc:MGI:1095396]	445	NA	NA	NA	NA	NA	0	0	0	0	0
ENSMUST00000135675.1	ENSMUSG00000040690	Col16a1	collagen, type XVI, alpha 1 [Source:MGI Symbol;Acc:MGI:1095396]	833	NA	201	NA	NA	NA	0	1	0	0	0
ENSMUST00000031181.15	ENSMUSG00000029260	Ugt2b34	UDP glucuronosyltransferase 2 family, polypeptide B34 [Source:MGI Symbol;Acc:MGI:2140962]	3051	NA	NA	NA	NA	NA	0	0	0	0	0
ENSMUST00000113333.1	ENSMUSG00000029260	Ugt2b34	UDP glucuronosyltransferase 2 family, polypeptide B34 [Source:MGI Symbol;Acc:MGI:2140962]	4312	NA	NA	NA	NA	NA	0	0	0	0	0
ENSMUST00000163643.2	ENSMUSG00000006276	Eps15l1	epidermal growth factor receptor pathway substrate 15-like 1 [Source:MGI Symbol;Acc:MGI:104582]	3129	160.415730337078	175.898550724637	143.416666666666	164.435897435897	180.323943661971	89	69	60	39	71
ENSMUST00000212121.1	ENSMUSG00000006276	Eps15l1	epidermal growth factor receptor pathway substrate 15-like 1 [Source:MGI Symbol;Acc:MGI:104582]	2686	224.181818181818	206.083333333333	172.75	198.5	149.285714285714	11	12	8	6	7
ENSMUST00000212257.1	ENSMUSG00000006276	Eps15l1	epidermal growth factor receptor pathway substrate 15-like 1 [Source:MGI Symbol;Acc:MGI:104582]	1029	NA	NA	NA	NA	NA	0	0	0	0	0
ENSMUST00000212950.1	ENSMUSG00000006276	Eps15l1	epidermal growth factor receptor pathway substrate 15-like 1 [Source:MGI Symbol;Acc:MGI:104582]	2620	NA	NA	NA	NA	NA	0	0	0	0	0
ENSMUST00000212590.1	ENSMUSG00000006276	Eps15l1	epidermal growth factor receptor pathway substrate 15-like 1 [Source:MGI Symbol;Acc:MGI:104582]	3376	233.2	80	224	191.5	133.666666666666	5	1	3	2	6
ENSMUST00000211977.1	ENSMUSG00000006276	Eps15l1	epidermal growth factor receptor pathway substrate 15-like 1 [Source:MGI Symbol;Acc:MGI:104582]	1641	92	NA	NA	NA	NA	1	0	0	0	0
ENSMUST00000079041.6	ENSMUSG00000060181	Slc35e3	solute carrier family 35, member E3 [Source:MGI Symbol;Acc:MGI:2448489]	3489	159.74193548387	143.346666666666	142.967213114754	140.306122448979	145.882352941176	62	75	61	49	85
ENSMUST00000219482.1	ENSMUSG00000060181	Slc35e3	solute carrier family 35, member E3 [Source:MGI Symbol;Acc:MGI:2448489]	666	NA	NA	NA	NA	NA	0	0	0	0	0
ENSMUST00000056073.13	ENSMUSG00000039543	Cfap70	cilia and flagella associated protein 70 [Source:MGI Symbol;Acc:MGI:1923920]	3615	213.5	294	157.5	NA	NA	2	1	2	0	0
ENSMUST00000022349.13	ENSMUSG00000039543	Cfap70	cilia and flagella associated protein 70 [Source:MGI Symbol;Acc:MGI:1923920]	3549	NA	NA	NA	NA	NA	0	0	0	0	0
ENSMUST00000022348.14	ENSMUSG00000039543	Cfap70	cilia and flagella associated protein 70 [Source:MGI Symbol;Acc:MGI:1923920]	3469	NA	NA	NA	NA	NA	0	0	0	0	0
ENSMUST00000141432.7	ENSMUSG00000039543	Cfap70	cilia and flagella associated protein 70 [Source:MGI Symbol;Acc:MGI:1923920]	1630	NA	NA	NA	NA	NA	0	0	0	0	0
ENSMUST00000148692.1	ENSMUSG00000039543	Cfap70	cilia and flagella associated protein 70 [Source:MGI Symbol;Acc:MGI:1923920]	440	NA	NA	NA	NA	NA	0	0	0	0	0
ENSMUST00000143940.1	ENSMUSG00000039543	Cfap70	cilia and flagella associated protein 70 [Source:MGI Symbol;Acc:MGI:1923920]	409	NA	NA	NA	NA	NA	0	0	0	0	0
ENSMUST00000021135.4	ENSMUSG00000020783	Ncbp3	nuclear cap binding subunit 3 [Source:MGI Symbol;Acc:MGI:1914124]	12106	157.057142857142	160.888888888888	139.302325581395	143.333333333333	142.853658536585	35	27	43	30	41
ENSMUST00000144262.7	ENSMUSG00000020783	Ncbp3	nuclear cap binding subunit 3 [Source:MGI Symbol;Acc:MGI:1914124]	2443	NA	NA	NA	NA	NA	0	0	0	0	0
ENSMUST00000151823.1	ENSMUSG00000020783	Ncbp3	nuclear cap binding subunit 3 [Source:MGI Symbol;Acc:MGI:1914124]	3591	NA	NA	NA	NA	NA	0	0	0	0	0
ENSMUST00000028859.7	ENSMUSG00000027380	Acoxl	acyl-Coenzyme A oxidase-like [Source:MGI Symbol;Acc:MGI:1921371]	2842	NA	NA	221	71	NA	0	0	1	1	0
ENSMUST00000126410.1	ENSMUSG00000027380	Acoxl	acyl-Coenzyme A oxidase-like [Source:MGI Symbol;Acc:MGI:1921371]	531	NA	NA	NA	NA	NA	0	0	0	0	0
ENSMUST00000110344.1	ENSMUSG00000027380	Acoxl	acyl-Coenzyme A oxidase-like [Source:MGI Symbol;Acc:MGI:1921371]	1573	NA	NA	NA	NA	144	0	0	0	0	1
ENSMUST00000059986.2	ENSMUSG00000044164	Rnf182	ring finger protein 182 [Source:MGI Symbol;Acc:MGI:3045355]	3544	102.95	133.48	138.925925925925	110.923076923076	153.705882352941	20	25	27	13	17
ENSMUST00000161817.1	ENSMUSG00000044164	Rnf182	ring finger protein 182 [Source:MGI Symbol;Acc:MGI:3045355]	457	NA	NA	NA	NA	NA	0	0	0	0	0
ENSMUST00000163153.8	ENSMUSG00000032050	Rdx	radixin [Source:MGI Symbol;Acc:MGI:97887]	4131	145.168539325842	146.886363636363	142.151162790697	126.627450980392	135.910447761194	89	88	86	51	67
ENSMUST00000000590.15	ENSMUSG00000032050	Rdx	radixin [Source:MGI Symbol;Acc:MGI:97887]	4380	171	148.27027027027	153.375	152.631578947368	131.571428571428	26	37	32	19	28
ENSMUST00000238858.1	ENSMUSG00000032050	Rdx	radixin [Source:MGI Symbol;Acc:MGI:97887]	2163	NA	NA	NA	NA	NA	0	0	0	0	0
ENSMUST00000061352.10	ENSMUSG00000032050	Rdx	radixin [Source:MGI Symbol;Acc:MGI:97887]	1502	2	NA	NA	NA	NA	1	0	0	0	0
ENSMUST00000193931.1	ENSMUSG00000026494	Kif26b	kinesin family member 26B [Source:MGI Symbol;Acc:MGI:2447076]	2135	NA	NA	NA	NA	156	0	0	0	0	1
ENSMUST00000161017.7	ENSMUSG00000026494	Kif26b	kinesin family member 26B [Source:MGI Symbol;Acc:MGI:2447076]	13749	141.75	176.928571428571	154.666666666666	143.75	166.2	8	14	6	4	5
ENSMUST00000160789.1	ENSMUSG00000026494	Kif26b	kinesin family member 26B [Source:MGI Symbol;Acc:MGI:2447076]	6216	95	170.5	111	183	NA	1	2	1	1	0
ENSMUST00000035301.6	ENSMUSG00000039105	Atp6v1g1	ATPase, H+ transporting, lysosomal V1 subunit G1 [Source:MGI Symbol;Acc:MGI:1913540]	1135	117.107255520504	113.525179856115	115.422558922558	115.071910112359	114.5875	634	695	594	445	640
ENSMUST00000033888.4	ENSMUSG00000040197	Cd209e	CD209e antigen [Source:MGI Symbol;Acc:MGI:2157948]	1802	NA	NA	NA	NA	NA	0	0	0	0	0
ENSMUST00000055159.7	ENSMUSG00000043157	Arl11	ADP-ribosylation factor-like 11 [Source:MGI Symbol;Acc:MGI:2444054]	1482	144.25	187	NA	92	203.5	4	1	0	3	2
ENSMUST00000224727.1	ENSMUSG00000043157	Arl11	ADP-ribosylation factor-like 11 [Source:MGI Symbol;Acc:MGI:2444054]	2095	NA	NA	NA	NA	NA	0	0	0	0	0
ENSMUST00000152204.2	ENSMUSG00000074895	Eif4e1b	eukaryotic translation initiation factor 4E family member 1B [Source:MGI Symbol;Acc:MGI:2685119]	859	NA	NA	NA	NA	NA	0	0	0	0	0
ENSMUST00000110003.8	ENSMUSG00000074895	Eif4e1b	eukaryotic translation initiation factor 4E family member 1B [Source:MGI Symbol;Acc:MGI:2685119]	2131	NA	NA	NA	NA	NA	0	0	0	0	0
ENSMUST00000132728.7	ENSMUSG00000074895	Eif4e1b	eukaryotic translation initiation factor 4E family member 1B [Source:MGI Symbol;Acc:MGI:2685119]	1897	NA	NA	NA	NA	NA	0	0	0	0	0
ENSMUST00000141398.1	ENSMUSG00000074895	Eif4e1b	eukaryotic translation initiation factor 4E family member 1B [Source:MGI Symbol;Acc:MGI:2685119]	727	NA	NA	NA	NA	NA	0	0	0	0	0
ENSMUST00000142158.7	ENSMUSG00000074895	Eif4e1b	eukaryotic translation initiation factor 4E family member 1B [Source:MGI Symbol;Acc:MGI:2685119]	747	NA	NA	NA	NA	NA	0	0	0	0	0
ENSMUST00000139184.7	ENSMUSG00000074895	Eif4e1b	eukaryotic translation initiation factor 4E family member 1B [Source:MGI Symbol;Acc:MGI:2685119]	668	NA	NA	NA	NA	NA	0	0	0	0	0
ENSMUST00000132415.7	ENSMUSG00000074895	Eif4e1b	eukaryotic translation initiation factor 4E family member 1B [Source:MGI Symbol;Acc:MGI:2685119]	501	NA	NA	NA	NA	NA	0	0	0	0	0
ENSMUST00000132005.7	ENSMUSG00000074895	Eif4e1b	eukaryotic translation initiation factor 4E family member 1B [Source:MGI Symbol;Acc:MGI:2685119]	706	NA	NA	NA	NA	NA	0	0	0	0	0
ENSMUST00000126785.7	ENSMUSG00000074895	Eif4e1b	eukaryotic translation initiation factor 4E family member 1B [Source:MGI Symbol;Acc:MGI:2685119]	841	NA	NA	NA	NA	NA	0	0	0	0	0
ENSMUST00000126525.7	ENSMUSG00000074895	Eif4e1b	eukaryotic translation initiation factor 4E family member 1B [Source:MGI Symbol;Acc:MGI:2685119]	652	NA	NA	NA	NA	NA	0	0	0	0	0
ENSMUST00000114318.9	ENSMUSG00000026959	Grin1	glutamate receptor, ionotropic, NMDA1 (zeta 1) [Source:MGI Symbol;Acc:MGI:95819]	3920	146.422535211267	146.166666666666	159.267605633802	164.1	138.784615384615	71	66	71	40	65
ENSMUST00000114310.9	ENSMUSG00000026959	Grin1	glutamate receptor, ionotropic, NMDA1 (zeta 1) [Source:MGI Symbol;Acc:MGI:95819]	4276	166.231292517006	157.280487804878	153.798742138364	159.791208791208	154.773255813953	147	164	159	91	172
ENSMUST00000114308.9	ENSMUSG00000026959	Grin1	glutamate receptor, ionotropic, NMDA1 (zeta 1) [Source:MGI Symbol;Acc:MGI:95819]	4165	170.941747572815	169.872180451127	165.113821138211	166.168539325842	180.116071428571	103	133	123	89	112
ENSMUST00000114317.9	ENSMUSG00000026959	Grin1	glutamate receptor, ionotropic, NMDA1 (zeta 1) [Source:MGI Symbol;Acc:MGI:95819]	3809	147.172413793103	148.231481481481	147.493670886075	138.662790697674	147.457627118644	87	108	79	86	118
ENSMUST00000028335.12	ENSMUSG00000026959	Grin1	glutamate receptor, ionotropic, NMDA1 (zeta 1) [Source:MGI Symbol;Acc:MGI:95819]	4238	168.046296296296	159.412244897959	153.490909090909	150.09493670886	163.5468164794	216	245	220	158	267
ENSMUST00000114314.9	ENSMUSG00000026959	Grin1	glutamate receptor, ionotropic, NMDA1 (zeta 1) [Source:MGI Symbol;Acc:MGI:95819]	3882	160.486486486486	151.090909090909	165.247191011235	150.939393939393	163.095744680851	74	77	89	66	94
ENSMUST00000114307.7	ENSMUSG00000026959	Grin1	glutamate receptor, ionotropic, NMDA1 (zeta 1) [Source:MGI Symbol;Acc:MGI:95819]	4127	178.60162601626	177.839743589743	162.264	164.466666666666	159.150943396226	123	156	125	75	106
ENSMUST00000114312.1	ENSMUSG00000026959	Grin1	glutamate receptor, ionotropic, NMDA1 (zeta 1) [Source:MGI Symbol;Acc:MGI:95819]	3838	148.842105263157	151.495867768595	153.566433566433	144.356164383561	151.095652173913	95	121	143	73	115
ENSMUST00000127171.1	ENSMUSG00000026959	Grin1	glutamate receptor, ionotropic, NMDA1 (zeta 1) [Source:MGI Symbol;Acc:MGI:95819]	527	NA	NA	NA	NA	NA	0	0	0	0	0
ENSMUST00000135426.1	ENSMUSG00000026959	Grin1	glutamate receptor, ionotropic, NMDA1 (zeta 1) [Source:MGI Symbol;Acc:MGI:95819]	456	NA	NA	NA	NA	NA	0	0	0	0	0
ENSMUST00000153465.1	ENSMUSG00000026959	Grin1	glutamate receptor, ionotropic, NMDA1 (zeta 1) [Source:MGI Symbol;Acc:MGI:95819]	634	NA	NA	NA	NA	NA	0	0	0	0	0
ENSMUST00000153551.1	ENSMUSG00000026959	Grin1	glutamate receptor, ionotropic, NMDA1 (zeta 1) [Source:MGI Symbol;Acc:MGI:95819]	731	NA	NA	NA	NA	NA	0	0	0	0	0
ENSMUST00000155627.1	ENSMUSG00000026959	Grin1	glutamate receptor, ionotropic, NMDA1 (zeta 1) [Source:MGI Symbol;Acc:MGI:95819]	3437	NA	NA	NA	NA	117	0	0	0	0	1
ENSMUST00000144402.1	ENSMUSG00000026959	Grin1	glutamate receptor, ionotropic, NMDA1 (zeta 1) [Source:MGI Symbol;Acc:MGI:95819]	3024	73	NA	65	5	NA	1	0	1	1	0
ENSMUST00000034478.2	ENSMUSG00000031995	St14	suppression of tumorigenicity 14 (colon carcinoma) [Source:MGI Symbol;Acc:MGI:1338881]	3259	128	NA	232	NA	74	1	0	2	0	1
ENSMUST00000148789.7	ENSMUSG00000031995	St14	suppression of tumorigenicity 14 (colon carcinoma) [Source:MGI Symbol;Acc:MGI:1338881]	2686	NA	NA	NA	NA	NA	0	0	0	0	0
ENSMUST00000217404.1	ENSMUSG00000031995	St14	suppression of tumorigenicity 14 (colon carcinoma) [Source:MGI Symbol;Acc:MGI:1338881]	3550	94.5	158.25	146.666666666666	159	133.5	2	4	3	1	2
ENSMUST00000133904.1	ENSMUSG00000031995	St14	suppression of tumorigenicity 14 (colon carcinoma) [Source:MGI Symbol;Acc:MGI:1338881]	422	NA	NA	NA	NA	NA	0	0	0	0	0
ENSMUST00000214418.1	ENSMUSG00000031995	St14	suppression of tumorigenicity 14 (colon carcinoma) [Source:MGI Symbol;Acc:MGI:1338881]	686	NA	NA	NA	NA	NA	0	0	0	0	0
ENSMUST00000123557.1	ENSMUSG00000031995	St14	suppression of tumorigenicity 14 (colon carcinoma) [Source:MGI Symbol;Acc:MGI:1338881]	1064	NA	NA	NA	NA	NA	0	0	0	0	0
ENSMUST00000202730.3	ENSMUSG00000094719	Gm5108	predicted gene 5108 [Source:MGI Symbol;Acc:MGI:3645064]	543	NA	104	NA	NA	NA	0	1	0	0	0
ENSMUST00000201736.3	ENSMUSG00000094719	Gm5108	predicted gene 5108 [Source:MGI Symbol;Acc:MGI:3645064]	278	NA	NA	NA	NA	NA	0	0	0	0	0
ENSMUST00000201798.1	ENSMUSG00000094719	Gm5108	predicted gene 5108 [Source:MGI Symbol;Acc:MGI:3645064]	330	NA	NA	NA	NA	NA	0	0	0	0	0
ENSMUST00000177891.1	ENSMUSG00000094719	Gm5108	predicted gene 5108 [Source:MGI Symbol;Acc:MGI:3645064]	543	NA	NA	NA	NA	NA	0	0	0	0	0
ENSMUST00000200682.1	ENSMUSG00000037355	Uvssa	UV stimulated scaffold protein A [Source:MGI Symbol;Acc:MGI:1918351]	3238	NA	NA	71	NA	NA	0	0	1	0	0
ENSMUST00000087864.11	ENSMUSG00000037355	Uvssa	UV stimulated scaffold protein A [Source:MGI Symbol;Acc:MGI:1918351]	7326	229.5	290.666666666666	169	320	365.666666666666	2	3	1	1	3
ENSMUST00000202046.3	ENSMUSG00000037355	Uvssa	UV stimulated scaffold protein A [Source:MGI Symbol;Acc:MGI:1918351]	7222	372.5	231.5	258	196	290.333333333333	2	2	3	2	3
ENSMUST00000202816.1	ENSMUSG00000037355	Uvssa	UV stimulated scaffold protein A [Source:MGI Symbol;Acc:MGI:1918351]	7165	262.5	229.333333333333	219	258	NA	2	3	2	2	0
ENSMUST00000217772.1	ENSMUSG00000108919	Olfr1295	olfactory receptor 1295 [Source:MGI Symbol;Acc:MGI:3031129]	5539	NA	NA	NA	NA	NA	0	0	0	0	0
ENSMUST00000207283.2	ENSMUSG00000108919	Olfr1295	olfactory receptor 1295 [Source:MGI Symbol;Acc:MGI:3031129]	1282	NA	NA	NA	NA	NA	0	0	0	0	0
ENSMUST00000207786.2	ENSMUSG00000108919	Olfr1295	olfactory receptor 1295 [Source:MGI Symbol;Acc:MGI:3031129]	1043	NA	NA	NA	NA	NA	0	0	0	0	0
ENSMUST00000044751.13	ENSMUSG00000039686	Zer1	zyg-11 related, cell cycle regulator [Source:MGI Symbol;Acc:MGI:2442511]	4100	167.027777777777	173.779816513761	153.35606060606	168.5	151.112244897959	144	109	132	76	98
ENSMUST00000113677.2	ENSMUSG00000039686	Zer1	zyg-11 related, cell cycle regulator [Source:MGI Symbol;Acc:MGI:2442511]	4189	158.770833333333	164.090517241379	160.995412844036	151.790322580645	167.350210970464	240	232	218	186	237
ENSMUST00000152285.1	ENSMUSG00000039686	Zer1	zyg-11 related, cell cycle regulator [Source:MGI Symbol;Acc:MGI:2442511]	721	NA	NA	NA	NA	NA	0	0	0	0	0
ENSMUST00000152068.1	ENSMUSG00000039686	Zer1	zyg-11 related, cell cycle regulator [Source:MGI Symbol;Acc:MGI:2442511]	880	NA	NA	NA	NA	NA	0	0	0	0	0
ENSMUST00000154231.7	ENSMUSG00000039686	Zer1	zyg-11 related, cell cycle regulator [Source:MGI Symbol;Acc:MGI:2442511]	3934	NA	NA	NA	NA	280	0	0	0	0	1
ENSMUST00000133354.1	ENSMUSG00000039686	Zer1	zyg-11 related, cell cycle regulator [Source:MGI Symbol;Acc:MGI:2442511]	3765	NA	NA	NA	NA	NA	0	0	0	0	0
ENSMUST00000139128.1	ENSMUSG00000039686	Zer1	zyg-11 related, cell cycle regulator [Source:MGI Symbol;Acc:MGI:2442511]	3097	NA	NA	NA	NA	NA	0	0	0	0	0
ENSMUST00000131858.1	ENSMUSG00000039686	Zer1	zyg-11 related, cell cycle regulator [Source:MGI Symbol;Acc:MGI:2442511]	363	NA	NA	NA	NA	NA	0	0	0	0	0
ENSMUST00000149818.1	ENSMUSG00000039686	Zer1	zyg-11 related, cell cycle regulator [Source:MGI Symbol;Acc:MGI:2442511]	623	NA	NA	NA	NA	NA	0	0	0	0	0
ENSMUST00000190233.1	ENSMUSG00000101113	1700025B11Rik	RIKEN cDNA 1700025B11 gene [Source:MGI Symbol;Acc:MGI:1923659]	553	NA	NA	NA	NA	NA	0	0	0	0	0
ENSMUST00000138563.8	ENSMUSG00000037225	Fgf2	fibroblast growth factor 2 [Source:MGI Symbol;Acc:MGI:95516]	1240	NA	NA	NA	NA	NA	0	0	0	0	0
ENSMUST00000200585.4	ENSMUSG00000037225	Fgf2	fibroblast growth factor 2 [Source:MGI Symbol;Acc:MGI:95516]	5973	216.75	163.1	148.333333333333	85	215.4	4	10	9	3	5
ENSMUST00000038885.9	ENSMUSG00000037225	Fgf2	fibroblast growth factor 2 [Source:MGI Symbol;Acc:MGI:95516]	462	NA	NA	NA	NA	NA	0	0	0	0	0
ENSMUST00000150021.7	ENSMUSG00000037225	Fgf2	fibroblast growth factor 2 [Source:MGI Symbol;Acc:MGI:95516]	380	NA	NA	NA	NA	NA	0	0	0	0	0
ENSMUST00000145228.1	ENSMUSG00000037225	Fgf2	fibroblast growth factor 2 [Source:MGI Symbol;Acc:MGI:95516]	485	NA	NA	NA	NA	NA	0	0	0	0	0
ENSMUST00000108120.7	ENSMUSG00000037225	Fgf2	fibroblast growth factor 2 [Source:MGI Symbol;Acc:MGI:95516]	526	NA	NA	NA	NA	NA	0	0	0	0	0
ENSMUST00000091203.1	ENSMUSG00000037225	Fgf2	fibroblast growth factor 2 [Source:MGI Symbol;Acc:MGI:95516]	535	NA	NA	NA	NA	NA	0	0	0	0	0
ENSMUST00000199938.1	ENSMUSG00000037225	Fgf2	fibroblast growth factor 2 [Source:MGI Symbol;Acc:MGI:95516]	257	NA	NA	NA	NA	NA	0	0	0	0	0
ENSMUST00000149299.1	ENSMUSG00000021464	Ror2	receptor tyrosine kinase-like orphan receptor 2 [Source:MGI Symbol;Acc:MGI:1347521]	324	NA	NA	NA	NA	NA	0	0	0	0	0
ENSMUST00000021918.8	ENSMUSG00000021464	Ror2	receptor tyrosine kinase-like orphan receptor 2 [Source:MGI Symbol;Acc:MGI:1347521]	3985	255	192	99.5	NA	85	1	1	2	0	1
ENSMUST00000130235.7	ENSMUSG00000021464	Ror2	receptor tyrosine kinase-like orphan receptor 2 [Source:MGI Symbol;Acc:MGI:1347521]	3730	NA	99.5	182	42	156	0	2	1	1	1
ENSMUST00000186004.1	ENSMUSG00000101766	Gm20908	predicted gene, 20908 [Source:MGI Symbol;Acc:MGI:5434264]	922	NA	NA	NA	NA	NA	0	0	0	0	0
ENSMUST00000040880.8	ENSMUSG00000041205	Map6d1	MAP6 domain containing 1 [Source:MGI Symbol;Acc:MGI:3607784]	3280	173.678787878787	172.510752688172	169.005434782608	171.032520325203	173.938775510204	165	186	184	123	147
ENSMUST00000028467.5	ENSMUSG00000027073	Prg2	proteoglycan 2, bone marrow [Source:MGI Symbol;Acc:MGI:103294]	838	NA	NA	NA	NA	NA	0	0	0	0	0
ENSMUST00000105256.9	ENSMUSG00000078429	Ctdsp2	CTD (carboxy-terminal domain, RNA polymerase II, polypeptide A) small phosphatase 2 [Source:MGI Symbol;Acc:MGI:1098748]	4817	161.463768115942	163.973913043478	155.586466165413	158.781512605042	166.682926829268	138	115	133	119	123
ENSMUST00000219917.1	ENSMUSG00000078429	Ctdsp2	CTD (carboxy-terminal domain, RNA polymerase II, polypeptide A) small phosphatase 2 [Source:MGI Symbol;Acc:MGI:1098748]	732	NA	NA	NA	NA	NA	0	0	0	0	0
ENSMUST00000217738.1	ENSMUSG00000078429	Ctdsp2	CTD (carboxy-terminal domain, RNA polymerase II, polypeptide A) small phosphatase 2 [Source:MGI Symbol;Acc:MGI:1098748]	723	NA	NA	NA	NA	NA	0	0	0	0	0
ENSMUST00000105255.2	ENSMUSG00000078429	Ctdsp2	CTD (carboxy-terminal domain, RNA polymerase II, polypeptide A) small phosphatase 2 [Source:MGI Symbol;Acc:MGI:1098748]	4136	186.625	181.057971014492	191.0625	153.837837837837	166.174603174603	80	69	64	37	63
ENSMUST00000042227.14	ENSMUSG00000041623	D11Wsu47e	DNA segment, Chr 11, Wayne State University 47, expressed [Source:MGI Symbol;Acc:MGI:106356]	2196	154	150.666666666666	120.5	99.5	104.6	5	6	8	2	10
ENSMUST00000123466.1	ENSMUSG00000041623	D11Wsu47e	DNA segment, Chr 11, Wayne State University 47, expressed [Source:MGI Symbol;Acc:MGI:106356]	794	NA	NA	NA	NA	NA	0	0	0	0	0
ENSMUST00000106621.3	ENSMUSG00000041623	D11Wsu47e	DNA segment, Chr 11, Wayne State University 47, expressed [Source:MGI Symbol;Acc:MGI:106356]	2062	146.111111111111	117.666666666666	134.545454545454	118.25	116.666666666666	9	12	11	4	9
ENSMUST00000153732.1	ENSMUSG00000041623	D11Wsu47e	DNA segment, Chr 11, Wayne State University 47, expressed [Source:MGI Symbol;Acc:MGI:106356]	541	NA	NA	NA	NA	NA	0	0	0	0	0
ENSMUST00000114143.9	ENSMUSG00000031399	Fam3a	family with sequence similarity 3, member A [Source:MGI Symbol;Acc:MGI:1913544]	1899	147.538461538461	169.631578947368	166.72	155.071428571428	164.781818181818	52	57	50	42	55
ENSMUST00000015427.12	ENSMUSG00000031399	Fam3a	family with sequence similarity 3, member A [Source:MGI Symbol;Acc:MGI:1913544]	1427	NA	177	NA	NA	NA	0	1	0	0	0
ENSMUST00000114142.7	ENSMUSG00000031399	Fam3a	family with sequence similarity 3, member A [Source:MGI Symbol;Acc:MGI:1913544]	1586	153	NA	273	130	NA	1	0	1	1	0
ENSMUST00000114141.7	ENSMUSG00000031399	Fam3a	family with sequence similarity 3, member A [Source:MGI Symbol;Acc:MGI:1913544]	1243	NA	NA	NA	NA	NA	0	0	0	0	0
ENSMUST00000114139.7	ENSMUSG00000031399	Fam3a	family with sequence similarity 3, member A [Source:MGI Symbol;Acc:MGI:1913544]	931	NA	NA	NA	NA	NA	0	0	0	0	0
ENSMUST00000122894.7	ENSMUSG00000031399	Fam3a	family with sequence similarity 3, member A [Source:MGI Symbol;Acc:MGI:1913544]	814	NA	NA	NA	NA	NA	0	0	0	0	0
ENSMUST00000149218.7	ENSMUSG00000031399	Fam3a	family with sequence similarity 3, member A [Source:MGI Symbol;Acc:MGI:1913544]	941	NA	NA	NA	NA	NA	0	0	0	0	0
ENSMUST00000136716.1	ENSMUSG00000031399	Fam3a	family with sequence similarity 3, member A [Source:MGI Symbol;Acc:MGI:1913544]	769	NA	NA	NA	207	NA	0	0	0	1	0
ENSMUST00000114138.7	ENSMUSG00000031399	Fam3a	family with sequence similarity 3, member A [Source:MGI Symbol;Acc:MGI:1913544]	507	NA	NA	NA	NA	115	0	0	0	0	1
ENSMUST00000141604.1	ENSMUSG00000031399	Fam3a	family with sequence similarity 3, member A [Source:MGI Symbol;Acc:MGI:1913544]	446	NA	114	172	107	185	0	1	2	1	1
ENSMUST00000230669.1	ENSMUSG00000022476	Polr3h	polymerase (RNA) III (DNA directed) polypeptide H [Source:MGI Symbol;Acc:MGI:1926179]	3030	NA	174	142	NA	NA	0	1	1	0	0
ENSMUST00000230066.1	ENSMUSG00000022476	Polr3h	polymerase (RNA) III (DNA directed) polypeptide H [Source:MGI Symbol;Acc:MGI:1926179]	438	110.4	109.25	109.130434782608	108.538461538461	101.142857142857	15	16	23	13	7
ENSMUST00000023113.6	ENSMUSG00000022476	Polr3h	polymerase (RNA) III (DNA directed) polypeptide H [Source:MGI Symbol;Acc:MGI:1926179]	2542	127.450704225352	130.485029940119	132.561643835616	132.710280373831	130.215189873417	142	167	146	107	158
ENSMUST00000230050.1	ENSMUSG00000022476	Polr3h	polymerase (RNA) III (DNA directed) polypeptide H [Source:MGI Symbol;Acc:MGI:1926179]	765	NA	NA	NA	NA	NA	0	0	0	0	0
ENSMUST00000230765.1	ENSMUSG00000022476	Polr3h	polymerase (RNA) III (DNA directed) polypeptide H [Source:MGI Symbol;Acc:MGI:1926179]	1290	NA	NA	NA	NA	NA	0	0	0	0	0
ENSMUST00000230842.1	ENSMUSG00000022476	Polr3h	polymerase (RNA) III (DNA directed) polypeptide H [Source:MGI Symbol;Acc:MGI:1926179]	498	NA	NA	NA	NA	NA	0	0	0	0	0
ENSMUST00000229402.1	ENSMUSG00000022476	Polr3h	polymerase (RNA) III (DNA directed) polypeptide H [Source:MGI Symbol;Acc:MGI:1926179]	985	NA	NA	NA	NA	NA	0	0	0	0	0
ENSMUST00000185675.6	ENSMUSG00000032252	Glce	glucuronyl C5-epimerase [Source:MGI Symbol;Acc:MGI:2136405]	4850	130.086956521739	166.196428571428	148.4	144.5625	157.807692307692	46	56	30	32	52
ENSMUST00000186514.1	ENSMUSG00000032252	Glce	glucuronyl C5-epimerase [Source:MGI Symbol;Acc:MGI:2136405]	2097	NA	NA	NA	NA	NA	0	0	0	0	0
ENSMUST00000185873.1	ENSMUSG00000032252	Glce	glucuronyl C5-epimerase [Source:MGI Symbol;Acc:MGI:2136405]	317	NA	NA	NA	NA	NA	0	0	0	0	0
ENSMUST00000185510.1	ENSMUSG00000032252	Glce	glucuronyl C5-epimerase [Source:MGI Symbol;Acc:MGI:2136405]	1922	76.5	147	NA	189	138	2	2	0	1	2
ENSMUST00000034785.7	ENSMUSG00000032252	Glce	glucuronyl C5-epimerase [Source:MGI Symbol;Acc:MGI:2136405]	4626	127.260869565217	139.086956521739	145.15625	125.8125	154.966666666666	23	23	32	16	30
ENSMUST00000003687.7	ENSMUSG00000021253	Tgfb3	transforming growth factor, beta 3 [Source:MGI Symbol;Acc:MGI:98727]	3383	139.096774193548	152.4	133.85	144.6	133.090909090909	31	35	20	25	33
ENSMUST00000028466.11	ENSMUSG00000027072	Prg3	proteoglycan 3 [Source:MGI Symbol;Acc:MGI:1858200]	949	NA	NA	NA	NA	NA	0	0	0	0	0
ENSMUST00000135939.1	ENSMUSG00000027072	Prg3	proteoglycan 3 [Source:MGI Symbol;Acc:MGI:1858200]	481	NA	NA	NA	NA	NA	0	0	0	0	0
ENSMUST00000062528.8	ENSMUSG00000050840	Cdh20	cadherin 20 [Source:MGI Symbol;Acc:MGI:1346069]	4012	155.170731707317	143.617021276595	163.379310344827	127.416666666666	152.35294117647	41	47	29	12	34
ENSMUST00000146173.1	ENSMUSG00000038009	Dnajc22	DnaJ heat shock protein family (Hsp40) member C22 [Source:MGI Symbol;Acc:MGI:1920028]	381	NA	NA	NA	NA	NA	0	0	0	0	0
ENSMUST00000061295.6	ENSMUSG00000038009	Dnajc22	DnaJ heat shock protein family (Hsp40) member C22 [Source:MGI Symbol;Acc:MGI:1920028]	1564	NA	NA	NA	NA	NA	0	0	0	0	0
ENSMUST00000080762.11	ENSMUSG00000021345	Prl8a6	prolactin family 8, subfamily a, member 6 [Source:MGI Symbol;Acc:MGI:1332225]	1020	NA	NA	NA	NA	NA	0	0	0	0	0
ENSMUST00000018392.8	ENSMUSG00000021345	Prl8a6	prolactin family 8, subfamily a, member 6 [Source:MGI Symbol;Acc:MGI:1332225]	900	NA	NA	NA	NA	NA	0	0	0	0	0
ENSMUST00000110355.9	ENSMUSG00000021345	Prl8a6	prolactin family 8, subfamily a, member 6 [Source:MGI Symbol;Acc:MGI:1332225]	843	NA	NA	NA	NA	NA	0	0	0	0	0
ENSMUST00000085455.5	ENSMUSG00000066516	Klk1b21	kallikrein 1-related peptidase b21 [Source:MGI Symbol;Acc:MGI:892022]	871	NA	NA	NA	NA	NA	0	0	0	0	0
ENSMUST00000057975.7	ENSMUSG00000051444	Bbs12	Bardet-Biedl syndrome 12 (human) [Source:MGI Symbol;Acc:MGI:2686651]	2433	115.5	210	122.5	160.333333333333	165.5	6	6	4	3	4
ENSMUST00000108121.3	ENSMUSG00000051444	Bbs12	Bardet-Biedl syndrome 12 (human) [Source:MGI Symbol;Acc:MGI:2686651]	2348	216	220.75	120	136	386	2	4	1	5	1
ENSMUST00000037260.7	ENSMUSG00000050846	Zfp623	zinc finger protein 623 [Source:MGI Symbol;Acc:MGI:1926084]	2486	159.612903225806	120.567567567567	140.53125	119.15	146.714285714285	31	37	32	20	14
ENSMUST00000071103.9	ENSMUSG00000037149	Ddx1	DEAD (Asp-Glu-Ala-Asp) box polypeptide 1 [Source:MGI Symbol;Acc:MGI:2144727]	4842	129.411764705882	132.423423423423	128.021604938271	120.803738317757	129.779552715654	323	333	324	214	313
ENSMUST00000221028.1	ENSMUSG00000037149	Ddx1	DEAD (Asp-Glu-Ala-Asp) box polypeptide 1 [Source:MGI Symbol;Acc:MGI:2144727]	667	NA	NA	NA	NA	NA	0	0	0	0	0
ENSMUST00000221623.1	ENSMUSG00000037149	Ddx1	DEAD (Asp-Glu-Ala-Asp) box polypeptide 1 [Source:MGI Symbol;Acc:MGI:2144727]	724	NA	NA	NA	NA	NA	0	0	0	0	0
ENSMUST00000056949.4	ENSMUSG00000046846	Spesp1	sperm equatorial segment protein 1 [Source:MGI Symbol;Acc:MGI:1913962]	3042	NA	NA	NA	NA	NA	0	0	0	0	0
ENSMUST00000149399.7	ENSMUSG00000009628	Tex15	testis expressed gene 15 [Source:MGI Symbol;Acc:MGI:1934816]	706	NA	NA	NA	NA	NA	0	0	0	0	0
ENSMUST00000124496.7	ENSMUSG00000009628	Tex15	testis expressed gene 15 [Source:MGI Symbol;Acc:MGI:1934816]	4014	NA	NA	NA	NA	NA	0	0	0	0	0
ENSMUST00000124501.1	ENSMUSG00000009628	Tex15	testis expressed gene 15 [Source:MGI Symbol;Acc:MGI:1934816]	2626	NA	NA	52	NA	NA	0	0	1	0	0
ENSMUST00000009772.7	ENSMUSG00000009628	Tex15	testis expressed gene 15 [Source:MGI Symbol;Acc:MGI:1934816]	8405	NA	NA	NA	227	NA	0	0	0	1	0
ENSMUST00000189109.6	ENSMUSG00000101155	Sly	Sycp3 like Y-linked [Source:MGI Symbol;Acc:MGI:2687328]	797	NA	NA	NA	NA	NA	0	0	0	0	0
ENSMUST00000191355.6	ENSMUSG00000101155	Sly	Sycp3 like Y-linked [Source:MGI Symbol;Acc:MGI:2687328]	548	NA	NA	NA	NA	NA	0	0	0	0	0
ENSMUST00000190676.1	ENSMUSG00000101155	Sly	Sycp3 like Y-linked [Source:MGI Symbol;Acc:MGI:2687328]	422	NA	NA	NA	NA	NA	0	0	0	0	0
ENSMUST00000190292.1	ENSMUSG00000101155	Sly	Sycp3 like Y-linked [Source:MGI Symbol;Acc:MGI:2687328]	922	NA	NA	NA	NA	NA	0	0	0	0	0
ENSMUST00000087316.5	ENSMUSG00000067276	Capn6	calpain 6 [Source:MGI Symbol;Acc:MGI:1100850]	3561	348.8	156	206	38	69.6666666666666	5	5	2	1	3
ENSMUST00000151154.1	ENSMUSG00000067276	Capn6	calpain 6 [Source:MGI Symbol;Acc:MGI:1100850]	4539	NA	NA	NA	NA	NA	0	0	0	0	0
ENSMUST00000060847.5	ENSMUSG00000034387	Ssu2	ssu-2 homolog (C. elegans) [Source:MGI Symbol;Acc:MGI:2443733]	1321	NA	56	55	NA	138	0	1	1	0	1
ENSMUST00000143134.7	ENSMUSG00000034387	Ssu2	ssu-2 homolog (C. elegans) [Source:MGI Symbol;Acc:MGI:2443733]	1553	NA	NA	NA	NA	NA	0	0	0	0	0
ENSMUST00000123254.1	ENSMUSG00000034387	Ssu2	ssu-2 homolog (C. elegans) [Source:MGI Symbol;Acc:MGI:2443733]	844	NA	NA	NA	NA	NA	0	0	0	0	0
ENSMUST00000238755.1	ENSMUSG00000034387	Ssu2	ssu-2 homolog (C. elegans) [Source:MGI Symbol;Acc:MGI:2443733]	1183	NA	NA	NA	NA	NA	0	0	0	0	0
ENSMUST00000108118.8	ENSMUSG00000050174	Nudt6	nudix (nucleoside diphosphate linked moiety X)-type motif 6 [Source:MGI Symbol;Acc:MGI:2387618]	935	NA	122	34	NA	NA	0	1	1	0	0
ENSMUST00000108117.2	ENSMUSG00000050174	Nudt6	nudix (nucleoside diphosphate linked moiety X)-type motif 6 [Source:MGI Symbol;Acc:MGI:2387618]	879	247	NA	NA	NA	184.5	2	0	0	0	2
ENSMUST00000052645.12	ENSMUSG00000050174	Nudt6	nudix (nucleoside diphosphate linked moiety X)-type motif 6 [Source:MGI Symbol;Acc:MGI:2387618]	1155	237.4	97.5	181.666666666666	187.25	134	5	8	6	4	4
ENSMUST00000146324.7	ENSMUSG00000050174	Nudt6	nudix (nucleoside diphosphate linked moiety X)-type motif 6 [Source:MGI Symbol;Acc:MGI:2387618]	1264	203.875	190.625	170.25	137	147.428571428571	8	8	4	1	7
ENSMUST00000141438.1	ENSMUSG00000050174	Nudt6	nudix (nucleoside diphosphate linked moiety X)-type motif 6 [Source:MGI Symbol;Acc:MGI:2387618]	899	NA	NA	NA	NA	NA	0	0	0	0	0
ENSMUST00000099130.8	ENSMUSG00000050174	Nudt6	nudix (nucleoside diphosphate linked moiety X)-type motif 6 [Source:MGI Symbol;Acc:MGI:2387618]	1070	159	169	189.75	166	168.5	2	1	4	1	2
ENSMUST00000133894.5	ENSMUSG00000050174	Nudt6	nudix (nucleoside diphosphate linked moiety X)-type motif 6 [Source:MGI Symbol;Acc:MGI:2387618]	562	NA	NA	NA	NA	NA	0	0	0	0	0
ENSMUST00000149449.7	ENSMUSG00000050174	Nudt6	nudix (nucleoside diphosphate linked moiety X)-type motif 6 [Source:MGI Symbol;Acc:MGI:2387618]	575	NA	NA	NA	NA	NA	0	0	0	0	0
ENSMUST00000198158.4	ENSMUSG00000050174	Nudt6	nudix (nucleoside diphosphate linked moiety X)-type motif 6 [Source:MGI Symbol;Acc:MGI:2387618]	573	NA	NA	NA	NA	NA	0	0	0	0	0
ENSMUST00000138949.1	ENSMUSG00000050174	Nudt6	nudix (nucleoside diphosphate linked moiety X)-type motif 6 [Source:MGI Symbol;Acc:MGI:2387618]	378	NA	NA	NA	NA	NA	0	0	0	0	0
ENSMUST00000021307.9	ENSMUSG00000020930	Ccdc103	coiled-coil domain containing 103 [Source:MGI Symbol;Acc:MGI:1920543]	1841	131.357142857142	110.8	84.3846153846153	124.142857142857	97.75	14	10	13	7	8
ENSMUST00000159834.1	ENSMUSG00000020930	Ccdc103	coiled-coil domain containing 103 [Source:MGI Symbol;Acc:MGI:1920543]	1156	133.333333333333	131.333333333333	80	NA	123	3	3	2	0	2
ENSMUST00000028314.8	ENSMUSG00000026946	Nmi	N-myc (and STAT) interactor [Source:MGI Symbol;Acc:MGI:1928368]	1291	134.166666666666	152.5	111	NA	43.5	6	4	1	0	2
ENSMUST00000112705.8	ENSMUSG00000026946	Nmi	N-myc (and STAT) interactor [Source:MGI Symbol;Acc:MGI:1928368]	1130	126.5	118.666666666666	130.111111111111	148.75	182	6	3	9	4	3
ENSMUST00000145656.1	ENSMUSG00000026946	Nmi	N-myc (and STAT) interactor [Source:MGI Symbol;Acc:MGI:1928368]	792	NA	NA	NA	NA	NA	0	0	0	0	0
ENSMUST00000145481.7	ENSMUSG00000026946	Nmi	N-myc (and STAT) interactor [Source:MGI Symbol;Acc:MGI:1928368]	1162	75.25	97	73.5	100.5	74	4	3	4	2	1
ENSMUST00000123521.1	ENSMUSG00000026946	Nmi	N-myc (and STAT) interactor [Source:MGI Symbol;Acc:MGI:1928368]	487	NA	NA	NA	NA	NA	0	0	0	0	0
ENSMUST00000142868.1	ENSMUSG00000026946	Nmi	N-myc (and STAT) interactor [Source:MGI Symbol;Acc:MGI:1928368]	388	NA	NA	NA	NA	NA	0	0	0	0	0
ENSMUST00000108287.9	ENSMUSG00000050132	Sarm1	sterile alpha and HEAT/Armadillo motif containing 1 [Source:MGI Symbol;Acc:MGI:2136419]	4868	146.25	207.166666666666	137.928571428571	120.25	130.142857142857	4	12	14	4	7
ENSMUST00000153534.1	ENSMUSG00000050132	Sarm1	sterile alpha and HEAT/Armadillo motif containing 1 [Source:MGI Symbol;Acc:MGI:2136419]	2497	217.166666666666	144.166666666666	147.75	172	157.625	6	6	4	3	8
ENSMUST00000061174.6	ENSMUSG00000050132	Sarm1	sterile alpha and HEAT/Armadillo motif containing 1 [Source:MGI Symbol;Acc:MGI:2136419]	4083	153.588235294117	145.75	145.533333333333	136.222222222222	184.75	17	28	15	18	20
ENSMUST00000170674.1	ENSMUSG00000050132	Sarm1	sterile alpha and HEAT/Armadillo motif containing 1 [Source:MGI Symbol;Acc:MGI:2136419]	689	NA	NA	NA	NA	NA	0	0	0	0	0
ENSMUST00000130955.1	ENSMUSG00000050132	Sarm1	sterile alpha and HEAT/Armadillo motif containing 1 [Source:MGI Symbol;Acc:MGI:2136419]	702	NA	NA	NA	NA	NA	0	0	0	0	0
ENSMUST00000178678.7	ENSMUSG00000024534	Sncaip	synuclein, alpha interacting protein (synphilin) [Source:MGI Symbol;Acc:MGI:1915097]	3724	NA	NA	232	NA	231	0	0	1	0	2
ENSMUST00000025413.13	ENSMUSG00000024534	Sncaip	synuclein, alpha interacting protein (synphilin) [Source:MGI Symbol;Acc:MGI:1915097]	3632	204.333333333333	125.333333333333	NA	226	199.5	3	3	0	2	2
ENSMUST00000163742.8	ENSMUSG00000024534	Sncaip	synuclein, alpha interacting protein (synphilin) [Source:MGI Symbol;Acc:MGI:1915097]	3272	NA	NA	NA	NA	NA	0	0	0	0	0
ENSMUST00000178011.7	ENSMUSG00000024534	Sncaip	synuclein, alpha interacting protein (synphilin) [Source:MGI Symbol;Acc:MGI:1915097]	3433	162	NA	NA	NA	89	1	0	0	0	1
ENSMUST00000179038.1	ENSMUSG00000024534	Sncaip	synuclein, alpha interacting protein (synphilin) [Source:MGI Symbol;Acc:MGI:1915097]	404	NA	NA	NA	NA	NA	0	0	0	0	0
ENSMUST00000177861.7	ENSMUSG00000024534	Sncaip	synuclein, alpha interacting protein (synphilin) [Source:MGI Symbol;Acc:MGI:1915097]	1905	NA	NA	NA	NA	NA	0	0	0	0	0
ENSMUST00000178883.7	ENSMUSG00000024534	Sncaip	synuclein, alpha interacting protein (synphilin) [Source:MGI Symbol;Acc:MGI:1915097]	2383	271	NA	NA	NA	NA	1	0	0	0	0
ENSMUST00000180259.7	ENSMUSG00000024534	Sncaip	synuclein, alpha interacting protein (synphilin) [Source:MGI Symbol;Acc:MGI:1915097]	2312	159	NA	44	NA	102	1	0	1	0	1
ENSMUST00000179625.7	ENSMUSG00000024534	Sncaip	synuclein, alpha interacting protein (synphilin) [Source:MGI Symbol;Acc:MGI:1915097]	2568	NA	NA	NA	NA	NA	0	0	0	0	0
ENSMUST00000179689.1	ENSMUSG00000024534	Sncaip	synuclein, alpha interacting protein (synphilin) [Source:MGI Symbol;Acc:MGI:1915097]	1512	NA	NA	NA	NA	NA	0	0	0	0	0
ENSMUST00000115410.8	ENSMUSG00000024534	Sncaip	synuclein, alpha interacting protein (synphilin) [Source:MGI Symbol;Acc:MGI:1915097]	3585	NA	NA	45	116	NA	0	0	1	1	0
ENSMUST00000023116.6	ENSMUSG00000022477	Aco2	aconitase 2, mitochondrial [Source:MGI Symbol;Acc:MGI:87880]	2918	120.415470494417	126.315638450502	119.691506410256	119.276073619631	124.956006768189	1254	1394	1248	815	1182
ENSMUST00000135198.1	ENSMUSG00000022477	Aco2	aconitase 2, mitochondrial [Source:MGI Symbol;Acc:MGI:87880]	456	72	NA	NA	NA	39	1	0	0	0	1
ENSMUST00000157003.7	ENSMUSG00000022477	Aco2	aconitase 2, mitochondrial [Source:MGI Symbol;Acc:MGI:87880]	351	87	91	74.6666666666666	64.6666666666666	98.5	4	4	6	3	4
ENSMUST00000229068.1	ENSMUSG00000022477	Aco2	aconitase 2, mitochondrial [Source:MGI Symbol;Acc:MGI:87880]	589	NA	NA	NA	NA	NA	0	0	0	0	0
ENSMUST00000231091.1	ENSMUSG00000022477	Aco2	aconitase 2, mitochondrial [Source:MGI Symbol;Acc:MGI:87880]	438	NA	NA	NA	NA	NA	0	0	0	0	0
ENSMUST00000231075.1	ENSMUSG00000022477	Aco2	aconitase 2, mitochondrial [Source:MGI Symbol;Acc:MGI:87880]	712	NA	NA	NA	NA	NA	0	0	0	0	0
ENSMUST00000126352.7	ENSMUSG00000022477	Aco2	aconitase 2, mitochondrial [Source:MGI Symbol;Acc:MGI:87880]	782	NA	NA	NA	NA	NA	0	0	0	0	0
ENSMUST00000155704.1	ENSMUSG00000022477	Aco2	aconitase 2, mitochondrial [Source:MGI Symbol;Acc:MGI:87880]	653	NA	NA	NA	NA	NA	0	0	0	0	0
ENSMUST00000144324.1	ENSMUSG00000022477	Aco2	aconitase 2, mitochondrial [Source:MGI Symbol;Acc:MGI:87880]	703	55.5	NA	NA	NA	NA	2	0	0	0	0
ENSMUST00000221929.1	ENSMUSG00000021176	Efcab11	EF-hand calcium binding domain 11 [Source:MGI Symbol;Acc:MGI:1926017]	635	NA	NA	NA	NA	NA	0	0	0	0	0
ENSMUST00000046485.4	ENSMUSG00000021176	Efcab11	EF-hand calcium binding domain 11 [Source:MGI Symbol;Acc:MGI:1926017]	2068	NA	136	157	NA	NA	0	1	1	0	0
ENSMUST00000223114.1	ENSMUSG00000021176	Efcab11	EF-hand calcium binding domain 11 [Source:MGI Symbol;Acc:MGI:1926017]	1122	NA	NA	NA	154	NA	0	0	0	1	0
ENSMUST00000220875.1	ENSMUSG00000021176	Efcab11	EF-hand calcium binding domain 11 [Source:MGI Symbol;Acc:MGI:1926017]	713	NA	NA	NA	NA	NA	0	0	0	0	0
ENSMUST00000221801.1	ENSMUSG00000021176	Efcab11	EF-hand calcium binding domain 11 [Source:MGI Symbol;Acc:MGI:1926017]	3131	266	NA	261	75.5	NA	1	0	2	2	0
ENSMUST00000223108.1	ENSMUSG00000021176	Efcab11	EF-hand calcium binding domain 11 [Source:MGI Symbol;Acc:MGI:1926017]	667	NA	NA	NA	NA	NA	0	0	0	0	0
ENSMUST00000221197.1	ENSMUSG00000021176	Efcab11	EF-hand calcium binding domain 11 [Source:MGI Symbol;Acc:MGI:1926017]	404	NA	NA	NA	NA	NA	0	0	0	0	0
ENSMUST00000202306.1	ENSMUSG00000024472	Dcp2	decapping mRNA 2 [Source:MGI Symbol;Acc:MGI:1917890]	398	87.8	40.5	60.6666666666666	160.5	93.8	5	2	3	2	5
ENSMUST00000025350.9	ENSMUSG00000024472	Dcp2	decapping mRNA 2 [Source:MGI Symbol;Acc:MGI:1917890]	8616	165.458333333333	150.202702702702	148.478260869565	167.46875	161.25352112676	72	74	69	64	71
ENSMUST00000100369.3	ENSMUSG00000075510	Fam187a	family with sequence similarity 187, member A [Source:MGI Symbol;Acc:MGI:1914034]	1563	213.5	NA	NA	NA	99	2	0	0	0	1
ENSMUST00000037607.10	ENSMUSG00000028284	Map3k7	mitogen-activated protein kinase kinase kinase 7 [Source:MGI Symbol;Acc:MGI:1346877]	5773	179.444444444444	184.125	197.428571428571	143.777777777777	208.8	18	24	14	9	10
ENSMUST00000080933.12	ENSMUSG00000028284	Map3k7	mitogen-activated protein kinase kinase kinase 7 [Source:MGI Symbol;Acc:MGI:1346877]	5669	190.243902439024	179.228571428571	148.818181818181	151	175.484848484848	41	35	33	19	33
ENSMUST00000108183.7	ENSMUSG00000028284	Map3k7	mitogen-activated protein kinase kinase kinase 7 [Source:MGI Symbol;Acc:MGI:1346877]	5416	190.7	201.875	164.444444444444	80.6666666666666	145.571428571428	10	8	9	3	7
ENSMUST00000108184.2	ENSMUSG00000028284	Map3k7	mitogen-activated protein kinase kinase kinase 7 [Source:MGI Symbol;Acc:MGI:1346877]	5491	126.5	187.333333333333	123.444444444444	120.888888888888	227.2	10	6	9	9	5
ENSMUST00000131114.7	ENSMUSG00000028284	Map3k7	mitogen-activated protein kinase kinase kinase 7 [Source:MGI Symbol;Acc:MGI:1346877]	612	NA	NA	NA	NA	NA	0	0	0	0	0
ENSMUST00000143138.1	ENSMUSG00000028284	Map3k7	mitogen-activated protein kinase kinase kinase 7 [Source:MGI Symbol;Acc:MGI:1346877]	538	NA	NA	NA	NA	NA	0	0	0	0	0
ENSMUST00000147462.7	ENSMUSG00000028284	Map3k7	mitogen-activated protein kinase kinase kinase 7 [Source:MGI Symbol;Acc:MGI:1346877]	821	NA	NA	NA	NA	NA	0	0	0	0	0
ENSMUST00000126632.7	ENSMUSG00000028284	Map3k7	mitogen-activated protein kinase kinase kinase 7 [Source:MGI Symbol;Acc:MGI:1346877]	865	NA	NA	NA	NA	NA	0	0	0	0	0
ENSMUST00000131310.1	ENSMUSG00000028284	Map3k7	mitogen-activated protein kinase kinase kinase 7 [Source:MGI Symbol;Acc:MGI:1346877]	590	NA	NA	NA	NA	NA	0	0	0	0	0
ENSMUST00000173322.7	ENSMUSG00000092243	Gm7030	predicted gene 7030 [Source:MGI Symbol;Acc:MGI:3647514]	913	NA	NA	NA	NA	NA	0	0	0	0	0
ENSMUST00000172968.1	ENSMUSG00000092243	Gm7030	predicted gene 7030 [Source:MGI Symbol;Acc:MGI:3647514]	899	NA	NA	NA	NA	NA	0	0	0	0	0
ENSMUST00000046131.15	ENSMUSG00000092243	Gm7030	predicted gene 7030 [Source:MGI Symbol;Acc:MGI:3647514]	913	NA	NA	NA	NA	NA	0	0	0	0	0
ENSMUST00000058092.7	ENSMUSG00000050276	Mrgprg	MAS-related GPR, member G [Source:MGI Symbol;Acc:MGI:3033145]	1821	NA	NA	NA	NA	NA	0	0	0	0	0
ENSMUST00000208986.1	ENSMUSG00000050276	Mrgprg	MAS-related GPR, member G [Source:MGI Symbol;Acc:MGI:3033145]	671	NA	NA	NA	NA	NA	0	0	0	0	0
ENSMUST00000094715.7	ENSMUSG00000068082	Grxcr1	glutaredoxin, cysteine rich 1 [Source:MGI Symbol;Acc:MGI:3577767]	1071	NA	NA	NA	NA	NA	0	0	0	0	0
ENSMUST00000230349.1	ENSMUSG00000036678	Aaas	achalasia, adrenocortical insufficiency, alacrimia [Source:MGI Symbol;Acc:MGI:2443767]	473	NA	NA	NA	NA	NA	0	0	0	0	0
ENSMUST00000231061.1	ENSMUSG00000036678	Aaas	achalasia, adrenocortical insufficiency, alacrimia [Source:MGI Symbol;Acc:MGI:2443767]	1025	NA	NA	NA	NA	NA	0	0	0	0	0
ENSMUST00000229315.1	ENSMUSG00000036678	Aaas	achalasia, adrenocortical insufficiency, alacrimia [Source:MGI Symbol;Acc:MGI:2443767]	1021	NA	NA	NA	NA	NA	0	0	0	0	0
ENSMUST00000230710.1	ENSMUSG00000036678	Aaas	achalasia, adrenocortical insufficiency, alacrimia [Source:MGI Symbol;Acc:MGI:2443767]	959	NA	NA	NA	NA	NA	0	0	0	0	0
ENSMUST00000230812.1	ENSMUSG00000036678	Aaas	achalasia, adrenocortical insufficiency, alacrimia [Source:MGI Symbol;Acc:MGI:2443767]	2230	133.928571428571	120	116.666666666666	110.5	139.4	14	1	3	4	5
ENSMUST00000041208.8	ENSMUSG00000036678	Aaas	achalasia, adrenocortical insufficiency, alacrimia [Source:MGI Symbol;Acc:MGI:2443767]	1811	160.827586206896	146.833333333333	164.51724137931	144.347826086956	163.608695652173	29	30	29	23	23
ENSMUST00000231099.1	ENSMUSG00000036678	Aaas	achalasia, adrenocortical insufficiency, alacrimia [Source:MGI Symbol;Acc:MGI:2443767]	398	89	NA	NA	NA	NA	1	0	0	0	0
ENSMUST00000230406.1	ENSMUSG00000036678	Aaas	achalasia, adrenocortical insufficiency, alacrimia [Source:MGI Symbol;Acc:MGI:2443767]	697	107	NA	NA	NA	NA	1	0	0	0	0
ENSMUST00000229589.1	ENSMUSG00000036678	Aaas	achalasia, adrenocortical insufficiency, alacrimia [Source:MGI Symbol;Acc:MGI:2443767]	1814	261	75	NA	309	NA	1	1	0	1	0
ENSMUST00000228959.1	ENSMUSG00000036678	Aaas	achalasia, adrenocortical insufficiency, alacrimia [Source:MGI Symbol;Acc:MGI:2443767]	314	NA	NA	NA	NA	NA	0	0	0	0	0
ENSMUST00000230239.1	ENSMUSG00000036678	Aaas	achalasia, adrenocortical insufficiency, alacrimia [Source:MGI Symbol;Acc:MGI:2443767]	440	NA	NA	NA	NA	NA	0	0	0	0	0
ENSMUST00000230481.1	ENSMUSG00000036678	Aaas	achalasia, adrenocortical insufficiency, alacrimia [Source:MGI Symbol;Acc:MGI:2443767]	898	NA	NA	NA	NA	NA	0	0	0	0	0
ENSMUST00000229900.1	ENSMUSG00000036678	Aaas	achalasia, adrenocortical insufficiency, alacrimia [Source:MGI Symbol;Acc:MGI:2443767]	781	NA	NA	NA	NA	NA	0	0	0	0	0
ENSMUST00000232810.1	ENSMUSG00000117148	Vmn1r229	vomeronasal 1 receptor 229 [Source:MGI Symbol;Acc:MGI:2159615]	9467	234.666666666666	NA	199	NA	NA	3	0	1	0	0
ENSMUST00000233712.1	ENSMUSG00000117148	Vmn1r229	vomeronasal 1 receptor 229 [Source:MGI Symbol;Acc:MGI:2159615]	9510	208	172.333333333333	163	137.5	158	1	3	1	2	1
ENSMUST00000232852.1	ENSMUSG00000117148	Vmn1r229	vomeronasal 1 receptor 229 [Source:MGI Symbol;Acc:MGI:2159615]	9451	133	304	260	NA	118.5	3	1	1	0	2
ENSMUST00000233490.1	ENSMUSG00000117148	Vmn1r229	vomeronasal 1 receptor 229 [Source:MGI Symbol;Acc:MGI:2159615]	12010	218	NA	247.5	186	183	1	0	2	2	1
ENSMUST00000076759.2	ENSMUSG00000117148	Vmn1r229	vomeronasal 1 receptor 229 [Source:MGI Symbol;Acc:MGI:2159615]	921	NA	NA	NA	NA	NA	0	0	0	0	0
ENSMUST00000048966.6	ENSMUSG00000041852	Tcf20	transcription factor 20 [Source:MGI Symbol;Acc:MGI:108399]	7417	145.742424242424	150.493670886075	149.371794871794	140.714285714285	129.51724137931	66	79	78	56	58
ENSMUST00000109510.9	ENSMUSG00000041852	Tcf20	transcription factor 20 [Source:MGI Symbol;Acc:MGI:108399]	7323	146.523809523809	122.08	117.470588235294	137.384615384615	129.473684210526	21	25	17	13	19
ENSMUST00000229547.1	ENSMUSG00000041852	Tcf20	transcription factor 20 [Source:MGI Symbol;Acc:MGI:108399]	630	NA	NA	NA	NA	NA	0	0	0	0	0
ENSMUST00000230403.1	ENSMUSG00000041852	Tcf20	transcription factor 20 [Source:MGI Symbol;Acc:MGI:108399]	687	NA	NA	NA	NA	NA	0	0	0	0	0
ENSMUST00000229439.1	ENSMUSG00000041852	Tcf20	transcription factor 20 [Source:MGI Symbol;Acc:MGI:108399]	412	NA	NA	NA	NA	NA	0	0	0	0	0
ENSMUST00000029515.4	ENSMUSG00000027907	S100a11	S100 calcium binding protein A11 [Source:MGI Symbol;Acc:MGI:1338798]	511	108.65625	106.225806451612	111.595238095238	116.793103448275	137.433333333333	32	62	42	29	30
ENSMUST00000215226.1	ENSMUSG00000047702	Olfr1388	olfactory receptor 1388 [Source:MGI Symbol;Acc:MGI:3031222]	3034	187	NA	NA	NA	NA	1	0	0	0	0
ENSMUST00000055584.1	ENSMUSG00000047702	Olfr1388	olfactory receptor 1388 [Source:MGI Symbol;Acc:MGI:3031222]	936	NA	NA	NA	NA	NA	0	0	0	0	0
ENSMUST00000000329.8	ENSMUSG00000000320	Alox12	arachidonate 12-lipoxygenase [Source:MGI Symbol;Acc:MGI:87998]	3001	83	162	150.333333333333	NA	257	1	4	3	0	1
ENSMUST00000108574.2	ENSMUSG00000000320	Alox12	arachidonate 12-lipoxygenase [Source:MGI Symbol;Acc:MGI:87998]	2314	NA	162.5	NA	NA	NA	0	2	0	0	0
ENSMUST00000037275.5	ENSMUSG00000034303	Ccdc15	coiled-coil domain containing 15 [Source:MGI Symbol;Acc:MGI:2444488]	3525	NA	170	75	99	NA	0	3	1	1	0
ENSMUST00000213633.1	ENSMUSG00000034303	Ccdc15	coiled-coil domain containing 15 [Source:MGI Symbol;Acc:MGI:2444488]	3331	NA	199	174	NA	NA	0	1	1	0	0
ENSMUST00000216060.1	ENSMUSG00000034303	Ccdc15	coiled-coil domain containing 15 [Source:MGI Symbol;Acc:MGI:2444488]	3180	NA	NA	NA	NA	NA	0	0	0	0	0
ENSMUST00000215116.1	ENSMUSG00000034303	Ccdc15	coiled-coil domain containing 15 [Source:MGI Symbol;Acc:MGI:2444488]	969	NA	NA	NA	NA	NA	0	0	0	0	0
ENSMUST00000216042.1	ENSMUSG00000034303	Ccdc15	coiled-coil domain containing 15 [Source:MGI Symbol;Acc:MGI:2444488]	1669	NA	NA	NA	NA	NA	0	0	0	0	0
ENSMUST00000217238.1	ENSMUSG00000034303	Ccdc15	coiled-coil domain containing 15 [Source:MGI Symbol;Acc:MGI:2444488]	1747	323	NA	356	NA	NA	1	0	1	0	0
ENSMUST00000173128.1	ENSMUSG00000092277	Gm19684	predicted gene, 19684 [Source:MGI Symbol;Acc:MGI:5011869]	1611	NA	NA	NA	NA	NA	0	0	0	0	0
ENSMUST00000067444.9	ENSMUSG00000020932	Gfap	glial fibrillary acidic protein [Source:MGI Symbol;Acc:MGI:95697]	2648	124.762057877813	130.501577287066	124.670967741935	130.013513513513	136.885057471264	311	317	310	222	261
ENSMUST00000127909.1	ENSMUSG00000020932	Gfap	glial fibrillary acidic protein [Source:MGI Symbol;Acc:MGI:95697]	356	NA	NA	NA	NA	NA	0	0	0	0	0
ENSMUST00000077902.4	ENSMUSG00000020932	Gfap	glial fibrillary acidic protein [Source:MGI Symbol;Acc:MGI:95697]	2600	111.8	138.32	114.115384615384	101.526315789473	123.95652173913	15	25	26	19	23
ENSMUST00000105785.8	ENSMUSG00000006219	Fblim1	filamin binding LIM protein 1 [Source:MGI Symbol;Acc:MGI:1921452]	3091	182	181	NA	NA	207.5	2	3	0	0	2
ENSMUST00000133874.1	ENSMUSG00000006219	Fblim1	filamin binding LIM protein 1 [Source:MGI Symbol;Acc:MGI:1921452]	414	NA	NA	NA	NA	NA	0	0	0	0	0
ENSMUST00000136831.1	ENSMUSG00000006219	Fblim1	filamin binding LIM protein 1 [Source:MGI Symbol;Acc:MGI:1921452]	375	NA	NA	NA	NA	NA	0	0	0	0	0
ENSMUST00000123150.1	ENSMUSG00000006219	Fblim1	filamin binding LIM protein 1 [Source:MGI Symbol;Acc:MGI:1921452]	352	NA	NA	NA	NA	NA	0	0	0	0	0
ENSMUST00000131317.7	ENSMUSG00000006219	Fblim1	filamin binding LIM protein 1 [Source:MGI Symbol;Acc:MGI:1921452]	550	NA	NA	NA	NA	NA	0	0	0	0	0
ENSMUST00000127455.7	ENSMUSG00000006219	Fblim1	filamin binding LIM protein 1 [Source:MGI Symbol;Acc:MGI:1921452]	373	NA	NA	NA	NA	NA	0	0	0	0	0
ENSMUST00000129602.7	ENSMUSG00000006219	Fblim1	filamin binding LIM protein 1 [Source:MGI Symbol;Acc:MGI:1921452]	480	NA	NA	NA	NA	NA	0	0	0	0	0
ENSMUST00000147785.7	ENSMUSG00000006219	Fblim1	filamin binding LIM protein 1 [Source:MGI Symbol;Acc:MGI:1921452]	536	NA	NA	NA	NA	NA	0	0	0	0	0
ENSMUST00000137491.1	ENSMUSG00000006219	Fblim1	filamin binding LIM protein 1 [Source:MGI Symbol;Acc:MGI:1921452]	907	NA	NA	NA	NA	NA	0	0	0	0	0
ENSMUST00000147764.7	ENSMUSG00000006219	Fblim1	filamin binding LIM protein 1 [Source:MGI Symbol;Acc:MGI:1921452]	593	NA	NA	NA	NA	NA	0	0	0	0	0
ENSMUST00000153189.7	ENSMUSG00000006219	Fblim1	filamin binding LIM protein 1 [Source:MGI Symbol;Acc:MGI:1921452]	764	NA	NA	NA	NA	NA	0	0	0	0	0
ENSMUST00000130181.7	ENSMUSG00000006219	Fblim1	filamin binding LIM protein 1 [Source:MGI Symbol;Acc:MGI:1921452]	956	NA	NA	NA	NA	NA	0	0	0	0	0
ENSMUST00000105784.7	ENSMUSG00000006219	Fblim1	filamin binding LIM protein 1 [Source:MGI Symbol;Acc:MGI:1921452]	3036	NA	175.5	164	NA	NA	0	2	2	0	0
ENSMUST00000141518.7	ENSMUSG00000006219	Fblim1	filamin binding LIM protein 1 [Source:MGI Symbol;Acc:MGI:1921452]	689	NA	NA	NA	NA	NA	0	0	0	0	0
ENSMUST00000006381.10	ENSMUSG00000006219	Fblim1	filamin binding LIM protein 1 [Source:MGI Symbol;Acc:MGI:1921452]	3101	NA	181	60.75	60	223	0	1	4	1	1
ENSMUST00000019962.14	ENSMUSG00000019818	Cd164	CD164 antigen [Source:MGI Symbol;Acc:MGI:1859568]	2922	150.621495327102	152.739795918367	161.41450777202	149.947368421052	147.412935323383	214	196	193	133	201
ENSMUST00000187279.6	ENSMUSG00000019818	Cd164	CD164 antigen [Source:MGI Symbol;Acc:MGI:1859568]	1528	NA	NA	NA	NA	NA	0	0	0	0	0
ENSMUST00000189300.1	ENSMUSG00000019818	Cd164	CD164 antigen [Source:MGI Symbol;Acc:MGI:1859568]	692	NA	189	NA	NA	NA	0	1	0	0	0
ENSMUST00000186388.1	ENSMUSG00000019818	Cd164	CD164 antigen [Source:MGI Symbol;Acc:MGI:1859568]	592	NA	NA	NA	NA	NA	0	0	0	0	0
ENSMUST00000057324.3	ENSMUSG00000047414	Flrt2	fibronectin leucine rich transmembrane protein 2 [Source:MGI Symbol;Acc:MGI:3603594]	7099	137.342281879194	154.518248175182	157.148148148148	137	144.216	149	137	108	86	125
ENSMUST00000110117.1	ENSMUSG00000047414	Flrt2	fibronectin leucine rich transmembrane protein 2 [Source:MGI Symbol;Acc:MGI:3603594]	3223	12.5	84	43	226	4	2	3	1	1	1
ENSMUST00000135395.7	ENSMUSG00000032249	Anp32a	acidic (leucine-rich) nuclear phosphoprotein 32 family, member A [Source:MGI Symbol;Acc:MGI:108447]	924	104	69.2	125	23	110.75	2	5	1	1	4
ENSMUST00000156461.1	ENSMUSG00000032249	Anp32a	acidic (leucine-rich) nuclear phosphoprotein 32 family, member A [Source:MGI Symbol;Acc:MGI:108447]	412	1	NA	NA	NA	NA	1	0	0	0	0
ENSMUST00000136603.7	ENSMUSG00000032249	Anp32a	acidic (leucine-rich) nuclear phosphoprotein 32 family, member A [Source:MGI Symbol;Acc:MGI:108447]	871	1	NA	NA	NA	NA	1	0	0	0	0
ENSMUST00000126451.7	ENSMUSG00000032249	Anp32a	acidic (leucine-rich) nuclear phosphoprotein 32 family, member A [Source:MGI Symbol;Acc:MGI:108447]	617	3	NA	9	NA	NA	1	0	1	0	0
ENSMUST00000129026.7	ENSMUSG00000032249	Anp32a	acidic (leucine-rich) nuclear phosphoprotein 32 family, member A [Source:MGI Symbol;Acc:MGI:108447]	630	NA	NA	NA	NA	3	0	0	0	0	1
ENSMUST00000141277.7	ENSMUSG00000032249	Anp32a	acidic (leucine-rich) nuclear phosphoprotein 32 family, member A [Source:MGI Symbol;Acc:MGI:108447]	535	NA	134	108	155	81	0	1	1	3	3
ENSMUST00000145679.1	ENSMUSG00000032249	Anp32a	acidic (leucine-rich) nuclear phosphoprotein 32 family, member A [Source:MGI Symbol;Acc:MGI:108447]	629	151	NA	NA	NA	NA	1	0	0	0	0
ENSMUST00000085519.12	ENSMUSG00000032249	Anp32a	acidic (leucine-rich) nuclear phosphoprotein 32 family, member A [Source:MGI Symbol;Acc:MGI:108447]	2113	127.860169491525	127.75	128.217391304347	115.591715976331	127.940639269406	236	268	230	169	219
ENSMUST00000128636.7	ENSMUSG00000032249	Anp32a	acidic (leucine-rich) nuclear phosphoprotein 32 family, member A [Source:MGI Symbol;Acc:MGI:108447]	640	129.333333333333	97.6666666666666	125.857142857142	89.5714285714285	92.2777777777777	12	12	7	7	18
ENSMUST00000138226.7	ENSMUSG00000032249	Anp32a	acidic (leucine-rich) nuclear phosphoprotein 32 family, member A [Source:MGI Symbol;Acc:MGI:108447]	835	NA	NA	NA	NA	NA	0	0	0	0	0
ENSMUST00000222197.1	ENSMUSG00000021392	Nol8	nucleolar protein 8 [Source:MGI Symbol;Acc:MGI:1918180]	4368	NA	NA	202	NA	NA	0	0	1	0	0
ENSMUST00000221083.1	ENSMUSG00000021392	Nol8	nucleolar protein 8 [Source:MGI Symbol;Acc:MGI:1918180]	745	NA	NA	NA	NA	NA	0	0	0	0	0
ENSMUST00000223467.1	ENSMUSG00000021392	Nol8	nucleolar protein 8 [Source:MGI Symbol;Acc:MGI:1918180]	4765	139	238.166666666666	102	135.25	127.666666666666	6	6	5	4	3
ENSMUST00000223264.1	ENSMUSG00000021392	Nol8	nucleolar protein 8 [Source:MGI Symbol;Acc:MGI:1918180]	363	NA	NA	NA	NA	NA	0	0	0	0	0
ENSMUST00000221142.1	ENSMUSG00000021392	Nol8	nucleolar protein 8 [Source:MGI Symbol;Acc:MGI:1918180]	4381	179.8	155.285714285714	163.791666666666	147.714285714285	187.294117647058	20	28	24	14	17
ENSMUST00000222333.1	ENSMUSG00000021392	Nol8	nucleolar protein 8 [Source:MGI Symbol;Acc:MGI:1918180]	600	NA	NA	NA	NA	NA	0	0	0	0	0
ENSMUST00000223346.1	ENSMUSG00000021392	Nol8	nucleolar protein 8 [Source:MGI Symbol;Acc:MGI:1918180]	3239	NA	NA	NA	NA	NA	0	0	0	0	0
ENSMUST00000221328.1	ENSMUSG00000021392	Nol8	nucleolar protein 8 [Source:MGI Symbol;Acc:MGI:1918180]	2424	242	245.666666666666	247	293.5	185	2	3	1	2	1
ENSMUST00000021824.7	ENSMUSG00000021392	Nol8	nucleolar protein 8 [Source:MGI Symbol;Acc:MGI:1918180]	4242	157.428571428571	186.75	109.833333333333	186.714285714285	150.333333333333	7	12	6	7	9
ENSMUST00000169686.2	ENSMUSG00000091350	Vmn2r92	vomeronasal 2, receptor 92 [Source:MGI Symbol;Acc:MGI:3761352]	6334	140.5	102	94	NA	86	2	1	1	0	2
ENSMUST00000234941.1	ENSMUSG00000024142	Mlst8	MTOR associated protein, LST8 homolog (S. cerevisiae) [Source:MGI Symbol;Acc:MGI:1929514]	3223	147.294117647058	169.923076923076	155	158.3125	173.176470588235	17	26	13	16	17
ENSMUST00000179163.2	ENSMUSG00000024142	Mlst8	MTOR associated protein, LST8 homolog (S. cerevisiae) [Source:MGI Symbol;Acc:MGI:1929514]	3340	163.21875	157.205882352941	173.307692307692	196.90909090909	147.115384615384	32	34	26	22	26
ENSMUST00000070888.13	ENSMUSG00000024142	Mlst8	MTOR associated protein, LST8 homolog (S. cerevisiae) [Source:MGI Symbol;Acc:MGI:1929514]	3358	208.785714285714	165.333333333333	156.272727272727	178.125	159.058823529411	14	21	11	8	17
ENSMUST00000234686.1	ENSMUSG00000024142	Mlst8	MTOR associated protein, LST8 homolog (S. cerevisiae) [Source:MGI Symbol;Acc:MGI:1929514]	3855	207.666666666666	230.5	159.833333333333	NA	148.666666666666	3	4	6	0	6
ENSMUST00000234543.1	ENSMUSG00000024142	Mlst8	MTOR associated protein, LST8 homolog (S. cerevisiae) [Source:MGI Symbol;Acc:MGI:1929514]	3127	208.5	174	206	231.5	304	2	4	4	2	1
ENSMUST00000234335.1	ENSMUSG00000024142	Mlst8	MTOR associated protein, LST8 homolog (S. cerevisiae) [Source:MGI Symbol;Acc:MGI:1929514]	1574	NA	131	NA	NA	NA	0	1	0	0	0
ENSMUST00000234147.1	ENSMUSG00000024142	Mlst8	MTOR associated protein, LST8 homolog (S. cerevisiae) [Source:MGI Symbol;Acc:MGI:1929514]	850	NA	NA	NA	NA	NA	0	0	0	0	0
ENSMUST00000234892.1	ENSMUSG00000024142	Mlst8	MTOR associated protein, LST8 homolog (S. cerevisiae) [Source:MGI Symbol;Acc:MGI:1929514]	519	NA	NA	NA	NA	NA	0	0	0	0	0
ENSMUST00000234516.1	ENSMUSG00000024142	Mlst8	MTOR associated protein, LST8 homolog (S. cerevisiae) [Source:MGI Symbol;Acc:MGI:1929514]	786	NA	NA	NA	NA	NA	0	0	0	0	0
ENSMUST00000234032.1	ENSMUSG00000024142	Mlst8	MTOR associated protein, LST8 homolog (S. cerevisiae) [Source:MGI Symbol;Acc:MGI:1929514]	668	NA	NA	NA	NA	NA	0	0	0	0	0
ENSMUST00000136628.1	ENSMUSG00000074754	Smim26	small integral membrane protein 26 [Source:MGI Symbol;Acc:MGI:2685407]	471	111.949438202247	117.76	127.55294117647	120.60465116279	126.452631578947	178	200	170	129	190
ENSMUST00000054308.12	ENSMUSG00000035293	G2e3	G2/M-phase specific E3 ubiquitin ligase [Source:MGI Symbol;Acc:MGI:2444298]	6803	202.5	218.791666666666	195.111111111111	188.2	215.91304347826	26	24	18	10	23
ENSMUST00000119211.7	ENSMUSG00000035293	G2e3	G2/M-phase specific E3 ubiquitin ligase [Source:MGI Symbol;Acc:MGI:2444298]	2926	NA	NA	NA	NA	NA	0	0	0	0	0
ENSMUST00000121521.1	ENSMUSG00000035293	G2e3	G2/M-phase specific E3 ubiquitin ligase [Source:MGI Symbol;Acc:MGI:2444298]	2594	NA	NA	NA	NA	NA	0	0	0	0	0
ENSMUST00000144767.1	ENSMUSG00000035293	G2e3	G2/M-phase specific E3 ubiquitin ligase [Source:MGI Symbol;Acc:MGI:2444298]	616	NA	NA	NA	NA	NA	0	0	0	0	0
ENSMUST00000152236.1	ENSMUSG00000035293	G2e3	G2/M-phase specific E3 ubiquitin ligase [Source:MGI Symbol;Acc:MGI:2444298]	2724	NA	NA	209	NA	NA	0	0	1	0	0
ENSMUST00000038876.12	ENSMUSG00000040212	Emp3	epithelial membrane protein 3 [Source:MGI Symbol;Acc:MGI:1098729]	736	103.727272727272	112.882352941176	101.785714285714	87.7272727272727	114.333333333333	22	17	14	11	12
ENSMUST00000164119.2	ENSMUSG00000040212	Emp3	epithelial membrane protein 3 [Source:MGI Symbol;Acc:MGI:1098729]	784	138.75	189	NA	NA	59	4	1	0	0	1
ENSMUST00000210297.1	ENSMUSG00000040212	Emp3	epithelial membrane protein 3 [Source:MGI Symbol;Acc:MGI:1098729]	601	NA	96.5	30	NA	NA	0	2	1	0	0
ENSMUST00000210939.1	ENSMUSG00000040212	Emp3	epithelial membrane protein 3 [Source:MGI Symbol;Acc:MGI:1098729]	380	NA	NA	NA	NA	NA	0	0	0	0	0
ENSMUST00000210937.1	ENSMUSG00000040212	Emp3	epithelial membrane protein 3 [Source:MGI Symbol;Acc:MGI:1098729]	380	NA	NA	NA	NA	NA	0	0	0	0	0
ENSMUST00000098281.3	ENSMUSG00000074006	Omp	olfactory marker protein [Source:MGI Symbol;Acc:MGI:97436]	2144	44	88.25	NA	NA	NA	1	4	0	0	0
ENSMUST00000040971.13	ENSMUSG00000035547	Capn5	calpain 5 [Source:MGI Symbol;Acc:MGI:1100859]	4498	153.65	169.597938144329	151.225490196078	135.36	136.671875	100	97	102	50	64
ENSMUST00000107112.1	ENSMUSG00000035547	Capn5	calpain 5 [Source:MGI Symbol;Acc:MGI:1100859]	2232	NA	NA	NA	NA	NA	0	0	0	0	0
ENSMUST00000134638.1	ENSMUSG00000035547	Capn5	calpain 5 [Source:MGI Symbol;Acc:MGI:1100859]	668	NA	NA	NA	NA	NA	0	0	0	0	0
ENSMUST00000155056.1	ENSMUSG00000035547	Capn5	calpain 5 [Source:MGI Symbol;Acc:MGI:1100859]	382	NA	NA	NA	NA	NA	0	0	0	0	0
ENSMUST00000129430.1	ENSMUSG00000035547	Capn5	calpain 5 [Source:MGI Symbol;Acc:MGI:1100859]	440	NA	NA	NA	NA	NA	0	0	0	0	0
ENSMUST00000194462.5	ENSMUSG00000027737	Slc7a11	solute carrier family 7 (cationic amino acid transporter, y+ system), member 11 [Source:MGI Symbol;Acc:MGI:1347355]	2419	NA	NA	NA	NA	NA	0	0	0	0	0
ENSMUST00000029297.5	ENSMUSG00000027737	Slc7a11	solute carrier family 7 (cationic amino acid transporter, y+ system), member 11 [Source:MGI Symbol;Acc:MGI:1347355]	9223	157.777777777777	165.910447761194	146.318181818181	148.657894736842	151.311475409836	72	67	44	38	61
ENSMUST00000192564.1	ENSMUSG00000027737	Slc7a11	solute carrier family 7 (cationic amino acid transporter, y+ system), member 11 [Source:MGI Symbol;Acc:MGI:1347355]	481	NA	NA	NA	NA	NA	0	0	0	0	0
ENSMUST00000142932.2	ENSMUSG00000027737	Slc7a11	solute carrier family 7 (cationic amino acid transporter, y+ system), member 11 [Source:MGI Symbol;Acc:MGI:1347355]	3162	186.333333333333	107.5	NA	207	NA	3	4	0	1	0
ENSMUST00000193838.1	ENSMUSG00000027737	Slc7a11	solute carrier family 7 (cationic amino acid transporter, y+ system), member 11 [Source:MGI Symbol;Acc:MGI:1347355]	2677	NA	NA	NA	NA	NA	0	0	0	0	0
ENSMUST00000058300.13	ENSMUSG00000030281	Il17rc	interleukin 17 receptor C [Source:MGI Symbol;Acc:MGI:2159336]	2302	123.818181818181	106.894736842105	103.416666666666	103.272727272727	143.2	11	19	12	11	5
ENSMUST00000204447.2	ENSMUSG00000030281	Il17rc	interleukin 17 receptor C [Source:MGI Symbol;Acc:MGI:2159336]	426	NA	NA	NA	NA	NA	0	0	0	0	0
ENSMUST00000205208.2	ENSMUSG00000030281	Il17rc	interleukin 17 receptor C [Source:MGI Symbol;Acc:MGI:2159336]	1759	91.1111111111111	113.785714285714	89.8	107	137.333333333333	9	14	5	2	6
ENSMUST00000204632.1	ENSMUSG00000030281	Il17rc	interleukin 17 receptor C [Source:MGI Symbol;Acc:MGI:2159336]	186	NA	NA	NA	NA	NA	0	0	0	0	0
ENSMUST00000203668.1	ENSMUSG00000030281	Il17rc	interleukin 17 receptor C [Source:MGI Symbol;Acc:MGI:2159336]	645	NA	NA	NA	NA	NA	0	0	0	0	0
ENSMUST00000039987.3	ENSMUSG00000041272	Tox	thymocyte selection-associated high mobility group box [Source:MGI Symbol;Acc:MGI:2181659]	3961	150	171.418918918918	152.08064516129	141.027777777777	140.107142857142	66	74	62	36	56
ENSMUST00000125974.1	ENSMUSG00000041272	Tox	thymocyte selection-associated high mobility group box [Source:MGI Symbol;Acc:MGI:2181659]	773	NA	NA	NA	NA	NA	0	0	0	0	0
ENSMUST00000147657.7	ENSMUSG00000041272	Tox	thymocyte selection-associated high mobility group box [Source:MGI Symbol;Acc:MGI:2181659]	1959	NA	NA	NA	NA	NA	0	0	0	0	0
ENSMUST00000150082.1	ENSMUSG00000041272	Tox	thymocyte selection-associated high mobility group box [Source:MGI Symbol;Acc:MGI:2181659]	2614	NA	NA	NA	NA	NA	0	0	0	0	0
ENSMUST00000214541.1	ENSMUSG00000063386	Olfr1387	olfactory receptor 1387 [Source:MGI Symbol;Acc:MGI:3031221]	4840	NA	NA	NA	NA	NA	0	0	0	0	0
ENSMUST00000073824.1	ENSMUSG00000063386	Olfr1387	olfactory receptor 1387 [Source:MGI Symbol;Acc:MGI:3031221]	936	NA	NA	NA	NA	NA	0	0	0	0	0
ENSMUST00000089465.5	ENSMUSG00000050014	Apol10b	apolipoprotein L 10B [Source:MGI Symbol;Acc:MGI:3043522]	2325	NA	NA	154	NA	NA	0	0	1	0	0
ENSMUST00000011445.7	ENSMUSG00000031495	Cd209d	CD209d antigen [Source:MGI Symbol;Acc:MGI:2157947]	919	109.5	NA	NA	NA	NA	2	0	0	0	0
ENSMUST00000209176.1	ENSMUSG00000031495	Cd209d	CD209d antigen [Source:MGI Symbol;Acc:MGI:2157947]	672	NA	NA	NA	NA	NA	0	0	0	0	0
ENSMUST00000028783.13	ENSMUSG00000027315	Spint1	serine protease inhibitor, Kunitz type 1 [Source:MGI Symbol;Acc:MGI:1338033]	2273	118.142857142857	77.125	85	113.5	171	7	8	1	2	1
ENSMUST00000110816.7	ENSMUSG00000027315	Spint1	serine protease inhibitor, Kunitz type 1 [Source:MGI Symbol;Acc:MGI:1338033]	1913	NA	NA	NA	139	NA	0	0	0	1	0
ENSMUST00000110817.2	ENSMUSG00000027315	Spint1	serine protease inhibitor, Kunitz type 1 [Source:MGI Symbol;Acc:MGI:1338033]	2323	101.888888888888	138.666666666666	146.333333333333	108.571428571428	101.571428571428	9	9	3	7	7
ENSMUST00000139903.1	ENSMUSG00000027315	Spint1	serine protease inhibitor, Kunitz type 1 [Source:MGI Symbol;Acc:MGI:1338033]	640	NA	NA	NA	NA	NA	0	0	0	0	0
ENSMUST00000134872.1	ENSMUSG00000027315	Spint1	serine protease inhibitor, Kunitz type 1 [Source:MGI Symbol;Acc:MGI:1338033]	492	NA	NA	NA	NA	NA	0	0	0	0	0
ENSMUST00000055374.7	ENSMUSG00000045521	Tssk2	testis-specific serine kinase 2 [Source:MGI Symbol;Acc:MGI:1347559]	1388	NA	NA	NA	NA	NA	0	0	0	0	0
ENSMUST00000031719.6	ENSMUSG00000029707	Fscn3	fascin actin-bundling protein 3 [Source:MGI Symbol;Acc:MGI:1890386]	1902	NA	NA	NA	NA	NA	0	0	0	0	0
ENSMUST00000147036.1	ENSMUSG00000029707	Fscn3	fascin actin-bundling protein 3 [Source:MGI Symbol;Acc:MGI:1890386]	403	NA	NA	NA	NA	NA	0	0	0	0	0
ENSMUST00000201031.3	ENSMUSG00000096066	Gm10424	predicted gene 10424 [Source:MGI Symbol;Acc:MGI:3704250]	1848	NA	NA	NA	NA	NA	0	0	0	0	0
ENSMUST00000180232.1	ENSMUSG00000096066	Gm10424	predicted gene 10424 [Source:MGI Symbol;Acc:MGI:3704250]	1221	NA	NA	NA	NA	NA	0	0	0	0	0
ENSMUST00000118111.7	ENSMUSG00000031302	Nlgn3	neuroligin 3 [Source:MGI Symbol;Acc:MGI:2444609]	8004	155.904761904761	155.86	152.885245901639	142.586956521739	147.15	42	50	61	46	60
ENSMUST00000130555.7	ENSMUSG00000031302	Nlgn3	neuroligin 3 [Source:MGI Symbol;Acc:MGI:2444609]	1852	NA	NA	NA	NA	NA	0	0	0	0	0
ENSMUST00000151528.7	ENSMUSG00000031302	Nlgn3	neuroligin 3 [Source:MGI Symbol;Acc:MGI:2444609]	8541	159.83606557377	148.291666666666	155.469387755102	140.696969696969	158.152542372881	61	48	49	33	59
ENSMUST00000065858.2	ENSMUSG00000031302	Nlgn3	neuroligin 3 [Source:MGI Symbol;Acc:MGI:2444609]	8465	143.038461538461	148.511627906976	152.544117647058	141.4	150.628571428571	78	86	68	55	70
ENSMUST00000147443.1	ENSMUSG00000031302	Nlgn3	neuroligin 3 [Source:MGI Symbol;Acc:MGI:2444609]	747	NA	NA	NA	NA	NA	0	0	0	0	0
ENSMUST00000144860.1	ENSMUSG00000031302	Nlgn3	neuroligin 3 [Source:MGI Symbol;Acc:MGI:2444609]	636	NA	NA	NA	NA	NA	0	0	0	0	0
ENSMUST00000102743.9	ENSMUSG00000037533	Rapgef6	Rap guanine nucleotide exchange factor (GEF) 6 [Source:MGI Symbol;Acc:MGI:2384761]	8189	223.1	209.291666666666	177.142857142857	206.666666666666	188.130434782608	30	24	21	12	23
ENSMUST00000155132.7	ENSMUSG00000037533	Rapgef6	Rap guanine nucleotide exchange factor (GEF) 6 [Source:MGI Symbol;Acc:MGI:2384761]	628	NA	NA	NA	NA	NA	0	0	0	0	0
ENSMUST00000108895.7	ENSMUSG00000037533	Rapgef6	Rap guanine nucleotide exchange factor (GEF) 6 [Source:MGI Symbol;Acc:MGI:2384761]	1829	NA	NA	NA	NA	NA	0	0	0	0	0
ENSMUST00000101206.9	ENSMUSG00000037533	Rapgef6	Rap guanine nucleotide exchange factor (GEF) 6 [Source:MGI Symbol;Acc:MGI:2384761]	5864	NA	NA	NA	NA	NA	0	0	0	0	0
ENSMUST00000139360.1	ENSMUSG00000037533	Rapgef6	Rap guanine nucleotide exchange factor (GEF) 6 [Source:MGI Symbol;Acc:MGI:2384761]	692	NA	NA	NA	NA	NA	0	0	0	0	0
ENSMUST00000207429.1	ENSMUSG00000037533	Rapgef6	Rap guanine nucleotide exchange factor (GEF) 6 [Source:MGI Symbol;Acc:MGI:2384761]	5164	NA	NA	NA	NA	NA	0	0	0	0	0
ENSMUST00000149372.1	ENSMUSG00000037533	Rapgef6	Rap guanine nucleotide exchange factor (GEF) 6 [Source:MGI Symbol;Acc:MGI:2384761]	4843	NA	NA	135	NA	NA	0	0	1	0	0
ENSMUST00000218995.1	ENSMUSG00000037533	Rapgef6	Rap guanine nucleotide exchange factor (GEF) 6 [Source:MGI Symbol;Acc:MGI:2384761]	2674	NA	NA	NA	NA	NA	0	0	0	0	0
ENSMUST00000220269.1	ENSMUSG00000037533	Rapgef6	Rap guanine nucleotide exchange factor (GEF) 6 [Source:MGI Symbol;Acc:MGI:2384761]	2797	NA	NA	NA	NA	NA	0	0	0	0	0
ENSMUST00000094536.9	ENSMUSG00000037533	Rapgef6	Rap guanine nucleotide exchange factor (GEF) 6 [Source:MGI Symbol;Acc:MGI:2384761]	3372	NA	NA	NA	NA	NA	0	0	0	0	0
ENSMUST00000108894.1	ENSMUSG00000037533	Rapgef6	Rap guanine nucleotide exchange factor (GEF) 6 [Source:MGI Symbol;Acc:MGI:2384761]	3475	NA	NA	NA	NA	NA	0	0	0	0	0
ENSMUST00000239168.1	ENSMUSG00000037533	Rapgef6	Rap guanine nucleotide exchange factor (GEF) 6 [Source:MGI Symbol;Acc:MGI:2384761]	7131	193.666666666666	171.705882352941	162.65	245	190.611111111111	21	17	20	5	18
ENSMUST00000136494.1	ENSMUSG00000037533	Rapgef6	Rap guanine nucleotide exchange factor (GEF) 6 [Source:MGI Symbol;Acc:MGI:2384761]	716	NA	NA	NA	NA	NA	0	0	0	0	0
ENSMUST00000230670.1	ENSMUSG00000116079	Gm36245	predicted gene, 36245 [Source:MGI Symbol;Acc:MGI:5595404]	520	NA	NA	NA	NA	NA	0	0	0	0	0
ENSMUST00000101445.10	ENSMUSG00000045466	Zfp956	zinc finger protein 956 [Source:MGI Symbol;Acc:MGI:2141515]	2761	134.833333333333	171.111111111111	144.823529411764	135.555555555555	173.5	36	36	34	18	24
ENSMUST00000174790.1	ENSMUSG00000045466	Zfp956	zinc finger protein 956 [Source:MGI Symbol;Acc:MGI:2141515]	577	NA	NA	NA	NA	NA	0	0	0	0	0
ENSMUST00000140719.1	ENSMUSG00000045466	Zfp956	zinc finger protein 956 [Source:MGI Symbol;Acc:MGI:2141515]	2823	173.571428571428	166.3	176.333333333333	161	181.5	14	10	3	1	4
ENSMUST00000172190.3	ENSMUSG00000090417	Vmn2r94	vomeronasal 2, receptor 94 [Source:MGI Symbol;Acc:MGI:3648050]	5153	NA	NA	NA	NA	NA	0	0	0	0	0
ENSMUST00000231815.2	ENSMUSG00000090417	Vmn2r94	vomeronasal 2, receptor 94 [Source:MGI Symbol;Acc:MGI:3648050]	9423	NA	NA	NA	NA	NA	0	0	0	0	0
ENSMUST00000231457.1	ENSMUSG00000090417	Vmn2r94	vomeronasal 2, receptor 94 [Source:MGI Symbol;Acc:MGI:3648050]	5538	NA	NA	NA	NA	NA	0	0	0	0	0
ENSMUST00000231390.1	ENSMUSG00000090417	Vmn2r94	vomeronasal 2, receptor 94 [Source:MGI Symbol;Acc:MGI:3648050]	3783	NA	NA	NA	NA	NA	0	0	0	0	0
ENSMUST00000020717.11	ENSMUSG00000020440	Arf5	ADP-ribosylation factor 5 [Source:MGI Symbol;Acc:MGI:99434]	1116	142.123711340206	145.54781420765	139.763271162123	137.63768115942	143.069518716577	582	732	697	483	748
ENSMUST00000202028.1	ENSMUSG00000020440	Arf5	ADP-ribosylation factor 5 [Source:MGI Symbol;Acc:MGI:99434]	919	NA	132	NA	NA	NA	0	1	0	0	0
ENSMUST00000169841.1	ENSMUSG00000020440	Arf5	ADP-ribosylation factor 5 [Source:MGI Symbol;Acc:MGI:99434]	768	NA	NA	NA	NA	NA	0	0	0	0	0
ENSMUST00000130293.7	ENSMUSG00000046804	Phgr1	proline/histidine/glycine-rich 1 [Source:MGI Symbol;Acc:MGI:1858382]	542	NA	NA	NA	NA	NA	0	0	0	0	0
ENSMUST00000061360.3	ENSMUSG00000046804	Phgr1	proline/histidine/glycine-rich 1 [Source:MGI Symbol;Acc:MGI:1858382]	538	NA	NA	NA	NA	NA	0	0	0	0	0
ENSMUST00000199277.1	ENSMUSG00000039883	Lrrc17	leucine rich repeat containing 17 [Source:MGI Symbol;Acc:MGI:1921761]	1611	NA	NA	NA	NA	NA	0	0	0	0	0
ENSMUST00000035651.5	ENSMUSG00000039883	Lrrc17	leucine rich repeat containing 17 [Source:MGI Symbol;Acc:MGI:1921761]	2154	155	75.5	113.5	NA	4	1	2	2	0	1
ENSMUST00000075477.7	ENSMUSG00000062694	Cav3	caveolin 3 [Source:MGI Symbol;Acc:MGI:107570]	1157	NA	NA	192	117	63	0	0	1	1	1
ENSMUST00000043680.8	ENSMUSG00000035198	Tubg1	tubulin, gamma 1 [Source:MGI Symbol;Acc:MGI:101834]	1802	130.075187969924	124.985611510791	125.728070175438	125.573913043478	133.008264462809	133	139	114	115	121
ENSMUST00000137844.1	ENSMUSG00000035198	Tubg1	tubulin, gamma 1 [Source:MGI Symbol;Acc:MGI:101834]	852	NA	NA	NA	25	114	0	0	0	1	1
ENSMUST00000053306.7	ENSMUSG00000049112	Oxtr	oxytocin receptor [Source:MGI Symbol;Acc:MGI:109147]	4704	150.714285714285	158	127.190476190476	114.8	160.733333333333	14	16	21	10	15
ENSMUST00000204027.1	ENSMUSG00000049112	Oxtr	oxytocin receptor [Source:MGI Symbol;Acc:MGI:109147]	3721	147.571428571428	111.166666666666	138.25	157.25	130	7	6	4	4	5
ENSMUST00000051358.10	ENSMUSG00000048520	Fbxl13	F-box and leucine-rich repeat protein 13 [Source:MGI Symbol;Acc:MGI:2443416]	2531	NA	92	95	NA	NA	0	1	1	0	0
ENSMUST00000137788.7	ENSMUSG00000048520	Fbxl13	F-box and leucine-rich repeat protein 13 [Source:MGI Symbol;Acc:MGI:2443416]	2343	NA	NA	NA	NA	NA	0	0	0	0	0
ENSMUST00000115234.1	ENSMUSG00000048520	Fbxl13	F-box and leucine-rich repeat protein 13 [Source:MGI Symbol;Acc:MGI:2443416]	2143	NA	NA	NA	NA	NA	0	0	0	0	0
ENSMUST00000153598.1	ENSMUSG00000048520	Fbxl13	F-box and leucine-rich repeat protein 13 [Source:MGI Symbol;Acc:MGI:2443416]	669	NA	NA	NA	NA	NA	0	0	0	0	0
ENSMUST00000200168.1	ENSMUSG00000048520	Fbxl13	F-box and leucine-rich repeat protein 13 [Source:MGI Symbol;Acc:MGI:2443416]	2089	NA	NA	NA	NA	NA	0	0	0	0	0
ENSMUST00000213398.1	ENSMUSG00000094858	Olfr1297	olfactory receptor 1297 [Source:MGI Symbol;Acc:MGI:3031131]	6998	NA	NA	NA	NA	NA	0	0	0	0	0
ENSMUST00000099612.1	ENSMUSG00000094858	Olfr1297	olfactory receptor 1297 [Source:MGI Symbol;Acc:MGI:3031131]	939	NA	NA	NA	NA	NA	0	0	0	0	0
ENSMUST00000045756.13	ENSMUSG00000041959	S100a10	S100 calcium binding protein A10 (calpactin) [Source:MGI Symbol;Acc:MGI:1339468]	685	116.033980582524	110.170454545454	101.685714285714	114.746031746031	115.711920529801	206	352	280	189	302
ENSMUST00000148400.1	ENSMUSG00000041959	S100a10	S100 calcium binding protein A10 (calpactin) [Source:MGI Symbol;Acc:MGI:1339468]	611	NA	NA	NA	NA	NA	0	0	0	0	0
ENSMUST00000170612.1	ENSMUSG00000041959	S100a10	S100 calcium binding protein A10 (calpactin) [Source:MGI Symbol;Acc:MGI:1339468]	477	NA	NA	NA	NA	NA	0	0	0	0	0
ENSMUST00000090511.3	ENSMUSG00000029708	Gcc1	golgi coiled coil 1 [Source:MGI Symbol;Acc:MGI:1921625]	4650	129.829268292682	142.591836734693	147.941176470588	149.964285714285	144.131578947368	41	49	51	28	38
ENSMUST00000064377.6	ENSMUSG00000029708	Gcc1	golgi coiled coil 1 [Source:MGI Symbol;Acc:MGI:1921625]	2859	NA	NA	NA	NA	NA	0	0	0	0	0
ENSMUST00000165455.1	ENSMUSG00000029708	Gcc1	golgi coiled coil 1 [Source:MGI Symbol;Acc:MGI:1921625]	609	NA	NA	NA	NA	NA	0	0	0	0	0
ENSMUST00000170767.1	ENSMUSG00000029708	Gcc1	golgi coiled coil 1 [Source:MGI Symbol;Acc:MGI:1921625]	416	NA	NA	NA	NA	NA	0	0	0	0	0
ENSMUST00000193640.1	ENSMUSG00000039239	Tgfb2	transforming growth factor, beta 2 [Source:MGI Symbol;Acc:MGI:98726]	363	NA	NA	NA	NA	NA	0	0	0	0	0
ENSMUST00000194593.1	ENSMUSG00000039239	Tgfb2	transforming growth factor, beta 2 [Source:MGI Symbol;Acc:MGI:98726]	359	NA	NA	NA	NA	NA	0	0	0	0	0
ENSMUST00000045288.13	ENSMUSG00000039239	Tgfb2	transforming growth factor, beta 2 [Source:MGI Symbol;Acc:MGI:98726]	5116	156.478260869565	143.428571428571	145.764705882352	143.944444444444	143.714285714285	23	21	17	18	14
ENSMUST00000195201.1	ENSMUSG00000039239	Tgfb2	transforming growth factor, beta 2 [Source:MGI Symbol;Acc:MGI:98726]	3485	138.5	181.666666666666	133.5	82	66	2	3	2	1	1
ENSMUST00000191766.5	ENSMUSG00000039239	Tgfb2	transforming growth factor, beta 2 [Source:MGI Symbol;Acc:MGI:98726]	744	NA	NA	NA	NA	NA	0	0	0	0	0
ENSMUST00000194960.1	ENSMUSG00000039239	Tgfb2	transforming growth factor, beta 2 [Source:MGI Symbol;Acc:MGI:98726]	898	NA	NA	NA	NA	NA	0	0	0	0	0
ENSMUST00000149991.1	ENSMUSG00000005237	Dnah2	dynein, axonemal, heavy chain 2 [Source:MGI Symbol;Acc:MGI:107731]	2616	NA	125	NA	NA	NA	0	1	0	0	0
ENSMUST00000208777.1	ENSMUSG00000005237	Dnah2	dynein, axonemal, heavy chain 2 [Source:MGI Symbol;Acc:MGI:107731]	696	NA	NA	NA	NA	NA	0	0	0	0	0
ENSMUST00000154985.1	ENSMUSG00000005237	Dnah2	dynein, axonemal, heavy chain 2 [Source:MGI Symbol;Acc:MGI:107731]	386	NA	NA	NA	NA	NA	0	0	0	0	0
ENSMUST00000108659.1	ENSMUSG00000005237	Dnah2	dynein, axonemal, heavy chain 2 [Source:MGI Symbol;Acc:MGI:107731]	13704	31	NA	131.5	NA	NA	1	0	2	0	0
ENSMUST00000151811.1	ENSMUSG00000005237	Dnah2	dynein, axonemal, heavy chain 2 [Source:MGI Symbol;Acc:MGI:107731]	924	NA	NA	NA	NA	NA	0	0	0	0	0
ENSMUST00000035539.11	ENSMUSG00000005237	Dnah2	dynein, axonemal, heavy chain 2 [Source:MGI Symbol;Acc:MGI:107731]	13569	NA	NA	NA	NA	NA	0	0	0	0	0
ENSMUST00000123379.1	ENSMUSG00000041729	Coro2b	coronin, actin binding protein, 2B [Source:MGI Symbol;Acc:MGI:2444283]	1872	NA	NA	NA	NA	NA	0	0	0	0	0
ENSMUST00000151604.1	ENSMUSG00000041729	Coro2b	coronin, actin binding protein, 2B [Source:MGI Symbol;Acc:MGI:2444283]	816	NA	NA	NA	NA	NA	0	0	0	0	0
ENSMUST00000174439.1	ENSMUSG00000041729	Coro2b	coronin, actin binding protein, 2B [Source:MGI Symbol;Acc:MGI:2444283]	393	NA	NA	NA	NA	NA	0	0	0	0	0
ENSMUST00000173171.2	ENSMUSG00000041729	Coro2b	coronin, actin binding protein, 2B [Source:MGI Symbol;Acc:MGI:2444283]	396	NA	NA	NA	NA	NA	0	0	0	0	0
ENSMUST00000164246.8	ENSMUSG00000041729	Coro2b	coronin, actin binding protein, 2B [Source:MGI Symbol;Acc:MGI:2444283]	987	NA	NA	NA	NA	3	0	0	0	0	1
ENSMUST00000131981.1	ENSMUSG00000041729	Coro2b	coronin, actin binding protein, 2B [Source:MGI Symbol;Acc:MGI:2444283]	618	NA	NA	NA	NA	NA	0	0	0	0	0
ENSMUST00000048043.11	ENSMUSG00000041729	Coro2b	coronin, actin binding protein, 2B [Source:MGI Symbol;Acc:MGI:2444283]	3610	148.296842105263	151.202247191011	154.521634615384	153.517123287671	149.306329113924	475	445	416	292	395
ENSMUST00000090858.9	ENSMUSG00000042133	Ppig	peptidyl-prolyl isomerase G (cyclophilin G) [Source:MGI Symbol;Acc:MGI:2445173]	6127	172.568181818181	183.553191489361	166.404255319148	161.771428571428	158.767441860465	44	47	47	35	43
ENSMUST00000124810.7	ENSMUSG00000042133	Ppig	peptidyl-prolyl isomerase G (cyclophilin G) [Source:MGI Symbol;Acc:MGI:2445173]	598	NA	NA	NA	NA	NA	0	0	0	0	0
ENSMUST00000125105.7	ENSMUSG00000042133	Ppig	peptidyl-prolyl isomerase G (cyclophilin G) [Source:MGI Symbol;Acc:MGI:2445173]	300	NA	NA	NA	NA	NA	0	0	0	0	0
ENSMUST00000040915.14	ENSMUSG00000042133	Ppig	peptidyl-prolyl isomerase G (cyclophilin G) [Source:MGI Symbol;Acc:MGI:2445173]	6245	167.625	189.333333333333	188.976744186046	160.571428571428	183.953488372093	40	39	43	28	43
ENSMUST00000146234.7	ENSMUSG00000042133	Ppig	peptidyl-prolyl isomerase G (cyclophilin G) [Source:MGI Symbol;Acc:MGI:2445173]	801	NA	NA	NA	NA	NA	0	0	0	0	0
ENSMUST00000144652.1	ENSMUSG00000042133	Ppig	peptidyl-prolyl isomerase G (cyclophilin G) [Source:MGI Symbol;Acc:MGI:2445173]	658	NA	NA	NA	NA	NA	0	0	0	0	0
ENSMUST00000134424.7	ENSMUSG00000042133	Ppig	peptidyl-prolyl isomerase G (cyclophilin G) [Source:MGI Symbol;Acc:MGI:2445173]	548	NA	NA	NA	NA	NA	0	0	0	0	0
ENSMUST00000142839.1	ENSMUSG00000042133	Ppig	peptidyl-prolyl isomerase G (cyclophilin G) [Source:MGI Symbol;Acc:MGI:2445173]	583	NA	NA	NA	NA	NA	0	0	0	0	0
ENSMUST00000134500.1	ENSMUSG00000042133	Ppig	peptidyl-prolyl isomerase G (cyclophilin G) [Source:MGI Symbol;Acc:MGI:2445173]	794	NA	NA	NA	NA	NA	0	0	0	0	0
ENSMUST00000128506.1	ENSMUSG00000042133	Ppig	peptidyl-prolyl isomerase G (cyclophilin G) [Source:MGI Symbol;Acc:MGI:2445173]	428	NA	NA	NA	NA	NA	0	0	0	0	0
ENSMUST00000143954.1	ENSMUSG00000042133	Ppig	peptidyl-prolyl isomerase G (cyclophilin G) [Source:MGI Symbol;Acc:MGI:2445173]	675	NA	NA	NA	NA	NA	0	0	0	0	0
ENSMUST00000153772.1	ENSMUSG00000042133	Ppig	peptidyl-prolyl isomerase G (cyclophilin G) [Source:MGI Symbol;Acc:MGI:2445173]	693	NA	NA	NA	NA	NA	0	0	0	0	0
ENSMUST00000029944.12	ENSMUSG00000028277	Ube2j1	ubiquitin-conjugating enzyme E2J 1 [Source:MGI Symbol;Acc:MGI:1926245]	662	NA	NA	NA	NA	NA	0	0	0	0	0
ENSMUST00000135924.1	ENSMUSG00000028277	Ube2j1	ubiquitin-conjugating enzyme E2J 1 [Source:MGI Symbol;Acc:MGI:1926245]	3190	138.64423076923	145.134615384615	130.59375	147.177215189873	138.699029126213	104	104	128	79	103
ENSMUST00000124992.7	ENSMUSG00000028277	Ube2j1	ubiquitin-conjugating enzyme E2J 1 [Source:MGI Symbol;Acc:MGI:1926245]	3530	136.434554973822	134	142.645161290322	130.508928571428	131.721088435374	191	189	155	112	147
ENSMUST00000177768.2	ENSMUSG00000095595	Fam177a	family with sequence similarity 177, member A [Source:MGI Symbol;Acc:MGI:1920635]	3922	123.10902255639	132.345381526104	123.808988764044	131.933333333333	132.582887700534	266	249	178	105	187
ENSMUST00000027975.7	ENSMUSG00000026664	Phyh	phytanoyl-CoA hydroxylase [Source:MGI Symbol;Acc:MGI:891978]	1438	138.610027855153	138.0775	132.200680272108	134.325	129.823529411764	359	400	294	200	272
ENSMUST00000146933.1	ENSMUSG00000026664	Phyh	phytanoyl-CoA hydroxylase [Source:MGI Symbol;Acc:MGI:891978]	748	NA	NA	NA	NA	NA	0	0	0	0	0
ENSMUST00000128738.1	ENSMUSG00000026664	Phyh	phytanoyl-CoA hydroxylase [Source:MGI Symbol;Acc:MGI:891978]	365	NA	NA	NA	NA	NA	0	0	0	0	0
ENSMUST00000028259.11	ENSMUSG00000026896	Ifih1	interferon induced with helicase C domain 1 [Source:MGI Symbol;Acc:MGI:1918836]	5470	148.357142857142	148.2	113.857142857142	138.5	166.833333333333	14	10	7	2	6
ENSMUST00000112459.3	ENSMUSG00000026896	Ifih1	interferon induced with helicase C domain 1 [Source:MGI Symbol;Acc:MGI:1918836]	3616	114	128	84	53	95	1	1	2	1	1
ENSMUST00000176431.7	ENSMUSG00000026896	Ifih1	interferon induced with helicase C domain 1 [Source:MGI Symbol;Acc:MGI:1918836]	2904	NA	NA	NA	NA	NA	0	0	0	0	0
ENSMUST00000176388.1	ENSMUSG00000026896	Ifih1	interferon induced with helicase C domain 1 [Source:MGI Symbol;Acc:MGI:1918836]	439	NA	NA	NA	NA	NA	0	0	0	0	0
ENSMUST00000175964.1	ENSMUSG00000026896	Ifih1	interferon induced with helicase C domain 1 [Source:MGI Symbol;Acc:MGI:1918836]	2565	NA	NA	117	NA	NA	0	0	1	0	0
ENSMUST00000134423.2	ENSMUSG00000069855	Slc47a2	solute carrier family 47, member 2 [Source:MGI Symbol;Acc:MGI:3588190]	1503	NA	NA	NA	NA	NA	0	0	0	0	0
ENSMUST00000147450.1	ENSMUSG00000069855	Slc47a2	solute carrier family 47, member 2 [Source:MGI Symbol;Acc:MGI:3588190]	278	NA	NA	NA	NA	NA	0	0	0	0	0
ENSMUST00000093029.8	ENSMUSG00000069855	Slc47a2	solute carrier family 47, member 2 [Source:MGI Symbol;Acc:MGI:3588190]	2377	250	NA	NA	NA	NA	1	0	0	0	0
ENSMUST00000054048.9	ENSMUSG00000048965	Mrgpre	MAS-related GPR, member E [Source:MGI Symbol;Acc:MGI:2441884]	3761	149.666666666666	140.578947368421	147.052631578947	142.866666666666	142.444444444444	27	19	19	15	18
ENSMUST00000058688.6	ENSMUSG00000047496	Rnf152	ring finger protein 152 [Source:MGI Symbol;Acc:MGI:2443787]	8492	172.928571428571	132.166666666666	115.846153846153	163.153846153846	191.818181818181	14	18	13	13	11
ENSMUST00000172299.1	ENSMUSG00000047496	Rnf152	ring finger protein 152 [Source:MGI Symbol;Acc:MGI:2443787]	8406	163	112.818181818181	129.166666666666	164.8	136.666666666666	8	11	12	5	15
ENSMUST00000232909.1	ENSMUSG00000045417	Vmn1r230	vomeronasal 1 receptor 230 [Source:MGI Symbol;Acc:MGI:2159629]	8172	NA	NA	NA	NA	NA	0	0	0	0	0
ENSMUST00000233670.1	ENSMUSG00000045417	Vmn1r230	vomeronasal 1 receptor 230 [Source:MGI Symbol;Acc:MGI:2159629]	7934	NA	NA	NA	NA	NA	0	0	0	0	0
ENSMUST00000233939.1	ENSMUSG00000045417	Vmn1r230	vomeronasal 1 receptor 230 [Source:MGI Symbol;Acc:MGI:2159629]	8003	NA	NA	NA	NA	NA	0	0	0	0	0
ENSMUST00000053974.1	ENSMUSG00000045417	Vmn1r230	vomeronasal 1 receptor 230 [Source:MGI Symbol;Acc:MGI:2159629]	951	NA	NA	NA	NA	NA	0	0	0	0	0
ENSMUST00000152084.1	ENSMUSG00000018900	Slc22a5	solute carrier family 22 (organic cation transporter), member 5 [Source:MGI Symbol;Acc:MGI:1329012]	861	NA	NA	NA	NA	NA	0	0	0	0	0
ENSMUST00000136307.1	ENSMUSG00000018900	Slc22a5	solute carrier family 22 (organic cation transporter), member 5 [Source:MGI Symbol;Acc:MGI:1329012]	737	NA	NA	NA	NA	NA	0	0	0	0	0
ENSMUST00000019044.7	ENSMUSG00000018900	Slc22a5	solute carrier family 22 (organic cation transporter), member 5 [Source:MGI Symbol;Acc:MGI:1329012]	3062	193.222222222222	181.941176470588	155.12	146.705882352941	142.714285714285	27	17	25	17	21
ENSMUST00000235948.1	ENSMUSG00000050933	Vmn1r231	vomeronasal 1 receptor 231 [Source:MGI Symbol;Acc:MGI:2159628]	2523	NA	NA	NA	NA	NA	0	0	0	0	0
ENSMUST00000238096.1	ENSMUSG00000050933	Vmn1r231	vomeronasal 1 receptor 231 [Source:MGI Symbol;Acc:MGI:2159628]	2061	NA	NA	NA	NA	NA	0	0	0	0	0
ENSMUST00000061278.1	ENSMUSG00000050933	Vmn1r231	vomeronasal 1 receptor 231 [Source:MGI Symbol;Acc:MGI:2159628]	936	NA	NA	NA	NA	NA	0	0	0	0	0
ENSMUST00000237554.1	ENSMUSG00000062165	Vmn1r232	vomeronasal 1 receptor 232 [Source:MGI Symbol;Acc:MGI:2159625]	1722	NA	NA	NA	NA	NA	0	0	0	0	0
ENSMUST00000237560.1	ENSMUSG00000062165	Vmn1r232	vomeronasal 1 receptor 232 [Source:MGI Symbol;Acc:MGI:2159625]	1841	NA	NA	NA	NA	NA	0	0	0	0	0
ENSMUST00000077001.2	ENSMUSG00000062165	Vmn1r232	vomeronasal 1 receptor 232 [Source:MGI Symbol;Acc:MGI:2159625]	1159	NA	NA	NA	NA	NA	0	0	0	0	0
ENSMUST00000091358.10	ENSMUSG00000028560	Usp1	ubiquitin specific peptidase 1 [Source:MGI Symbol;Acc:MGI:2385198]	3527	153.523809523809	140.108108108108	134.575757575757	130.172413793103	140.6	21	37	33	29	35
ENSMUST00000169053.1	ENSMUSG00000028560	Usp1	ubiquitin specific peptidase 1 [Source:MGI Symbol;Acc:MGI:2385198]	317	NA	NA	NA	NA	NA	0	0	0	0	0
[truncated: 139,197 more rows]

## Sheet: 10 reads per condition min
transcript	Gene.ID	Gene.name	Gene.description	Transcript.length.including.UTRs.and.CDS	WT2	WT3	KO1	KO2	KO3	WT2_analyzed_reads	WT3_analyzed_reads	KO1_analyzed_reads	KO2_analyzed_reads	KO3_analyzed_reads	t.test
ENSMUST00000163093.1	ENSMUSG00000071573	Rnls	renalase, FAD-dependent amine oxidase [Source:MGI Symbol;Acc:MGI:1915045]	1378	182.923076923076	154.833333333333	167.5	154	139.571428571428	13	6	6	3	7	0.379291263291548
ENSMUST00000195764.1	ENSMUSG00000103081	Pcdhgb8	protocadherin gamma subfamily B, 8 [Source:MGI Symbol;Acc:MGI:1935200]	4615	141.696969696969	151.833333333333	139	142.6	163.275862068965	33	24	27	15	29	0.893304804980276
ENSMUST00000106393.7	ENSMUSG00000006395	Hyi	hydroxypyruvate isomerase (putative) [Source:MGI Symbol;Acc:MGI:1915430]	843	108.2	128.076923076923	114	133.857142857142	144.939393939393	25	26	15	7	33	0.423289711164146
ENSMUST00000201125.3	ENSMUSG00000006638	Abhd1	abhydrolase domain containing 1 [Source:MGI Symbol;Acc:MGI:1931013]	1352	165.5625	213.5	179	123.285714285714	148.727272727272	16	10	2	7	11	0.248116013328422
ENSMUST00000103299.2	ENSMUSG00000076498	Trbc2	T cell receptor beta, constant 2 [Source:MGI Symbol;Acc:MGI:4835227]	692	143.156462585034	137.524691358024	145.036231884057	150	145.858208955223	147	162	138	80	134	0.105554546197517
ENSMUST00000195192.1	ENSMUSG00000076612	Ighg2c	immunoglobulin heavy constant gamma 2C [Source:MGI Symbol;Acc:MGI:2686979]	1111	142.692307692307	155.714285714285	140.153846153846	135.416666666666	130.333333333333	13	14	13	12	9	0.106252696379824
ENSMUST00000177715.7	ENSMUSG00000076617	Ighm	immunoglobulin heavy constant mu [Source:MGI Symbol;Acc:MGI:96448]	1698	136.677419354838	127.477272727272	113.40625	139.625	136	31	44	32	24	30	0.843093030958024
ENSMUST00000103426.2	ENSMUSG00000076617	Ighm	immunoglobulin heavy constant mu [Source:MGI Symbol;Acc:MGI:96448]	1493	123.257731958762	120.240384615384	125.864864864864	119.397435897435	124.3738317757	97	104	111	78	107	0.633189936842508
ENSMUST00000082421.1	ENSMUSG00000064370	mt-Cytb	mitochondrially encoded cytochrome b [Source:MGI Symbol;Acc:MGI:102501]	1144	72.5215289052022	73.1340402246263	75.2354623796075	74.1255492059845	75.4827781715095	56668	55737	55236	34823	49385	0.0361642397817013
ENSMUST00000082419.1	ENSMUSG00000064368	mt-Nd6	mitochondrially encoded NADH dehydrogenase 6 [Source:MGI Symbol;Acc:MGI:102495]	519	58.8105864037363	59.0945870535714	62.7601254246145	60.2122954444935	63.994021919628	3854	3584	3827	2261	3011	0.101423854566737
ENSMUST00000082418.1	ENSMUSG00000064367	mt-Nd5	mitochondrially encoded NADH dehydrogenase 5 [Source:MGI Symbol;Acc:MGI:102496]	1824	69.2549941245593	70.0127538970241	71.6210832587287	70.034470872113	71.56	4255	4234	4468	2901	3925	0.142375406417316
ENSMUST00000082414.1	ENSMUSG00000064363	mt-Nd4	mitochondrially encoded NADH dehydrogenase 4 [Source:MGI Symbol;Acc:MGI:102498]	1378	64.7373855053832	65.4355967467372	66.9859758724687	65.4815000333934	67.1609096284616	49784	47583	46420	29946	40588	0.142133089862157
ENSMUST00000084013.1	ENSMUSG00000065947	mt-Nd4l	mitochondrially encoded NADH dehydrogenase 4L [Source:MGI Symbol;Acc:MGI:102497]	297	70.0432835820895	70.5444078947368	72.8502202643171	72.8546365914787	74.1224862888482	670	608	681	399	547	0.01409450839345
ENSMUST00000082411.1	ENSMUSG00000064360	mt-Nd3	mitochondrially encoded NADH dehydrogenase 3 [Source:MGI Symbol;Acc:MGI:102499]	348	66.0907443700772	66.225818129163	68.0975544208546	66.9396963901506	68.3232350193514	27043	27624	26047	16732	22479	0.0609276705712994
ENSMUST00000082409.1	ENSMUSG00000064358	mt-Co3	mitochondrially encoded cytochrome c oxidase III [Source:MGI Symbol;Acc:MGI:102502]	784	80.0596855848654	80.8294816633493	82.9635989349637	81.5511425566497	82.9390750965947	82566	83903	81124	52295	74797	0.0551415891954457
ENSMUST00000082408.1	ENSMUSG00000064357	mt-Atp6	mitochondrially encoded ATP synthase 6 [Source:MGI Symbol;Acc:MGI:99927]	681	74.8451657846815	75.7309943655458	78.1999124069323	76.6378205763928	78.4080350050863	81823	82173	79915	50417	71761	0.0532041887872822
ENSMUST00000082407.1	ENSMUSG00000064356	mt-Atp8	mitochondrially encoded ATP synthase 8 [Source:MGI Symbol;Acc:MGI:99926]	204	72.3934659090909	71.068376068376	73.9485714285714	70.3361581920904	72.2154811715481	704	585	700	354	478	0.781099712204461
ENSMUST00000082405.1	ENSMUSG00000064354	mt-Co2	mitochondrially encoded cytochrome c oxidase II [Source:MGI Symbol;Acc:MGI:102503]	684	64.4909986734887	65.0673436331921	66.516505024219	65.6504893825989	66.6460734870317	94986	96312	91457	59054	83280	0.046990236511683
ENSMUST00000082402.1	ENSMUSG00000064351	mt-Co1	mitochondrially encoded cytochrome c oxidase I [Source:MGI Symbol;Acc:MGI:102504]	1545	74.8404644240217	75.3007176084526	77.4038417854506	76.0426493126243	77.2429342130797	138408	138655	140872	87434	128825	0.0514113295368697
ENSMUST00000082396.1	ENSMUSG00000064345	mt-Nd2	mitochondrially encoded NADH dehydrogenase 2 [Source:MGI Symbol;Acc:MGI:102500]	1038	68.3437940209735	68.6151207062466	69.8777301747311	69.0475317533062	70.0895694885871	25556	23901	23808	15274	20766	0.0667477119508115
ENSMUST00000082392.1	ENSMUSG00000064341	mt-Nd1	mitochondrially encoded NADH dehydrogenase 1 [Source:MGI Symbol;Acc:MGI:101787]	957	63.9529738046074	64.7137313553498	66.3988407458015	64.6723115422851	66.0950634342419	49398	49478	45374	29171	39805	0.158483023392889
ENSMUST00000107076.9	ENSMUSG00000028101	Pias3	protein inhibitor of activated STAT 3 [Source:MGI Symbol;Acc:MGI:1913126]	2858	194.125	146.35294117647	171.285714285714	169	187.9	8	17	7	7	10	0.783582615338968
ENSMUST00000064900.15	ENSMUSG00000028101	Pias3	protein inhibitor of activated STAT 3 [Source:MGI Symbol;Acc:MGI:1913126]	2931	160.84375	194.190476190476	149.304347826086	159.083333333333	144.16	32	42	23	24	25	0.145783210184698
ENSMUST00000107077.3	ENSMUSG00000028101	Pias3	protein inhibitor of activated STAT 3 [Source:MGI Symbol;Acc:MGI:1913126]	2695	156.222222222222	158.7	188.166666666666	138.375	141.125	18	10	6	8	8	0.944719876872043
ENSMUST00000226740.1	ENSMUSG00000042354	Gnl3	guanine nucleotide binding protein-like 3 (nucleolar) [Source:MGI Symbol;Acc:MGI:1353651]	1765	203.857142857142	180.384615384615	215.818181818181	210.76923076923	153.625	14	13	11	13	16	0.96532530336055
ENSMUST00000037739.7	ENSMUSG00000042354	Gnl3	guanine nucleotide binding protein-like 3 (nucleolar) [Source:MGI Symbol;Acc:MGI:1353651]	1947	154.341463414634	179.097560975609	174.723404255319	184.178571428571	170.53488372093	41	41	47	28	43	0.424921731219247
ENSMUST00000004560.11	ENSMUSG00000004446	Bid	BH3 interacting domain death agonist [Source:MGI Symbol;Acc:MGI:108093]	2189	161.085714285714	162.258064516129	161.064516129032	196.75	193.166666666666	35	31	31	24	36	0.230438835143993
ENSMUST00000025204.6	ENSMUSG00000024346	Pfdn1	prefoldin 1 [Source:MGI Symbol;Acc:MGI:1914449]	1109	124.871287128712	114.046594982078	114.003610108303	114.348314606741	114.872659176029	202	279	277	178	267	0.300587108093573
ENSMUST00000237792.1	ENSMUSG00000024346	Pfdn1	prefoldin 1 [Source:MGI Symbol;Acc:MGI:1914449]	1024	82.25	96.6315789473684	104.260869565217	83.8823529411764	87.625	12	19	23	17	8	0.814601882178623
ENSMUST00000026425.12	ENSMUSG00000025364	Pa2g4	proliferation-associated 2G4 [Source:MGI Symbol;Acc:MGI:894684]	2432	146.40366972477	145.310606060606	150.704918032786	136.638888888888	138.116071428571	109	132	122	72	112	0.534890859434478
ENSMUST00000131728.3	ENSMUSG00000025364	Pa2g4	proliferation-associated 2G4 [Source:MGI Symbol;Acc:MGI:894684]	2483	136.389312977099	123.819444444444	134.316176470588	132.738636363636	138.558139534883	131	144	136	88	129	0.398553819052374
ENSMUST00000009256.3	ENSMUSG00000009112	Bcl2l13	BCL2-like 13 (apoptosis facilitator) [Source:MGI Symbol;Acc:MGI:2136959]	6925	133.051282051282	136.379629629629	142.367088607594	142.220588235294	135.268817204301	117	108	79	68	93	0.207400577811427
ENSMUST00000042857.13	ENSMUSG00000038331	Satb2	special AT-rich sequence binding protein 2 [Source:MGI Symbol;Acc:MGI:2679336]	6277	185.754385964912	185.351851851851	181.1	170.117647058823	159.949152542372	57	54	50	51	59	0.150199334853796
ENSMUST00000114415.9	ENSMUSG00000038331	Satb2	special AT-rich sequence binding protein 2 [Source:MGI Symbol;Acc:MGI:2679336]	5805	172.090909090909	173.6	168.285714285714	159.421052631578	151.09375	22	25	35	19	32	0.131616872349045
ENSMUST00000177424.1	ENSMUSG00000038331	Satb2	special AT-rich sequence binding protein 2 [Source:MGI Symbol;Acc:MGI:2679336]	4694	160.2	189.545454545454	202.5	155	168.857142857142	10	11	10	6	7	0.979940905507156
ENSMUST00000210005.1	ENSMUSG00000019139	Isyna1	myo-inositol 1-phosphate synthase A1 [Source:MGI Symbol;Acc:MGI:1919030]	1914	140.408163265306	142.970588235294	140.333333333333	122.55	115.444444444444	49	34	36	20	18	0.203183143546564
ENSMUST00000210878.1	ENSMUSG00000019139	Isyna1	myo-inositol 1-phosphate synthase A1 [Source:MGI Symbol;Acc:MGI:1919030]	1916	256.35	232.736842105263	248.95	271.333333333333	274	20	19	20	9	20	0.231497638603357
ENSMUST00000019283.9	ENSMUSG00000019139	Isyna1	myo-inositol 1-phosphate synthase A1 [Source:MGI Symbol;Acc:MGI:1919030]	1836	136.31506849315	135.382352941176	150.354838709677	150.26923076923	146.833333333333	73	68	62	52	78	0.00324497017505688
ENSMUST00000111908.2	ENSMUSG00000041445	Mmrn2	multimerin 2 [Source:MGI Symbol;Acc:MGI:2385618]	3974	112.65	123.083333333333	111	125	109.333333333333	20	12	12	3	9	0.737704860188463
ENSMUST00000238198.1	ENSMUSG00000026614	Slc30a10	solute carrier family 30, member 10 [Source:MGI Symbol;Acc:MGI:2685058]	3506	168.714285714285	169.5	143.6	154.5	205	7	8	5	2	5	0.957670983776512
ENSMUST00000061093.6	ENSMUSG00000026614	Slc30a10	solute carrier family 30, member 10 [Source:MGI Symbol;Acc:MGI:2685058]	5836	203	160.869565217391	133	114.727272727272	156.65	17	23	22	11	20	0.123545572732551
ENSMUST00000238677.1	ENSMUSG00000026614	Slc30a10	solute carrier family 30, member 10 [Source:MGI Symbol;Acc:MGI:2685058]	5684	171.857142857142	175.75	170.785714285714	142.6	179.5	7	20	14	5	8	0.557485471900464
ENSMUST00000025830.8	ENSMUSG00000024897	Apba1	amyloid beta (A4) precursor protein binding, family A, member 1 [Source:MGI Symbol;Acc:MGI:1860297]	6620	156.558441558441	162.477611940298	147.847290640394	155.513157894736	150.184357541899	231	268	203	152	179	0.107553635625439
ENSMUST00000137496.9	ENSMUSG00000048280	Zfp738	zinc finger protein 738 [Source:MGI Symbol;Acc:MGI:3040706]	13215	174.1	158.653846153846	174.888888888888	154	156.51724137931	20	26	18	14	29	0.686040224721208
ENSMUST00000030181.11	ENSMUSG00000028461	Ccdc107	coiled-coil domain containing 107 [Source:MGI Symbol;Acc:MGI:1913423]	817	98.1098901098901	100.342105263157	108.978021978021	104.121212121212	104.815533980582	91	114	91	66	103	0.050439208614085
ENSMUST00000107922.2	ENSMUSG00000028461	Ccdc107	coiled-coil domain containing 107 [Source:MGI Symbol;Acc:MGI:1913423]	865	292.8	288.75	274.166666666666	231.333333333333	219.25	5	4	6	6	4	0.106797273208424
ENSMUST00000017920.13	ENSMUSG00000017776	Crk	v-crk avian sarcoma virus CT10 oncogene homolog [Source:MGI Symbol;Acc:MGI:88508]	3642	155.84	157.867256637168	155.282051282051	148.933333333333	160.871794871794	75	113	78	60	78	0.713263257473856
ENSMUST00000108425.7	ENSMUSG00000017776	Crk	v-crk avian sarcoma virus CT10 oncogene homolog [Source:MGI Symbol;Acc:MGI:88508]	4290	149.34962406015	152.281632653061	154.8125	145.102702702702	152.75652173913	266	245	256	185	230	0.986114066566651
ENSMUST00000165123.7	ENSMUSG00000024576	Csnk1a1	casein kinase 1, alpha 1 [Source:MGI Symbol;Acc:MGI:1934950]	4083	144.837988826815	149.555858310626	145.533333333333	151.586046511627	154.264615384615	358	367	315	215	325	0.450159893661821
ENSMUST00000165721.7	ENSMUSG00000024576	Csnk1a1	casein kinase 1, alpha 1 [Source:MGI Symbol;Acc:MGI:1934950]	2323	154.087248322147	157.606299212598	154.483333333333	153.791666666666	147.026143790849	149	127	120	72	153	0.309064276749668
ENSMUST00000163205.7	ENSMUSG00000024576	Csnk1a1	casein kinase 1, alpha 1 [Source:MGI Symbol;Acc:MGI:1934950]	3204	135.8	210.714285714285	239.333333333333	104	204.6	5	7	6	3	5	0.884398032298903
ENSMUST00000170862.7	ENSMUSG00000024576	Csnk1a1	casein kinase 1, alpha 1 [Source:MGI Symbol;Acc:MGI:1934950]	2259	149.192307692307	157.74074074074	148.108695652173	129.90625	160.268656716417	52	54	46	32	67	0.577250433280665
ENSMUST00000031250.13	ENSMUSG00000029310	Nudt9	nudix (nucleoside diphosphate linked moiety X)-type motif 9 [Source:MGI Symbol;Acc:MGI:1921417]	1488	123.715328467153	118.937931034482	114.723880597014	109.865384615384	115.785276073619	137	145	134	104	163	0.0758895277440614
ENSMUST00000189644.6	ENSMUSG00000021103	Mnat1	menage a trois 1 [Source:MGI Symbol;Acc:MGI:106207]	1294	142.333333333333	192	165.333333333333	99	133.75	6	6	3	3	4	0.345774105186675
ENSMUST00000021523.6	ENSMUSG00000021103	Mnat1	menage a trois 1 [Source:MGI Symbol;Acc:MGI:106207]	2505	128.79365079365	146.265625	120.086206896551	127.076923076923	151.644444444444	63	64	58	39	45	0.763821352928932
ENSMUST00000025363.6	ENSMUSG00000024486	Hbegf	heparin-binding EGF-like growth factor [Source:MGI Symbol;Acc:MGI:96070]	2375	148.764705882352	135.486486486486	122.85294117647	129.75	127.261904761904	34	37	34	20	42	0.0694086520093313
ENSMUST00000056045.4	ENSMUSG00000047221	Fam185a	family with sequence similarity 185, member A [Source:MGI Symbol;Acc:MGI:2140983]	3027	172.522727272727	160.883720930232	154.535714285714	147.631578947368	170.272727272727	44	43	28	19	22	0.410806087621266
ENSMUST00000115320.7	ENSMUSG00000039841	Zfp800	zinc finger protein 800 [Source:MGI Symbol;Acc:MGI:1889334]	4311	159.25	187.5	121.8	149.5	172.5	12	14	10	12	12	0.324786710386898
ENSMUST00000033991.12	ENSMUSG00000031583	Wrn	Werner syndrome RecQ like helicase [Source:MGI Symbol;Acc:MGI:109635]	6262	183.461538461538	252.076923076923	192.230769230769	191.75	189.333333333333	13	13	13	4	18	0.374124288318121
ENSMUST00000069292.13	ENSMUSG00000030145	Zfp248	zinc finger protein 248 [Source:MGI Symbol;Acc:MGI:1919970]	3683	150.032258064516	151.5625	126.125	173.615384615384	130.857142857142	31	32	32	13	21	0.734327001338991
ENSMUST00000189168.1	ENSMUSG00000030145	Zfp248	zinc finger protein 248 [Source:MGI Symbol;Acc:MGI:1919970]	1615	108.76923076923	132.066666666666	76.45	110	105.777777777777	13	15	20	9	9	0.249514572739707
ENSMUST00000076635.12	ENSMUSG00000036916	Zfp280c	zinc finger protein 280C [Source:MGI Symbol;Acc:MGI:2387585]	4355	262.444444444444	322.2	290.75	332	228.142857142857	9	10	4	4	7	0.858848073261773
ENSMUST00000088898.10	ENSMUSG00000036916	Zfp280c	zinc finger protein 280C [Source:MGI Symbol;Acc:MGI:2387585]	4024	262.75	289.833333333333	259.25	197.285714285714	95.5	8	6	8	7	2	0.235990585304012
ENSMUST00000072292.11	ENSMUSG00000036916	Zfp280c	zinc finger protein 280C [Source:MGI Symbol;Acc:MGI:2387585]	4045	249	270.6	347.625	250.333333333333	276.923076923076	8	10	8	6	13	0.467299920613126
ENSMUST00000168520.2	ENSMUSG00000025436	Atp23	ATP23 metallopeptidase and ATP synthase assembly factor homolog [Source:MGI Symbol;Acc:MGI:1916984]	1043	132.307692307692	156.74074074074	144.764705882352	148.571428571428	99.4166666666666	26	27	17	14	12	0.585258839594928
ENSMUST00000025137.8	ENSMUSG00000024287	Thoc1	THO complex 1 [Source:MGI Symbol;Acc:MGI:1919668]	4134	165.583333333333	176.469696969696	148.375	176.877551020408	162.645833333333	72	66	72	49	48	0.513902544634131
ENSMUST00000234901.1	ENSMUSG00000024287	Thoc1	THO complex 1 [Source:MGI Symbol;Acc:MGI:1919668]	1875	273.863636363636	286.714285714285	290.2	242.714285714285	240.117647058823	22	14	10	7	17	0.371212924576927
ENSMUST00000005067.5	ENSMUSG00000004937	Sgta	small glutamine-rich tetratricopeptide repeat (TPR)-containing, alpha [Source:MGI Symbol;Acc:MGI:1098703]	1969	119.462686567164	136.575	117.458563535911	133.009174311926	127.708333333333	134	160	181	109	168	0.835900456551582
ENSMUST00000218208.1	ENSMUSG00000004937	Sgta	small glutamine-rich tetratricopeptide repeat (TPR)-containing, alpha [Source:MGI Symbol;Acc:MGI:1098703]	1964	123.638095238095	134.817391304347	128.608695652173	120.71875	131.981818181818	105	115	115	96	110	0.746421264547115
ENSMUST00000139129.8	ENSMUSG00000018379	Srsf1	serine/arginine-rich splicing factor 1 [Source:MGI Symbol;Acc:MGI:98283]	5362	181.615384615384	175.045045045045	170.544554455445	172.6	179.926605504587	104	111	101	70	109	0.434646559830281
ENSMUST00000079866.10	ENSMUSG00000018379	Srsf1	serine/arginine-rich splicing factor 1 [Source:MGI Symbol;Acc:MGI:98283]	2948	232.3125	202.285714285714	190.7	162	236.666666666666	16	14	10	11	6	0.539950384465311
ENSMUST00000134824.8	ENSMUSG00000018379	Srsf1	serine/arginine-rich splicing factor 1 [Source:MGI Symbol;Acc:MGI:98283]	896	300.380952380952	227.2	204.555555555555	271.3	329.777777777777	21	20	9	10	18	0.935492503041214
ENSMUST00000040182.12	ENSMUSG00000032740	Ccdc88a	coiled coil domain containing 88A [Source:MGI Symbol;Acc:MGI:1925177]	9376	173.048780487804	184.4375	169.464788732394	184.152173913043	182.20652173913	82	80	71	46	92	0.98638559029387
ENSMUST00000032841.6	ENSMUSG00000030612	Mrpl46	mitochondrial ribosomal protein L46 [Source:MGI Symbol;Acc:MGI:1914558]	1134	104.627906976744	123.567375886524	105.775193798449	112.678571428571	121.809523809523	129	141	129	112	147	0.946359297695816
ENSMUST00000080065.2	ENSMUSG00000059316	Slc27a4	solute carrier family 27 (fatty acid transporter), member 4 [Source:MGI Symbol;Acc:MGI:1347347]	4054	125.564705882352	125.046357615894	121.03861003861	121.76	124.76862745098	255	302	259	175	255	0.158044724736547
ENSMUST00000226988.2	ENSMUSG00000022607	Ptk2	PTK2 protein tyrosine kinase 2 [Source:MGI Symbol;Acc:MGI:95481]	4675	166.190082644628	164.449275362318	157.684210526315	167.670731707317	166.377358490566	121	138	95	82	106	0.75377493826255
ENSMUST00000239146.1	ENSMUSG00000022607	Ptk2	PTK2 protein tyrosine kinase 2 [Source:MGI Symbol;Acc:MGI:95481]	4540	184.622222222222	172.160714285714	177.916666666666	181.8	158.290909090909	45	56	48	25	55	0.62299523349059
ENSMUST00000110036.10	ENSMUSG00000022607	Ptk2	PTK2 protein tyrosine kinase 2 [Source:MGI Symbol;Acc:MGI:95481]	4417	176.127272727272	159.090909090909	138.348837209302	156	164.929824561403	55	66	43	27	57	0.310172026353008
ENSMUST00000233645.1	ENSMUSG00000062078	Qk	quaking [Source:MGI Symbol;Acc:MGI:97837]	8547	168.174418604651	170.59420289855	138.31343283582	147.428571428571	163.466666666666	86	69	67	42	75	0.131400815927039
ENSMUST00000097414.10	ENSMUSG00000062078	Qk	quaking [Source:MGI Symbol;Acc:MGI:97837]	5832	163.827586206896	163.133333333333	160.208333333333	195.176470588235	155.538461538461	29	30	24	17	26	0.700934715424335
ENSMUST00000042296.8	ENSMUSG00000062078	Qk	quaking [Source:MGI Symbol;Acc:MGI:97837]	6737	159.402714932126	177.169642857142	169.846153846153	158.388888888888	171.480952380952	221	224	221	144	210	0.852941013280496
ENSMUST00000233828.1	ENSMUSG00000062078	Qk	quaking [Source:MGI Symbol;Acc:MGI:97837]	5428	195.356164383561	192.875	177.196078431372	191.531914893617	194.142857142857	73	56	51	47	49	0.413996001693823
ENSMUST00000220578.1	ENSMUSG00000073079	Srp54a	signal recognition particle 54A [Source:MGI Symbol;Acc:MGI:1346087]	4498	143.060402684563	132.630434782608	133.364406779661	128.572192513368	128.142857142857	298	276	236	187	210	0.176956288362369
ENSMUST00000032840.4	ENSMUSG00000030611	Mrps11	mitochondrial ribosomal protein S11 [Source:MGI Symbol;Acc:MGI:1915244]	1056	134.627118644067	116.310924369747	113.008771929824	123.353658536585	122.641791044776	118	119	114	82	134	0.524230064393547
ENSMUST00000133553.7	ENSMUSG00000030611	Mrps11	mitochondrial ribosomal protein S11 [Source:MGI Symbol;Acc:MGI:1915244]	825	160.823529411764	105.666666666666	115.212121212121	140.25	129.347826086956	17	24	33	12	23	0.839790628140764
ENSMUST00000020150.9	ENSMUSG00000019975	Ikbip	IKBKB interacting protein [Source:MGI Symbol;Acc:MGI:1914704]	1328	133.970588235294	126.30303030303	119.95652173913	98.3333333333333	101.322580645161	34	33	23	27	31	0.0826193594496731
ENSMUST00000020149.5	ENSMUSG00000019975	Ikbip	IKBKB interacting protein [Source:MGI Symbol;Acc:MGI:1914704]	3232	180.8	136.222222222222	132.375	79.5	118.5	5	9	8	2	8	0.163469612221075
ENSMUST00000058476.13	ENSMUSG00000033510	Otud7a	OTU domain containing 7A [Source:MGI Symbol;Acc:MGI:2158505]	3483	130.033898305084	133.242424242424	131.045454545454	118.477272727272	119.925373134328	59	66	44	44	67	0.205162198642323
ENSMUST00000084628.4	ENSMUSG00000046321	Hs3st2	heparan sulfate (glucosamine) 3-O-sulfotransferase 2 [Source:MGI Symbol;Acc:MGI:1333802]	2278	122.891428571428	121.412844036697	123.806603773584	126.240259740259	116.538461538461	175	218	212	154	221	0.991692693715926
ENSMUST00000087948.10	ENSMUSG00000079487	Med12	mediator complex subunit 12 [Source:MGI Symbol;Acc:MGI:1926212]	6809	230.6	242.222222222222	239	206.666666666666	223.619047619047	20	18	5	6	21	0.374967356176851
ENSMUST00000148846.7	ENSMUSG00000079487	Med12	mediator complex subunit 12 [Source:MGI Symbol;Acc:MGI:1926212]	3273	286.555555555555	389.5	190	214	195.8	9	2	5	2	5	0.0395533428199515
ENSMUST00000067912.7	ENSMUSG00000055148	Klf2	Kruppel-like factor 2 (lung) [Source:MGI Symbol;Acc:MGI:1342772]	1847	158.098039215686	146.552	146	122.684210526315	152.95	102	125	85	57	80	0.41798082900114
ENSMUST00000028781.8	ENSMUSG00000027312	Atrn	attractin [Source:MGI Symbol;Acc:MGI:1341628]	8745	168.093333333333	163.919254658385	164.462809917355	160.588235294117	157.494736842105	300	322	242	170	285	0.187460112676289
ENSMUST00000038107.8	ENSMUSG00000039910	Cited2	Cbp/p300-interacting transactivator, with Glu/Asp-rich carboxy-terminal domain, 2 [Source:MGI Symbol;Acc:MGI:1306784]	1979	136.295454545454	132.095	138.741463414634	135.761904761904	131.904761904761	176	200	205	126	168	0.699321849637334
ENSMUST00000045388.7	ENSMUSG00000039246	Lyplal1	lysophospholipase-like 1 [Source:MGI Symbol;Acc:MGI:2385115]	1578	135.447368421052	141.533333333333	127.275862068965	191.125	134.642857142857	38	30	29	16	28	0.66455026267511
ENSMUST00000026866.14	ENSMUSG00000059834	Sclt1	sodium channel and clathrin linker 1 [Source:MGI Symbol;Acc:MGI:1914411]	3005	240	215.55	237.066666666666	191.25	179.571428571428	17	20	15	8	21	0.37881759867832
ENSMUST00000126971.7	ENSMUSG00000030428	Ttyh1	tweety family member 1 [Source:MGI Symbol;Acc:MGI:1889007]	2513	130	162	98.6	142	52.5	2	6	10	3	4	0.266068356283221
ENSMUST00000119661.7	ENSMUSG00000030428	Ttyh1	tweety family member 1 [Source:MGI Symbol;Acc:MGI:1889007]	2512	124.090163934426	113.327272727272	119.836879432624	126.123456790123	118.314285714285	122	110	141	81	105	0.628706123562337
ENSMUST00000129423.7	ENSMUSG00000030428	Ttyh1	tweety family member 1 [Source:MGI Symbol;Acc:MGI:1889007]	4355	144.553895410885	139.685602350636	134.437751004016	132.290423861852	138.537777777777	937	1021	996	637	900	0.0995542433147666
ENSMUST00000079415.11	ENSMUSG00000030428	Ttyh1	tweety family member 1 [Source:MGI Symbol;Acc:MGI:1889007]	2882	158.5	154.289855072463	135.969387755102	150.355263157894	140.836538461538	122	138	98	76	104	0.0902011598265332
ENSMUST00000032594.12	ENSMUSG00000030428	Ttyh1	tweety family member 1 [Source:MGI Symbol;Acc:MGI:1889007]	2713	131.872881355932	142.280303030303	139.747747747747	131.324324324324	131.121212121212	118	132	111	74	99	0.612075237929182
ENSMUST00000134536.7	ENSMUSG00000030428	Ttyh1	tweety family member 1 [Source:MGI Symbol;Acc:MGI:1889007]	2649	123.35294117647	128.209876543209	118.733333333333	128.25	123.483870967741	68	81	75	56	62	0.60516590523839
ENSMUST00000206869.1	ENSMUSG00000030428	Ttyh1	tweety family member 1 [Source:MGI Symbol;Acc:MGI:1889007]	1491	136.875	165.709677419354	122.46875	134	123.346153846153	16	31	32	16	26	0.126720414858148
ENSMUST00000094077.4	ENSMUSG00000018476	Kdm6b	KDM1 lysine (K)-specific demethylase 6B [Source:MGI Symbol;Acc:MGI:2448492]	6654	231.388888888888	249.105263157894	181.75	201.2	229.933333333333	18	19	8	10	15	0.158409143955501
ENSMUST00000027700.14	ENSMUSG00000026439	Rbbp5	retinoblastoma binding protein 5, histone lysine methyltransferase complex subunit [Source:MGI Symbol;Acc:MGI:1918367]	3385	168.186666666666	167.90625	159.60465116279	154.489795918367	167.440476190476	75	96	86	49	84	0.219046552533911
ENSMUST00000187834.1	ENSMUSG00000026439	Rbbp5	retinoblastoma binding protein 5, histone lysine methyltransferase complex subunit [Source:MGI Symbol;Acc:MGI:1918367]	1923	239.2	238.266666666666	217.571428571428	245.666666666666	229	15	15	7	6	4	0.50353470944977
ENSMUST00000102508.9	ENSMUSG00000028745	Capzb	capping protein (actin filament) muscle Z-line, beta [Source:MGI Symbol;Acc:MGI:104652]	1674	111.123422159887	113.011251758087	112.170694864048	115.046413502109	113.271186440677	713	711	662	474	649	0.348936461520516
ENSMUST00000102507.9	ENSMUSG00000028745	Capzb	capping protein (actin filament) muscle Z-line, beta [Source:MGI Symbol;Acc:MGI:104652]	1702	113.323529411764	110.628571428571	117.232142857142	110.75	111.863636363636	68	70	56	44	66	0.669687492964163
ENSMUST00000150077.1	ENSMUSG00000028745	Capzb	capping protein (actin filament) muscle Z-line, beta [Source:MGI Symbol;Acc:MGI:104652]	1559	118.777777777777	151.30303030303	127.9	119.95652173913	117.54054054054	27	33	30	23	37	0.376241899265126
ENSMUST00000030518.15	ENSMUSG00000028745	Capzb	capping protein (actin filament) muscle Z-line, beta [Source:MGI Symbol;Acc:MGI:104652]	1390	117.166666666666	133.6	105.76923076923	64	142.875	6	10	13	1	8	0.531827153406305
ENSMUST00000042675.8	ENSMUSG00000028745	Capzb	capping protein (actin filament) muscle Z-line, beta [Source:MGI Symbol;Acc:MGI:104652]	1604	147.142857142857	107.636363636363	126.529411764705	139.777777777777	127.166666666666	14	22	17	9	6	0.82622476780184
ENSMUST00000097888.9	ENSMUSG00000041530	Ago1	argonaute RISC catalytic subunit 1 [Source:MGI Symbol;Acc:MGI:2446630]	7227	192.95238095238	186.340206185567	172.776119402985	171.075471698113	165.179487179487	84	97	67	53	78	0.0140190360644561
ENSMUST00000056470.9	ENSMUSG00000055560	Zfp459	zinc finger protein 459 [Source:MGI Symbol;Acc:MGI:3040701]	3334	125.571428571428	189	182.142857142857	140	143.222222222222	7	6	7	1	9	0.945959384401543
ENSMUST00000132855.7	ENSMUSG00000086040	Wipf3	WAS/WASL interacting protein family, member 3 [Source:MGI Symbol;Acc:MGI:3044681]	4516	150.818181818181	154.421875	144.66037735849	159.794871794871	156.75	66	64	53	39	64	0.866954988348791
ENSMUST00000126637.7	ENSMUSG00000086040	Wipf3	WAS/WASL interacting protein family, member 3 [Source:MGI Symbol;Acc:MGI:3044681]	4414	162.5625	139.813559322033	158.462962962962	131.354166666666	147.35294117647	48	59	54	48	51	0.707330732809149
ENSMUST00000163746.7	ENSMUSG00000086040	Wipf3	WAS/WASL interacting protein family, member 3 [Source:MGI Symbol;Acc:MGI:3044681]	4102	154.064516129032	149.073529411764	156.243243243243	126.491803278688	163.298850574712	93	68	74	61	87	0.856451610750839
ENSMUST00000172046.1	ENSMUSG00000086040	Wipf3	WAS/WASL interacting protein family, member 3 [Source:MGI Symbol;Acc:MGI:3044681]	4204	153.494736842105	147.58	157.504950495049	140.737704918032	160.153846153846	95	50	101	61	78	0.799468784063874
ENSMUST00000174552.7	ENSMUSG00000048264	Dip2c	disco interacting protein 2 homolog C [Source:MGI Symbol;Acc:MGI:1920179]	8023	154.366666666666	155.923809523809	166.18691588785	151.337209302325	159.021052631578	120	105	107	86	95	0.553401807743407
ENSMUST00000002699.6	ENSMUSG00000024045	Akap8	A kinase (PRKA) anchor protein 8 [Source:MGI Symbol;Acc:MGI:1928488]	3731	211.677419354838	228.948717948717	177.888888888888	231.045454545454	218.038461538461	31	39	27	22	26	0.636913390003811
ENSMUST00000235205.1	ENSMUSG00000024045	Akap8	A kinase (PRKA) anchor protein 8 [Source:MGI Symbol;Acc:MGI:1928488]	4183	228.318181818181	212.137931034482	188.391304347826	222.6	191.4375	22	29	23	15	16	0.295077445075507
ENSMUST00000237103.1	ENSMUSG00000024045	Akap8	A kinase (PRKA) anchor protein 8 [Source:MGI Symbol;Acc:MGI:1928488]	4071	247.692307692307	270.333333333333	219	253.733333333333	225.727272727272	13	15	9	15	22	0.202570886408221
ENSMUST00000237381.1	ENSMUSG00000024045	Akap8	A kinase (PRKA) anchor protein 8 [Source:MGI Symbol;Acc:MGI:1928488]	4570	248.666666666666	229.32	229.222222222222	228.9	252.2	36	25	9	10	25	0.868256572103356
ENSMUST00000194563.5	ENSMUSG00000026116	Tmem131	transmembrane protein 131 [Source:MGI Symbol;Acc:MGI:1927110]	6698	168.5	185.469879518072	174.25641025641	174.315789473684	173.830508474576	64	83	39	38	59	0.682893854364075
ENSMUST00000027290.11	ENSMUSG00000026116	Tmem131	transmembrane protein 131 [Source:MGI Symbol;Acc:MGI:1927110]	6546	180.484375	178.513888888888	147.595744680851	194.157894736842	163.807692307692	64	72	47	38	52	0.577644241085481
ENSMUST00000078222.8	ENSMUSG00000000308	Ckmt1	creatine kinase, mitochondrial 1, ubiquitous [Source:MGI Symbol;Acc:MGI:99441]	1518	108.96875	118.37912087912	120.38961038961	108.078431372549	122.630136986301	192	182	154	102	146	0.655802320531671
ENSMUST00000000317.12	ENSMUSG00000000308	Ckmt1	creatine kinase, mitochondrial 1, ubiquitous [Source:MGI Symbol;Acc:MGI:99441]	1620	116.874715261959	109.884328358208	116.753846153846	115.022082018927	120.563909774436	439	536	390	317	399	0.312113888939695
ENSMUST00000153040.1	ENSMUSG00000000308	Ckmt1	creatine kinase, mitochondrial 1, ubiquitous [Source:MGI Symbol;Acc:MGI:99441]	422	81.4285714285714	124	138.583333333333	109.333333333333	154.111111111111	7	10	12	3	9	0.270384834161264
ENSMUST00000071400.12	ENSMUSG00000045031	Cetn4	centrin 4 [Source:MGI Symbol;Acc:MGI:2677454]	1808	150.428571428571	91.4	117.5	182.2	117.571428571428	7	5	10	5	7	0.643708061646338
ENSMUST00000102955.10	ENSMUSG00000045031	Cetn4	centrin 4 [Source:MGI Symbol;Acc:MGI:2677454]	1064	127.354838709677	132.137931034482	115.233333333333	130.083333333333	116.263157894736	31	29	30	12	19	0.247226096315594
ENSMUST00000140956.7	ENSMUSG00000045031	Cetn4	centrin 4 [Source:MGI Symbol;Acc:MGI:2677454]	2981	161.75	138.25	78.5	119.8	134	8	4	4	5	4	0.189481243818048
ENSMUST00000075537.6	ENSMUSG00000045031	Cetn4	centrin 4 [Source:MGI Symbol;Acc:MGI:2677454]	762	75.4285714285714	99.5	127	129.111111111111	142	7	10	7	9	6	0.0249370868626166
ENSMUST00000180502.7	ENSMUSG00000096916	Zfp850	zinc finger protein 850 [Source:MGI Symbol;Acc:MGI:3036281]	6163	174.307692307692	159.642857142857	183.75	154.875	153.384615384615	13	14	12	8	13	0.844175472562877
ENSMUST00000182569.1	ENSMUSG00000035325	Sec31a	Sec31 homolog A (S. cerevisiae) [Source:MGI Symbol;Acc:MGI:1916412]	1686	131	160.375	161.833333333333	123.125	135.222222222222	11	8	6	8	9	0.779457752482017
ENSMUST00000094578.10	ENSMUSG00000035325	Sec31a	Sec31 homolog A (S. cerevisiae) [Source:MGI Symbol;Acc:MGI:1916412]	4228	127.386075949367	146.165803108808	130.639639639639	124.290322580645	130.62937062937	158	193	111	124	143	0.35205638251417
ENSMUST00000182433.7	ENSMUSG00000035325	Sec31a	Sec31 homolog A (S. cerevisiae) [Source:MGI Symbol;Acc:MGI:1916412]	1195	165.68	162.222222222222	122.105263157894	143	119	25	18	19	8	20	0.0352518460778402
ENSMUST00000182886.7	ENSMUSG00000035325	Sec31a	Sec31 homolog A (S. cerevisiae) [Source:MGI Symbol;Acc:MGI:1916412]	4047	130.884615384615	145.038461538461	119.818181818181	145.45	136.555555555555	26	26	22	20	27	0.73993267259068
ENSMUST00000077367.10	ENSMUSG00000028048	Gba	glucosidase, beta, acid [Source:MGI Symbol;Acc:MGI:95665]	1779	127.941176470588	135.811320754716	132.465116279069	108.615384615384	117.733333333333	34	53	43	26	45	0.284368127821811
ENSMUST00000167998.1	ENSMUSG00000028048	Gba	glucosidase, beta, acid [Source:MGI Symbol;Acc:MGI:95665]	1938	123.666666666666	152.638888888888	119.37037037037	101.5625	153.208333333333	36	36	27	16	24	0.589833075863934
ENSMUST00000196887.1	ENSMUSG00000028048	Gba	glucosidase, beta, acid [Source:MGI Symbol;Acc:MGI:95665]	662	169	111.428571428571	253.5	NA	117.714285714285	6	7	4	0	7	0.600904341702215
ENSMUST00000137627.1	ENSMUSG00000037606	Osbpl5	oxysterol binding protein-like 5 [Source:MGI Symbol;Acc:MGI:1930265]	1917	183.75	227	180.4	131	135.285714285714	8	5	5	5	14	0.118185163252124
ENSMUST00000119499.7	ENSMUSG00000037606	Osbpl5	oxysterol binding protein-like 5 [Source:MGI Symbol;Acc:MGI:1930265]	3775	139.777777777777	168.216216216216	149.193548387096	133.541666666666	196.558823529411	27	37	31	24	34	0.842562484544725
ENSMUST00000020411.13	ENSMUSG00000037606	Osbpl5	oxysterol binding protein-like 5 [Source:MGI Symbol;Acc:MGI:1930265]	3994	189.692307692307	160.36	170.428571428571	111.733333333333	141.117647058823	13	25	14	15	17	0.259355681503195
ENSMUST00000092096.13	ENSMUSG00000047879	Usp14	ubiquitin specific peptidase 14 [Source:MGI Symbol;Acc:MGI:1928898]	4726	151.940092165898	159.628117913832	150.503703703703	152.715753424657	153.520286396181	434	441	405	292	419	0.335691685808736
ENSMUST00000116669.1	ENSMUSG00000047879	Usp14	ubiquitin specific peptidase 14 [Source:MGI Symbol;Acc:MGI:1928898]	2019	132.386554621848	158.478632478632	146.205607476635	145.025316455696	147.939655172413	119	117	107	79	116	0.928213319498259
ENSMUST00000161170.1	ENSMUSG00000072623	Zfp9	zinc finger protein 9 [Source:MGI Symbol;Acc:MGI:99210]	3968	191.788461538461	185.096153846153	162.217391304347	159.967741935483	156.307692307692	52	52	46	31	39	0.00323588906804021
ENSMUST00000095132.9	ENSMUSG00000037708	Spag6	sperm associated antigen 6 [Source:MGI Symbol;Acc:MGI:3040687]	2458	96	156.75	94.3333333333333	115.75	186.833333333333	5	4	6	4	6	0.898111417031865
ENSMUST00000002808.6	ENSMUSG00000002731	Prkra	protein kinase, interferon inducible double stranded RNA dependent activator [Source:MGI Symbol;Acc:MGI:1344375]	1614	149.953125	144.337837837837	149	140.575	144.528301886792	64	74	42	40	53	0.563426205286049
ENSMUST00000221877.1	ENSMUSG00000036613	Eipr1	EARP complex and GARP complex interacting protein 1 [Source:MGI Symbol;Acc:MGI:1289332]	4091	142.675	138.763313609467	134.148760330578	131.6	141.25	120	169	121	90	132	0.295983179947557
ENSMUST00000035657.8	ENSMUSG00000036613	Eipr1	EARP complex and GARP complex interacting protein 1 [Source:MGI Symbol;Acc:MGI:1289332]	1747	143	160.192307692307	152	122.888888888888	155.451612903225	30	26	30	18	31	0.620056677308372
ENSMUST00000105473.2	ENSMUSG00000038602	Slc35f1	solute carrier family 35, member F1 [Source:MGI Symbol;Acc:MGI:2139810]	4941	133.133802816901	147.78102189781	134.869158878504	128.336842105263	128	142	137	107	95	117	0.20191169375564
ENSMUST00000108112.9	ENSMUSG00000027722	Spata5	spermatogenesis associated 5 [Source:MGI Symbol;Acc:MGI:1927170]	3295	173.857142857142	184	160.333333333333	145.75	133.875	7	5	6	8	8	0.0553523227829695
ENSMUST00000198968.1	ENSMUSG00000027722	Spata5	spermatogenesis associated 5 [Source:MGI Symbol;Acc:MGI:1927170]	2916	157.76923076923	141.785714285714	104.857142857142	153.666666666666	164.9	13	14	7	12	10	0.748036674172311
ENSMUST00000053024.7	ENSMUSG00000043445	Pgp	phosphoglycolate phosphatase [Source:MGI Symbol;Acc:MGI:1914328]	2627	119.847826086956	124.511173184357	122.383561643835	119.654166666666	127.108552631578	322	358	292	240	304	0.809564711260026
ENSMUST00000234216.1	ENSMUSG00000043445	Pgp	phosphoglycolate phosphatase [Source:MGI Symbol;Acc:MGI:1914328]	2428	118.266666666666	118.810344827586	122.568965517241	106	124.396551724137	60	58	58	35	58	0.914332297769801
ENSMUST00000162022.7	ENSMUSG00000052942	Glis3	GLIS family zinc finger 3 [Source:MGI Symbol;Acc:MGI:2444289]	7514	175.5	113	NA	142.833333333333	156.5	6	9	0	6	4	0.881113185502484
ENSMUST00000063694.9	ENSMUSG00000052040	Klf13	Kruppel-like factor 13 [Source:MGI Symbol;Acc:MGI:1354948]	6396	166.772020725388	158.655172413793	156.258064516129	144.093220338983	164.714285714285	193	145	155	118	154	0.422298734347767
ENSMUST00000053713.4	ENSMUSG00000044030	Irf2bp1	interferon regulatory factor 2 binding protein 1 [Source:MGI Symbol;Acc:MGI:2442159]	2734	121.350785340314	121.560975609756	127.913907284768	108.445205479452	128.1015625	191	164	151	146	128	0.997292266256316
ENSMUST00000032568.13	ENSMUSG00000030409	Dmpk	dystrophia myotonica-protein kinase [Source:MGI Symbol;Acc:MGI:94906]	2761	167.181818181818	143.153846153846	159.166666666666	164	170.666666666666	11	13	6	4	6	0.411990820641108
ENSMUST00000078058.4	ENSMUSG00000049184	Purg	purine-rich element binding protein G [Source:MGI Symbol;Acc:MGI:1922279]	1795	180.352112676056	169.674418604651	152.828125	180.883720930232	182.537313432835	71	43	64	43	67	0.836946852515903
ENSMUST00000063663.5	ENSMUSG00000026156	B3gat2	beta-1,3-glucuronyltransferase 2 (glucuronosyltransferase S) [Source:MGI Symbol;Acc:MGI:2389490]	5655	131.22619047619	124.743902439024	132.4125	150.978260869565	139.024390243902	84	82	80	46	82	0.182405014188495
ENSMUST00000042780.13	ENSMUSG00000040548	Tex2	testis expressed gene 2 [Source:MGI Symbol;Acc:MGI:102465]	4934	163.894736842105	141.55905511811	140.728155339805	133.866666666666	147.51923076923	133	127	103	75	104	0.305608724461864
ENSMUST00000207249.1	ENSMUSG00000040548	Tex2	testis expressed gene 2 [Source:MGI Symbol;Acc:MGI:102465]	3092	152.666666666666	154	141.8	138.333333333333	168	6	7	10	6	4	0.765220639347345
ENSMUST00000159417.1	ENSMUSG00000026344	Lypd1	Ly6/Plaur domain containing 1 [Source:MGI Symbol;Acc:MGI:1919835]	6464	112.965367965367	120.564784053156	116.349019607843	123.138554216867	116.848958333333	231	301	255	166	192	0.64905133699703
ENSMUST00000162899.7	ENSMUSG00000026344	Lypd1	Ly6/Plaur domain containing 1 [Source:MGI Symbol;Acc:MGI:1919835]	1511	103.142857142857	97.5	102.75	92.2	116.5	7	6	12	10	10	0.732652546935469
ENSMUST00000171249.5	ENSMUSG00000028100	Nudt17	nudix (nucleoside diphosphate linked moiety X)-type motif 17 [Source:MGI Symbol;Acc:MGI:1925623]	1110	155.272727272727	114.333333333333	119.375	152.5	137.222222222222	11	6	8	6	9	0.941573085428837
ENSMUST00000004206.9	ENSMUSG00000070319	Eif3g	eukaryotic translation initiation factor 3, subunit G [Source:MGI Symbol;Acc:MGI:1858258]	1101	111.238805970149	119.554252199413	111.655976676384	109.955555555555	109.721556886227	268	341	343	225	334	0.219182236607138
ENSMUST00000067664.9	ENSMUSG00000020849	Ywhae	tyrosine 3-monooxygenase/tryptophan 5-monooxygenase activation protein, epsilon polypeptide [Source:MGI Symbol;Acc:MGI:894689]	2100	127.534729493891	130.334098360655	127.376879026485	124.208682008368	127.331417624521	2865	3050	2794	1912	2610	0.221629231616817
ENSMUST00000204653.2	ENSMUSG00000030057	Cnbp	cellular nucleic acid binding protein [Source:MGI Symbol;Acc:MGI:88431]	2175	148.021008403361	151.499040307101	139.926267281106	142.514666666666	149.158129175946	476	521	434	375	449	0.216729711192455
ENSMUST00000204890.2	ENSMUSG00000030057	Cnbp	cellular nucleic acid binding protein [Source:MGI Symbol;Acc:MGI:88431]	1614	139.38596491228	154.117647058823	155.405797101449	156.727272727272	137.725490196078	57	68	69	44	51	0.761385853370564
ENSMUST00000113619.7	ENSMUSG00000030057	Cnbp	cellular nucleic acid binding protein [Source:MGI Symbol;Acc:MGI:88431]	1661	143.997448979591	147.11622276029	148.646900269541	147.829596412556	148.997275204359	392	413	371	223	367	0.099699746739937
ENSMUST00000032138.14	ENSMUSG00000030057	Cnbp	cellular nucleic acid binding protein [Source:MGI Symbol;Acc:MGI:88431]	2178	151.578512396694	156.068273092369	151.916666666666	140.692307692307	154.330578512396	242	249	216	156	242	0.456253010749846
ENSMUST00000027339.13	ENSMUSG00000026155	Smap1	small ArfGAP 1 [Source:MGI Symbol;Acc:MGI:2138261]	2289	134.884236453201	136.815217391304	136.769736842105	131.4	141.620938628158	406	368	304	210	277	0.859528307369262
ENSMUST00000196700.4	ENSMUSG00000037400	Atp11b	ATPase, class VI, type 11B [Source:MGI Symbol;Acc:MGI:1923545]	6322	336.636363636363	334.214285714285	311.545454545454	315.071428571428	354.227272727272	33	28	22	14	22	0.664390780445344
ENSMUST00000029257.14	ENSMUSG00000037400	Atp11b	ATPase, class VI, type 11B [Source:MGI Symbol;Acc:MGI:1923545]	4868	239.756756756756	241.921052631578	221.179487179487	198.95	236.642857142857	37	38	39	20	28	0.219092488585997
ENSMUST00000198599.1	ENSMUSG00000037400	Atp11b	ATPase, class VI, type 11B [Source:MGI Symbol;Acc:MGI:1923545]	4102	247.15	250.047619047619	267.916666666666	198.4	236.333333333333	20	21	12	5	15	0.618264524793111
ENSMUST00000196409.1	ENSMUSG00000037400	Atp11b	ATPase, class VI, type 11B [Source:MGI Symbol;Acc:MGI:1923545]	1918	280.521739130434	306.545454545454	252.833333333333	258.416666666666	224.5	23	22	12	12	12	0.0626576264918426
ENSMUST00000108987.7	ENSMUSG00000018398	39692	septin 8 [Source:MGI Symbol;Acc:MGI:894310]	4436	150.093023255813	156.627450980392	145.536585365853	112.621621621621	169.980769230769	43	51	41	37	52	0.655769752296039
ENSMUST00000121334.7	ENSMUSG00000018398	39692	septin 8 [Source:MGI Symbol;Acc:MGI:894310]	2801	155.884726224783	156.868357487922	155.880794701986	151.883239171374	161.213498622589	694	828	755	531	726	0.989377445410316
ENSMUST00000117061.7	ENSMUSG00000018398	39692	septin 8 [Source:MGI Symbol;Acc:MGI:894310]	4563	199.318181818181	200.214285714285	190	186.125	148.947368421052	22	28	23	16	19	0.239345728525745
ENSMUST00000120878.8	ENSMUSG00000018398	39692	septin 8 [Source:MGI Symbol;Acc:MGI:894310]	1806	119.426229508196	127.35	137.5625	113.117647058823	131.962264150943	61	80	48	51	53	0.705193572711531
ENSMUST00000109424.3	ENSMUSG00000022382	Wnt7b	wingless-type MMTV integration site family, member 7B [Source:MGI Symbol;Acc:MGI:98962]	3134	106.975	126.676470588235	112.717948717948	114.916666666666	107.974358974358	40	34	39	24	39	0.570511265046277
ENSMUST00000023015.14	ENSMUSG00000022382	Wnt7b	wingless-type MMTV integration site family, member 7B [Source:MGI Symbol;Acc:MGI:98962]	3365	108.162162162162	112.535714285714	124.029411764705	104.84	98.2727272727272	37	28	34	25	22	0.905691390696022
ENSMUST00000229495.1	ENSMUSG00000022382	Wnt7b	wingless-type MMTV integration site family, member 7B [Source:MGI Symbol;Acc:MGI:98962]	3125	120.689655172413	118.235294117647	123.136363636363	91.4705882352941	128.666666666666	29	17	22	17	24	0.758898462465844
ENSMUST00000167968.8	ENSMUSG00000022382	Wnt7b	wingless-type MMTV integration site family, member 7B [Source:MGI Symbol;Acc:MGI:98962]	3400	120	160.375	154.6	145.666666666666	104	1	8	5	3	3	0.842743693111853
ENSMUST00000163643.2	ENSMUSG00000006276	Eps15l1	epidermal growth factor receptor pathway substrate 15-like 1 [Source:MGI Symbol;Acc:MGI:104582]	3129	160.415730337078	175.898550724637	143.416666666666	164.435897435897	180.323943661971	89	69	60	39	71	0.74056629824351
ENSMUST00000212121.1	ENSMUSG00000006276	Eps15l1	epidermal growth factor receptor pathway substrate 15-like 1 [Source:MGI Symbol;Acc:MGI:104582]	2686	224.181818181818	206.083333333333	172.75	198.5	149.285714285714	11	12	8	6	7	0.123112096234229
ENSMUST00000212590.1	ENSMUSG00000006276	Eps15l1	epidermal growth factor receptor pathway substrate 15-like 1 [Source:MGI Symbol;Acc:MGI:104582]	3376	233.2	80	224	191.5	133.666666666666	5	1	3	2	6	0.717391956752943
ENSMUST00000079041.6	ENSMUSG00000060181	Slc35e3	solute carrier family 35, member E3 [Source:MGI Symbol;Acc:MGI:2448489]	3489	159.74193548387	143.346666666666	142.967213114754	140.306122448979	145.882352941176	62	75	61	49	85	0.2797532061605
ENSMUST00000021135.4	ENSMUSG00000020783	Ncbp3	nuclear cap binding subunit 3 [Source:MGI Symbol;Acc:MGI:1914124]	12106	157.057142857142	160.888888888888	139.302325581395	143.333333333333	142.853658536585	35	27	43	30	41	0.00425843824808987
ENSMUST00000059986.2	ENSMUSG00000044164	Rnf182	ring finger protein 182 [Source:MGI Symbol;Acc:MGI:3045355]	3544	102.95	133.48	138.925925925925	110.923076923076	153.705882352941	20	25	27	13	17	0.470495651433222
ENSMUST00000163153.8	ENSMUSG00000032050	Rdx	radixin [Source:MGI Symbol;Acc:MGI:97887]	4131	145.168539325842	146.886363636363	142.151162790697	126.627450980392	135.910447761194	89	88	86	51	67	0.15357651305611
ENSMUST00000000590.15	ENSMUSG00000032050	Rdx	radixin [Source:MGI Symbol;Acc:MGI:97887]	4380	171	148.27027027027	153.375	152.631578947368	131.571428571428	26	37	32	19	28	0.351755997868221
ENSMUST00000161017.7	ENSMUSG00000026494	Kif26b	kinesin family member 26B [Source:MGI Symbol;Acc:MGI:2447076]	13749	141.75	176.928571428571	154.666666666666	143.75	166.2	8	14	6	4	5	0.792644107900508
ENSMUST00000035301.6	ENSMUSG00000039105	Atp6v1g1	ATPase, H+ transporting, lysosomal V1 subunit G1 [Source:MGI Symbol;Acc:MGI:1913540]	1135	117.107255520504	113.525179856115	115.422558922558	115.071910112359	114.5875	634	695	594	445	640	0.8466146140927
ENSMUST00000114318.9	ENSMUSG00000026959	Grin1	glutamate receptor, ionotropic, NMDA1 (zeta 1) [Source:MGI Symbol;Acc:MGI:95819]	3920	146.422535211267	146.166666666666	159.267605633802	164.1	138.784615384615	71	66	71	40	65	0.495213899625223
ENSMUST00000114310.9	ENSMUSG00000026959	Grin1	glutamate receptor, ionotropic, NMDA1 (zeta 1) [Source:MGI Symbol;Acc:MGI:95819]	4276	166.231292517006	157.280487804878	153.798742138364	159.791208791208	154.773255813953	147	164	159	91	172	0.263704299459747
ENSMUST00000114308.9	ENSMUSG00000026959	Grin1	glutamate receptor, ionotropic, NMDA1 (zeta 1) [Source:MGI Symbol;Acc:MGI:95819]	4165	170.941747572815	169.872180451127	165.113821138211	166.168539325842	180.116071428571	103	133	123	89	112	0.99304415030184
ENSMUST00000114317.9	ENSMUSG00000026959	Grin1	glutamate receptor, ionotropic, NMDA1 (zeta 1) [Source:MGI Symbol;Acc:MGI:95819]	3809	147.172413793103	148.231481481481	147.493670886075	138.662790697674	147.457627118644	87	108	79	86	118	0.467523004722386
ENSMUST00000028335.12	ENSMUSG00000026959	Grin1	glutamate receptor, ionotropic, NMDA1 (zeta 1) [Source:MGI Symbol;Acc:MGI:95819]	4238	168.046296296296	159.412244897959	153.490909090909	150.09493670886	163.5468164794	216	245	220	158	267	0.281861423098928
ENSMUST00000114314.9	ENSMUSG00000026959	Grin1	glutamate receptor, ionotropic, NMDA1 (zeta 1) [Source:MGI Symbol;Acc:MGI:95819]	3882	160.486486486486	151.090909090909	165.247191011235	150.939393939393	163.095744680851	74	77	89	66	94	0.596693287554117
ENSMUST00000114307.7	ENSMUSG00000026959	Grin1	glutamate receptor, ionotropic, NMDA1 (zeta 1) [Source:MGI Symbol;Acc:MGI:95819]	4127	178.60162601626	177.839743589743	162.264	164.466666666666	159.150943396226	123	156	125	75	106	0.00395216034871807
ENSMUST00000114312.1	ENSMUSG00000026959	Grin1	glutamate receptor, ionotropic, NMDA1 (zeta 1) [Source:MGI Symbol;Acc:MGI:95819]	3838	148.842105263157	151.495867768595	153.566433566433	144.356164383561	151.095652173913	95	121	143	73	115	0.901492071725084
ENSMUST00000044751.13	ENSMUSG00000039686	Zer1	zyg-11 related, cell cycle regulator [Source:MGI Symbol;Acc:MGI:2442511]	4100	167.027777777777	173.779816513761	153.35606060606	168.5	151.112244897959	144	109	132	76	98	0.187106136239633
ENSMUST00000113677.2	ENSMUSG00000039686	Zer1	zyg-11 related, cell cycle regulator [Source:MGI Symbol;Acc:MGI:2442511]	4189	158.770833333333	164.090517241379	160.995412844036	151.790322580645	167.350210970464	240	232	218	186	237	0.836481472239294
ENSMUST00000200585.4	ENSMUSG00000037225	Fgf2	fibroblast growth factor 2 [Source:MGI Symbol;Acc:MGI:95516]	5973	216.75	163.1	148.333333333333	85	215.4	4	10	9	3	5	0.498554377779733
ENSMUST00000040880.8	ENSMUSG00000041205	Map6d1	MAP6 domain containing 1 [Source:MGI Symbol;Acc:MGI:3607784]	3280	173.678787878787	172.510752688172	169.005434782608	171.032520325203	173.938775510204	165	186	184	123	147	0.420204876941638
ENSMUST00000105256.9	ENSMUSG00000078429	Ctdsp2	CTD (carboxy-terminal domain, RNA polymerase II, polypeptide A) small phosphatase 2 [Source:MGI Symbol;Acc:MGI:1098748]	4817	161.463768115942	163.973913043478	155.586466165413	158.781512605042	166.682926829268	138	115	133	119	123	0.624663270179565
ENSMUST00000105255.2	ENSMUSG00000078429	Ctdsp2	CTD (carboxy-terminal domain, RNA polymerase II, polypeptide A) small phosphatase 2 [Source:MGI Symbol;Acc:MGI:1098748]	4136	186.625	181.057971014492	191.0625	153.837837837837	166.174603174603	80	69	64	37	63	0.414860452478927
ENSMUST00000042227.14	ENSMUSG00000041623	D11Wsu47e	DNA segment, Chr 11, Wayne State University 47, expressed [Source:MGI Symbol;Acc:MGI:106356]	2196	154	150.666666666666	120.5	99.5	104.6	5	6	8	2	10	0.0128109918353466
ENSMUST00000106621.3	ENSMUSG00000041623	D11Wsu47e	DNA segment, Chr 11, Wayne State University 47, expressed [Source:MGI Symbol;Acc:MGI:106356]	2062	146.111111111111	117.666666666666	134.545454545454	118.25	116.666666666666	9	12	11	4	9	0.547295470130773
ENSMUST00000114143.9	ENSMUSG00000031399	Fam3a	family with sequence similarity 3, member A [Source:MGI Symbol;Acc:MGI:1913544]	1899	147.538461538461	169.631578947368	166.72	155.071428571428	164.781818181818	52	57	50	42	55	0.728375171195498
ENSMUST00000230066.1	ENSMUSG00000022476	Polr3h	polymerase (RNA) III (DNA directed) polypeptide H [Source:MGI Symbol;Acc:MGI:1926179]	438	110.4	109.25	109.130434782608	108.538461538461	101.142857142857	15	16	23	13	7	0.365897903822253
ENSMUST00000023113.6	ENSMUSG00000022476	Polr3h	polymerase (RNA) III (DNA directed) polypeptide H [Source:MGI Symbol;Acc:MGI:1926179]	2542	127.450704225352	130.485029940119	132.561643835616	132.710280373831	130.215189873417	142	167	146	107	158	0.159879283687572
ENSMUST00000185675.6	ENSMUSG00000032252	Glce	glucuronyl C5-epimerase [Source:MGI Symbol;Acc:MGI:2136405]	4850	130.086956521739	166.196428571428	148.4	144.5625	157.807692307692	46	56	30	32	52	0.892425201968543
ENSMUST00000034785.7	ENSMUSG00000032252	Glce	glucuronyl C5-epimerase [Source:MGI Symbol;Acc:MGI:2136405]	4626	127.260869565217	139.086956521739	145.15625	125.8125	154.966666666666	23	23	32	16	30	0.513113143381459
ENSMUST00000003687.7	ENSMUSG00000021253	Tgfb3	transforming growth factor, beta 3 [Source:MGI Symbol;Acc:MGI:98727]	3383	139.096774193548	152.4	133.85	144.6	133.090909090909	31	35	20	25	33	0.302514026089395
ENSMUST00000062528.8	ENSMUSG00000050840	Cdh20	cadherin 20 [Source:MGI Symbol;Acc:MGI:1346069]	4012	155.170731707317	143.617021276595	163.379310344827	127.416666666666	152.35294117647	41	47	29	12	34	0.914570717804305
ENSMUST00000057975.7	ENSMUSG00000051444	Bbs12	Bardet-Biedl syndrome 12 (human) [Source:MGI Symbol;Acc:MGI:2686651]	2433	115.5	210	122.5	160.333333333333	165.5	6	6	4	3	4	0.757400920416897
ENSMUST00000037260.7	ENSMUSG00000050846	Zfp623	zinc finger protein 623 [Source:MGI Symbol;Acc:MGI:1926084]	2486	159.612903225806	120.567567567567	140.53125	119.15	146.714285714285	31	37	32	20	14	0.814929739356137
ENSMUST00000071103.9	ENSMUSG00000037149	Ddx1	DEAD (Asp-Glu-Ala-Asp) box polypeptide 1 [Source:MGI Symbol;Acc:MGI:2144727]	4842	129.411764705882	132.423423423423	128.021604938271	120.803738317757	129.779552715654	323	333	324	214	313	0.294220960290143
ENSMUST00000052645.12	ENSMUSG00000050174	Nudt6	nudix (nucleoside diphosphate linked moiety X)-type motif 6 [Source:MGI Symbol;Acc:MGI:2387618]	1155	237.4	97.5	181.666666666666	187.25	134	5	8	6	4	4	0.99754315982134
ENSMUST00000146324.7	ENSMUSG00000050174	Nudt6	nudix (nucleoside diphosphate linked moiety X)-type motif 6 [Source:MGI Symbol;Acc:MGI:2387618]	1264	203.875	190.625	170.25	137	147.428571428571	8	8	4	1	7	0.0437713144400027
ENSMUST00000021307.9	ENSMUSG00000020930	Ccdc103	coiled-coil domain containing 103 [Source:MGI Symbol;Acc:MGI:1920543]	1841	131.357142857142	110.8	84.3846153846153	124.142857142857	97.75	14	10	13	7	8	0.34338875175778
ENSMUST00000112705.8	ENSMUSG00000026946	Nmi	N-myc (and STAT) interactor [Source:MGI Symbol;Acc:MGI:1928368]	1130	126.5	118.666666666666	130.111111111111	148.75	182	6	3	9	4	3	0.215127173034712
ENSMUST00000108287.9	ENSMUSG00000050132	Sarm1	sterile alpha and HEAT/Armadillo motif containing 1 [Source:MGI Symbol;Acc:MGI:2136419]	4868	146.25	207.166666666666	137.928571428571	120.25	130.142857142857	4	12	14	4	7	0.13943344123808
ENSMUST00000153534.1	ENSMUSG00000050132	Sarm1	sterile alpha and HEAT/Armadillo motif containing 1 [Source:MGI Symbol;Acc:MGI:2136419]	2497	217.166666666666	144.166666666666	147.75	172	157.625	6	6	4	3	8	0.507189037472025
ENSMUST00000061174.6	ENSMUSG00000050132	Sarm1	sterile alpha and HEAT/Armadillo motif containing 1 [Source:MGI Symbol;Acc:MGI:2136419]	4083	153.588235294117	145.75	145.533333333333	136.222222222222	184.75	17	28	15	18	20	0.783489119620701
ENSMUST00000023116.6	ENSMUSG00000022477	Aco2	aconitase 2, mitochondrial [Source:MGI Symbol;Acc:MGI:87880]	2918	120.415470494417	126.315638450502	119.691506410256	119.276073619631	124.956006768189	1254	1394	1248	815	1182	0.568877023799603
ENSMUST00000157003.7	ENSMUSG00000022477	Aco2	aconitase 2, mitochondrial [Source:MGI Symbol;Acc:MGI:87880]	351	87	91	74.6666666666666	64.6666666666666	98.5	4	4	6	3	4	0.510057628322324
ENSMUST00000025350.9	ENSMUSG00000024472	Dcp2	decapping mRNA 2 [Source:MGI Symbol;Acc:MGI:1917890]	8616	165.458333333333	150.202702702702	148.478260869565	167.46875	161.25352112676	72	74	69	64	71	0.901472816211964
ENSMUST00000037607.10	ENSMUSG00000028284	Map3k7	mitogen-activated protein kinase kinase kinase 7 [Source:MGI Symbol;Acc:MGI:1346877]	5773	179.444444444444	184.125	197.428571428571	143.777777777777	208.8	18	24	14	9	10	0.956093298412089
ENSMUST00000080933.12	ENSMUSG00000028284	Map3k7	mitogen-activated protein kinase kinase kinase 7 [Source:MGI Symbol;Acc:MGI:1346877]	5669	190.243902439024	179.228571428571	148.818181818181	151	175.484848484848	41	35	33	19	33	0.111608410709251
ENSMUST00000108183.7	ENSMUSG00000028284	Map3k7	mitogen-activated protein kinase kinase kinase 7 [Source:MGI Symbol;Acc:MGI:1346877]	5416	190.7	201.875	164.444444444444	80.6666666666666	145.571428571428	10	8	9	3	7	0.139237342066594
ENSMUST00000108184.2	ENSMUSG00000028284	Map3k7	mitogen-activated protein kinase kinase kinase 7 [Source:MGI Symbol;Acc:MGI:1346877]	5491	126.5	187.333333333333	123.444444444444	120.888888888888	227.2	10	6	9	9	5	0.996204803539593
ENSMUST00000230812.1	ENSMUSG00000036678	Aaas	achalasia, adrenocortical insufficiency, alacrimia [Source:MGI Symbol;Acc:MGI:2443767]	2230	133.928571428571	120	116.666666666666	110.5	139.4	14	1	3	4	5	0.72740419349454
ENSMUST00000041208.8	ENSMUSG00000036678	Aaas	achalasia, adrenocortical insufficiency, alacrimia [Source:MGI Symbol;Acc:MGI:2443767]	1811	160.827586206896	146.833333333333	164.51724137931	144.347826086956	163.608695652173	29	30	29	23	23	0.737722920334914
ENSMUST00000048966.6	ENSMUSG00000041852	Tcf20	transcription factor 20 [Source:MGI Symbol;Acc:MGI:108399]	7417	145.742424242424	150.493670886075	149.371794871794	140.714285714285	129.51724137931	66	79	78	56	58	0.358619121900716
ENSMUST00000109510.9	ENSMUSG00000041852	Tcf20	transcription factor 20 [Source:MGI Symbol;Acc:MGI:108399]	7323	146.523809523809	122.08	117.470588235294	137.384615384615	129.473684210526	21	25	17	13	19	0.635587437968497
ENSMUST00000029515.4	ENSMUSG00000027907	S100a11	S100 calcium binding protein A11 [Source:MGI Symbol;Acc:MGI:1338798]	511	108.65625	106.225806451612	111.595238095238	116.793103448275	137.433333333333	32	62	42	29	30	0.251262442261422
ENSMUST00000067444.9	ENSMUSG00000020932	Gfap	glial fibrillary acidic protein [Source:MGI Symbol;Acc:MGI:95697]	2648	124.762057877813	130.501577287066	124.670967741935	130.013513513513	136.885057471264	311	317	310	222	261	0.606380682097499
ENSMUST00000077902.4	ENSMUSG00000020932	Gfap	glial fibrillary acidic protein [Source:MGI Symbol;Acc:MGI:95697]	2600	111.8	138.32	114.115384615384	101.526315789473	123.95652173913	15	25	26	19	23	0.427521964774395
ENSMUST00000019962.14	ENSMUSG00000019818	Cd164	CD164 antigen [Source:MGI Symbol;Acc:MGI:1859568]	2922	150.621495327102	152.739795918367	161.41450777202	149.947368421052	147.412935323383	214	196	193	133	201	0.838895258154684
ENSMUST00000057324.3	ENSMUSG00000047414	Flrt2	fibronectin leucine rich transmembrane protein 2 [Source:MGI Symbol;Acc:MGI:3603594]	7099	137.342281879194	154.518248175182	157.148148148148	137	144.216	149	137	108	86	125	0.98587183464468
ENSMUST00000085519.12	ENSMUSG00000032249	Anp32a	acidic (leucine-rich) nuclear phosphoprotein 32 family, member A [Source:MGI Symbol;Acc:MGI:108447]	2113	127.860169491525	127.75	128.217391304347	115.591715976331	127.940639269406	236	268	230	169	219	0.521701016689077
ENSMUST00000128636.7	ENSMUSG00000032249	Anp32a	acidic (leucine-rich) nuclear phosphoprotein 32 family, member A [Source:MGI Symbol;Acc:MGI:108447]	640	129.333333333333	97.6666666666666	125.857142857142	89.5714285714285	92.2777777777777	12	12	7	7	18	0.607867271873402
ENSMUST00000223467.1	ENSMUSG00000021392	Nol8	nucleolar protein 8 [Source:MGI Symbol;Acc:MGI:1918180]	4765	139	238.166666666666	102	135.25	127.666666666666	6	6	5	4	3	0.185994142180542
ENSMUST00000221142.1	ENSMUSG00000021392	Nol8	nucleolar protein 8 [Source:MGI Symbol;Acc:MGI:1918180]	4381	179.8	155.285714285714	163.791666666666	147.714285714285	187.294117647058	20	28	24	14	17	0.946223578363105
ENSMUST00000021824.7	ENSMUSG00000021392	Nol8	nucleolar protein 8 [Source:MGI Symbol;Acc:MGI:1918180]	4242	157.428571428571	186.75	109.833333333333	186.714285714285	150.333333333333	7	12	6	7	9	0.505667356439169
ENSMUST00000234941.1	ENSMUSG00000024142	Mlst8	MTOR associated protein, LST8 homolog (S. cerevisiae) [Source:MGI Symbol;Acc:MGI:1929514]	3223	147.294117647058	169.923076923076	155	158.3125	173.176470588235	17	26	13	16	17	0.769789522896944
ENSMUST00000179163.2	ENSMUSG00000024142	Mlst8	MTOR associated protein, LST8 homolog (S. cerevisiae) [Source:MGI Symbol;Acc:MGI:1929514]	3340	163.21875	157.205882352941	173.307692307692	196.90909090909	147.115384615384	32	34	26	22	26	0.559716656460577
ENSMUST00000070888.13	ENSMUSG00000024142	Mlst8	MTOR associated protein, LST8 homolog (S. cerevisiae) [Source:MGI Symbol;Acc:MGI:1929514]	3358	208.785714285714	165.333333333333	156.272727272727	178.125	159.058823529411	14	21	11	8	17	0.308718739019171
ENSMUST00000234686.1	ENSMUSG00000024142	Mlst8	MTOR associated protein, LST8 homolog (S. cerevisiae) [Source:MGI Symbol;Acc:MGI:1929514]	3855	207.666666666666	230.5	159.833333333333	NA	148.666666666666	3	4	6	0	6	0.03634313654932
ENSMUST00000136628.1	ENSMUSG00000074754	Smim26	small integral membrane protein 26 [Source:MGI Symbol;Acc:MGI:2685407]	471	111.949438202247	117.76	127.55294117647	120.60465116279	126.452631578947	178	200	170	129	190	0.0656572525330729
ENSMUST00000054308.12	ENSMUSG00000035293	G2e3	G2/M-phase specific E3 ubiquitin ligase [Source:MGI Symbol;Acc:MGI:2444298]	6803	202.5	218.791666666666	195.111111111111	188.2	215.91304347826	26	24	18	10	23	0.442207128038614
ENSMUST00000038876.12	ENSMUSG00000040212	Emp3	epithelial membrane protein 3 [Source:MGI Symbol;Acc:MGI:1098729]	736	103.727272727272	112.882352941176	101.785714285714	87.7272727272727	114.333333333333	22	17	14	11	12	0.551154559437824
ENSMUST00000040971.13	ENSMUSG00000035547	Capn5	calpain 5 [Source:MGI Symbol;Acc:MGI:1100859]	4498	153.65	169.597938144329	151.225490196078	135.36	136.671875	100	97	102	50	64	0.10313003230067
ENSMUST00000029297.5	ENSMUSG00000027737	Slc7a11	solute carrier family 7 (cationic amino acid transporter, y+ system), member 11 [Source:MGI Symbol;Acc:MGI:1347355]	9223	157.777777777777	165.910447761194	146.318181818181	148.657894736842	151.311475409836	72	67	44	38	61	0.0348176535292927
ENSMUST00000058300.13	ENSMUSG00000030281	Il17rc	interleukin 17 receptor C [Source:MGI Symbol;Acc:MGI:2159336]	2302	123.818181818181	106.894736842105	103.416666666666	103.272727272727	143.2	11	19	12	11	5	0.948832688387133
ENSMUST00000205208.2	ENSMUSG00000030281	Il17rc	interleukin 17 receptor C [Source:MGI Symbol;Acc:MGI:2159336]	1759	91.1111111111111	113.785714285714	89.8	107	137.333333333333	9	14	5	2	6	0.683037855505499
ENSMUST00000039987.3	ENSMUSG00000041272	Tox	thymocyte selection-associated high mobility group box [Source:MGI Symbol;Acc:MGI:2181659]	3961	150	171.418918918918	152.08064516129	141.027777777777	140.107142857142	66	74	62	36	56	0.181282070498495
ENSMUST00000110817.2	ENSMUSG00000027315	Spint1	serine protease inhibitor, Kunitz type 1 [Source:MGI Symbol;Acc:MGI:1338033]	2323	101.888888888888	138.666666666666	146.333333333333	108.571428571428	101.571428571428	9	9	3	7	7	0.952764786720648
ENSMUST00000118111.7	ENSMUSG00000031302	Nlgn3	neuroligin 3 [Source:MGI Symbol;Acc:MGI:2444609]	8004	155.904761904761	155.86	152.885245901639	142.586956521739	147.15	42	50	61	46	60	0.118593344833223
ENSMUST00000151528.7	ENSMUSG00000031302	Nlgn3	neuroligin 3 [Source:MGI Symbol;Acc:MGI:2444609]	8541	159.83606557377	148.291666666666	155.469387755102	140.696969696969	158.152542372881	61	48	49	33	59	0.770519595042689
ENSMUST00000065858.2	ENSMUSG00000031302	Nlgn3	neuroligin 3 [Source:MGI Symbol;Acc:MGI:2444609]	8465	143.038461538461	148.511627906976	152.544117647058	141.4	150.628571428571	78	86	68	55	70	0.655013819685091
ENSMUST00000102743.9	ENSMUSG00000037533	Rapgef6	Rap guanine nucleotide exchange factor (GEF) 6 [Source:MGI Symbol;Acc:MGI:2384761]	8189	223.1	209.291666666666	177.142857142857	206.666666666666	188.130434782608	30	24	21	12	23	0.128411479062582
ENSMUST00000239168.1	ENSMUSG00000037533	Rapgef6	Rap guanine nucleotide exchange factor (GEF) 6 [Source:MGI Symbol;Acc:MGI:2384761]	7131	193.666666666666	171.705882352941	162.65	245	190.611111111111	21	17	20	5	18	0.639862088778282
ENSMUST00000101445.10	ENSMUSG00000045466	Zfp956	zinc finger protein 956 [Source:MGI Symbol;Acc:MGI:2141515]	2761	134.833333333333	171.111111111111	144.823529411764	135.555555555555	173.5	36	36	34	18	24	0.938392423233325
ENSMUST00000020717.11	ENSMUSG00000020440	Arf5	ADP-ribosylation factor 5 [Source:MGI Symbol;Acc:MGI:99434]	1116	142.123711340206	145.54781420765	139.763271162123	137.63768115942	143.069518716577	582	732	697	483	748	0.223782325714135
ENSMUST00000043680.8	ENSMUSG00000035198	Tubg1	tubulin, gamma 1 [Source:MGI Symbol;Acc:MGI:101834]	1802	130.075187969924	124.985611510791	125.728070175438	125.573913043478	133.008264462809	133	139	114	115	121	0.886490432221418
ENSMUST00000053306.7	ENSMUSG00000049112	Oxtr	oxytocin receptor [Source:MGI Symbol;Acc:MGI:109147]	4704	150.714285714285	158	127.190476190476	114.8	160.733333333333	14	16	21	10	15	0.343367655282629
ENSMUST00000204027.1	ENSMUSG00000049112	Oxtr	oxytocin receptor [Source:MGI Symbol;Acc:MGI:109147]	3721	147.571428571428	111.166666666666	138.25	157.25	130	7	6	4	4	5	0.51890386762548
ENSMUST00000045756.13	ENSMUSG00000041959	S100a10	S100 calcium binding protein A10 (calpactin) [Source:MGI Symbol;Acc:MGI:1339468]	685	116.033980582524	110.170454545454	101.685714285714	114.746031746031	115.711920529801	206	352	280	189	302	0.727270510277546
ENSMUST00000090511.3	ENSMUSG00000029708	Gcc1	golgi coiled coil 1 [Source:MGI Symbol;Acc:MGI:1921625]	4650	129.829268292682	142.591836734693	147.941176470588	149.964285714285	144.131578947368	41	49	51	28	38	0.123763971470317
ENSMUST00000045288.13	ENSMUSG00000039239	Tgfb2	transforming growth factor, beta 2 [Source:MGI Symbol;Acc:MGI:98726]	5116	156.478260869565	143.428571428571	145.764705882352	143.944444444444	143.714285714285	23	21	17	18	14	0.347878014665972
ENSMUST00000048043.11	ENSMUSG00000041729	Coro2b	coronin, actin binding protein, 2B [Source:MGI Symbol;Acc:MGI:2444283]	3610	148.296842105263	151.202247191011	154.521634615384	153.517123287671	149.306329113924	475	445	416	292	395	0.330472015157463
ENSMUST00000090858.9	ENSMUSG00000042133	Ppig	peptidyl-prolyl isomerase G (cyclophilin G) [Source:MGI Symbol;Acc:MGI:2445173]	6127	172.568181818181	183.553191489361	166.404255319148	161.771428571428	158.767441860465	44	47	47	35	43	0.0512515297754107
ENSMUST00000040915.14	ENSMUSG00000042133	Ppig	peptidyl-prolyl isomerase G (cyclophilin G) [Source:MGI Symbol;Acc:MGI:2445173]	6245	167.625	189.333333333333	188.976744186046	160.571428571428	183.953488372093	40	39	43	28	43	0.965882587323731
ENSMUST00000135924.1	ENSMUSG00000028277	Ube2j1	ubiquitin-conjugating enzyme E2J 1 [Source:MGI Symbol;Acc:MGI:1926245]	3190	138.64423076923	145.134615384615	130.59375	147.177215189873	138.699029126213	104	104	128	79	103	0.675554999885814
ENSMUST00000124992.7	ENSMUSG00000028277	Ube2j1	ubiquitin-conjugating enzyme E2J 1 [Source:MGI Symbol;Acc:MGI:1926245]	3530	136.434554973822	134	142.645161290322	130.508928571428	131.721088435374	191	189	155	112	147	0.962443179982218
ENSMUST00000177768.2	ENSMUSG00000095595	Fam177a	family with sequence similarity 177, member A [Source:MGI Symbol;Acc:MGI:1920635]	3922	123.10902255639	132.345381526104	123.808988764044	131.933333333333	132.582887700534	266	249	178	105	187	0.754881659361816
ENSMUST00000027975.7	ENSMUSG00000026664	Phyh	phytanoyl-CoA hydroxylase [Source:MGI Symbol;Acc:MGI:891978]	1438	138.610027855153	138.0775	132.200680272108	134.325	129.823529411764	359	400	294	200	272	0.0346498279286123
ENSMUST00000028259.11	ENSMUSG00000026896	Ifih1	interferon induced with helicase C domain 1 [Source:MGI Symbol;Acc:MGI:1918836]	5470	148.357142857142	148.2	113.857142857142	138.5	166.833333333333	14	10	7	2	6	0.694497118086322
ENSMUST00000054048.9	ENSMUSG00000048965	Mrgpre	MAS-related GPR, member E [Source:MGI Symbol;Acc:MGI:2441884]	3761	149.666666666666	140.578947368421	147.052631578947	142.866666666666	142.444444444444	27	19	19	15	18	0.813126644099501
ENSMUST00000058688.6	ENSMUSG00000047496	Rnf152	ring finger protein 152 [Source:MGI Symbol;Acc:MGI:2443787]	8492	172.928571428571	132.166666666666	115.846153846153	163.153846153846	191.818181818181	14	18	13	13	11	0.900702607017969
ENSMUST00000172299.1	ENSMUSG00000047496	Rnf152	ring finger protein 152 [Source:MGI Symbol;Acc:MGI:2443787]	8406	163	112.818181818181	129.166666666666	164.8	136.666666666666	8	11	12	5	15	0.824937173113244
ENSMUST00000019044.7	ENSMUSG00000018900	Slc22a5	solute carrier family 22 (organic cation transporter), member 5 [Source:MGI Symbol;Acc:MGI:1329012]	3062	193.222222222222	181.941176470588	155.12	146.705882352941	142.714285714285	27	17	25	17	21	0.00832641268396185
ENSMUST00000091358.10	ENSMUSG00000028560	Usp1	ubiquitin specific peptidase 1 [Source:MGI Symbol;Acc:MGI:2385198]	3527	153.523809523809	140.108108108108	134.575757575757	130.172413793103	140.6	21	37	33	29	35	0.162256856806906
ENSMUST00000030289.8	ENSMUSG00000028560	Usp1	ubiquitin specific peptidase 1 [Source:MGI Symbol;Acc:MGI:2385198]	3577	135.333333333333	137.657142857142	160.055555555555	141	144.0625	33	35	36	21	32	0.219527825001981
ENSMUST00000110341.8	ENSMUSG00000027381	Bcl2l11	BCL2-like 11 (apoptosis facilitator) [Source:MGI Symbol;Acc:MGI:1197519]	5036	154.25	176.75	175.555555555555	155.5	143.6	4	8	9	2	5	0.653743083498758
ENSMUST00000234107.1	ENSMUSG00000024317	Rnf138	ring finger protein 138 [Source:MGI Symbol;Acc:MGI:1929211]	2422	142.428571428571	189.75	123.625	156.8	202.142857142857	7	4	8	5	7	0.888306273480254
ENSMUST00000234536.1	ENSMUSG00000024317	Rnf138	ring finger protein 138 [Source:MGI Symbol;Acc:MGI:1929211]	2271	164.833333333333	148.538461538461	190	109.5	188.571428571428	6	13	11	4	7	0.874246950694118
ENSMUST00000052396.6	ENSMUSG00000024317	Rnf138	ring finger protein 138 [Source:MGI Symbol;Acc:MGI:1929211]	2769	183.615384615384	194.625	158.1	143.25	137.461538461538	13	8	10	8	13	0.0172386632385335
ENSMUST00000072847.11	ENSMUSG00000024317	Rnf138	ring finger protein 138 [Source:MGI Symbol;Acc:MGI:1929211]	3002	133.866666666666	158.423076923076	138.027777777777	137.086956521739	136.521739130434	30	26	36	23	23	0.401804285133423
ENSMUST00000107415.7	ENSMUSG00000028358	Zfp618	zinc finger protein 618 [Source:MGI Symbol;Acc:MGI:1919950]	8826	208.4	162.222222222222	178.5	122.875	149.666666666666	10	9	10	8	3	0.285207646921479
ENSMUST00000057792.8	ENSMUSG00000032667	Pon2	paraoxonase 2 [Source:MGI Symbol;Acc:MGI:106687]	2409	135.974747474747	128.457142857142	127.954954954954	120.520833333333	125.57	198	210	222	144	200	0.15482171876777
ENSMUST00000084696.5	ENSMUSG00000038156	Spon1	spondin 1, (f-spondin) extracellular matrix protein [Source:MGI Symbol;Acc:MGI:2385287]	5201	105.666666666666	204	132.125	110.5	77.3333333333333	3	3	8	4	3	0.334753505769285
ENSMUST00000046687.15	ENSMUSG00000038156	Spon1	spondin 1, (f-spondin) extracellular matrix protein [Source:MGI Symbol;Acc:MGI:2385287]	6161	154.796407185628	153.624060150375	144.959677419354	156.623655913978	152.567307692307	167	133	124	93	104	0.56921281970171
ENSMUST00000186485.6	ENSMUSG00000056536	Pign	phosphatidylinositol glycan anchor biosynthesis, class N [Source:MGI Symbol;Acc:MGI:1351629]	6759	162.666666666666	203.444444444444	177.666666666666	130.571428571428	168.2	12	9	6	7	5	0.386737090452687
ENSMUST00000070699.14	ENSMUSG00000056536	Pign	phosphatidylinositol glycan anchor biosynthesis, class N [Source:MGI Symbol;Acc:MGI:1351629]	6528	162.272727272727	191.6	207.285714285714	150.285714285714	144.222222222222	11	10	7	7	9	0.753759162227602
ENSMUST00000026120.7	ENSMUSG00000025128	Bhlhe22	basic helix-loop-helix family, member e22 [Source:MGI Symbol;Acc:MGI:1930001]	3344	143.035502958579	135.995192307692	135.161849710982	134.716981132075	139.175438596491	169	208	173	106	171	0.395580958689451
ENSMUST00000049032.12	ENSMUSG00000038705	Gmeb2	glucocorticoid modulatory element binding protein 2 [Source:MGI Symbol;Acc:MGI:2652836]	4121	151.279069767441	171.729166666666	152.714285714285	161.033333333333	147.25	43	48	56	30	48	0.457331625817685
ENSMUST00000133103.1	ENSMUSG00000032673	Prorsd1	prolyl-tRNA synthetase domain containing 1 [Source:MGI Symbol;Acc:MGI:1915189]	2126	171.625	139.222222222222	148.285714285714	83.5	127.5	8	9	7	6	6	0.284778555746858
ENSMUST00000039900.3	ENSMUSG00000032673	Prorsd1	prolyl-tRNA synthetase domain containing 1 [Source:MGI Symbol;Acc:MGI:1915189]	918	119.473684210526	156.470588235294	166.4	113.25	130.363636363636	19	17	10	4	11	0.960951627314503
ENSMUST00000038099.5	ENSMUSG00000038037	Socs1	suppressor of cytokine signaling 1 [Source:MGI Symbol;Acc:MGI:1354910]	2785	89.6666666666666	145	155.8	103.5	140.571428571428	3	1	5	4	7	0.617709939263866
ENSMUST00000032180.6	ENSMUSG00000030093	Wnt7a	wingless-type MMTV integration site family, member 7A [Source:MGI Symbol;Acc:MGI:98961]	3172	132.12	136.115384615384	121.387096774193	117.125	126.870967741935	25	26	31	24	31	0.0519722105913405
ENSMUST00000000314.12	ENSMUSG00000000305	Cdh4	cadherin 4 [Source:MGI Symbol;Acc:MGI:99218]	6388	150.891304347826	158.791666666666	163.56	151.652173913043	148.888888888888	46	48	50	23	36	0.984075505687167
ENSMUST00000069511.7	ENSMUSG00000055782	Abcd2	ATP-binding cassette, sub-family D (ALD), member 2 [Source:MGI Symbol;Acc:MGI:1349467]	5532	144.035714285714	137.285714285714	148.046511627906	147.641791044776	139.495145631067	112	98	86	67	103	0.389883928195892
ENSMUST00000077709.10	ENSMUSG00000045917	Tmem268	transmembrane protein 268 [Source:MGI Symbol;Acc:MGI:1913920]	3765	139.375	159.703703703703	159.230769230769	157.761904761904	195.4	8	27	13	21	15	0.313726401424266
ENSMUST00000080336.3	ENSMUSG00000045917	Tmem268	transmembrane protein 268 [Source:MGI Symbol;Acc:MGI:1913920]	3630	163.5625	151.111111111111	142.5625	176.75	161	16	9	16	4	14	0.851477973647173
ENSMUST00000155123.7	ENSMUSG00000038611	Phrf1	PHD and ring finger domains 1 [Source:MGI Symbol;Acc:MGI:2141847]	5271	146.666666666666	139.788461538461	140	124.483870967741	159.428571428571	33	52	22	31	28	0.894179089574956
ENSMUST00000106027.8	ENSMUSG00000038611	Phrf1	PHD and ring finger domains 1 [Source:MGI Symbol;Acc:MGI:2141847]	5248	121	174.428571428571	186.5	139.555555555555	171.2	2	7	2	9	10	0.548262077654043
ENSMUST00000142572.7	ENSMUSG00000038611	Phrf1	PHD and ring finger domains 1 [Source:MGI Symbol;Acc:MGI:2141847]	2519	158.133333333333	143.375	98.6666666666666	126.666666666666	137.111111111111	15	16	12	9	9	0.154495686311399
ENSMUST00000130687.1	ENSMUSG00000038611	Phrf1	PHD and ring finger domains 1 [Source:MGI Symbol;Acc:MGI:2141847]	1189	121.857142857142	143.5	127.142857142857	130	67.3333333333333	7	6	7	1	3	0.439469759763416
ENSMUST00000117095.7	ENSMUSG00000003363	Pld3	phospholipase D family, member 3 [Source:MGI Symbol;Acc:MGI:1333782]	2282	131.697616060225	133.206611570247	129.637413394919	124.359168241965	134.285	797	847	866	529	800	0.478260032155483
ENSMUST00000117611.7	ENSMUSG00000003363	Pld3	phospholipase D family, member 3 [Source:MGI Symbol;Acc:MGI:1333782]	2297	132.474666666666	135.533665835411	128.709563164108	124.441947565543	128.260217983651	750	802	847	534	734	0.0460540497689588
ENSMUST00000202143.3	ENSMUSG00000038784	Cnot4	CCR4-NOT transcription complex, subunit 4 [Source:MGI Symbol;Acc:MGI:1859026]	3202	163.8	145	173.6	186.5	154	5	3	5	4	7	0.314198658126982
ENSMUST00000114993.8	ENSMUSG00000038784	Cnot4	CCR4-NOT transcription complex, subunit 4 [Source:MGI Symbol;Acc:MGI:1859026]	3473	162.882352941176	171.142857142857	148.857142857142	128.166666666666	139.125	17	14	21	6	8	0.0422632532797033
ENSMUST00000044163.9	ENSMUSG00000038784	Cnot4	CCR4-NOT transcription complex, subunit 4 [Source:MGI Symbol;Acc:MGI:1859026]	3337	173	158.444444444444	119.111111111111	164.7	160	9	9	9	10	6	0.428154768704099
ENSMUST00000202417.1	ENSMUSG00000038784	Cnot4	CCR4-NOT transcription complex, subunit 4 [Source:MGI Symbol;Acc:MGI:1859026]	3296	152	147.2	151.2	139.4	143.571428571428	8	15	15	15	7	0.384958665394878
ENSMUST00000200954.1	ENSMUSG00000038784	Cnot4	CCR4-NOT transcription complex, subunit 4 [Source:MGI Symbol;Acc:MGI:1859026]	2800	207.4	189.833333333333	176.333333333333	164.333333333333	125	5	6	6	3	7	0.131405243813795
ENSMUST00000105616.9	ENSMUSG00000029064	Gnb1	guanine nucleotide binding protein (G protein), beta 1 [Source:MGI Symbol;Acc:MGI:95781]	3088	159.457725947521	153.676217765043	154.71676300578	155.347368421052	158.197674418604	343	349	346	285	344	0.863315211316518
ENSMUST00000030940.13	ENSMUSG00000029064	Gnb1	guanine nucleotide binding protein (G protein), beta 1 [Source:MGI Symbol;Acc:MGI:95781]	3131	158.633177570093	155.900677200902	155.890380313199	160.97	158.348717948717	428	443	447	300	390	0.633783482614303
ENSMUST00000176637.1	ENSMUSG00000029064	Gnb1	guanine nucleotide binding protein (G protein), beta 1 [Source:MGI Symbol;Acc:MGI:95781]	2832	166.173333333333	160.643356643356	168.051612903225	167.821052631578	163.566176470588	150	143	155	95	136	0.351572455122033
ENSMUST00000165335.7	ENSMUSG00000029064	Gnb1	guanine nucleotide binding protein (G protein), beta 1 [Source:MGI Symbol;Acc:MGI:95781]	3143	157.865573770491	159.102040816326	159.909803921568	157.134020618556	154.325174825174	305	294	255	194	286	0.568624426361332
ENSMUST00000047903.9	ENSMUSG00000034807	Colgalt1	collagen beta(1-O)galactosyltransferase 1 [Source:MGI Symbol;Acc:MGI:1924348]	3207	182.871794871794	182.724637681159	175.759493670886	169.219178082191	158.746666666666	78	69	79	73	75	0.102361243587936
ENSMUST00000212706.1	ENSMUSG00000034807	Colgalt1	collagen beta(1-O)galactosyltransferase 1 [Source:MGI Symbol;Acc:MGI:1924348]	2860	215.513513513513	262.793103448275	210.681818181818	202.25	185.64	37	29	22	24	25	0.142079897418257
ENSMUST00000040324.13	ENSMUSG00000035829	Ppp1r26	protein phosphatase 1, regulatory subunit 26 [Source:MGI Symbol;Acc:MGI:2685193]	5466	139.774193548387	155.071428571428	124.096774193548	189.684210526315	143	31	42	31	19	23	0.863238081514297
ENSMUST00000189694.1	ENSMUSG00000035829	Ppp1r26	protein phosphatase 1, regulatory subunit 26 [Source:MGI Symbol;Acc:MGI:2685193]	5463	185.4	156.857142857142	182.833333333333	175.5	83.5	5	7	6	6	2	0.614712478356024
ENSMUST00000006912.11	ENSMUSG00000026737	Pip4k2a	phosphatidylinositol-5-phosphate 4-kinase, type II, alpha [Source:MGI Symbol;Acc:MGI:1298206]	3477	131.385542168674	138.106837606837	132.712195121951	124.079136690647	137.795652173913	249	234	205	139	230	0.614491026504455
ENSMUST00000100134.9	ENSMUSG00000025156	Gps1	G protein pathway suppressor 1 [Source:MGI Symbol;Acc:MGI:2384801]	1925	155.622222222222	154.75	161.535714285714	153	181.071428571428	45	40	56	41	42	0.419466629737241
ENSMUST00000208737.1	ENSMUSG00000025156	Gps1	G protein pathway suppressor 1 [Source:MGI Symbol;Acc:MGI:2384801]	1843	133.913333333333	144.330357142857	149.431034482758	134.012987012987	150.023255813953	150	112	116	77	129	0.540844235789799
ENSMUST00000116305.7	ENSMUSG00000025156	Gps1	G protein pathway suppressor 1 [Source:MGI Symbol;Acc:MGI:2384801]	1827	138.494444444444	123.106508875739	139.645714285714	123.893805309734	149.792452830188	180	169	175	113	159	0.580390511365433
ENSMUST00000172809.1	ENSMUSG00000025156	Gps1	G protein pathway suppressor 1 [Source:MGI Symbol;Acc:MGI:2384801]	2000	142.714285714285	144.073333333333	122.093959731543	129.583333333333	132.147887323943	140	150	149	84	142	0.0292292620048902
ENSMUST00000111611.7	ENSMUSG00000026705	Klhl20	kelch-like 20 [Source:MGI Symbol;Acc:MGI:2444855]	4072	182.192307692307	181.393939393939	162.589743589743	174.3125	172.291666666666	26	33	39	16	24	0.0819879602879137
ENSMUST00000140905.7	ENSMUSG00000026705	Klhl20	kelch-like 20 [Source:MGI Symbol;Acc:MGI:2444855]	4817	223.294117647058	136.583333333333	183.9	232	183	17	12	10	10	8	0.644093837924478
ENSMUST00000154249.7	ENSMUSG00000034171	Faah	fatty acid amide hydrolase [Source:MGI Symbol;Acc:MGI:109609]	5537	185.9	161.232142857142	159.522727272727	140.565217391304	168.22	40	56	44	23	50	0.300363581560852
ENSMUST00000049095.5	ENSMUSG00000034171	Faah	fatty acid amide hydrolase [Source:MGI Symbol;Acc:MGI:109609]	3827	150.343023255813	148.335078534031	143.662921348314	145.97619047619	151.409356725146	172	191	178	126	171	0.502589373320749
ENSMUST00000116420.3	ENSMUSG00000034442	Trmt5	TRM5 tRNA methyltransferase 5 [Source:MGI Symbol;Acc:MGI:1923607]	2066	149.255813953488	159.891891891891	165.419354838709	144.78947368421	151.9	43	37	31	19	20	0.954922220540041
ENSMUST00000237347.1	ENSMUSG00000037847	Nmrk1	nicotinamide riboside kinase 1 [Source:MGI Symbol;Acc:MGI:2147434]	1940	221.066666666666	154.333333333333	164.875	164.833333333333	171.6	15	24	8	6	10	0.471021710969495
ENSMUST00000017488.4	ENSMUSG00000017344	Vtn	vitronectin [Source:MGI Symbol;Acc:MGI:98940]	1744	106.352024922118	110.855457227138	105.056	108.436893203883	106.106299212598	321	339	250	206	254	0.400082635682142
ENSMUST00000113132.8	ENSMUSG00000038718	Pbx3	pre B cell leukemia homeobox 3 [Source:MGI Symbol;Acc:MGI:97496]	2734	137.036363636363	138.1	140.615384615384	132.347826086956	128.666666666666	55	40	26	23	42	0.4790498516009
ENSMUST00000213045.1	ENSMUSG00000031907	Zfp90	zinc finger protein 90 [Source:MGI Symbol;Acc:MGI:104786]	3447	182	127.333333333333	145.214285714285	96.5555555555555	129.818181818181	6	12	14	9	11	0.344900006016263
ENSMUST00000034382.7	ENSMUSG00000031907	Zfp90	zinc finger protein 90 [Source:MGI Symbol;Acc:MGI:104786]	2632	147.75	141.142857142857	185.4	178.2	169.777777777777	8	14	5	5	9	0.0133133465198134
ENSMUST00000054095.5	ENSMUSG00000037653	Kctd8	potassium channel tetramerisation domain containing 8 [Source:MGI Symbol;Acc:MGI:2443804]	2859	148.13953488372	127.881355932203	132.848484848484	140.72	165	43	59	33	25	33	0.61435012364201
ENSMUST00000037547.8	ENSMUSG00000040035	Disp2	dispatched RND tramsporter family member 2 [Source:MGI Symbol;Acc:MGI:2388733]	6626	151.045238095238	149.978922716627	141.389189189189	144.423333333333	144.606299212598	420	427	370	300	381	0.0152835795878219
ENSMUST00000236801.1	ENSMUSG00000059734	Ndufs8	NADH:ubiquinone oxidoreductase core subunit S8 [Source:MGI Symbol;Acc:MGI:2385079]	1005	96.0175438596491	104	111.432098765432	113.037735849056	109.246575342465	57	63	81	53	73	0.0422292409575303
ENSMUST00000075092.7	ENSMUSG00000059734	Ndufs8	NADH:ubiquinone oxidoreductase core subunit S8 [Source:MGI Symbol;Acc:MGI:2385079]	983	105.551282051282	103.066666666666	106.180327868852	101.5	112.967213114754	78	75	61	40	61	0.599398780311802
ENSMUST00000237341.1	ENSMUSG00000059734	Ndufs8	NADH:ubiquinone oxidoreductase core subunit S8 [Source:MGI Symbol;Acc:MGI:2385079]	780	103.737793851717	106.921440261865	104.068041237113	103.622093023255	107.222664015904	553	611	485	344	503	0.861133878177573
ENSMUST00000235847.1	ENSMUSG00000059734	Ndufs8	NADH:ubiquinone oxidoreductase core subunit S8 [Source:MGI Symbol;Acc:MGI:2385079]	977	104.666666666666	122.714285714285	110	107.357142857142	134.8	6	14	6	14	15	0.796768964295395
ENSMUST00000032824.9	ENSMUSG00000030603	Psmc4	proteasome (prosome, macropain) 26S subunit, ATPase, 4 [Source:MGI Symbol;Acc:MGI:1346093]	1440	129.116279069767	132.144736842105	117.694736842105	125.883838383838	134.077639751552	258	304	285	198	322	0.50034039238285
ENSMUST00000138512.7	ENSMUSG00000030603	Psmc4	proteasome (prosome, macropain) 26S subunit, ATPase, 4 [Source:MGI Symbol;Acc:MGI:1346093]	854	148.5	218	164.083333333333	149.777777777777	190.625	4	5	12	9	8	0.651267025129434
[truncated: 25,224 more rows]

## Sheet: poly(A) significant list
transcript	Gene.ID	Gene.name	Gene.description	Transcript.length.including.UTRs.and.CDS	WT2	WT3	KO1	KO2	KO3	WT2_reads	WT3_reads	KO1_reads	KO2_reads	KO3_reads	t.test
[truncated: 736 more rows]

[truncated: 4 more sheets: table2 - top15 polyA, expression, DESEQ2 significant list, table3 - DESEQ2]
