# Supplementary material
Source: HighWire-hosted journal article supplement (doi:10.1101/rna.079050.121)
Supplement: Supplemental_Table_4.xlsx [file Supplemental_Table_4.xlsx]

## Sheet: pAlength
Genes	CPEB1	CPEB2	NS1	NS2
Aaas	114.5	115	148.5	130
Aacs	110.5	100	151.5	156
Aak1	178	226	229	230
Aamdc	31	231	100	69.5
Aamp	108	126	86.5	83
Aar2	54	112.5	56	98
Aars	114	131	140	134.5
Aarsd1	128.5	114	154	150
Aasdhppt	122	163.5	144.5	130
Aatf	48.5	88	84.5	110
Aatk	131.5	198	127	184
Abat	61	37.5	118	54
Abca2	104	120	100	75.5
Abca5	89	80	148.5	103.5
Abca7	125	147	130	169.5
Abcb10	100	112	231	231
Abcb1b	40.5	41	44	60
Abcb4	27	24	35	98
Abcb6	81	104	122	138
Abcb9	126	118.5	99	117.5
Abcc2	172	191	231	102
Abcc5	86	79	209.5	224
Abcc8	157.5	42	231	123.5
Abcd3	110	107	135.5	129
Abce1	121.5	153	170	201
Abcf1	90	116	111	117
Abcf2	119	156	183.5	182
Abcf3	77	90	102	103.5
Abcg1	93	96	117	65
Abcg4	142.5	103.5	79.5	127
Abhd1	127.5	104	93	63
Abhd11	55	77	50.5	142
Abhd12	83.5	108	123	107
Abhd13	138.5	131	133	118
Abhd14a	97.5	98.5	81	125.5
Abhd14b	163.5	69	96.5	156
Abhd16a	101	107	97.5	79.5
Abhd17a	75	85	88	79.5
Abhd17b	207	231	202	189
Abhd17c	123	116	133	108.5
Abhd2	167	75.5	39.5	109
Abhd3	93	95	39	97
Abhd4	88.5	87	140	69
Abhd6	82.5	174.5	169	178
Abhd8	127.5	143	148.5	149
Abi1	141	132	197	119
Abi2	112	108	156	109
Ablim3	91	71.5	179	158
Abr	168	148	164.5	180
Abracl	190.5	73.5	105.5	184
Abt1	106.5	87	42	96.5
Abtb1	48	91	104.5	57
Abtb2	231	134	193	115
Acaa1a	110	111	101	104
Acaa2	100	191	141	136
Acad10	120	59	231	177
Acad11	89.5	145.5	164.5	220
Acad9	119	88.5	112	117
Acadl	125.5	150	153.5	120
Acadm	63	117.5	120	123
Acads	118.5	97	113	79.5
Acadvl	153	123	127	154
Acap2	96.5	72	82	30.5
Acap3	71	101	131.5	113
Acat1	65	70.5	69	84.5
Acbd3	121	198.5	106	128
Acbd4	101	104	211	210.5
Acbd6	85	95	120.5	83
Acd	63.5	51	64	147.5
Ache	83	106	130	112
Acin1	50.5	57	53	56
Acly	113.5	121.5	150	133
Aco1	109.5	119	135	139
Aco2	135	135	170	142
Acot1	222	53	141	133
Acot13	105.5	115	172.5	67.5
Acot2	100	77.5	146	97
Acot3	35.5	75	71.5	153
Acot7	94	107	122	113
Acot8	113	81	131	104.5
Acot9	115	126	186	180
Acp1	231	231	231	231
Acp2	130.5	145.5	121	137
Acp6	173	52.5	172.5	75
Acsbg1	116	129	141	147
Acsf2	46	92	80	163.5
Acsl1	164	124	108	161.5
Acsl3	108.5	94	117	147
Acsl4	106	111	117	119
Acsl5	80.5	73	97.5	112
Acsl6	154	117	203	216
Acss1	88	140	150	150.5
Acss2	103	111.5	201.5	152
Acta1	54	66.5	198	72.5
Actb	129	155.5	115.5	142
Actg1	167	230.5	211	214
Actl6a	135	129	98.5	129
Actl6b	119	151.5	164.5	181.5
Actn2	82.5	87	71	98.5
Actn4	44	65	84.5	48
Actr10	56.5	133	84.5	106
Actr1a	95	95	107	99
Actr1b	132.5	136.5	165	136.5
Actr2	73	97.5	199	110
Actr3	100	105	128	135.5
Actr3b	40	64	95	78
Actr5	135.5	57	155.5	94
Actr6	134	124.5	138	82
Acvr2a	59	149	231	169.5
Acy1	46	41.5	114.5	79
Acy3	75	88.5	205.5	97.5
Acyp1	189.5	171	170	157.5
Acyp2	102.5	100	125.5	107
Adam10	93	97.5	157	109
Adam15	104	109	102	102
Adam17	76	144	193	112
Adam19	74.5	79	76	87
Adamts1	196	231	89	102
Adamts10	79	104	96	107
Adamts15	135	181	116.5	131
Adamtsl4	132	137	37	76
Adap1	82	101	101.5	113
Adarb1	151	144	151	160
Adck4	80.5	231	134	78.5
Adck5	120	231	181	131
Adcy2	93	98.5	115	98
Adcy3	120	113	127	156.5
Adcy5	158	119	170.5	189
Adcy6	117	125	230	189
Adcy8	102	122	132	118
Adcyap1r1	141	131.5	131	143.5
Add1	87	93	88	90
Add2	113.5	200	104	82.5
Add3	106	142	151	124
Adh5	88	90	104	104
Adhfe1	220	210	185	190
Adipor1	92.5	105	96.5	222
Adk	86	99.5	131.5	106
Adm	173	185	138.5	231
Adnp	107.5	122	135.5	126
Adnp2	135	84	88.5	67
Adora2b	74	160	192	150.5
Adpgk	47	135	136.5	168
Adprh	59	55	108.5	74
Adprhl2	107	86	63.5	119.5
Adprm	80	130	129.5	160.5
Adra2a	104.5	118	132	139.5
Adrbk1	62	55	77	124
Adrm1	102	113	90	101.5
Adsl	111	135.5	132	169
Adss	154	117	125	107
Aes	99	115	118	116
Aff4	127	125	148	125
Afg3l1	72	99	98	54.5
Afg3l2	138	137.5	172	173.5
Aga	96	100.5	131.5	125
Agap1	60	79	145.5	114
Agap2	99.5	128	144	139
Agap3	109	107.5	119.5	120
Agfg1	164.5	149.5	181	180.5
Agfg2	102	138	120	112
Agk	101	158	91	169
Agl	96.5	145	177	152.5
Agpat1	101	134	157	169
Agpat3	110	124	136	126.5
Agpat4	92	119	89	90.5
Agpat5	135	94	142	176.5
Agpat6	132	145	161	169
Agrn	124	129	144	157.5
Agrp	89.5	143	104	124
Agt	148	146.5	158.5	64
Agtpbp1	128	133	156	143
Ahctf1	155	205	91.5	164
Ahcy	103.5	231	73	17
Ahcyl1	135	134	133	136
Ahcyl2	141	137	162.5	146.5
Ahdc1	152	169.5	200	216
Ahnak	121	120	187	165
Ahsa1	98	123	155	139
Ahsa2	136.5	127	141	127
Aida	77	102	74.5	88
Aifm3	99	142.5	85	115.5
Aig1	126	160	151.5	141
Aimp1	71.5	131	154.5	169
Aimp2	57.5	79	49.5	122
Aip	89	80	108	114.5
Ajap1	132	127	162	163
Ak1	74	91	77.5	98
Ak2	61	65	40	128
Ak3	62.5	63.5	113.5	76
Ak7	70	143	145.5	21
Akap10	153	137	164.5	103
Akap11	89.5	120	105	114
Akap12	79	85	122.5	85.5
Akap13	123	110	131	153
Akap17a	82	101.5	84	94
Akap6	72	48	50.5	98
Akap8	160	172	189	225.5
Akap8l	90	77	80	75
Akap9	132.5	116	130	143.5
Akip1	91.5	77	64	98
Akirin2	129.5	139.5	174.5	143
Akna	156	193	231	231
Akr1a1	88	91	100	97
Akr1b1	76	85	114	120
Akr1e2	139	66	97.5	131
Akr7a2	65.5	86	78	81
Akt1s1	53	59	65	63
Aktip	153	131.5	126.5	159.5
Alad	87	66	89	94
Alas1	52	101	76	87
Alcam	138	90.5	173	140
Aldh16a1	104.5	99	131	114.5
Aldh1a1	87.5	107	94.5	87
Aldh1b1	119.5	125	131	146
Aldh1l1	134.5	58	171.5	164.5
Aldh1l2	141.5	82.5	116	77.5
Aldh2	98.5	99	94	91.5
Aldh3a2	69.5	111	140	123
Aldh3b1	129.5	69	82	132
Aldh4a1	86	89	169	174
Aldh5a1	147	110	156.5	127
Aldh6a1	82	145	179	127.5
Aldh7a1	68.5	98.5	70	96.5
Aldoa	67	74	78	76
Aldoc	92	100.5	107	112
Alg1	99.5	144	95	151.5
Alg11	141	230	213	153
Alg13	134	77	108	148.5
Alg14	94	143.5	143	149
Alg2	101.5	112	142	139
Alg3	62	85	132	84
Alg5	140	154	186.5	164.5
Alg6	79	92	168.5	125
Alg8	72	71	196	177
Alg9	75	94	108	128
Alkbh1	156	96	136	124
Alkbh2	130	51	92	65
Alkbh3	117	137	139	104
Alkbh4	97	74	66	80
Alkbh5	32	166	62	109
Alkbh7	93	117	126	119
Alms1	110	123	120.5	131.5
Alpl	231	231	219	231
Alyref	80	99.5	113	112
Amacr	147	123	150	110
Ambra1	79	77	139	78
Amd1	101	95	120	117
Amdhd2	113	87.5	90	91
Amigo2	52.5	109	172	115.5
Amigo3	98	126	173	131.5
Ammecr1l	87	111	115.5	133
Amn1	105	127	137.5	131.5
Amotl2	89	119.5	66	116
Ampd2	67.5	117.5	44	63.5
Ampd3	146	132	170	160
Amt	73	88	72	77
Amz2	150	154	180	177
Anapc1	46.5	88	91	118
Anapc11	107	98.5	92	113.5
Anapc13	82.5	74	145.5	135
Anapc15	102	108	103	84
Anapc2	47	79	103.5	59
Anapc4	101.5	156	134.5	140
Anapc5	75	94	85	98
Anapc7	65	70	113.5	112
Angel1	40	82	132	115.5
Ankfy1	108	130	104	99
Ankhd1	111	78.5	167.5	106
Ankib1	156	137.5	160	160
Ankmy2	89	101.5	104	94
Ankrd10	223.5	69	203.5	231
Ankrd12	25	53	166	131
Ankrd13a	111.5	127	156	124
Ankrd13d	97	105	79.5	115
Ankrd16	136.5	103	148.5	124
Ankrd17	52	121	139.5	102
Ankrd29	65	79	164	146
Ankrd32	130	68	109	132
Ankrd34a	93	86	144	117
Ankrd40	104.5	139	162	162.5
Ankrd42	127.5	231	110	231
Ankrd44	169	99	107	174.5
Ankrd46	65.5	99	95	87
Ankrd49	151.5	63	90.5	220.5
Ankrd50	83.5	60	80.5	110
Ankrd54	87	112	69.5	138
Ankrd6	90	100	109.5	125
Ankrd9	126	116	85	127
Anks1a	129	132	158	137
Anks1b	78	77.5	147.5	71
Anks3	169	230.5	231	168
Anks6	184	210	231	136.5
Ankzf1	158	151	147	222
Ano4	36	148	174	231
Ano6	151	171	197	145
Anp32a	56	45.5	70.5	70
Anp32b	92	94	133	104
Anp32e	84	114	89	100
Antxr1	57	119	52	134
Anxa1	137.5	164	118.5	120.5
Anxa11	121	115	143	134
Anxa2	107.5	130	137.5	127
Anxa3	217.5	62	113	145
Anxa4	111.5	93	109	92
Anxa5	120	123	161.5	161
Anxa6	106	107	122	105
Anxa7	139	133	197.5	120
Ap1ar	69.5	110	153	131.5
Ap1b1	72.5	95	96	104
Ap1g1	116.5	108	131	117
Ap1m1	77	97	133	125.5
Ap1s1	98	109.5	132	142.5
Ap1s2	99.5	141	140	132
Ap2a1	110	59	82	52
Ap2a2	83	91.5	146	115.5
Ap2m1	124	126	129	133
Ap2s1	108	116	117.5	117
Ap3b1	145	103	167	138
Ap3d1	98	115	142	114
Ap3m1	168	224.5	166	221
Ap3m2	45	88	88	172.5
Ap3s1	100.5	108.5	159	139
Ap3s2	111	139.5	134	118
Ap4b1	100	106	114	99
Ap4s1	89	71	103	125
Ap5b1	82.5	132	96	84
Ap5m1	231	107	231	231
Ap5s1	119.5	66.5	119	136.5
Ap5z1	143	201.5	164.5	157
Apba3	84	79	145	135
Apbb1	76	83.5	83.5	87
Apbb3	94	120	99	106.5
Apc2	135.5	143.5	139	134.5
Apeh	123	112	120	122
Apex1	106	99.5	131	75
Aph1a	150.5	120	156	148.5
Api5	100	107.5	125	50
Apip	92	140.5	231	112
Apitd1	99.5	92	104	96
Apln	79.5	231	231	143
Aplp1	82	95	118	105
Aplp2	170	172	185	188.5
Apmap	107.5	157.5	169.5	148.5
Apoa1bp	80	77	79	86
Apoc1	65	226	106	130
Apod	136	72	230	80
Apoe	110.5	112	102.5	133
Apof	230.5	205	121.5	230
Apoo	109.5	90	157	100
Apool	63	123	96	121
Apopt1	122.5	122	160	142
App	121	111	120	131.5
Appbp2	101	113	157	151
Appl2	145	79	142.5	137
Aprt	44.5	79	45	45
Aqp11	150	120.5	95	126
Aqp4	136	136	164	153.5
Aqp9	97	72	148	178
Aqr	108	102	135	143
Araf	59	95	97	117.5
Arcn1	83.5	70	110.5	115
Arel1	104	121	117	131.5
Arf2	125	139	124	137.5
Arf3	60	82	32	28
Arf4	96	103	108	99
Arf5	72.5	78	74	86
Arf6	63	79.5	96	106.5
Arfgap1	72.5	40	64	101
Arfgap2	189	96	157	118
Arfgap3	110	131.5	180	119
Arfgef1	163	147	209	169
Arfgef2	175	171.5	28	190
Arfip2	104	86	129	141
Arfrp1	64	71	69.5	106
Arg2	105	38	105	138.5
Arglu1	58.5	95	101	107
Arhgap1	76	92	112	88
Arhgap12	127	128	129.5	123
Arhgap17	70	101	135	105
Arhgap21	107.5	193	65	159.5
Arhgap35	227.5	230	231	231
Arhgap39	69	79.5	130	105
Arhgdia	72.5	90	71	88
Arhgdig	64	67	62	75
Arhgef18	149	154	180	132
Arhgef19	27	53	19	47
Arhgef2	61	111	113	104
Arhgef25	81	82.5	73	88
Arhgef28	104	63	106.5	125
Arhgef3	122	171	153	158
Arhgef40	141	154	107.5	130
Arhgef7	82	81	109	93.5
Arhgef9	47	97	87	43.5
Arid1a	96.5	137.5	102	117
Arid4a	34	174	231	192
Arid5a	65.5	107	127	171.5
Arih1	96	130	109.5	119
Arih2	82	144	101.5	188.5
Arl1	137	113.5	62	112
Arl13b	123	103.5	72	176
Arl14ep	99	150	130.5	166
Arl2	66	82	99.5	90
Arl2bp	149	152	141	147
Arl3	77	74	95	109
Arl4a	110	78	95	113
Arl4d	34	79.5	86	87
Arl6ip1	132	115.5	141	139.5
Arl6ip4	38.5	66	37.5	63
Arl6ip6	158	95	132.5	101
Arl8a	124	131	144	136
Arl8b	100	111	122	118.5
Armc1	86.5	176	131	130.5
Armc10	119	114	148.5	131
Armc5	84	105	132	151
Armc7	54	124	135	166
Armc8	93.5	107	152	141
Armc9	57	94	68.5	89
Armcx2	125	112	120.5	127
Armcx3	158.5	140	147.5	163
Armcx6	148	166.5	133	115
Arnt2	148	144	184.5	169
Arntl	62	58.5	150.5	106
Arpc1a	111.5	124.5	165.5	143
Arpc1b	80	52	94.5	103.5
Arpc2	67.5	88	75	100
Arpc3	84.5	114	131.5	144
Arpc4	83.5	91.5	89	91
Arpc5	94	103.5	123.5	109
Arpc5l	63.5	98	83	100
Arpp21	148	142	143	136
Arrdc1	99.5	130	132	91
Arrdc2	180	137	197	166
Arsa	94	168	111	169
Arsb	95.5	122	103.5	114
Arv1	126	77	78	130
Arvcf	192	225.5	231	230.5
Arx	86	84	115	111.5
Asah1	116	154	128	133
Asb1	30	44	64	111.5
Asb8	124	149.5	151.5	137
Ascc1	71	100	79	112.5
Ascc2	57	86	41	136.5
Ascc3	130.5	126	188	181.5
Asf1a	125	107	134.5	125.5
Ash1l	37	90.5	72	70
Asic1	122	140.5	143	126
Asic2	83	82	89.5	97.5
Asic4	121	229.5	230.5	231
Asmtl	126.5	138	131.5	132
Asna1	87	90	89	98
Asns	65.5	56	36.5	69
Asnsd1	83	88.5	124.5	98.5
Aspdh	92	183.5	113	112.5
Asphd2	104.5	111.5	114	120.5
Asrgl1	61.5	90	87	96
Astn1	121	125.5	164.5	124.5
Atad1	92	110	124	106
Atad3a	108	92	118.5	105
Atat1	132.5	106	207	122
Atcay	85	96	123	84.5
Atf1	115	121	133.5	178
Atf4	138	136	132	141
Atf5	114.5	86	45	77
Atf6b	94.5	113	116	94
Atg10	109	114	92.5	89
Atg12	130	130	123	145
Atg13	35	58.5	78	81
Atg14	79	113	24	90
Atg16l1	74.5	78	108	80
Atg2a	85	136	91	114
Atg3	128	142	182	147.5
Atg4al1	155	145	227	104
Atg4b	132	122	126	115
Atg4d	76.5	94.5	126	106
Atg5	99	123	142.5	134.5
Atg7	68	79	79	81
Atg9a	100	117	139	113
Atl1	108.5	99	125	120
Atmin	78	125.5	119	66.5
Atox1	62.5	74.5	59	64
Atp11a	84	105.5	147	123
Atp13a1	99	93	65	91
Atp13a2	84	110	113	102
Atp1a1	158	166	147	160
Atp1a2	66	77	103	98
Atp1a3	117	114.5	140	129.5
Atp1b1	150	167	185	178
Atp1b2	128	127.5	188.5	172.5
Atp1b3	111.5	131	190	146.5
Atp2a2	121	115	143	135
Atp2b1	82.5	151	231	119
Atp2b2	130.5	146	155	126
Atp2c1	114	95.5	132.5	105
Atp5a1	72	80	70.5	74
Atp5b	124.5	130	141	140
Atp5c1	66	80	62	70.5
Atp5d	80.5	98	111	101
Atp5e	73.5	91.5	70	72
Atp5g1	68	79	82.5	81
Atp5g2	101	105	108	112
Atp5g3	83	91	100	99
Atp5h	45	54.5	52	53.5
Atp5i	87.5	104	85	97
Atp5j	58.5	54.5	83	77
Atp5j2	69	73	83	94.5
Atp5l	98	101	115	117
Atp5o	78	87	89	93.5
Atp5s	76	147.5	74	155.5
Atp5sl	93	61.5	81	88.5
Atp6ap1	114	136.5	138	140
Atp6ap2	68	82	118	95.5
Atp6v0a1	109	106	117	115
Atp6v0b	82	88	81	90.5
Atp6v0c	91	95	93	97
Atp6v0d1	84	94	108	101
Atp6v0e1	99.5	99	112	98
Atp6v1a	126	137	160	144
Atp6v1b2	128	128	165	140
Atp6v1c1	119	119	140.5	145
Atp6v1c2	95	72.5	146	99
Atp6v1d	116	131	160	148
Atp6v1e1	149	131	153	154.5
Atp6v1f	98.5	95	100	110
Atp6v1g1	96	102	107	108
Atp6v1g2	118	134	126.5	126
Atp6v1h	96	114	113	91
Atp8b2	117	109.5	137	125
Atp9b	90	36.5	55	104.5
Atpaf1	82	118	49.5	144
Atpaf2	133	199	194	189
Atpif1	82	78.5	111	97.5
Atraid	110	132	125	141
Atrip	81	121.5	133	83
Atrn	184	195	223	208.5
Atxn1	176	101	120	64
Atxn10	91	98.5	102.5	104
Atxn2l	132.5	135.5	192	162
Atxn7l3b	169	160	158	179
Auh	143.5	171.5	211	197
Aup1	48	106	34	84
Aurkaip1	83	86.5	105.5	106.5
Aurkb	78.5	54	143	72
Aven	105	73	98.5	109.5
Avpi1	113	118	57	126
Axin1	222	92.5	231	188.5
Azi2	152.5	168	195	192
Azin1	130	106.5	158	133
B2m	103.5	111.5	127	113
B3galnt1	133.5	140	160	149
B3galnt2	133	93	105.5	69.5
B3galt2	44	231	130.5	131
B3galt4	68	29	163	220
B3gat2	76	138.5	205	116
B3gat3	92	98	96	106
B3gnt2	58	115	115	120
B4galnt1	91	83	113	109
B4galnt4	130	133	162	166
B4galt2	57	84.5	86.5	134
B4galt3	71	121.5	85	76
B4galt4	166	223	121.5	100
B4galt5	125	135	62	150
B4galt6	95	104	112	123
B4galt7	123.5	94	142.5	132
B9d2	121	97.5	131.5	118
Baalc	122.5	85	130	140.5
Babam1	61	85	66.5	84.5
Bace2	42.5	35	196	61
Bad	84	99.5	61	112.5
Bag1	70	81	82	72
Bag2	72	102.5	72	104
Bag3	138.5	109	77	91
Bag4	64	89	47	79.5
Bag5	74	90.5	100	108
Bag6	136	140.5	169	144
Bai1	103.5	181.5	155	144
Bai2	105	119	116	119
Bai3	131	175	151	156
Baiap2	64	135.5	78.5	108
Bak1	75.5	109.5	112	134
Bambi	78	60.5	97.5	109
Banf1	107	106	142.5	108.5
Bank1	102	28	191	205
Bap1	150.5	163	175	161
Basp1	132	162	91	141
Bax	157	146	154	152
Baz1a	110	76	37	124
Baz1b	133.5	214	172	197
Baz2a	58.5	119.5	155	150.5
Bbc3	149.5	141.5	144	149
Bbs1	143	219.5	207	185
Bbs10	56	38	100.5	59.5
Bbs2	85	169.5	231	170
Bbs4	175	135.5	158	206
Bbs5	105	98	198.5	135
Bcam	176	164	157	159
Bcan	29	22	61	201
Bcap29	192.5	136	159.5	152.5
Bcap31	69.5	77.5	87.5	83
Bcar1	94	116	114	115
Bcar3	158	216	181	212.5
Bcas2	68	78.5	107	107
Bcas3	153	128.5	91	108
Bcat1	165	179	185	173
Bcat2	79.5	77	93	114
Bccip	80	126	181	117
Bckdha	125	100	94	110
Bckdhb	91	110	101	134.5
Bckdk	68	89	106	92
Bcl10	124.5	100	145.5	128
Bcl11a	72.5	68	62	74
Bcl11b	115	98	140.5	141
Bcl2l12	61	48	121.5	165
Bcl2l2	131	101	160.5	86
Bcl6	177	112	191.5	178
Bcl7b	209	210	191	128
Bcl7c	48	57	44	57
Bcl9l	81	37	135	81
Bclaf1	132	170	128	231
Bcor	115	133	156	136
Bcorl1	122	106.5	80	70
Bcs1l	130	108.5	124	97.5
Bdh1	104	143.5	138	149
Bdh2	145	114.5	139.5	122.5
Bdnf	75	119	105	96.5
Becn1	88	113	129.5	124.5
Begain	127	154	177	166.5
Bend5	207	223	183	228
Bet1	81	87	135	90.5
Bet1l	108	88	127	121
Bex1	73	90	69	95.5
Bex2	104.5	116	92	88.5
Bex4	97.5	110	100	113
Bfar	167	231	195	201.5
Bgn	65	113	43	123
Bhlhb9	122	97	122.5	171
Bhlhe22	115	112	110.5	118
Bhmt	97.5	136	110	109
Bicd2	129	141	177	199
Bin1	86	161.5	150	128
Bin3	62	121	106	113.5
Birc2	47	65	91	156.5
Birc6	132	130	143	146
Blcap	98	111.5	113	111.5
Bles03	54	63.5	102	80
Blmh	133.5	135.5	130	146
Bloc1s1	72	86	101	93
Bloc1s2	120	126	170	126
Bloc1s4	147.5	98	129	146
Bloc1s5	114	165	140.5	100
Bloc1s6	156	130.5	126.5	145
Blvrb	72	73	52	69
Blzf1	17.5	32	68	45
Bmp1	103	188	159	116
Bmp7	94	181	227	134
Bmper	231	69.5	231	160
Bmpr1a	164	111	161	127
Bmpr2	50	44	78	143
Bms1	56	85	116	160
Bmyc	58	53	45.5	52
Bnip1	65	91	115.5	84.5
Bnip3	67	69.5	127.5	92.5
Bnip3l	137.5	143.5	160.5	161
Bod1	88	113	94	100
Bok	88	113	119	109
Bola1	63	100	71	65
Bola3	80.5	107.5	128	103
Bop1	61	81	68	64
Bpgm	125	125	140	133
Bphl	146	209	183.5	177
Bpnt1	80	69.5	63	101.5
Brap	125	231	210	118
Brcc3	139.5	118.5	225.5	143
Brd1	74	133	74.5	213.5
Brd3	76	85	73	63
Brd4	121	115	151	126
Brd7	134	131	145.5	147
Brd8	142	152.5	104.5	151
Brd9	187	139	139.5	139.5
Bre	146	100	138	154
Brf1	72.5	120.5	131	167.5
Brf2	108	130	122	133
Bri3	72.5	80.5	67	84
Bri3bp	162	147	23	202
Brinp2	137.5	123	166.5	162
Brinp3	181.5	231	156	126
Brix1	153	207	195.5	190.5
Brk1	123	113	123.5	133
Brox	121	121	148	128
Brpf1	67.5	34	178	189
Bscl2	51	82	96.5	107
Bsdc1	149	169	183	207
Bsg	147	144.5	174	165
Bsn	139	162	166	171
Bspry	129	194	154	165
Btaf1	195	147	143	144.5
Btbd1	103	119	130	117
Btbd10	120.5	115	142.5	146
Btbd6	129.5	182	153	174
Btf3	69	38	30.5	34.5
Btg1	107	116	116	97.5
Btg2	140	130	154.5	156
Btg3	95	168	231	165
Btrc	102	70	156	97
Bub3	68	119	113.5	85
Bud13	109	52.5	25	68
Bud31	75.5	81	80	94
Bysl	38	54.5	72.5	75
Bzw1	124.5	106	153	94.5
C1d	131	131	149	148
C1galt1c1	103	73.5	116	90.5
C1H6orf35	104.5	211.5	175	214
C1qbp	103	112.5	130	124.5
C1ql1	77	51.5	104	50.5
C1qtnf2	59	113	137	108
C1qtnf3	102	162	147	112.5
C1qtnf4	79	83	85.5	88
C1qtnf5	134	113	140	135
C1r	92	94.5	230	173
C1s	175	150	134	181
C2	65	53	59.5	162
C2cd2	75.5	140	89	62
C2cd2l	106	139	190.5	117.5
C2cd5	45	152	150	83
C3	144.5	129.5	173	149
Caap1	110	169.5	136.5	209.5
Cab39	152	205.5	216	182.5
Cab39l	96	136	119	146
Cabin1	170	101	127	122
Cables1	138	101	129	91.5
Cabp1	124.5	118	85	123
Cabp7	95	168	158	172
Cacfd1	87.5	77	102	52
Cachd1	96	42	132	143
Cacna1a	116	103	180.5	160.5
Cacna1b	177.5	206.5	230	206
Cacna1c	58.5	72.5	101	68
Cacna1g	101	116.5	155	152
Cacna1h	108	230	231	225
Cacna2d3	119	50.5	72	103
Cacnb1	133	128	144.5	133
Cacnb2	109	88	114.5	129
Cacnb3	106.5	120	119.5	101.5
Cactin	147	134	59.5	83
Cacul1	81.5	85	100	67
Cacybp	101	106	132.5	122
Cad	122	74	135.5	83
Cadm1	85	119	150.5	136.5
Calb1	101	126	125	125
Calb2	102.5	131	102.5	113.5
Calhm2	102.5	65	70	89.5
Calm1	74	91	92	88
Calm2	75	93	81	101
Calm3	80	88	86	83
Calml4	136.5	108	152	159
Calr	66	68	91	96
Calu	103	124.5	163	160.5
Caly	78	87.5	92	85
Camk1	74.5	71	94	126
Camk1d	231	39	181	57
Camk1g	123	101	156	146
Camk2b	106	124	167	140
Camk2n1	110	112	72.5	113
Camk4	192	56	127	56
Camkk1	132	157	159.5	145
Camkk2	66	74	98.5	60
Camkmt	83	132.5	183	126.5
Camkv	127	126	135	141
Camlg	133.5	134.5	102	150
Camsap1	134.5	113.5	146.5	183
Camsap2	88.5	113	92.5	104.5
Camsap3	78.5	74	67	79.5
Camta1	116	140	157.5	126
Camta2	102	127	122.5	108
Cand1	111	120	109.5	121
Cand2	85	87.5	89	84
Cant1	94	100.5	96.5	140.5
Canx	96	120	127.5	120.5
Cap1	138	142	157	150
Cap2	88	156	44.5	93
Capg	57	47	78.5	86
Capn10	171	212	229	231
Capn15	110	77	230	98
Capn2	117	123	144	129.5
Capn6	114	126	166	181
Capn7	154	86	170	129
Caprin1	68	93	141.5	95.5
Capsl	72	90	157.5	67.5
Capza1	90	88	113	103
Capza2	100	119	142.5	122.5
Capzb	181.5	195	197	196
Car11	106	131	91	127
Car2	134	140.5	156	135
Carhsp1	83.5	105	109	88
Carkd	115	121	146.5	146
Carm1	108	130.5	152	132
Cars	117.5	136	154	130.5
Cars2	98	70	120	94
Casc1	151.5	54.5	122	90
Casc4	90	94	148	110
Caskin1	121	111	116	147
Caskin2	75	137.5	145	150
Casp2	106	97	131	132.5
Casp3	90	76	132	100
Casp4	134	202.5	155	211
Casp6	83	98	97	184
Casp7	93	118	153	50.5
Casp8ap2	54	93	99	92
Casp9	137.5	130	103.5	162
Casq1	29	65	132	138
Casq2	186	96	126	128.5
Cast	113.5	111	129	136
Cat	91.5	106	91	85.5
Catsper2	210.5	51	107	168
Cav1	101	77	105	93
Cav2	128.5	117	143.5	62
Cbfb	74	128	136	119.5
Cbll1	115	138	112	82
Cbln1	117	114	160.5	92
Cbln2	104	231	228	125
Cbr3	18	64	76	169
Cbr4	109	92.5	111	132
Cbs	94	75	144	99
Cbx3	37	54	64	75
Cbx5	100.5	61	90	133.5
Cbx7	121	214.5	52	110.5
Cbx8	100.5	115	117	40
Cc2d1a	103.5	137	117	156.5
Cc2d1b	131	162	152.5	231
Ccar1	79	82	117	126
Ccar2	108.5	129	172	177.5
Ccdc101	231	133	161	163
Ccdc102a	83.5	76.5	141	103
Ccdc104	74.5	96	106	108.5
Ccdc112	56.5	89	69	52
Ccdc114	61	165	27	123.5
Ccdc12	74	89.5	111	104
Ccdc124	103	115	138	110
Ccdc126	123	165	165	80
Ccdc130	87	88.5	117	108
Ccdc153	160.5	133	137	78
Ccdc167	59	70	42	68
Ccdc17	137	85	194	92
Ccdc174	103.5	121	138	137
Ccdc176	56	231	65	202.5
Ccdc181	56.5	84	82	60.5
Ccdc184	72	78	92	95.5
Ccdc22	94	72	73	119
Ccdc23	63	75	114	94
Ccdc25	126.5	128	178	104
Ccdc28a	81	81.5	75	98
Ccdc28b	87	105	98	107
Ccdc32	84	98	87	103
Ccdc34	89	80.5	49	52
Ccdc39	111	231	231	231
Ccdc43	52	99	43	27.5
Ccdc47	121.5	154	188	172.5
Ccdc50	104.5	109	119	97
Ccdc51	139	107.5	104	111.5
Ccdc53	102	99	72	110
Ccdc58	68.5	83	80.5	101.5
Ccdc59	174	112.5	165.5	216
Ccdc61	58	28	61	87
Ccdc62	63	185	135	123.5
Ccdc64	206	231	208	191
Ccdc65	70	74	81	65
Ccdc71	91	126	154	138
Ccdc8	191.5	124	128	192
Ccdc80	78	75.5	80	84
Ccdc90b	127.5	122	141	141.5
Ccdc91	97	75	85	84
Ccdc92	86	67	109.5	111
Ccdc93	113	121.5	203	212
Ccdc94	231	231	231	218
Ccdc97	108	101.5	124	109
Cchcr1	67	121.5	103	103
Cck	79	85	79.5	85.5
Ccl2	110	134	104	128.5
Ccl27	41	113	71.5	51
Ccl7	66	127	106.5	182
Ccm2	107.5	81	163.5	119
Ccnc	165	127	230	231
Ccnd1	150.5	110	149.5	143
Ccnd2	82	111	119	126
Ccnd3	148	98	55.5	121
Ccndbp1	97	87.5	83	117.5
Ccne1	42.5	121.5	100.5	77
Ccng1	105.5	112.5	114	117
Ccng2	123.5	94.5	153	131
Ccnh	111	107	123	107
Ccni	60	65	72	69
Ccnjl	108.5	115	122	128
Ccnk	166	169	145	180
Ccnl1	90.5	143.5	175	117
Ccnl2	119	125	169	51.5
Ccnt2	224	155.5	107	168
Ccp110	142	116	188	141
Ccpg1	121	116.5	124.5	116
Ccrn4l	220.5	127	135	127
Cct2	67	76.5	109	120
Cct3	90.5	110.5	105	105.5
Cct4	97	112.5	126	140
Cct5	95	100	104	105.5
Cct6a	74	60	96.5	71
Cct7	75	108.5	105	106.5
Cct8	93	109	100	107
Ccz1	58.5	66.5	184	94.5
Cd14	62	54	73	84
Cd164	115	85	172	119
Cd1d1	140.5	98	166	147
Cd200	99.5	119	147	125
Cd24	142	142	170	167
Cd276	101	175	216.5	231
Cd2bp2	56	49	64	58
Cd320	48	90	102	108
Cd40	119.5	54	129	120
Cd44	54	48.5	63	94
Cd47	77.5	101	107	147
Cd59	67.5	88.5	83.5	96
Cd63	62.5	70	64	76
Cd81	90	99	93	102
Cd82	104	118	126	88
Cd9	127	142	155	152
Cd99	51	69	54	58.5
Cdadc1	187	151	165	177
Cdc123	122	127	189	192
Cdc16	128	137	125	139.5
Cdc23	144	68	67.5	99
Cdc25a	109	172	142.5	172
Cdc26	59	95	145.5	135
Cdc27	47.5	53	193	90
Cdc34	73	96	108	84
Cdc37	110	115	122	118
Cdc37l1	67	92	214.5	138
Cdc40	101	137	107.5	122
Cdc42	57	58.5	80	70
Cdc42bpa	64	189	117.5	151
Cdc42bpb	129	127	132	138
Cdc42ep1	151	102	201	155
Cdc42ep2	70	90.5	124	108
Cdc42ep3	64.5	55	172	106
Cdc42ep4	111	155	132	117
Cdc42ep5	87	79	81.5	129
Cdc42se1	134	156	202	149
Cdc42se2	81.5	121	140	172.5
Cdc5l	111	127.5	133.5	171
Cdc7	72.5	134	201	132
Cdc73	68	83.5	95.5	219
Cdca4	119	59	125	132
Cdh10	72	79	132	73
Cdh11	130	124	151	127
Cdh13	106	120	147	132
Cdh2	121.5	121	136	139
Cdh22	55	95.5	80	133
Cdh3	151	106.5	173	187
Cdh6	80	55	217	108
Cdh9	157	212	169	180
Cdip1	97	102	108	122
Cdipt	139	133	144	154
Cdk1	62	86	138	112.5
Cdk10	94	119	99	94
Cdk11b	95	143	136	116.5
Cdk12	124	194.5	140	113.5
Cdk13	46	81	80	73
Cdk16	107.5	109	120.5	128
Cdk17	75	124	133	96.5
Cdk19	77	82	136	55.5
Cdk2ap1	53	75	115.5	103
Cdk2ap2	71	94	95	80
Cdk4	67.5	79	114	130
Cdk5	74	73	56	66.5
Cdk5rap2	98.5	113.5	109	83
Cdk5rap3	114	89.5	122.5	98
Cdk8	225.5	198.5	231	225
Cdk9	82	97	106	114
Cdkl2	35	19	158	145
Cdkn1a	98	95	108	96
Cdkn1b	101.5	62.5	69	82
Cdkn2aipnl	124	76	72	83
Cdkn2b	110.5	143.5	72	151.5
Cdkn2c	110	54	103	90
Cdo1	126	104	156	128.5
Cdr2	90	153.5	164	179
Cds1	138	231	80	50
Cdt1	100.5	168	77	147
Cebpa	131.5	161	141.5	143
Cebpd	108.5	115	157	132
Cebpg	110	95	130	67
Cebpz	153	127.5	144.5	167
Cecr5	92	110	89	115
Celf1	134	143	165	67.5
Celf3	199	226	231	224
Celf4	55	64	53	68
Celf5	109	97	168	135
Celsr3	123	146	167.5	172
Cenpc	71	102	74	91
Cenpl	231	231	223	85
Cenpn	212.5	91	181	177
Cep120	106	137	181.5	211.5
Cep131	74	121	100	95
Cep19	96	99.5	112	99
Cep290	96.5	42	173	124.5
Cep44	116.5	125	105	110
Cep57	140	166	154	129
Cep63	113	96	141	79
Cep78	102.5	127	114.5	98
Cep83	136	172	91	111
Cep95	47	149	117.5	100
Cep97	106	108	150	129.5
Cept1	158	163	176	174
Cercam	169	47	138	99
Cerk	131.5	145	169	150
Cers1	103	87	120.5	110
Cers2	116	69	151	149
Cers4	73	78	65	108
Cers5	114	72.5	78	83
Cetn4	74	75	112	70
Cfap20	68	109	120	108
Cfdp1	79	97	91	84.5
Cfl1	126	133	125	123
Cfl2	61	83	93	82.5
Cggbp1	97	75	125	130
Cgnl1	87.5	170	171	145
Cgref1	76	103.5	115	112
Cgrrf1	113	114	105	112.5
Chac1	108	128	99	118
Chaf1b	52.5	164	24	91
Champ1	55	126	76	81
Chchd1	66.5	90	137	94
Chchd10	73	104	144	120.5
Chchd3	127	158	171	150
Chchd4	149.5	55.5	92	151
Chchd5	56	89	50	63
Chchd6	56.5	86	72	93.5
Chd1	136	199.5	171	144
Chd5	75.5	161	157	92.5
Chd6	94.5	125.5	188	140
Chd8	36.5	39.5	51	78
Chdh	126	88.5	99	96.5
Chek1	107	162.5	157	231
Cherp	114.5	78	147.5	114
Chfr	127	107	119.5	127
Chga	130.5	137	159.5	180
Chgb	138	130.5	165	164
Chi3l1	100	120.5	133.5	135.5
Chic2	181	156	170	125
Chka	149.5	134.5	154	163
Chkb	148	141	156.5	111
Chmp1a	165.5	163	171	177
Chmp1b	138	105	183	155
Chmp2a	70	81	89	98
Chmp4bl1	163	146	231	231
Chmp5	125.5	140	155	154.5
Chmp6	94	106	102	115
Chmp7	96	117	111.5	144.5
Chn1	147	167	192.5	174
Chodl	133	114	162.5	14
Chordc1	71	75.5	82.5	92
Chpf	97	108.5	107	127
Chpf2	121.5	136.5	119	69
Chpt1	92	96.5	89	100
Chrac1	120	93	112	112.5
Chrd	21	171.5	147.5	99
Chrdl1	174.5	169	180	148
Chrm3	113	127	128	124
Chrna4	121	41.5	85	172
Chrnb1	231	68	231	158
Chst1	94	110	153	131
Chst10	63	125.5	200	155.5
Chst12	111	142.5	223.5	168.5
Chst7	31.5	216.5	168	128.5
Chst8	45	89	56	68
Chsy1	108	87.5	126	131
Chtf8	147	129.5	117	127
Chtop	117	135	125	107
Chuk	85	101	115.5	123
Churc1	60	67.5	110.5	116
Ciao1	85.5	112	96	114.5
Ciapin1	93	106	91	106.5
Cib1	91	45	64	94
Cib2	99.5	119	141	118
Cic	181	182.5	203.5	192.5
Cinp	83	156	128	128
Cipc	101	138	136	168
Cirbp	124	128	132	133
Cirh1a	39	63.5	126	68
Cisd1	119	130	155	128
Cisd2	66	75	104	85
Cisd3	112	118	122	121
Cited2	101	140	131	116
Ciz1	38	37.5	23	26
Ckap2	196	121	205	86
Ckap4	102	104.5	132.5	163.5
Ckb	83	87	91	94
Ckmt1b	94.5	108	119	102.5
Cks1b	206	56	120	163
Clasp2	111	122	147	138.5
Clasrp	121.5	114	155	159.5
Clcc1	76	109	105.5	114
Clcn3	120.5	114	137	116
Clcn4	119.5	133	115	125
Clcn6	104	96	74	65
Cldn1	121.5	132.5	117	102
Cldn12	136	40	81	29
Cldn19	21	58.5	64.5	126.5
Cldn2	146	175	136	145
Cldn9	45	80	94	114.5
Cldnd1	151	153	198	157
Clec2l	112	122	110	125
Clic1	107.5	194.5	157	167
Clip1	141	164.5	89	99
Clip2	88	93	93.5	98
Clk1	185	230.5	167.5	197.5
Clk2	102.5	104	158	160
Clk3	51.5	25.5	82	69.5
Clmp	163	134	231	231
Cln3	48	57	58.5	129.5
Cln6	143.5	154.5	157	152
Cln8	81	77	150.5	115.5
Clns1a	117	120	136	134
Clp1	65.5	74	118	100
Clpb	96	101	110	95
Clptm1	127.5	132	130	130
Clptm1l	96.5	99	113	108
Clstn1	113	123.5	156	111
Clta	109	103	136	119
Cltb	74	76	82	80
Cltc	155	157	189	176.5
Clu	95	102	112	107
Cluap1	92	63	85	85
Clvs1	89	93	145	87.5
Cmas	78	108	109	78
Cmc1	64.5	67	82	64
Cmpk1	69	99	57	72
Cmpk2	89	115.5	85	76.5
Cmss1	77	71.5	136	68
Cmtm3	192	75.5	112	231
Cmtm5	59	63	66.5	68
Cmtr1	100	119.5	141	140
Cnbp	159	184	231	190
Cndp2	107.5	103	155	128
Cnih1	110	126.5	162	142
Cnih2	138	143	159	150
Cnih4	90	67	141	79.5
Cnksr2	99	122	155	107
Cnn3	108	118	132	124.5
Cnnm2	105	107.5	120.5	124.5
Cnnm3	38	126	157	142
Cnnm4	114	231	133.5	113
Cnot1	94	84	100	176
Cnot10	106.5	111.5	102	154.5
Cnot11	86	99.5	129.5	98
Cnot3	116	105	76	138.5
Cnot4	48	222	191	194
Cnot6	132	103	74.5	124
Cnot6l	175	125	152.5	231
Cnot7	113	130.5	137	132.5
Cnot8	105	104.5	115	127
Cnp	138.5	97	97.5	129
Cnpy2	94.5	103	156	133
Cnpy3	48	84	30	55
Cnpy4	80	58.5	96	153
Cnr1	54	154	93	106
Cnrip1	133	137	193.5	180
Cntf	109	173	152.5	142
Cntn1	122	119	23	49
Cntnap1	104	105.5	135	120.5
Cntnap4	83.5	136	140	158
Coa3	57.5	56.5	30	57.5
Coa4	111	140	113	155
Coa5	123	162.5	152.5	119
Coa7	129	96	129	93
Coasy	108	145	88.5	122
Cobl	117	101	125.5	180
Cog1	51.5	47	69	69.5
Cog2	80.5	104.5	82	64
Cog4	80.5	181	127.5	93
Cog7	205.5	96	188	142
Cog8	98	62	89	105
Coil	206	58.5	166	125
Col11a1	108	111	105	120
Col16a1	114	88	153	97
Col18a1	135	168	177	153
Col1a1	157	192	163	199.5
Col3a1	85.5	123	132	43
Col4a1	140	164.5	149	165
Col4a3bp	211.5	199	202	114
Col5a2	111	158	200.5	190
Col5a3	139.5	147	202	163.5
Col6a2	101	154	114	132
Colec12	84	137	224	231
Colgalt1	96	72	108	111
Commd1	74.5	102	231	230
Commd10	100	221	153	153.5
Commd2	130	131	134	139.5
Commd3	115	135	141	132
Commd4	103.5	121.5	199.5	159
Commd6	81	89.5	87	96
Commd8	137	133	209.5	122.5
Commd9	132	120	169.5	155
Comt	163	231	102.5	144
Comtd1	101.5	74	124	115
Copa	150.5	129	156	133.5
Copb1	46.5	65	157	92
Copb2	151.5	165	132	210
Copg1	52.5	54.5	27	184
Copg2	74.5	84.5	112	71
Coprs	77	66.5	94	55.5
Cops2	67.5	103	134	121.5
Cops3	60.5	105	68	66
Cops5	113	122	121	131
Cops6	73	67	71	78.5
Cops7a	130.5	209	223.5	220
Cops7b	129	117	167	151.5
Cops8	125	96	128	116.5
Copz1	130	133.5	141	143.5
Copz2	88.5	62.5	71.5	60
Coq10a	112	148	119.5	142
Coq10b	84	98	149	144
Coq2	189	113.5	157	112
Coq3	139	141.5	146.5	171
Coq4	107.5	161.5	130	97
Coq5	122.5	103.5	124	112
Coq6	67	84.5	133.5	163.5
Coq7	63	89.5	90	104
Coq9	90	136	231	191
Coro1a	88	120.5	107	110
Coro1b	43	144	148.5	184.5
Coro1c	83	92	78	134
Coro7	111.5	112	105	120.5
Cotl1	84	92	102.5	82
Cox16	130	114	129	137
Cox17	115	100.5	166	111
Cox18	92	159	169.5	156
Cox19	92	108	128	107.5
Cox20	73	83	104.5	132
Cox4i1	69	76	80	84
Cox5a	96	129.5	164	145
Cox5b	83	94.5	107.5	98
Cox6a1	95	101	101	101
Cox6a2	64.5	61.5	55.5	50
Cox6c	114.5	121	132	128
Cox7a2	49	45.5	114	88.5
Cox7a2l	135.5	141	160	150
Cox7b	153	214	221	213
Cox7c	99	103	166.5	136
Cox8a	63	64	60	53
Cp	178	229	230	231
Cpa2	45	79	59	58
Cpd	182.5	82	52	128.5
Cpe	128	135	149	149
Cplx1	172	182	182	181
Cplx2	61.5	145	84.5	98
Cpne2	204	76	27	113
Cpne4	149	152	176.5	158
Cpne5	83	93.5	85	106
Cpne6	93.5	116.5	133	147
Cpne7	86	123.5	140	151
Cpne8	134	124	116	110
Cpox	35	170	107.5	145
Cpped1	231	231	205	166
Cpq	157.5	147.5	149	175
Cpsf1	133	108	229.5	121.5
Cpsf2	94	120	133.5	114
Cpsf3	48	84	69	70.5
Cpsf3l	122	86	93	135
Cpsf6	112.5	95	134	138
Cpsf7	52	76.5	127	49
Cpt1a	69	135	125	128.5
Cpt1c	79	81	81	100
Cpt2	62	54	126	157
Cptp	83	68.5	101	70.5
Cpxm1	90	223.5	129.5	94
Cr1l	96.5	164	143.5	164
Crabp1	138	69.5	114	112.5
Crat	117	99	118	96
Crbn	210	142	216	153
Crcp	103	81	95.5	120
Creb3	105	111.5	126	143
Creb3l1	82	88	69	103
Crebbp	215	159	189	202
Crebl2	82.5	30	180	231
Crebrf	168.5	231	174	136.5
Crebzf	140	174	230.5	178
Creg1	175.5	92.5	100	58
Creld1	103	124	135.5	133
Creld2	66	159	114	158
Crem	100	158	142	88.5
Crhbp	227	158.5	172	175
Crip1	69	87.5	81	81
Crip2	48	57.5	56.5	60
Cript	78	98	113	110.5
Crlf1	116	47	134	154
Crlf2	97	109	101	114.5
Crls1	114	122	107	114
Crmp1	121.5	121	145.5	117
Crocc	154	145	137	108.5
Crot	143	110.5	89	120
Crtac1	117	134	133	149
Cry2	94.5	93	115.5	117.5
Cryab	65	57	107	59.5
Cryga	46	96.5	117	81
Crym	106.5	109	123	122
Cryz	121	105	114	158
Cryzl1	31	74.5	106	114
Cs	118	153	123	151
Csdc2	121	87.5	145	134
Csde1	85	107	109	123.5
Cse1l	136	118.5	134	113.5
Csf1	188	227	202	190
Csf2ra	74	128.5	107	162
Csk	82	141	98	141
Csnk1d	120	119.5	130	124
Csnk1g2	119.5	127	121	141.5
Csnk1g3	142	144	208.5	144.5
Csnk2a1	107	57.5	51	50
Csnk2a2	51	63	69	67
Csnk2b	137	153	193	173
Cspg5	81	111	76.5	73
Csrnp1	46.5	94	115.5	89
Csrnp2	102	120.5	164	122
Csrp1	81	84	97	84.5
Csrp2	95.5	108	40	112.5
Csrp2bp	92.5	117.5	84	100
Cst3	86	96	99	103
Cst6	75	79.5	61	97.5
Cstb	93	95	151	108.5
Cstf1	78	122	159	127
Cstf2	231	231	228	138
Cstf2t	106	97	140	119
Ctbp1	129	131.5	159	168.5
Ctbp2	171	161.5	126	167.5
Ctbs	152.5	184	216	160
Ctc1	88.5	105	112	138.5
Ctcf	112.5	226.5	210	188
Ctdnep1	79	86	106	97
Ctdp1	99	71	67.5	103.5
Ctdsp1	62	76	134	118
Ctdspl	72	80	101	133
Ctgf	69	95	70	78
Cth	122	101.5	152.5	143.5
Ctnna1	98	109	202.5	116
Ctnna2	148	186	215.5	186
Ctnnal1	100	142	143.5	72
Ctnnb1	181	128	153	76
Ctnnbip1	93	80	130	91.5
Ctnnbl1	125	48	96.5	80
Ctnnd2	76	79	104.5	114
Ctps1	165	168.5	190.5	209
Ctps2	111	133	118	150
Ctr9	71.5	89.5	94.5	97
Ctsa	119.5	124.5	140	157
Ctsb	75	84	89	88
Ctsc	53	51	161	155.5
Ctsd	90.5	103	101	104
Ctsf	107	106	126	119.5
Ctsh	119	127	144	126
Ctsl	84	105	135	111
Cttnbp2	154	130	216	197
Cttnbp2nl	125	151	197.5	189.5
Ctu1	158	157	167	71
Ctu2	60	118	202	98
Ctxn1	108	113.5	121	116
Cuedc2	56	58	72	128.5
Cul1	112.5	119	140	133
Cul2	93.5	83	111	74
Cul3	165.5	144	179.5	166
Cul4b	117	65	220	131
Cul5	91.5	95.5	16	60
Cul9	66	131	82	134
Cuta	70.5	77	91	93
Cutc	92.5	58	119	156
Cux2	167	149	192	93
Cwc15	158	177	153	170
Cwc25	74	117	147	116
Cwc27	231	46	113	53.5
Cwf19l1	143	67.5	150	95
Cwf19l2	181	153.5	102	66.5
Cx3cl1	117	106.5	143	132
Cxcl1	179	231	175	200
Cxcl12	211	53	180.5	185
Cxcl14	136.5	97	81	143
Cxcl16	169	223	124.5	99
Cxcr4	101	161	78.5	98
Cxcr7	87	78	56	104
Cxxc1	70	126	153	98
Cxxc4	225	140	178.5	137
Cxxc5	78	62	63.5	83.5
Cyb561	117.5	137	231	150
Cyb561a3	162	165	198	149
Cyb561d1	125.5	63	158	166
Cyb561d2	67	133.5	142	178
Cyb5a	110.5	115.5	97	106
Cyb5b	103	116	89.5	104
Cyb5d2	41	185	99	215
Cyb5r1	153.5	168.5	169	182.5
Cyb5r2	71.5	75	114	83.5
Cyb5r3	112	158	140	109
Cyb5r4	103	85	90.5	127
Cybrd1	66	105	73	117.5
Cyc1	83.5	93	172.5	99
Cycs	111.5	88.5	95	83.5
Cyfip1	163.5	190	199	178.5
Cyfip2	80	115	159	148
Cygb	87	113	124	104.5
Cyp1a1	102	48	171	64
Cyp27a1	231	231	166	188.5
Cyp2d4	125	100	133	152
Cyp2j3	60	138.5	76	83.5
Cyp2u1	82	105.5	141.5	130.5
Cyp46a1	107	120	106	117
Cyp4f1	65.5	86	227	156
Cyp4f6	68.5	76	93	81
Cyp4v3	118	68	111	117
Cyp51	94	117	138	121
Cyp7b1	65.5	91	78	84
Cyr61	51	132	172.5	93.5
Cyth2	83.5	95	123.5	98.5
Cyth3	127	165	231	159
D2hgdh	35	106	101.5	138
Daam1	150	122	158.5	159
Dab1	61	54	48.5	36.5
Dab2ip	95	101	81.5	100
Dact2	113	85	226	103
Dact3	100	119.5	119	128.5
Dad1	69	78.5	91.5	85.5
Dag1	105	118	173	130
Dagla	160	200	199	181
Daglb	140	86	165.5	96
Dalrd3	164.5	113	168.5	92
Dap	96.5	89	98	85.5
Dap3	107.5	90.5	129.5	123
Dapk1	75	80	122	71
Dapk3	40	71	55.5	54.5
Daxx	107.5	108	94	107.5
Dazap1	85.5	140	65	144.5
Dazap2	128	128	158	133
Dbi	73	78	82	80
Dbn1	114	134	165	145
Dbndd1	127.5	141	159.5	148
Dbndd2	81	96	110	125.5
Dbnl	90	102	113.5	109
Dbp	102	115	81	48.5
Dbr1	61.5	85	131	148
Dbt	47	79.5	113.5	217
Dcaf10	26	74	51	46
Dcaf11	122	114.5	133	126
Dcaf12	79	76	49.5	65
Dcaf13	58	116	123	115
Dcaf15	104	107	101.5	73
Dcaf4	28	68	19	117.5
Dcaf5	73	117	89	124.5
Dcaf7	115	109.5	130	115
Dcaf8	66.5	144	129	80
Dcakd	93.5	98.5	118.5	109.5
Dchs1	151	94	148.5	66
Dclk1	117	118	125	134.5
Dclk2	106	116	110	118.5
Dclre1a	38	167	230	165
Dcn	117	129	111	100.5
Dcps	135	123	152	231
Dctn1	103	119	143	130
Dctn2	95	112.5	114	121.5
Dctn3	136	125	137	147
Dctn5	168	118.5	167.5	148
Dctn6	105	123	136.5	111
Dctpp1	133.5	105	51	102
Dcun1d4	120	79.5	102	90
Dcun1d5	121	109	116	141
Dcx	104	134	120.5	138
Dcxr	79	79.5	161.5	95
Dda1	90	82.5	153	91.5
Ddah1	101	66.5	115.5	231
Ddah2	86.5	131.5	104	135.5
Ddb1	103.5	129	140	131.5
Ddhd1	45	71	134	113
Ddi2	164	177	179	139
Ddit3	93.5	89	100.5	99
Ddit4	123	87.5	140	143
Ddit4l2	80	65	74	108
Ddn	115	103	125	104
Ddost	138	167	178	159
Ddr2	85	130	135	140
Ddrgk1	79	80	87	88
Ddt	89	101	139	145.5
Ddx1	104	118	127	128.5
Ddx10	107	125.5	203	192
Ddx17	103.5	231	176.5	104
Ddx18	71	101	108	78
Ddx19a	69	77.5	138	129
Ddx19b	101	101	201.5	81
Ddx20	173.5	104	82	82
Ddx23	68	62	74	98.5
Ddx24	71.5	80.5	32	93
Ddx25	110	109.5	105	100.5
Ddx27	100	89	84	80
Ddx28	64.5	111	126	87
Ddx31	114	231	193	151.5
Ddx39a	64.5	110	71	75
Ddx39b	49	61	57.5	61
Ddx3x	127.5	142	146	135
Ddx41	66	41	119	84
Ddx42	108.5	87	110	119
Ddx46	118.5	169	145.5	163
Ddx47	83	67.5	76.5	45
Ddx49	66	76.5	109.5	66
Ddx5	119	145	171	169
Ddx50	182.5	128.5	152	167
Ddx51	157	128	156	209.5
Ddx52	124.5	139.5	231	85
Ddx54	115	108	151	61
Ddx55	112	74.5	50	103
Ddx58	76	115	147	131
Ddx59	120.5	212	111	146.5
Deaf1	173.5	113.5	177	156
Decr1	93	71	76	131.5
Decr2	119.5	149	230.5	231
Def8	157	138	141.5	54
Degs1	81.5	71.5	118	109
Dek	57	95	190.5	167
Dennd1a	78	119	147	93.5
Dennd5a	75	74	92	68
Dennd6b	30	55	107	75.5
Depdc5	64	180	139	176.5
Derl1	82	87	96	71.5
Desi1	80	100	123.5	65
Dexi	170	170	140	173.5
Dffa	91	83	122	134.5
Dgat1	90	87	85	103
Dgat2	177	171	154	168
Dgcr14	69	36	127	87
Dgcr6	109	95	84	119
Dgcr8	73.5	86	81.5	111
Dgkb	145	120	136	142
Dgki	34	85	141	131
Dgkq	160	76	123	118
Dgkz	74.5	97	120.5	112
Dguok	42	48	123	43.5
Dhcr7	59	57.5	104	78.5
Dhdds	134.5	91.5	151	98.5
Dhodh	72	136	193	153
Dhps	79	108	72	86
Dhrs1	110	76.5	231	53
Dhrs3	108.5	70	49	104
Dhrs4	156	91	213	127
Dhrs7b	82	108	107	115
Dhtkd1	164	188	197	145
Dhx15	94	97	105	96
Dhx16	61	94	158	114
Dhx30	49.5	76	72	81
Dhx32	77	79	129	115
Dhx34	26.5	57	24.5	116
Dhx35	115.5	104.5	130	112
Dhx36	69	102	162	135.5
Dhx37	87.5	57.5	114	200
Dhx38	183.5	133	156	195.5
Dhx40	81	107	103.5	103
Dhx57	190	198	222	207
Dhx9	76	64	105.5	96.5
Diaph1	88	94	57	76.5
Diexf	69	157	144	135
Dimt1	18	202	110	111.5
Dip2c	79	189	60	98.5
Dirc2	104	117	133.5	127
Dis3l	77.5	114	124	135
Dis3l2	31	44	32	28
Disp1	94.5	87	82.5	106
Disp2	126	148	213	199
Dixdc1	138	143.5	184.5	182
Dkc1	40	42	34	231
Dkk3	145	148	181	149.5
Dlat	122	103	121	132
Dld	138	123	167.5	163
Dleu7	193.5	71	227	136
Dlg2	83	101	94.5	120
Dlg3	73.5	120.5	134	83
Dlg4	140	165	110	119
Dlgap1	62	31	85.5	167
Dlgap3	122.5	109	155	154
Dlgap4	59.5	77	62	73
Dll1	184.5	110.5	197	231
Dlst	193	217	228.5	223.5
Dlx1	90	125	153	207
Dlx5	120	177	181.5	133
Dmap1	146.5	164.5	131	144
Dmd	39	231	125	134
Dmrt3	129	88	156.5	55
Dmrta2	77.5	188	77.5	86
Dmtn	74	58	106	87
Dnaaf2	121	152.5	172	159.5
Dnaaf3	86	98	91	97
Dnah1	58.5	78	71.5	160.5
Dnai1	79.5	40.5	31	103
Dnaja1	111	147	122	144.5
Dnaja2	104	108	126.5	113
Dnaja3	79	163	50	201
Dnajb1	91	122	147	125
Dnajb11	103	139.5	131	127
Dnajb12	73	93	98	117.5
Dnajb13	75	82	81	76
Dnajb14	108	196	138	83
Dnajb2	95	103	156	135
Dnajb5	132	113	136	139
Dnajb6	108	93	114	141
Dnajb9	116	95	145	119
Dnajc10	109	124	140	119
Dnajc11	105	96	105.5	116.5
Dnajc12	76	67	73	67
Dnajc14	48	83	69	103
Dnajc15	79	90	95.5	73
Dnajc17	51	84	122	76
Dnajc18	75.5	116	72.5	99
Dnajc19	75.5	70.5	70.5	74
Dnajc2	85.5	122	122.5	101.5
Dnajc24	100	101	59.5	81
Dnajc27	68	108	39	161.5
Dnajc3	93.5	87.5	71	114
Dnajc30	78	117.5	130	104.5
Dnajc4	103	104	71	87
Dnajc5	88	95.5	86	89
Dnajc7	59.5	73	51	62
Dnajc8	93	48	119.5	127
Dnajc9	153	105	209	170
Dnal4	195.5	171	207	138
Dnali1	95.5	178	48	137
Dnase2	166	134	167	166
Dnlz	106.5	117	124	110
Dnm1	116.5	116	145	135
Dnm1l	36.5	162	50	122
Dnm2	116	108.5	106	142
Dnmt1	37.5	54.5	82	52
Dnpep	98	125	124	123
Dnph1	82	50	50	120
Dnttip1	84	79	119	88
Dock1	100	159	179	189
Dock11	168.5	216	178	230
Dock6	92	69.5	110	102
Dock7	96	89.5	51	69
Dock9	122	140	189	158
Dohh	149	117	193	178.5
Dok5	82	95.5	93	109
Dolk	71.5	87	105	100
Dolpp1	114.5	196.5	191.5	152
Donson	83	231	138	113
Dopey2	113.5	66	22	131
Dos	61.5	49	56	56
Dot1l	231	61	137.5	60
Dpagt1	159	100	149	144
Dpcd	90	91.5	97	110
Dpf1	97	99	102.5	138
Dpf2	89	61	176.5	114
Dph2	93	82	116	72
Dph3	105	84.5	118	111.5
Dph5	174	55	173.5	173
Dpm1	108.5	164	125	204
Dpm2	118	103	105.5	84
Dpm3	53	61.5	35	48
Dpp7	104	115.5	134	121
Dpp8	94	86	123	96
Dpy19l1	123	139	110.5	109.5
Dpy19l3	104	106.5	106	103
Dpy30	54.5	90	103	91.5
Dpyd	56	231	215	56
Dpysl2	72	77	84	84
Dpysl4	109	131	135.5	137
Drap1	125	136	157	150
Drc1	124.5	231	133	102.5
Drg1	52.5	68	114	95
Drosha	146	115	152	125.5
Dscam	159	22	231	203
Dscr3	153	150	78	165.5
Dse	93.5	214	194.5	183
Dstn	109	112	121	124
Dstyk	96	201.5	132.5	204
Dtd1	99	134	142	111.5
Dtnb	130	120	109.5	124
Dtnbp1	143	145	145	151
Dtymk	211	181.5	186	212
Dus2	96	123.5	107.5	107
Dus3l	94	112	124.5	139
Dus4l	206.5	127	131	75
Dusp1	135	78	93	61.5
Dusp12	142	104	138	127
Dusp15	85.5	136	155	73.5
Dusp18	112	109.5	147	135
Dusp19	76.5	97.5	136	71
Dusp22	63	113	204	197
Dusp26	155	140	169	115
Dusp3	185	173.5	222.5	209
Dusp5	135.5	116.5	196	114
Dusp6	99	124	136	90
Dusp7	45	131	128	139
Dut	146	91	170	231
Dvl1	143.5	114	135	111
Dvl2	77.5	109	107.5	159.5
Dxo	113	72	130	148
Dym	93	94	91	97
Dync1h1	166	170	177	191
Dync1i1	146	145	163	148
Dync1i2	91	85	93	108.5
Dync1li2	105.5	106	117	121
Dync2h1	135	160	162	139.5
Dync2li1	95	132	132	115
Dynll1	92	91	122	112
Dynll2	113	123	118	113
Dynlrb1	69	76	70	74
Dynlrb2	79.5	87	98	90
Dynlt1	51	70	65	58.5
Dynlt3	128	141	152.5	147.5
Dyrk1a	136	126	231	183.5
Dyrk1b	124.5	45	156	46
Dyrk2	95	83	109.5	137.5
Dyrk3	93	87	88	69
Dyx1c1	231	175	231	122
Dzip1l	79	65	125	99
E2f4	148	156	163	82
E2f6	170	144	214	161
E4f1	83	167	173	177
Eaf1	159	140.5	169	152
Eapp	52.5	69	55	93
Ebag9	84.5	117.5	171.5	82
Ebi3	186	143	129	135
Ebp	118	81	111	163.5
Ebpl	86	58.5	82	75
Ece2	55.5	36	217	82
Ecel1	132	156	133	97
Ech1	53	55	60	61
Echdc1	138	100	157	135
Eci1	52.5	41.5	96	40.5
Eci2	116.5	87	106.5	83
Ecm1	143.5	115	139	167
Ecsit	227.5	87.5	184	231
Edc4	96	142	160	110.5
Edem2	164	103	138	99.5
Edf1	67	80	69	67.5
Ednra	148	122	109	143.5
Edrf1	143	174.5	227.5	178
Eea1	117.5	57.5	119	129.5
Eed	119	124	143	91
Eef1a2	113	116	125	126
Eef1b2	90	95	83	99
Eef1d	154.5	133.5	157	161.5
Eef1e1	99	97	116	101.5
Eef1g	128	139	153	139
Eef2	90	84	71	77
Eef2k	58.5	92.5	108	91.5
Eefsec	128	84	48	123
Eepd1	231	66.5	76	158.5
Efcab14	85	72.5	157	139
Efcab2	98	36.5	177.5	128
Efemp2	81	154.5	137	125
Efhc1	71	56	80	61
Efhd2	76	78.5	79	96
Efnb1	143	179.5	188	176
Efnb3	156	156.5	167	166.5
Efr3a	131	125	153	157
Efs	143	92	132.5	119
Eftud1	193	102	87	171
Egfl7	110	49	104	105
Egln2	73	61	114.5	84
Egln3	88	112.5	103	101
Egr2	105	151	144.5	153.5
Egr4	66.5	83.5	56.5	90
Ehbp1l1	109.5	113	146.5	156.5
Ehd1	111	143	150	109
Ehd4	106.5	84	120	119
Ehmt2	94	87	106	109.5
Ei24	85	114	105	142
Eid1	72	76	77	75
Eif1	55	65	53	62
Eif1a	90	143.5	104	117
Eif1ad	78	75	132	111.5
Eif1ax	37	60	78	58
Eif1b	101.5	112	139	133
Eif2a	68	56	197	157
Eif2ak1	87.5	161	172	170
Eif2ak2	155	111	184	163
Eif2ak3	166.5	45	103	148.5
Eif2ak4	133	120.5	50	73
Eif2b1	99	132	166	156.5
Eif2b2	172	130.5	157.5	143.5
Eif2b3	64	77	64	62
Eif2b4	105	121	78	93
Eif2b5	91.5	103.5	90	103.5
Eif2d	66	78	116	95
Eif2s1	103	90	139.5	38
Eif2s2	124.5	147	160	145
Eif2s3x	100	113.5	144	119.5
Eif3a	119	133	124	130
Eif3b	105.5	112	120	126.5
Eif3c	64	80	82	80.5
Eif3d	75	79.5	70	85
Eif3e	130	180.5	163	206
Eif3f	70	76	90	87
Eif3g	78	94	60	86
Eif3h	58	61.5	85	98
Eif3i	64	60	70.5	55
Eif3j	115	93.5	186	127.5
Eif3k	78.5	86	91	104
Eif3l	81.5	83	112.5	107
Eif3m	91.5	115	124.5	104
Eif4a1	75	82	92	92
Eif4a2	108	109	116	110
Eif4a3	117.5	103.5	126	118
Eif4b	74.5	103	97	97.5
Eif4e	47	96	129	139
Eif4e2	47	47	34	63.5
Eif4e3	155.5	186	169	195.5
Eif4ebp1	72	72	85	90.5
Eif4ebp3	84	116	178	215
Eif4g2	122	135	135	135
Eif4g3	73	170	124	180.5
Eif4h	136.5	136	160	146
Eif5	98	117.5	176	70
Eif5a	68	79	86	77.5
Eif5a2	107.5	142	121.5	114
Eif6	103	105	109	108
Elac2	77	147	121	102.5
Elavl1	97.5	93	105	91
Elavl2	107	119	134.5	99
Elf2	66	173.5	55	102
Elfn1	117.5	170	157	191
Elk1	72	94	104	103.5
Elk3	65	60	102.5	111
Elk4	93	140.5	180.5	167.5
Ell	150	144	39	83
Elmo1	86	79	76	113.5
Elmo2	135.5	115	231	104
Elmod1	71	78	89	88.5
Eln	64	87	55	84.5
Elof1	64	73	50	51.5
Elovl1	121	135	164	170
Elovl2	119	94	129.5	141
Elp5	123	60	78	79.5
Elp6	119	118	152	129.5
Emb	45	133	98.5	125
Emc1	210	186	231	226
Emc10	95	103.5	129	101
Emc2	105	95	79.5	98
Emc3	89.5	97	109	111
Emc4	179	125.5	215	168.5
Emc6	130	136.5	132	153
Emc8	60	67.5	68.5	71
Emc9	93	95	78	68
Emd	157.5	103	101.5	123
Emg1	57	64.5	52.5	60.5
Emid1	231	94	130	88
Emilin1	115.5	135	93	178
Eml2	40.5	80.5	23	86
Eml4	134.5	142.5	120	142.5
Emp1	126	107	175	150
Emp2	149.5	74.5	139	116
Emp3	106	189	28	93.5
Emx2	105.5	92.5	122	151.5
En2	156	121	179	130.5
Enah	57	50	173	150
Enc1	113	136	122.5	140
Endog	68	52.5	81.5	90
Engase	138.5	84.5	105.5	144
Enkur	90	127	141.5	119
Eno1	105	111	108	108
Eno4	181	75	231	145
Enoph1	102	100	68	60
Enpp2	127.5	134	153	154
Enpp4	78	122	231	122.5
Ensa	106	118	93	112
Enthd2	54	153	231	99
Entpd2	72.5	86	104	67
Entpd3	128	29	229	148
Entpd4	186	175	179	202.5
Entpd6	128.5	108	156	173
Eny2	84	99	113	102
Ep400	122	166	170	175
Epb41l1	120	128	144.5	155
Epb41l3	131	143.5	191	160
Epb41l4a	97	164	117	82
Epb41l4b	84	205	142	128
Epc2	119	82	155	126
Epdr1	104	87.5	117	125
Epha2	104	93	186	216
Epha4	126	154.5	180	182
Epha5	142	118	154	112
Ephb1	117	129	161	124.5
Ephx1	92.5	86.5	112.5	103
Ephx4	120	112	146	169.5
Epm2aip1	69	93	103.5	115.5
Epn1	51	77	50	108
Epn2	127.5	231	18	105
Eprs	70	75	48	73.5
Eps15	48	86	84.5	81
Eps15l1	170	231	231	231
Eral1	100	56	88	94.5
Erap1	100.5	121	137	161.5
Ercc1	58.5	116	92	72.5
Ercc2	81	131	153	212
Ercc3	104.5	97.5	125	125
Ercc6	175	231	217	231
Ercc8	119	172	126	127
Erf	57	101	104	114
Ergic2	73	99	200	183
Ergic3	80	81	97	90
Erh	93	110	105	119
Eri1	143	155.5	215	122.5
Eri2	182	133	230.5	35.5
Erlec1	84	87	168.5	138.5
Erlin1	98.5	161	139	154
Erlin2	157	136	57	175
Ermp1	82.5	120	138	127
Ero1l	74.5	117	148.5	103
Erp29	92	81	111.5	119.5
Erp44	70	124	113	110
Errfi1	126	120	111.5	90
Esco1	96.5	154	121	180
Esd	110	103	138.5	120
Esf1	129	149	142	127
Esrra	179	155	214.5	163
Esyt1	113	11	67	91
Etf1	84.5	69	158	119
Etfa	85	89.5	132	89.5
Etfb	55	66	79	87
Etfdh	140.5	125	108	116
Ethe1	74	74.5	128	75.5
Etnk1	128	180	146.5	201
Ets2	93.5	88.5	118	187
Etv1	133	114	118	112.5
Etv4	49	78	55	77
Etv5	102.5	106	115	128.5
Evc	99	80.5	93	95
Evc2	111	94.5	18	58
Evi5	84	107	123	121
Evl	78	61.5	67	88
Exd2	160	220	156	227
Exo5	82.5	109	105.5	111
Exoc2	101	106	113	98.5
Exoc3	71.5	89	97	74
Exoc5	98	65.5	103	108.5
Exoc6	219	190	174	146.5
Exoc6b	79	87.5	90.5	97
Exog	125	142	122	147
Exosc4	77.5	79	115.5	74
Exosc5	103	128.5	135.5	123
Exosc7	70	137.5	132	202
Exosc8	145	231	157	214.5
Exosc9	120.5	118	134.5	195
Ext1	95	89	105	82
Ext2	88.5	105	95	81
Extl1	60	66	97.5	58
Extl2	57.5	81	95	130.5
Ezh1	125	119	128.5	169.5
Ezr	98.5	106	119	127.5
F2r	92	98	101	90
F3	129	136	196.5	162
F8a1	116.5	126	132.5	153.5
Fabp3	120	78	117	103
Fabp5	57	66	61.5	63
Fabp7	49	58	61	52
Fads1	121.5	104.5	160	135
Fads2	48	55	71	68.5
Faf1	68.5	109	202.5	200
Faf2	106	146	128	113
Fahd1	110	147	127.5	128
Fahd2a	84	114	64.5	94
Faim2	82.5	104	104	98.5
Fam102b	101.5	154	203	173
Fam103a1	97	95	97	89
Fam104a	100	108	131	120
Fam107a	86	100	118	105
Fam107b	104	130	180	166
Fam110a	123	70.5	81	100
Fam110b	111	48.5	149.5	109.5
Fam116a	191	122.5	231	194
Fam117a	142	144	67	66
Fam117b	106.5	112	128	124.5
Fam118a	178	114	228.5	230.5
Fam118b	95	75	114	163
Fam120a	69	104	37	83
Fam120b	115	104	144.5	122
Fam122a	82	110	127	76
Fam126b	49	83	91	102
Fam129b	102.5	132	128	147
Fam131b	117	139.5	144	127
Fam133b	91	77	99	146.5
Fam134a	113	133.5	122	131.5
Fam134b	79.5	113	142.5	123
Fam134c	113.5	157	125.5	145
Fam135a	159	200.5	166	122
Fam136a	93.5	95	149	157
Fam13b	170.5	136	156	141
Fam149b1	92	105	56.5	70
Fam150b	231	159.5	231	168
Fam151b	85	102	156.5	144
Fam160a2	89	145	191	163
Fam160b2	206	110	147	74
Fam162a	52	63	39	53
Fam163a	48	113.5	218.5	116
Fam167a	149	145	231	206
Fam168a	69.5	171.5	115	231
Fam168b	75.5	103.5	128	69.5
Fam172a	98	122	114	132
[truncated: 5,471 more rows]
